# Supplementary material for: Phylogenomic Classification and Biosynthetic Potential of the Fossil Fuel-Biodesulfurizing Rhodococcus Strain IGTS8
Source: Front Microbiol. 2020 Jul 7;11:1417. doi: 10.3389/fmicb.2020.01417 (PMC7358434; doi:10.3389/fmicb.2020.01417)
Supplement: Supplementary file 4 [file Table_3.xlsx]

## Sheet: Pangenome
Supplementary Table 3. Details of genes in the pangenome of R. erythropolis and R. qingshengii strains.
Order	Gene	Annotation	No. isolates	No. sequences	Avg sequences per isolate	Genome Fragment	Order within Fragment	Accessory Fragment	Accessory Order with Fragment	QC	Min group size nuc	Max group size nuc	Avg group size nuc	ACN1	AV96	1159	VSD3	MI2	NSX2	NBRC 15567T	R138	BG43	S-43	NRRL B-16532	DN1	CCM2595	XP	PR4	IEGM 267	JCM 9803	JCM 9805	JCM 9804	CAS922i	JCM6824	SK121	djl-6-2	MK1	CS98	JCM 15477T	CW25	TUHH-12	IGTs8	BKS 20-40
1	group_10004	PTS system N-acetylglucosamine-specific IIB component / PTS system N-acetylglucosamine-specific IIC component	30	30	1	312	17963				299	1343	1250	re01.peg.4171_4171	re02.peg.5831_13012	re03.peg.5891_20117	re05.peg.5021_33484	re06.peg.3112_38139	re07.peg.5548_47761	re08.peg.3479_51864	re09.peg.2722_57604	re14.peg.3819_99648	re15.peg.5659_108310	re17.peg.5372_124278	re18.peg.5759_131594	re19.peg.3765_136311	re20.peg.5917_144691	re22.peg.4539_157331	re04.peg.3870_25175	re10.peg.4116_65691	re11.peg.3905_74629	re12.peg.4657_84143	re13.peg.2874_91506	re16.peg.143_112077	re21.peg.1652_147728	rq23.peg.4042_170621	rq24.peg.5404_178742	rq25.peg.5794_185590	rq26.peg.5455_191979	rq27.peg.6107_199911	rq28.peg.4413_204639	re30.peg.2606_162275	rq29.peg.75_208795
2	group_10006	Glucosamine-6-phosphate deaminase	30	30	1	312	17971				143	779	745	re01.peg.4175_4175	re02.peg.5827_13008	re03.peg.5895_20121	re05.peg.5017_33480	re06.peg.3116_38143	re07.peg.5544_47757	re08.peg.3483_51868	re09.peg.2726_57608	re14.peg.3815_99644	re15.peg.5653_108304	re17.peg.5376_124282	re18.peg.5755_131590	re19.peg.3761_136307	re20.peg.5913_144687	re22.peg.4535_157327	re04.peg.3866_25171	re10.peg.4126_65701	re11.peg.3910_74634	re12.peg.4664_84150	re13.peg.2870_91502	re16.peg.256_112190	re21.peg.1656_147732	rq23.peg.4038_170617	rq24.peg.5400_178738	rq25.peg.5790_185586	rq26.peg.5451_191975	rq27.peg.6103_199907	rq28.peg.4417_204643	re30.peg.2602_162271	rq29.peg.79_208799
3	group_10011	Undecaprenyl-phosphate N-acetylglucosaminyl 1-phosphate transferase	30	30	1	312	18043				419	1187	1108	re01.peg.4223_4223	re02.peg.5775_12956	re03.peg.5940_20166	re05.peg.4970_33433	re06.peg.3160_38187	re07.peg.5500_47713	re08.peg.3532_51917	re09.peg.2770_57652	re14.peg.3771_99600	re15.peg.5588_108239	re17.peg.5420_124326	re18.peg.5708_131543	re19.peg.3717_136263	re20.peg.5869_144643	re22.peg.4491_157283	re04.peg.3820_25125	re10.peg.8023_69598	re11.peg.7672_78396	re12.peg.7808_87294	re13.peg.2825_91457	re16.peg.300_112234	re21.peg.1701_147777	rq23.peg.3994_170573	rq24.peg.5356_178694	rq25.peg.5744_185540	rq26.peg.5407_191931	rq27.peg.6058_199862	rq28.peg.4475_204701	re30.peg.2558_162227	rq29.peg.123_208843
4	group_10026	Putative membrane-bound ClpP-class protease associated with aq_911	30	30	1	312	30443				470	581	563	re01.peg.4295_4295	re02.peg.4812_11993	re03.peg.5261_19487	re05.peg.6245_34708	re06.peg.2072_37100	re07.peg.59_42272	re08.peg.4666_53051	re09.peg.776_55658	re14.peg.5857_101686	re15.peg.8488_111139	re17.peg.6313_125219	re18.peg.6116_131951	re19.peg.5766_138312	re20.peg.2134_140908	re22.peg.6486_159278	re04.peg.5507_26812	re10.peg.6541_68116	re11.peg.3742_74466	re12.peg.5474_84960	re13.peg.5650_94282	re16.peg.1727_113661	re21.peg.6195_152271	rq23.peg.6191_172770	rq24.peg.3937_177275	rq25.peg.4532_184328	rq26.peg.347_186871	rq27.peg.2085_195889	rq28.peg.2814_203040	re30.peg.4795_164464	rq29.peg.5898_214618
5	group_10033	hypothetical protein	30	30	1	312	30129				230	284	268	re01.peg.4419_4419	re02.peg.4917_12098	re03.peg.176_14402	re05.peg.103_28566	re06.peg.1276_36304	re07.peg.175_42388	re08.peg.6264_54649	re09.peg.931_55813	re14.peg.5697_101526	re15.peg.8303_110954	re17.peg.5545_124451	re18.peg.3578_129413	re19.peg.5621_138167	re20.peg.2009_140783	re22.peg.6379_159171	re04.peg.2159_23464	re10.peg.2233_63808	re11.peg.162_70886	re12.peg.32_79518	re13.peg.6261_94893	re16.peg.1853_113787	re21.peg.3170_149246	rq23.peg.6068_172647	rq24.peg.4138_177476	rq25.peg.4652_184448	rq26.peg.25_186549	rq27.peg.2221_196025	rq28.peg.4126_204352	re30.peg.4636_164305	rq29.peg.6055_214775
6	group_10034	hypothetical protein	30	30	1	312	30127				293	293	293	re01.peg.4420_4420	re02.peg.4918_12099	re03.peg.177_14403	re05.peg.104_28567	re06.peg.1275_36303	re07.peg.176_42389	re08.peg.6265_54650	re09.peg.932_55814	re14.peg.5696_101525	re15.peg.8302_110953	re17.peg.5544_124450	re18.peg.3579_129414	re19.peg.5620_138166	re20.peg.2008_140782	re22.peg.6378_159170	re04.peg.2160_23465	re10.peg.2234_63809	re11.peg.163_70887	re12.peg.33_79519	re13.peg.6260_94892	re16.peg.1854_113788	re21.peg.3171_149247	rq23.peg.6067_172646	rq24.peg.513_173851	rq25.peg.4653_184449	rq26.peg.26_186550	rq27.peg.2222_196026	rq28.peg.4125_204351	re30.peg.4635_164304	rq29.peg.6056_214776
7	group_10038	Cytochrome c oxidase polypeptide I	30	30	1	312	9079				1034	1742	1690	re01.peg.4474_4474	re02.peg.435_7616	re03.peg.2793_17019	re05.peg.5576_34039	re06.peg.2187_37215	re07.peg.2118_44331	re08.peg.1391_49776	re09.peg.5340_60222	re14.peg.1213_97042	re15.peg.1938_104589	re17.peg.2734_121640	re18.peg.4702_130537	re19.peg.1162_133708	re20.peg.3860_142634	re22.peg.1704_154496	re04.peg.5580_26885	re10.peg.1297_62872	re11.peg.822_71546	re12.peg.2073_81559	re13.peg.549_89181	re16.peg.6299_118233	re21.peg.1747_147823	rq23.peg.1267_167846	rq24.peg.370_173708	rq25.peg.5711_185507	rq26.peg.6923_193447	rq27.peg.663_194467	rq28.peg.6761_206986	re30.peg.5503_165172	rq29.peg.244_208964
8	group_10040	hypothetical protein	30	30	1	312	8748				242	257	255	re01.peg.4611_4611	re02.peg.364_7545	re03.peg.3643_17869	re05.peg.5499_33962	re06.peg.2289_37317	re07.peg.2192_44405	re08.peg.3779_52164	re09.peg.5264_60146	re14.peg.1299_97128	re15.peg.2041_104692	re17.peg.2816_121722	re18.peg.4638_130473	re19.peg.1237_133783	re20.peg.3789_142563	re22.peg.1768_154560	re04.peg.4045_25350	re10.peg.1195_62770	re11.peg.916_71640	re12.peg.2181_81667	re13.peg.630_89262	re16.peg.6215_118149	re21.peg.3884_149960	rq23.peg.1351_167930	rq24.peg.443_173781	rq25.peg.5610_185406	rq26.peg.7011_193535	rq27.peg.590_194394	rq28.peg.6830_207055	re30.peg.5574_165243	rq29.peg.328_209048
9	group_10041	putative phosphodiesterase	30	30	1	312	8727				614	722	715	re01.peg.4625_4625	re02.peg.350_7531	re03.peg.3630_17856	re05.peg.5485_33948	re06.peg.2304_37332	re07.peg.2205_44418	re08.peg.3793_52178	re09.peg.5250_60132	re14.peg.1313_97142	re15.peg.2054_104705	re17.peg.2830_121736	re18.peg.4625_130460	re19.peg.1251_133797	re20.peg.3775_142549	re22.peg.1781_154573	re04.peg.4032_25337	re10.peg.1181_62756	re11.peg.930_71654	re12.peg.3971_83457	re13.peg.643_89275	re16.peg.6201_118135	re21.peg.3871_149947	rq23.peg.1365_167944	rq24.peg.457_173795	rq25.peg.5596_185392	rq26.peg.3545_190069	rq27.peg.576_194380	rq28.peg.6815_207040	re30.peg.5588_165257	rq29.peg.342_209062
10	group_10046	Transcriptional regulator GntR family	30	30	1	312	29365				449	668	660	re01.peg.4663_4663	re02.peg.2928_10109	re03.peg.2608_16834	re05.peg.442_28905	re06.peg.1704_36732	re07.peg.506_42719	re08.peg.337_48722	re09.peg.1262_56144	re14.peg.5367_101196	re15.peg.7776_110427	re17.peg.3855_122761	re18.peg.217_126053	re19.peg.5284_137830	re20.peg.1677_140451	re22.peg.6048_158840	re04.peg.2503_23808	re10.peg.4363_65938	re11.peg.1573_72297	re12.peg.4797_84283	re13.peg.5655_94287	re16.peg.1225_113159	re21.peg.964_147040	rq23.peg.5655_172234	rq24.peg.875_174213	rq25.peg.1194_180990	rq26.peg.1353_187877	rq27.peg.2584_196388	rq28.peg.6411_206636	re30.peg.4170_163839	rq29.peg.2180_210900
11	group_10054	putative esterase	30	30	1	312	29089				767	1013	953	re01.peg.4689_4689	re02.peg.2897_10078	re03.peg.2582_16808	re05.peg.468_28931	re06.peg.1678_36706	re07.peg.532_42745	re08.peg.363_48748	re09.peg.1290_56172	re14.peg.5351_101180	re15.peg.7736_110387	re17.peg.3885_122791	re18.peg.244_126080	re19.peg.5258_137804	re20.peg.1651_140425	re22.peg.6031_158823	re04.peg.2532_23837	re10.peg.4328_65903	re11.peg.1609_72333	re12.peg.4835_84321	re13.peg.5680_94312	re16.peg.1200_113134	re21.peg.938_147014	rq23.peg.5629_172208	rq24.peg.902_174240	rq25.peg.1167_180963	rq26.peg.1380_187904	rq27.peg.2612_196416	rq28.peg.6378_206603	re30.peg.4143_163812	rq29.peg.2153_210873
12	group_10055	Transcriptional regulator IclR family	30	30	1	312	28985				143	785	763	re01.peg.4750_4750	re02.peg.2832_10013	re03.peg.2521_16747	re05.peg.530_28993	re06.peg.1619_36647	re07.peg.595_42808	re08.peg.425_48810	re09.peg.1349_56231	re14.peg.5293_101122	re15.peg.7640_110291	re17.peg.3950_122856	re18.peg.305_126141	re19.peg.5195_137741	re20.peg.1591_140365	re22.peg.5972_158764	re04.peg.2595_23900	re10.peg.338_61913	re11.peg.1680_72404	re12.peg.1684_81170	re13.peg.5747_94379	re16.peg.1136_113070	re21.peg.863_146939	rq23.peg.5565_172144	rq24.peg.966_174304	rq25.peg.1105_180901	rq26.peg.1443_187967	rq27.peg.2677_196481	rq28.peg.7098_207323	re30.peg.4079_163748	rq29.peg.2092_210812
13	group_10057	NAD(P)HX epimerase / NAD(P)HX dehydratase	30	30	1	312	28983				344	788	773	re01.peg.4752_4752	re02.peg.2830_10011	re03.peg.2519_16745	re05.peg.532_28995	re06.peg.1617_36645	re07.peg.597_42810	re08.peg.427_48812	re09.peg.1351_56233	re14.peg.5291_101120	re15.peg.7637_110288	re17.peg.3952_122858	re18.peg.307_126143	re19.peg.5193_137739	re20.peg.1589_140363	re22.peg.5970_158762	re04.peg.2597_23902	re10.peg.342_61917	re11.peg.1682_72406	re12.peg.1687_81173	re13.peg.5749_94381	re16.peg.1134_113068	re21.peg.861_146937	rq23.peg.5563_172142	rq24.peg.968_174306	rq25.peg.1103_180899	rq26.peg.1445_187969	rq27.peg.2679_196483	rq28.peg.6097_206322	re30.peg.4077_163746	rq29.peg.2090_210810
14	group_10066	transglutaminase domain protein	30	30	1	312	28752				494	803	792	re01.peg.4792_4792	re02.peg.2783_9964	re03.peg.2473_16699	re05.peg.585_29048	re06.peg.1565_36593	re07.peg.642_42855	re08.peg.474_48859	re09.peg.1389_56271	re14.peg.5244_101073	re15.peg.7579_110230	re17.peg.4001_122907	re18.peg.358_126194	re19.peg.5146_137692	re20.peg.1538_140312	re22.peg.5922_158714	re04.peg.2643_23948	re10.peg.413_61988	re11.peg.1758_72482	re12.peg.1757_81243	re13.peg.5817_94449	re16.peg.1087_113021	re21.peg.808_146884	rq23.peg.5507_172086	rq24.peg.1030_174368	rq25.peg.1055_180851	rq26.peg.1489_188013	rq27.peg.2815_196619	rq28.peg.6151_206376	re30.peg.4034_163703	rq29.peg.2284_211004
15	group_10068	Dienelactone hydrolase family	30	30	1	312	28705				611	716	695	re01.peg.4814_4814	re02.peg.2765_9946	re03.peg.2456_16682	re05.peg.602_29065	re06.peg.1547_36575	re07.peg.659_42872	re08.peg.493_48878	re09.peg.1406_56288	re14.peg.5227_101056	re15.peg.7559_110210	re17.peg.4018_122924	re18.peg.376_126212	re19.peg.5129_137675	re20.peg.1520_140294	re22.peg.5905_158697	re04.peg.2660_23965	re10.peg.441_62016	re11.peg.7409_78133	re12.peg.6879_86365	re13.peg.5839_94471	re16.peg.1068_113002	re21.peg.786_146862	rq23.peg.5488_172067	rq24.peg.1047_174385	rq25.peg.1038_180834	rq26.peg.1506_188030	rq27.peg.2833_196637	rq28.peg.6173_206398	re30.peg.4017_163686	rq29.peg.2301_211021
16	group_10069	Succinyl-CoA:3-ketoacid-coenzyme A transferase subunit A	30	30	1	312	28695				269	758	673	re01.peg.4823_4823	re02.peg.2756_9937	re03.peg.2446_16672	re05.peg.611_29074	re06.peg.1538_36566	re07.peg.668_42881	re08.peg.502_48887	re09.peg.1415_56297	re14.peg.5218_101047	re15.peg.7548_110199	re17.peg.4027_122933	re18.peg.384_126220	re19.peg.5120_137666	re20.peg.1511_140285	re22.peg.5896_158688	re04.peg.2669_23974	re10.peg.454_62029	re11.peg.7363_78087	re12.peg.6482_85968	re13.peg.5848_94480	re16.peg.1059_112993	re21.peg.777_146853	rq23.peg.5479_172058	rq24.peg.1056_174394	rq25.peg.1029_180825	rq26.peg.1515_188039	rq27.peg.2842_196646	rq28.peg.6182_206407	re30.peg.4008_163677	rq29.peg.2310_211030
17	group_10072	hypothetical protein	30	30	1	312	28687				500	635	614	re01.peg.4828_4828	re02.peg.2749_9930	re03.peg.2441_16667	re05.peg.617_29080	re06.peg.1533_36561	re07.peg.673_42886	re08.peg.507_48892	re09.peg.1420_56302	re14.peg.5213_101042	re15.peg.7542_110193	re17.peg.4032_122938	re18.peg.389_126225	re19.peg.5115_137661	re20.peg.1506_140280	re22.peg.5891_158683	re04.peg.2674_23979	re10.peg.462_62037	re11.peg.7370_78094	re12.peg.6474_85960	re13.peg.5854_94486	re16.peg.1054_112988	re21.peg.772_146848	rq23.peg.5474_172053	rq24.peg.1061_174399	rq25.peg.1024_180820	rq26.peg.1520_188044	rq27.peg.2847_196651	rq28.peg.6188_206413	re30.peg.4003_163672	rq29.peg.2315_211035
18	group_10073	Predicted L-lactate dehydrogenase Iron-sulfur cluster-binding subunit YkgF	30	30	1	312	28658				746	1520	1474	re01.peg.4841_4841	re02.peg.2736_9917	re03.peg.2428_16654	re05.peg.630_29093	re06.peg.1520_36548	re07.peg.686_42899	re08.peg.520_48905	re09.peg.1433_56315	re14.peg.5200_101029	re15.peg.7523_110174	re17.peg.4045_122951	re18.peg.403_126239	re19.peg.5102_137648	re20.peg.1493_140267	re22.peg.5878_158670	re04.peg.2687_23992	re10.peg.476_62051	re11.peg.7386_78110	re12.peg.6456_85942	re13.peg.5867_94499	re16.peg.1041_112975	re21.peg.759_146835	rq23.peg.5461_172040	rq24.peg.1074_174412	rq25.peg.1011_180807	rq26.peg.1533_188057	rq27.peg.2860_196664	rq28.peg.7779_208004	re30.peg.3990_163659	rq29.peg.2328_211048
19	group_10085	Transcription-repair coupling factor	30	30	1	312	26428				266	656	613	re01.peg.4870_4869	re02.peg.5358_12539	re03.peg.2183_16409	re05.peg.1622_30085	re06.peg.2500_37528	re07.peg.3024_45237	re08.peg.5807_54192	re09.peg.2372_57254	re14.peg.4183_100012	re15.peg.6173_108824	re17.peg.3489_122395	re18.peg.2348_128184	re19.peg.4130_136676	re20.peg.531_139305	re22.peg.4905_157697	re04.peg.2867_24172	re10.peg.6331_67906	re11.peg.4977_75701	re12.peg.5303_84789	re13.peg.3213_91845	re16.peg.2296_114230	re21.peg.6426_152502	rq23.peg.4469_171048	rq24.peg.3616_176954	rq25.peg.113_179909	rq26.peg.2117_188641	rq27.peg.5797_199601	rq28.peg.1455_201681	re30.peg.3063_162732	rq29.peg.1691_210411
20	group_10088	Archaeal seryl-tRNA synthetase-related sequence	30	30	1	312	26422				659	956	935	re01.peg.4874_4873	re02.peg.5354_12535	re03.peg.2187_16413	re05.peg.1626_30089	re06.peg.2496_37524	re07.peg.3020_45233	re08.peg.5803_54188	re09.peg.2376_57258	re14.peg.4179_100008	re15.peg.6169_108820	re17.peg.3485_122391	re18.peg.2352_128188	re19.peg.4126_136672	re20.peg.527_139301	re22.peg.4901_157693	re04.peg.2863_24168	re10.peg.6335_67910	re11.peg.4973_75697	re12.peg.5307_84793	re13.peg.3217_91849	re16.peg.2292_114226	re21.peg.6422_152498	rq23.peg.4465_171044	rq24.peg.3612_176950	rq25.peg.109_179905	rq26.peg.2121_188645	rq27.peg.5801_199605	rq28.peg.1451_201677	re30.peg.3059_162728	rq29.peg.1687_210407
21	group_10095	Nitroreductase family protein	30	30	1	312	26254				320	686	671	re01.peg.4913_4912	re02.peg.3939_11120	re03.peg.2221_16447	re05.peg.1667_30130	re06.peg.2456_37484	re07.peg.2987_45200	re08.peg.5074_53459	re09.peg.2417_57299	re14.peg.4144_99973	re15.peg.6112_108763	re17.peg.3444_122350	re18.peg.2398_128234	re19.peg.4092_136638	re20.peg.483_139257	re22.peg.4867_157659	re04.peg.2821_24126	re10.peg.6450_68025	re11.peg.6914_77638	re12.peg.6530_86016	re13.peg.3259_91891	re16.peg.2256_114190	re21.peg.3515_149591	rq23.peg.4341_170920	rq24.peg.3577_176915	rq25.peg.5294_185090	rq26.peg.6777_193301	rq27.peg.5836_199640	rq28.peg.1401_201627	re30.peg.3018_162687	rq29.peg.1645_210365
22	group_10099	Hemoglobin-dependent two component system response regulator HrrA	30	30	1	312	26218				320	719	676	re01.peg.4938_4937	re02.peg.3966_11147	re03.peg.2245_16471	re05.peg.1691_30154	re06.peg.3850_38877	re07.peg.2963_45176	re08.peg.5050_53435	re09.peg.2441_57323	re14.peg.4120_99949	re15.peg.6075_108726	re17.peg.3420_122326	re18.peg.2422_128258	re19.peg.4068_136614	re20.peg.459_139233	re22.peg.4843_157635	re04.peg.2797_24102	re10.peg.7597_69172	re11.peg.7158_77882	re12.peg.8009_87495	re13.peg.3284_91916	re16.peg.2232_114166	re21.peg.5417_151493	rq23.peg.4317_170896	rq24.peg.3553_176891	rq25.peg.5318_185114	rq26.peg.6801_193325	rq27.peg.5861_199665	rq28.peg.1374_201600	re30.peg.2993_162662	rq29.peg.212_208932
23	group_10102	FIG00821686: hypothetical protein	30	30	1	312	26196				599	707	656	re01.peg.4952_4951	re02.peg.3982_11163	re03.peg.2259_16485	re05.peg.1706_30169	re06.peg.2161_37189	re07.peg.2948_45161	re08.peg.5035_53420	re09.peg.2455_57337	re14.peg.4105_99934	re15.peg.6058_108709	re17.peg.3406_122312	re18.peg.2436_128272	re19.peg.4054_136600	re20.peg.444_139218	re22.peg.4828_157620	re04.peg.2783_24088	re10.peg.7577_69152	re11.peg.7179_77903	re12.peg.8927_88413	re13.peg.3298_91930	re16.peg.2218_114152	re21.peg.5403_151479	rq23.peg.4303_170882	rq24.peg.3539_176877	rq25.peg.5333_185129	rq26.peg.6815_193339	rq27.peg.5875_199679	rq28.peg.1358_201584	re30.peg.2978_162647	rq29.peg.198_208918
24	group_10106	FIG00999954: hypothetical protein	30	30	1	312	26085				188	416	332	re01.peg.4998_4997	re02.peg.4026_11207	re03.peg.2301_16527	re05.peg.1748_30211	re06.peg.2122_37150	re07.peg.2903_45116	re08.peg.4994_53379	re09.peg.2495_57377	re14.peg.4063_99892	re15.peg.5999_108650	re17.peg.3367_122273	re18.peg.2477_128313	re19.peg.4014_136560	re20.peg.391_139165	re22.peg.4786_157578	re04.peg.2743_24048	re10.peg.5792_67367	re11.peg.4623_75347	re12.peg.5948_85434	re13.peg.3336_91968	re16.peg.2178_114112	re21.peg.5365_151441	rq23.peg.4263_170842	rq24.peg.5881_179219	rq25.peg.5372_185168	rq26.peg.7034_193558	rq27.peg.5914_199718	rq28.peg.1305_201531	re30.peg.2936_162605	rq29.peg.158_208878
25	group_10107	hypothetical protein	30	30	1	312	26047				512	701	675	re01.peg.5017_5016	re02.peg.4047_11228	re03.peg.2321_16547	re05.peg.1767_30230	re06.peg.2103_37131	re07.peg.2885_45098	re08.peg.4975_53360	re09.peg.2514_57396	re14.peg.4043_99872	re15.peg.5976_108627	re17.peg.3348_122254	re18.peg.2495_128331	re19.peg.3996_136542	re20.peg.373_139147	re22.peg.4767_157559	re04.peg.2724_24029	re10.peg.5770_67345	re11.peg.4647_75371	re12.peg.5976_85462	re13.peg.3355_91987	re16.peg.2160_114094	re21.peg.5346_151422	rq23.peg.4244_170823	rq24.peg.5899_179237	rq25.peg.5391_185187	rq26.peg.7052_193576	rq27.peg.5933_199737	rq28.peg.7555_207780	re30.peg.2917_162586	rq29.peg.139_208859
26	group_10115	Cyclohexanone monooxygenase	30	30	1	312	29933				452	1460	1295	re01.peg.5057_5056	re02.peg.3205_10386	re03.peg.6193_20419	re05.peg.177_28640	re06.peg.1204_36232	re07.peg.248_42461	re08.peg.68_48453	re09.peg.1004_55886	re14.peg.5630_101459	re15.peg.8210_110861	re17.peg.3300_122206	re18.peg.3655_129490	re19.peg.5549_138095	re20.peg.1936_140710	re22.peg.6306_159098	re04.peg.2240_23545	re10.peg.2343_63918	re11.peg.263_70987	re12.peg.150_79636	re13.peg.6181_94813	re16.peg.5088_117022	re21.peg.3253_149329	rq23.peg.5985_172564	rq24.peg.601_173939	rq25.peg.1460_181256	rq26.peg.4921_191445	rq27.peg.2315_196119	rq28.peg.6433_206658	re30.peg.4549_164218	rq29.peg.2523_211243
27	group_10122	hypothetical protein	30	30	1	312	29894				596	674	598	re01.peg.5071_5070	re02.peg.3188_10369	re03.peg.6173_20399	re05.peg.195_28658	re06.peg.1190_36218	re07.peg.262_42475	re08.peg.85_48470	re09.peg.1018_55900	re14.peg.5613_101442	re15.peg.8184_110835	re17.peg.3282_122188	re18.peg.3671_129506	re19.peg.5536_138082	re20.peg.1923_140697	re22.peg.6292_159084	re04.peg.2259_23564	re10.peg.6648_68223	re11.peg.1180_71904	re12.peg.191_79677	re13.peg.6162_94794	re16.peg.5070_117004	re21.peg.3271_149347	rq23.peg.5966_172545	rq24.peg.621_173959	rq25.peg.1441_181237	rq26.peg.4904_191428	rq27.peg.2334_196138	rq28.peg.6457_206682	re30.peg.4531_164200	rq29.peg.2542_211262
28	group_10126	Probable nonspecific lipid-transfer protein	30	30	1	312	29831				764	1232	1164	re01.peg.5106_5105	re02.peg.3151_10332	re03.peg.6140_20366	re05.peg.228_28691	re06.peg.1155_36183	re07.peg.295_42508	re08.peg.119_48504	re09.peg.1051_55933	re14.peg.5579_101408	re15.peg.8134_110785	re17.peg.3247_122153	re18.peg.3705_129540	re19.peg.5503_138049	re20.peg.1890_140664	re22.peg.6258_159050	re04.peg.2295_23600	re10.peg.6691_68266	re11.peg.1138_71862	re12.peg.237_79723	re13.peg.6125_94757	re16.peg.5036_116970	re21.peg.3307_149383	rq23.peg.5931_172510	rq24.peg.656_173994	rq25.peg.1405_181201	rq26.peg.4869_191393	rq27.peg.2370_196174	rq28.peg.2053_202279	re30.peg.4496_164165	rq29.peg.2579_211299
29	group_10151	Lipid A export ATP-binding/permease protein MsbA	30	30	1	312	8392				278	1733	1656	re01.peg.5218_5217	re02.peg.186_7367	re03.peg.58_14284	re05.peg.5387_33850	re06.peg.5563_40590	re07.peg.2345_44558	re08.peg.3935_52320	re09.peg.5106_59988	re14.peg.1455_97284	re15.peg.2259_104910	re17.peg.2969_121875	re18.peg.4875_130710	re19.peg.1396_133942	re20.peg.6232_145006	re22.peg.1921_154713	re04.peg.5850_27155	re10.peg.5850_67425	re11.peg.4451_75175	re12.peg.4890_84376	re13.peg.1394_90026	re16.peg.6051_117985	re21.peg.4531_150607	rq23.peg.1514_168093	rq24.peg.4468_177806	rq25.peg.3933_183729	rq26.peg.3706_190230	rq27.peg.419_194223	rq28.peg.5548_205773	re30.peg.5758_165427	rq29.peg.506_209226
30	group_10154	Sterol-regulatory element binding protein (SREBP) site 2 protease family	30	30	1	312	8403				254	788	738	re01.peg.5227_5226	re02.peg.196_7377	re03.peg.67_14293	re05.peg.5378_33841	re06.peg.5554_40581	re07.peg.2336_44549	re08.peg.3926_52311	re09.peg.5115_59997	re14.peg.1446_97275	re15.peg.2246_104897	re17.peg.2960_121866	re18.peg.4866_130701	re19.peg.1387_133933	re20.peg.6223_144997	re22.peg.1912_154704	re04.peg.5859_27164	re10.peg.5838_67413	re11.peg.4438_75162	re12.peg.4875_84361	re13.peg.1403_90035	re16.peg.6060_117994	re21.peg.4540_150616	rq23.peg.1505_168084	rq24.peg.4477_177815	rq25.peg.3942_183738	rq26.peg.3697_190221	rq27.peg.428_194232	rq28.peg.5537_205762	re30.peg.5749_165418	rq29.peg.497_209217
31	group_10160	Proline iminopeptidase	30	30	1	312	8459				443	707	667	re01.peg.5248_5247	re02.peg.221_7402	re03.peg.3519_17745	re05.peg.5357_33820	re06.peg.2416_37444	re07.peg.2315_44528	re08.peg.3905_52290	re09.peg.5136_60018	re14.peg.1425_97254	re15.peg.2213_104864	re17.peg.2940_121846	re18.peg.5629_131464	re19.peg.1367_133913	re20.peg.6196_144970	re22.peg.1891_154683	re04.peg.5987_27292	re10.peg.8529_70104	re11.peg.8109_78833	re12.peg.2926_82412	re13.peg.1424_90056	re16.peg.6080_118014	re21.peg.4561_150637	rq23.peg.1485_168064	rq24.peg.5763_179101	rq25.peg.3964_183760	rq26.peg.3676_190200	rq27.peg.448_194252	rq28.peg.5513_205738	re30.peg.5727_165396	rq29.peg.476_209196
32	group_10161	3-oxoacyl-[acyl-carrier protein] reductase	30	30	1	312	8550				701	797	785	re01.peg.5297_5296	re02.peg.269_7450	re03.peg.3561_17787	re05.peg.5312_33775	re06.peg.2375_37403	re07.peg.2272_44485	re08.peg.3864_52249	re09.peg.5177_60059	re14.peg.1383_97212	re15.peg.2160_104811	re17.peg.2898_121804	re18.peg.5674_131509	re19.peg.1324_133870	re20.peg.6146_144920	re22.peg.1849_154641	re04.peg.3959_25264	re10.peg.5317_66892	re11.peg.4237_74961	re12.peg.2859_82345	re13.peg.1473_90105	re16.peg.6129_118063	re21.peg.4610_150686	rq23.peg.1437_168016	rq24.peg.5716_179054	rq25.peg.4014_183810	rq26.peg.3629_190153	rq27.peg.495_194299	rq28.peg.5459_205684	re30.peg.5673_165342	rq29.peg.426_209146
33	group_10165	FIG00823077: hypothetical protein	30	30	1	312	8581				509	1004	965	re01.peg.5312_5311	re02.peg.286_7467	re03.peg.3576_17802	re05.peg.5296_33759	re06.peg.2360_37388	re07.peg.2257_44470	re08.peg.3849_52234	re09.peg.5192_60074	re14.peg.1368_97197	re15.peg.2136_104787	re17.peg.2883_121789	re18.peg.5690_131525	re19.peg.1309_133855	re20.peg.6131_144905	re22.peg.1834_154626	re04.peg.3974_25279	re10.peg.5295_66870	re11.peg.4217_74941	re12.peg.2838_82324	re13.peg.1488_90120	re16.peg.6144_118078	re21.peg.4625_150701	rq23.peg.1422_168001	rq24.peg.5701_179039	rq25.peg.4029_183825	rq26.peg.3614_190138	rq27.peg.510_194314	rq28.peg.7488_207713	re30.peg.5658_165327	rq29.peg.411_209131
34	group_10188	Sorbitol-6-phosphate 2-dehydrogenase	30	30	1	312	29395				635	902	744	re01.peg.5642_5641	re02.peg.2946_10127	re03.peg.2625_16851	re05.peg.425_28888	re06.peg.5787_40813	re07.peg.489_42702	re08.peg.320_48705	re09.peg.1245_56127	re14.peg.5384_101213	re15.peg.7801_110452	re17.peg.3024_121930	re18.peg.200_126036	re19.peg.5301_137847	re20.peg.1694_140468	re22.peg.6065_158857	re04.peg.6744_28049	re10.peg.1883_63458	re11.peg.2676_73400	re12.peg.3427_82913	re13.peg.1337_89969	re16.peg.687_112621	re21.peg.3508_149584	rq23.peg.5661_172240	rq24.peg.858_174196	rq25.peg.1199_180995	rq26.peg.4667_191191	rq27.peg.2573_196377	rq28.peg.6417_206642	re30.peg.4176_163845	rq29.peg.2832_211552
35	group_10191	pyridoxal phosphate-dependent deaminase putative	30	30	1	312	29411				653	944	934	re01.peg.5653_5652	re02.peg.2956_10137	re03.peg.2635_16861	re05.peg.415_28878	re06.peg.655_35683	re07.peg.478_42691	re08.peg.309_48694	re09.peg.1235_56117	re14.peg.5394_101223	re15.peg.7813_110464	re17.peg.3034_121940	re18.peg.190_126026	re19.peg.5311_137857	re20.peg.1704_140478	re22.peg.6075_158867	re04.peg.5248_26553	re10.peg.1870_63445	re11.peg.2666_73390	re12.peg.3413_82899	re13.peg.1326_89958	re16.peg.697_112631	re21.peg.3497_149573	rq23.peg.5671_172250	rq24.peg.848_174186	rq25.peg.1209_181005	rq26.peg.4677_191201	rq27.peg.2563_196367	rq28.peg.2273_202499	re30.peg.4186_163855	rq29.peg.2822_211542
36	group_10192	Putative hydrolase in cluster with formaldehyde/S-nitrosomycothiol reductase MscR	30	30	1	312	29422				458	779	622	re01.peg.5669_5668	re02.peg.2966_10147	re03.peg.2646_16872	re05.peg.407_28870	re06.peg.664_35692	re07.peg.470_42683	re08.peg.299_48684	re09.peg.1227_56109	re14.peg.5404_101233	re15.peg.7833_110484	re17.peg.3041_121947	re18.peg.179_126015	re19.peg.5322_137868	re20.peg.1714_140488	re22.peg.6083_158875	re04.peg.5255_26560	re10.peg.1861_63436	re11.peg.2659_73383	re12.peg.3406_82892	re13.peg.1318_89950	re16.peg.704_112638	re21.peg.3490_149566	rq23.peg.5678_172257	rq24.peg.841_174179	rq25.peg.1216_181012	rq26.peg.4685_191209	rq27.peg.2556_196360	rq28.peg.2266_202492	re30.peg.4194_163863	rq29.peg.2815_211535
37	group_10198	hypothetical protein	30	30	1	312	29497				707	893	871	re01.peg.5721_5720	re02.peg.3013_10194	re03.peg.2689_16915	re05.peg.365_28828	re06.peg.1022_36050	re07.peg.429_42642	re08.peg.256_48641	re09.peg.1184_56066	re14.peg.5448_101277	re15.peg.7899_110550	re17.peg.3083_121989	re18.peg.135_125971	re19.peg.5364_137910	re20.peg.1756_140530	re22.peg.6125_158917	re04.peg.5296_26601	re10.peg.1806_63381	re11.peg.2607_73331	re12.peg.3353_82839	re13.peg.1278_89910	re16.peg.757_112691	re21.peg.3448_149524	rq23.peg.5720_172299	rq24.peg.799_174137	rq25.peg.1259_181055	rq26.peg.4727_191251	rq27.peg.2515_196319	rq28.peg.2217_202443	re30.peg.4236_163905	rq29.peg.2773_211493
38	group_10199	Transcriptional regulator TetR family	30	30	1	312	29512				431	668	652	re01.peg.5728_5727	re02.peg.3020_10201	re03.peg.2696_16922	re05.peg.358_28821	re06.peg.1029_36057	re07.peg.422_42635	re08.peg.249_48634	re09.peg.1177_56059	re14.peg.5455_101284	re15.peg.7907_110558	re17.peg.3090_121996	re18.peg.128_125964	re19.peg.5371_137917	re20.peg.1763_140537	re22.peg.6132_158924	re04.peg.5303_26608	re10.peg.1795_63370	re11.peg.2598_73322	re12.peg.3342_82828	re13.peg.1271_89903	re16.peg.764_112698	re21.peg.3441_149517	rq23.peg.5727_172306	rq24.peg.792_174130	rq25.peg.1266_181062	rq26.peg.4735_191259	rq27.peg.2508_196312	rq28.peg.2209_202435	re30.peg.4243_163912	rq29.peg.2766_211486
39	group_10201	Transcriptional regulator PobR AraC family	30	30	1	312	29515				716	896	837	re01.peg.5731_5730	re02.peg.3023_10204	re03.peg.2699_16925	re05.peg.355_28818	re06.peg.1032_36060	re07.peg.419_42632	re08.peg.246_48631	re09.peg.1174_56056	re14.peg.5458_101287	re15.peg.7912_110563	re17.peg.3093_121999	re18.peg.125_125961	re19.peg.5374_137920	re20.peg.1766_140540	re22.peg.6135_158927	re04.peg.5306_26611	re10.peg.1792_63367	re11.peg.2593_73317	re12.peg.5145_84631	re13.peg.1268_89900	re16.peg.767_112701	re21.peg.3438_149514	rq23.peg.5730_172309	rq24.peg.789_174127	rq25.peg.1269_181065	rq26.peg.4738_191262	rq27.peg.2505_196309	rq28.peg.2205_202431	re30.peg.4246_163915	rq29.peg.2763_211483
40	group_10204	putative lipase	30	30	1	312	29539				1124	1328	1318	re01.peg.5745_5744	re02.peg.3036_10217	re03.peg.2711_16937	re05.peg.343_28806	re06.peg.1044_36072	re07.peg.407_42620	re08.peg.234_48619	re09.peg.1162_56044	re14.peg.5468_101297	re15.peg.7926_110577	re17.peg.3106_122012	re18.peg.113_125949	re19.peg.5386_137932	re20.peg.1778_140552	re22.peg.6147_158939	re04.peg.5319_26624	re10.peg.1775_63350	re11.peg.2577_73301	re12.peg.5130_84616	re13.peg.1255_89887	re16.peg.780_112714	re21.peg.3425_149501	rq23.peg.5743_172322	rq24.peg.776_174114	rq25.peg.1282_181078	rq26.peg.4752_191276	rq27.peg.2491_196295	rq28.peg.2190_202416	re30.peg.4260_163929	rq29.peg.2750_211470
41	group_10218	Lactate-responsive regulator LldR in Actinobacteria GntR family	30	30	1	312	25908				440	716	692	re01.peg.5807_5806	re02.peg.4140_11321	re03.peg.3816_18042	re05.peg.5946_34409	re06.peg.822_35850	re07.peg.2805_45018	re08.peg.4933_53318	re09.peg.2595_57477	re14.peg.3963_99792	re15.peg.5867_108518	re17.peg.4706_123612	re18.peg.5852_131687	re19.peg.3915_136461	re20.peg.6040_144814	re22.peg.4686_157478	re04.peg.4346_25651	re10.peg.6267_67842	re11.peg.6786_77510	re12.peg.4531_84017	re13.peg.497_89129	re16.peg.3686_115620	re21.peg.5280_151356	rq23.peg.4162_170741	rq24.peg.5980_179318	rq25.peg.5474_185270	rq26.peg.6893_193417	rq27.peg.6015_199819	rq28.peg.4746_204972	re30.peg.2836_162505	rq29.peg.6382_215102
42	group_10223	POSSIBLE MEMBRANE PROTEIN	30	30	1	312	25937				644	938	755	re01.peg.5824_5823	re02.peg.4121_11302	re03.peg.3834_18060	re05.peg.5964_34427	re06.peg.805_35833	re07.peg.2822_45035	re08.peg.4916_53301	re09.peg.2577_57459	re14.peg.3980_99809	re15.peg.5890_108541	re17.peg.4724_123630	re18.peg.5835_131670	re19.peg.3933_136479	re20.peg.6058_144832	re22.peg.4704_157496	re04.peg.4365_25670	re10.peg.8509_70084	re11.peg.6764_77488	re12.peg.4504_83990	re13.peg.479_89111	re16.peg.3704_115638	re21.peg.5262_151338	rq23.peg.4180_170759	rq24.peg.5962_179300	rq25.peg.5456_185252	rq26.peg.6874_193398	rq27.peg.5997_199801	rq28.peg.4725_204951	re30.peg.2854_162523	rq29.peg.6364_215084
43	group_10229	Oxidoreductase short-chain dehydrogenase/reductase family	30	30	1	312	25953				170	830	801	re01.peg.5832_5831	re02.peg.4111_11292	re03.peg.3842_18068	re05.peg.5974_34437	re06.peg.797_35825	re07.peg.2830_45043	re08.peg.4908_53293	re09.peg.2569_57451	re14.peg.3988_99817	re15.peg.5902_108553	re17.peg.4732_123638	re18.peg.2550_128386	re19.peg.3941_136487	re20.peg.6066_144840	re22.peg.4712_157504	re04.peg.4373_25678	re10.peg.7118_68693	re11.peg.7917_78641	re12.peg.6983_86469	re13.peg.471_89103	re16.peg.3712_115646	re21.peg.5250_151326	rq23.peg.4188_170767	rq24.peg.5954_179292	rq25.peg.5448_185244	rq26.peg.6866_193390	rq27.peg.5989_199793	rq28.peg.4715_204941	re30.peg.2862_162531	rq29.peg.6356_215076
44	group_10234	Substrate-binding region of ABC-type glycine betaine transport system	30	30	1	312	25956				812	884	874	re01.peg.5834_5833	re02.peg.4108_11289	re03.peg.3844_18070	re05.peg.5976_34439	re06.peg.795_35823	re07.peg.2832_45045	re08.peg.4906_53291	re09.peg.2567_57449	re14.peg.3990_99819	re15.peg.5905_108556	re17.peg.4734_123640	re18.peg.2548_128384	re19.peg.3943_136489	re20.peg.6068_144842	re22.peg.4714_157506	re04.peg.4375_25680	re10.peg.7116_68691	re11.peg.7914_78638	re12.peg.6981_86467	re13.peg.469_89101	re16.peg.3714_115648	re21.peg.5248_151324	rq23.peg.4190_170769	rq24.peg.5952_179290	rq25.peg.5446_185242	rq26.peg.6864_193388	rq27.peg.5987_199791	rq28.peg.4712_204938	re30.peg.2864_162533	rq29.peg.6354_215074
45	group_10235	FIG00999580: hypothetical protein	30	30	1	312	26011				269	497	366	re01.peg.5865_5864	re02.peg.4071_11252	re03.peg.3875_18101	re05.peg.6295_34758	re06.peg.5747_40773	re07.peg.2863_45076	re08.peg.4875_53260	re09.peg.2536_57418	re14.peg.4021_99850	re15.peg.5949_108600	re17.peg.4766_123672	re18.peg.2518_128354	re19.peg.3974_136520	re20.peg.6101_144875	re22.peg.4745_157537	re04.peg.4407_25712	re10.peg.7886_69461	re11.peg.7522_78246	re12.peg.7714_87200	re13.peg.437_89069	re16.peg.3746_115680	re21.peg.5338_151414	rq23.peg.4222_170801	rq24.peg.5921_179259	rq25.peg.5414_185210	rq26.peg.6244_192768	rq27.peg.5955_199759	rq28.peg.4672_204898	re30.peg.2896_162565	rq29.peg.6322_215042
46	group_10238	Nicotinamidase	30	30	1	312	19725				632	656	646	re01.peg.6015_6014	re02.peg.6454_13635	re03.peg.413_14639	re05.peg.4755_33218	re06.peg.5521_40548	re07.peg.5753_47966	re08.peg.5612_53997	re09.peg.2797_57679	re14.peg.3743_99572	re15.peg.5544_108195	re17.peg.6224_125130	re18.peg.3912_129747	re19.peg.3690_136236	re20.peg.5842_144616	re22.peg.4464_157256	re04.peg.4978_26283	re10.peg.8499_70074	re11.peg.7132_77856	re12.peg.8207_87693	re13.peg.3160_91792	re16.peg.653_112587	re21.peg.5444_151520	rq23.peg.3966_170545	rq24.peg.340_173678	rq25.peg.5268_185064	rq26.peg.7064_193588	rq27.peg.4310_198114	rq28.peg.6964_207189	re30.peg.2530_162199	rq29.peg.4288_213008
47	group_10250	Transcriptional regulator PadR family	30	30	1	312	19646				371	638	609	re01.peg.6055_6054	re02.peg.6421_13602	re03.peg.442_14668	re05.peg.4788_33251	re06.peg.5493_40520	re07.peg.5783_47996	re08.peg.5641_54026	re09.peg.2826_57708	re14.peg.3714_99543	re15.peg.5497_108148	re17.peg.5827_124733	re18.peg.3881_129716	re19.peg.3661_136207	re20.peg.5814_144588	re22.peg.4435_157227	re04.peg.4948_26253	re10.peg.3942_65517	re11.peg.1543_72267	re12.peg.3547_83033	re13.peg.3131_91763	re16.peg.625_112559	re21.peg.5473_151549	rq23.peg.3936_170515	rq24.peg.6175_179513	rq25.peg.5239_185035	rq26.peg.4179_190703	rq27.peg.4281_198085	rq28.peg.5189_205414	re30.peg.2501_162170	rq29.peg.4330_213050
48	group_10251	Transcriptional regulator TetR family	30	30	1	312	19632				245	695	577	re01.peg.6060_6059	re02.peg.6415_13596	re03.peg.446_14672	re05.peg.4793_33256	re06.peg.5489_40516	re07.peg.5787_48000	re08.peg.5645_54030	re09.peg.2831_57713	re14.peg.3710_99539	re15.peg.5491_108142	re17.peg.5822_124728	re18.peg.3877_129712	re19.peg.3657_136203	re20.peg.5809_144583	re22.peg.4430_157222	re04.peg.4943_26248	re10.peg.3935_65510	re11.peg.1537_72261	re12.peg.3554_83040	re13.peg.3127_91759	re16.peg.621_112555	re21.peg.5477_151553	rq23.peg.3932_170511	rq24.peg.6179_179517	rq25.peg.5235_185031	rq26.peg.4175_190699	rq27.peg.4277_198081	rq28.peg.5184_205409	re30.peg.2497_162166	rq29.peg.4334_213054
49	group_10254	3-ketoacyl-CoA thiolase @ Acetyl-CoA acetyltransferase	30	30	1	312	28481				668	1130	1102	re01.peg.6183_6182	re02.peg.2638_9819	re03.peg.2352_16578	re05.peg.726_29189	re06.peg.4733_39760	re07.peg.761_42974	re08.peg.594_48979	re09.peg.1507_56389	re14.peg.5127_100956	re15.peg.7404_110055	re17.peg.5221_124127	re18.peg.505_126341	re19.peg.5011_137557	re20.peg.1396_140170	re22.peg.5804_158596	re04.peg.5184_26489	re10.peg.607_62182	re11.peg.679_71403	re12.peg.5047_84533	re13.peg.5942_94574	re16.peg.2057_113991	re21.peg.683_146759	rq23.peg.5387_171966	rq24.peg.1148_174486	rq25.peg.938_180734	rq26.peg.2765_189289	rq27.peg.2934_196738	rq28.peg.5294_205519	re30.peg.3916_163585	rq29.peg.2025_210745
50	group_10257	Acyl dehydratase	30	30	1	312	28467				317	452	434	re01.peg.6192_6191	re02.peg.2628_9809	re03.peg.2343_16569	re05.peg.735_29198	re06.peg.4742_39769	re07.peg.770_42983	re08.peg.603_48988	re09.peg.1516_56398	re14.peg.5118_100947	re15.peg.7390_110041	re17.peg.5212_124118	re18.peg.514_126350	re19.peg.5002_137548	re20.peg.1387_140161	re22.peg.5795_158587	re04.peg.5175_26480	re10.peg.620_62195	re11.peg.666_71390	re12.peg.5061_84547	re13.peg.5951_94583	re16.peg.2048_113982	re21.peg.674_146750	rq23.peg.5378_171957	rq24.peg.1157_174495	rq25.peg.929_180725	rq26.peg.2773_189297	rq27.peg.2943_196747	rq28.peg.5305_205530	re30.peg.3908_163577	rq29.peg.2016_210736
51	group_10289	amino acid ABC transporter permease protein (glnP)	30	30	1	312	20514				296	956	923	re01.peg.6405_6404	re02.peg.5688_12869	re03.peg.3182_17408	re05.peg.5647_34110	re06.peg.6626_41652	re07.peg.5318_47531	re08.peg.4533_52918	re09.peg.3356_58238	re14.peg.3204_99033	re15.peg.4752_107403	re17.peg.4396_123302	re18.peg.5068_130903	re19.peg.3140_135686	re20.peg.5217_143991	re22.peg.3858_156650	re04.peg.4837_26142	re10.peg.4021_65596	re11.peg.2940_73664	re12.peg.2337_81823	re13.peg.6107_94739	re16.peg.3860_115794	re21.peg.4261_150337	rq23.peg.3399_169978	rq24.peg.6033_179371	rq25.peg.6245_186041	rq26.peg.3245_189769	rq27.peg.3732_197536	rq28.peg.4215_204441	re30.peg.1911_161580	rq29.peg.1614_210334
52	group_10300	4-carboxymuconolactone decarboxylase domain/alkylhydroperoxidase AhpD family core domain protein	30	30	1	312	17516				395	524	458	re01.peg.6538_6537	re02.peg.1129_8310	re03.peg.4890_19116	re05.peg.3089_31552	re06.peg.6760_41786	re07.peg.5696_47909	re08.peg.5439_53824	re09.peg.80_54962	re14.peg.561_96390	re15.peg.832_103483	re17.peg.571_119477	re18.peg.4424_130259	re19.peg.511_133057	re20.peg.2842_141616	re22.peg.975_153767	re04.peg.583_21888	re10.peg.8605_70180	re11.peg.6727_77451	re12.peg.8417_87903	re13.peg.2116_90748	re16.peg.3908_115842	re21.peg.1396_147472	rq23.peg.617_167196	rq24.peg.25_173363	rq25.peg.3454_183250	rq26.peg.3397_189921	rq27.peg.1351_195155	rq28.peg.3865_204091	re30.peg.2741_162410	rq29.peg.735_209455
53	group_10305	putative serine protease	30	30	1	312	6521				596	1253	1149	re01.peg.6598_6597	re02.peg.1167_8348	re03.peg.3277_17503	re05.peg.3125_31588	re06.peg.3540_38567	re07.peg.5224_47437	re08.peg.4152_52537	re09.peg.125_55007	re14.peg.516_96345	re15.peg.767_103418	re17.peg.2313_121219	re18.peg.5602_131437	re19.peg.476_133022	re20.peg.2796_141570	re22.peg.928_153720	re04.peg.5100_26405	re10.peg.8481_70056	re11.peg.5129_75853	re12.peg.8210_87696	re13.peg.2483_91115	re16.peg.925_112859	re21.peg.6219_152295	rq23.peg.559_167138	rq24.peg.5139_178477	rq25.peg.4749_184545	rq26.peg.424_186948	rq27.peg.1385_195189	rq28.peg.3992_204218	re30.peg.564_160233	rq29.peg.3837_212557
54	group_10319	MCE-family protein Mce1D	30	30	1	312	15973				890	1304	1271	re01.peg.6638_6637	re02.peg.737_7918	re03.peg.6524_20750	re05.peg.2709_31172	re06.peg.4562_39589	re07.peg.5857_48070	re08.peg.1666_50051	re09.peg.5605_60487	re14.peg.937_96766	re15.peg.1553_104204	re17.peg.192_119098	re18.peg.1640_127476	re19.peg.889_133435	re20.peg.3258_142032	re22.peg.1428_154220	re04.peg.196_21501	re10.peg.918_62493	re11.peg.6282_77006	re12.peg.630_80116	re13.peg.1725_90357	re16.peg.2780_114714	re21.peg.5821_151897	rq23.peg.987_167566	rq24.peg.5262_178600	rq25.peg.3093_182889	rq26.peg.1320_187844	rq27.peg.944_194748	rq28.peg.813_201039	re30.peg.5225_164894	rq29.peg.4997_213717
55	group_10330	Transcriptional regulator TetR family	30	30	1	312	26490				596	668	637	re01.peg.6680_6679	re02.peg.5389_12570	re03.peg.2156_16382	re05.peg.1593_30056	re06.peg.2527_37554	re07.peg.3061_45274	re08.peg.5834_54219	re09.peg.2347_57229	re14.peg.4210_100039	re15.peg.6207_108858	re17.peg.3514_122420	re18.peg.2322_128158	re19.peg.4155_136701	re20.peg.556_139330	re22.peg.4932_157724	re04.peg.2895_24200	re10.peg.5277_66852	re11.peg.4197_74921	re12.peg.6248_85734	re13.peg.3185_91817	re16.peg.2321_114255	re21.peg.6381_152457	rq23.peg.4495_171074	rq24.peg.3640_176978	rq25.peg.140_179936	rq26.peg.2090_188614	rq27.peg.5770_199574	rq28.peg.1485_201711	re30.peg.3090_162759	rq29.peg.1716_210436
56	group_10349	serine/threonine protein kinase	30	30	1	312	8281				530	2534	2224	re01.peg.6887_6886	re02.peg.137_7318	re03.peg.14_14240	re05.peg.5432_33895	re06.peg.5608_40635	re07.peg.2390_44603	re08.peg.6164_54549	re09.peg.5061_59943	re14.peg.1499_97328	re15.peg.2324_104975	re17.peg.3013_121919	re18.peg.4920_130755	re19.peg.1442_133988	re20.peg.6277_145051	re22.peg.1965_154757	re04.peg.5806_27111	re10.peg.5907_67482	re11.peg.4501_75225	re12.peg.4948_84434	re13.peg.1350_89982	re16.peg.6007_117941	re21.peg.4488_150564	rq23.peg.1559_168138	rq24.peg.4424_177762	rq25.peg.3889_183685	rq26.peg.3750_190274	rq27.peg.376_194180	rq28.peg.7088_207313	re30.peg.5802_165471	rq29.peg.550_209270
57	group_10360	FIG00997099: hypothetical protein	30	30	1	312	31185				374	410	378	re01.peg.6930_6929	re02.peg.1811_8992	re03.peg.3063_17289	re05.peg.3814_32277	6666666.340933.peg.309_35337	re07.peg.4167_46380	re08.peg.2905_51290	re09.peg.682_55564	re14.peg.5951_101780	re15.peg.8622_111273	re17.peg.5584_124490	re18.peg.2039_127875	re19.peg.5859_138405	re20.peg.2228_141002	re22.peg.6609_159401	re04.peg.5863_27168	re10.peg.5913_67488	re11.peg.5268_75992	re12.peg.5010_84496	re13.peg.6671_95303	re16.peg.1230_113164	re21.peg.2729_148805	rq23.peg.6283_172862	rq24.peg.3494_176832	rq25.peg.2009_181805	rq26.peg.6703_193227	rq27.peg.1993_195797	rq28.peg.5620_205845	re30.peg.4888_164557	rq29.peg.1772_210492
58	group_10365	FIG00996298: hypothetical protein	30	30	1	312	8485				221	1016	940	re01.peg.5262_5261	re02.peg.236_7417	re03.peg.3533_17759	re05.peg.5343_33806	re06.peg.2402_37430	re07.peg.2301_44514	re08.peg.3891_52276	re09.peg.5150_60032	re14.peg.1411_97240	re15.peg.2198_104849	re17.peg.2926_121832	re18.peg.5643_131478	re19.peg.1353_133899	re20.peg.6181_144955	re22.peg.1877_154669	re04.peg.6001_27306	re10.peg.5365_66940	re11.peg.4276_75000	re12.peg.2908_82394	re13.peg.1438_90070	re16.peg.6095_118029	re21.peg.4575_150651	rq23.peg.1471_168050	rq24.peg.5749_179087	rq25.peg.3978_183774	rq26.peg.3662_190186	rq27.peg.462_194266	rq28.peg.5498_205723	re30.peg.5713_165382	rq29.peg.462_209182
59	group_1037	7 8-didemethyl-8-hydroxy-5-deazariboflavin synthase subunit 1 / 7 8-didemethyl-8-hydroxy-5-deazariboflavin synthase subunit 2	30	30	1	312	26055				278	2594	2404	re01.peg.5013_5012	re02.peg.4043_11224	re03.peg.2317_16543	re05.peg.1763_30226	re06.peg.2107_37135	re07.peg.2889_45102	re08.peg.4979_53364	re09.peg.2510_57392	re14.peg.4047_99876	re15.peg.5982_108633	re17.peg.3352_122258	re18.peg.2491_128327	re19.peg.4000_136546	re20.peg.377_139151	re22.peg.4771_157563	re04.peg.2728_24033	re10.peg.5774_67349	re11.peg.4642_75366	re12.peg.5970_85456	re13.peg.3351_91983	re16.peg.2164_114098	re21.peg.5350_151426	rq23.peg.4248_170827	rq24.peg.5895_179233	rq25.peg.5387_185183	rq26.peg.7048_193572	rq27.peg.5929_199733	rq28.peg.7559_207784	re30.peg.2921_162590	rq29.peg.143_208863
60	group_10437	putative phosphotransferase	30	30	1	312	29461				482	1034	985	re01.peg.5688_5687	re02.peg.2989_10170	re03.peg.2666_16892	re05.peg.388_28851	re06.peg.684_35712	re07.peg.452_42665	re08.peg.279_48664	re09.peg.1207_56089	re14.peg.5425_101254	re15.peg.7862_110513	re17.peg.3060_121966	re18.peg.158_125994	re19.peg.5341_137887	re20.peg.1733_140507	re22.peg.6102_158894	re04.peg.5274_26579	re10.peg.1834_63409	re11.peg.2635_73359	re12.peg.3379_82865	re13.peg.1301_89933	re16.peg.723_112657	re21.peg.3471_149547	rq23.peg.5697_172276	rq24.peg.822_174160	rq25.peg.1235_181031	rq26.peg.4704_191228	rq27.peg.2537_196341	rq28.peg.2242_202468	re30.peg.4213_163882	rq29.peg.2796_211516
61	group_10478	FIG00761799: membrane protein	30	30	1	312	26186				698	1427	1177	re01.peg.4957_4956	re02.peg.3989_11170	re03.peg.2264_16490	re05.peg.1712_30175	re06.peg.2156_37184	re07.peg.2942_45155	re08.peg.5029_53414	re09.peg.2461_57343	re14.peg.4100_99929	re15.peg.6051_108702	re17.peg.3400_122306	re18.peg.2442_128278	re19.peg.4049_136595	re20.peg.439_139213	re22.peg.4822_157614	re04.peg.2778_24083	re10.peg.5835_67410	re11.peg.4583_75307	re12.peg.7396_86882	re13.peg.3303_91935	re16.peg.2213_114147	re21.peg.5398_151474	rq23.peg.4298_170877	rq24.peg.3534_176872	rq25.peg.5338_185134	rq26.peg.6820_193344	rq27.peg.5880_199684	rq28.peg.1351_201577	re30.peg.2973_162642	rq29.peg.193_208913
62	group_10484	Ribulose-5-phosphate 4-epimerase and related epimerases and aldolases	30	30	1	312	30456				215	719	677	re01.peg.4287_4287	re02.peg.4804_11985	re03.peg.5253_19479	re05.peg.6255_34718	re06.peg.2080_37108	re07.peg.51_42264	re08.peg.4658_53043	re09.peg.768_55650	re14.peg.5865_101694	re15.peg.8498_111149	re17.peg.6321_125227	re18.peg.6108_131943	re19.peg.5774_138320	re20.peg.2142_140916	re22.peg.6494_159286	re04.peg.5515_26820	re10.peg.6550_68125	re11.peg.3752_74476	re12.peg.5483_84969	re13.peg.5642_94274	re16.peg.1719_113653	re21.peg.6187_152263	rq23.peg.6199_172778	rq24.peg.3929_177267	rq25.peg.4524_184320	rq26.peg.339_186863	rq27.peg.2077_195881	rq28.peg.2725_202951	re30.peg.4803_164472	rq29.peg.5890_214610
63	group_10544	probable myosin	30	30	1	312	19750				704	1058	1008	re01.peg.6968_6967	re02.peg.6854_14035	re03.peg.467_14693	re05.peg.6373_34836	re06.peg.1459_36487	re07.peg.5960_48173	re08.peg.5602_53987	re09.peg.2787_57669	re14.peg.3753_99582	re15.peg.5565_108216	re17.peg.6672_125578	re18.peg.6514_132349	re19.peg.3700_136246	re20.peg.5852_144626	re22.peg.4474_157266	re04.peg.6851_28156	re10.peg.8902_70477	re11.peg.8410_79134	re12.peg.8831_88317	re13.peg.2247_90879	re16.peg.6325_118259	re21.peg.5314_151390	rq23.peg.3976_170555	rq24.peg.3700_177038	rq25.peg.5278_185074	rq26.peg.6948_193472	rq27.peg.4320_198124	rq28.peg.8011_208236	re30.peg.2540_162209	rq29.peg.4278_212998
64	group_10547	Translation initiation factor 2	30	30	1	312	24311				1190	2963	2577	re01.peg.3031_3031	re02.peg.6863_14044	re03.peg.5614_19840	re05.peg.5117_33580	re06.peg.1855_36883	re07.peg.1966_44179	re08.peg.5350_53735	re09.peg.4024_58906	re14.peg.2535_98364	re15.peg.3791_106442	re17.peg.2182_121088	re18.peg.6524_132359	re19.peg.2484_135030	re20.peg.4535_143309	re22.peg.3152_155944	re04.peg.1426_22731	re10.peg.8888_70463	re11.peg.8455_79179	re12.peg.8857_88343	re13.peg.4998_93630	re16.peg.4159_116093	re21.peg.2555_148631	rq23.peg.2746_169325	rq24.peg.2440_175778	rq25.peg.3607_183403	rq26.peg.973_187497	rq27.peg.5059_198863	rq28.peg.3511_203737	re30.peg.1263_160932	rq29.peg.5455_214175
65	group_10628	FIG00994135: hypothetical protein	30	30	1	312	18919				377	776	719	re01.peg.1979_1979	re02.peg.6170_13351	re03.peg.4898_19124	re05.peg.4224_32687	re06.peg.5162_40189	re07.peg.4491_46704	re08.peg.3305_51690	re09.peg.3178_58060	re14.peg.3383_99212	re15.peg.5035_107686	re17.peg.4920_123826	re18.peg.5264_131099	re19.peg.3320_135866	re20.peg.5468_144242	re22.peg.4096_156888	re04.peg.1257_22562	re10.peg.4936_66511	re11.peg.6650_77374	re12.peg.896_80382	re13.peg.2693_91325	re16.peg.6776_118710	re21.peg.2018_148094	rq23.peg.3580_170159	rq24.peg.4214_177552	rq25.peg.4928_184724	rq26.peg.5948_192472	rq27.peg.3919_197723	rq28.peg.2522_202748	re30.peg.2115_161784	rq29.peg.4257_212977
66	group_10671	putative esterase	30	30	1	312	6136				740	983	957	re01.peg.1473_1473	re02.peg.1373_8554	re03.peg.1039_15265	re05.peg.3356_31819	re06.peg.3737_38764	re07.peg.3817_46030	re08.peg.5532_53917	re09.peg.308_55190	re14.peg.309_96138	re15.peg.491_103142	re17.peg.2498_121404	re18.peg.2650_128486	re19.peg.304_132850	re20.peg.2604_141378	re22.peg.745_153537	re04.peg.3782_25087	re10.peg.3215_64790	re11.peg.3442_74166	re12.peg.2268_81754	re13.peg.5179_93811	re16.peg.1485_113419	re21.peg.4090_150166	rq23.peg.320_166899	rq24.peg.3084_176422	rq25.peg.1638_181434	rq26.peg.622_187146	rq27.peg.1582_195386	rq28.peg.1655_201881	re30.peg.364_160033	rq29.peg.3432_212152
67	group_10686	Uroporphyrinogen III decarboxylase	30	30	1	312	24840				956	1211	1019	re01.peg.2810_2810	re02.peg.5938_13119	re03.peg.4334_18560	re05.peg.4355_32818	re06.peg.1442_36470	re07.peg.5420_47633	re08.peg.2025_50410	re09.peg.3801_58683	re14.peg.2764_98593	re15.peg.4125_106776	re17.peg.4612_123518	re18.peg.6461_132296	re19.peg.2704_135250	re20.peg.4781_143555	re22.peg.3376_156168	re04.peg.5347_26652	re10.peg.5539_67114	re11.peg.8025_78749	re12.peg.8121_87607	re13.peg.1078_89710	re16.peg.3233_115167	re21.peg.2889_148965	rq23.peg.2962_169541	rq24.peg.2223_175561	rq25.peg.3821_183617	rq26.peg.5784_192308	rq27.peg.4844_198648	rq28.peg.363_200589	re30.peg.1472_161141	rq29.peg.4114_212834
68	group_10749	Enoyl-CoA hydratase	30	30	1	312	28490				644	908	812	re01.peg.6177_6176	re02.peg.2644_9825	re03.peg.2358_16584	re05.peg.720_29183	re06.peg.4727_39754	re07.peg.755_42968	re08.peg.588_48973	re09.peg.1501_56383	re14.peg.5133_100962	re15.peg.7411_110062	re17.peg.5227_124133	re18.peg.499_126335	re19.peg.5017_137563	re20.peg.1402_140176	re22.peg.5810_158602	re04.peg.5190_26495	re10.peg.598_62173	re11.peg.687_71411	re12.peg.5039_84525	re13.peg.5936_94568	re16.peg.2063_113997	re21.peg.689_146765	rq23.peg.5393_171972	rq24.peg.1142_174480	rq25.peg.944_180740	rq26.peg.2759_189283	rq27.peg.2928_196732	rq28.peg.5288_205513	re30.peg.3922_163591	rq29.peg.2031_210751
69	group_10770	Cell division protein FtsI [Peptidoglycan synthetase]	30	30	1	312	24152				224	1814	1572	re01.peg.3107_3107	re02.peg.2527_9708	re03.peg.5536_19762	re05.peg.2376_30839	re06.peg.6554_41580	re07.peg.1889_44102	re08.peg.5255_53640	re09.peg.4100_58982	re14.peg.2459_98288	re15.peg.3684_106335	re17.peg.2256_121162	re18.peg.3098_128933	re19.peg.2408_134954	re20.peg.4463_143237	re22.peg.3075_155867	re04.peg.1510_22815	re10.peg.1986_63561	re11.peg.3544_74268	re12.peg.2469_81955	re13.peg.4915_93547	re16.peg.4242_116176	re21.peg.2998_149074	rq23.peg.2671_169250	rq24.peg.2513_175851	rq25.peg.3533_183329	rq26.peg.1047_187571	rq27.peg.5134_198938	rq28.peg.5691_205916	re30.peg.1189_160858	rq29.peg.5381_214101
70	group_10813	probable transcriptional regulator TetR family	30	30	1	312	28306				545	683	625	re01.peg.69_69	re02.peg.3306_10487	re03.peg.888_15114	re05.peg.803_29266	re06.peg.4819_39846	re07.peg.838_43051	re08.peg.685_49070	re09.peg.1597_56479	re14.peg.5049_100878	re15.peg.7304_109955	re17.peg.4844_123750	re18.peg.597_126433	re19.peg.4932_137478	re20.peg.1304_140078	re22.peg.5713_158505	re04.peg.2443_23748	re10.peg.2758_64333	re11.peg.566_71290	re12.peg.3514_83000	re13.peg.3980_92612	re16.peg.1960_113894	re21.peg.596_146672	rq23.peg.5298_171877	rq24.peg.1240_174578	rq25.peg.860_180656	rq26.peg.2844_189368	rq27.peg.3013_196817	rq28.peg.6065_206290	re30.peg.3838_163507	rq29.peg.3977_212697
71	group_10816	gamma-BHC dehydrochlorinase	30	30	1	312	28280				509	515	512	re01.peg.79_79	re02.peg.3320_10501	re03.peg.898_15124	re05.peg.813_29276	re06.peg.4829_39856	re07.peg.849_43062	re08.peg.695_49080	re09.peg.1608_56490	re14.peg.5038_100867	re15.peg.7288_109939	re17.peg.4854_123760	re18.peg.607_126443	re19.peg.4921_137467	re20.peg.1292_140066	re22.peg.5701_158493	re04.peg.2432_23737	re10.peg.2776_64351	re11.peg.1769_72493	re12.peg.1073_80559	re13.peg.3991_92623	re16.peg.1948_113882	re21.peg.585_146661	rq23.peg.5288_171867	rq24.peg.1250_174588	rq25.peg.849_180645	rq26.peg.2855_189379	rq27.peg.3023_196827	rq28.peg.6050_206275	re30.peg.3827_163496	rq29.peg.3967_212687
72	group_10817	FIG00994670: hypothetical protein	30	30	1	312	28248				830	881	875	re01.peg.85_85	re02.peg.3326_10507	re03.peg.904_15130	re05.peg.819_29282	re06.peg.4835_39862	re07.peg.855_43068	re08.peg.701_49086	re09.peg.1614_56496	re14.peg.5032_100861	re15.peg.7279_109930	re17.peg.4860_123766	re18.peg.615_126451	re19.peg.4915_137461	re20.peg.1286_140060	re22.peg.5695_158487	re04.peg.2426_23731	re10.peg.2786_64361	re11.peg.1777_72501	re12.peg.1081_80567	re13.peg.3997_92629	re16.peg.1942_113876	re21.peg.578_146654	rq23.peg.5282_171861	rq24.peg.1256_174594	rq25.peg.843_180639	rq26.peg.2877_189401	rq27.peg.3029_196833	rq28.peg.6043_206268	re30.peg.3806_163475	rq29.peg.3961_212681
73	group_10818	POSSIBLE LINOLEOYL-CoA DESATURASE (DELTA(6)-DESATURASE)	30	30	1	312	28238				341	1220	1170	re01.peg.90_90	re02.peg.3331_10512	re03.peg.909_15135	re05.peg.824_29287	re06.peg.4840_39867	re07.peg.860_43073	re08.peg.704_49089	re09.peg.1617_56499	re14.peg.5027_100856	re15.peg.7270_109921	re17.peg.4865_123771	re18.peg.618_126454	re19.peg.4910_137456	re20.peg.1283_140057	re22.peg.5690_158482	re04.peg.2421_23726	re10.peg.2796_64371	re11.peg.1785_72509	re12.peg.1088_80574	re13.peg.4002_92634	re16.peg.1937_113871	re21.peg.573_146649	rq23.peg.5277_171856	rq24.peg.1261_174599	rq25.peg.838_180634	rq26.peg.2881_189405	rq27.peg.3034_196838	rq28.peg.6038_206263	re30.peg.3802_163471	rq29.peg.3956_212676
74	group_10824	Aldo-keto reductase	30	30	1	312	28176				836	1103	1010	re01.peg.125_125	re02.peg.3365_10546	re03.peg.942_15168	re05.peg.857_29320	re06.peg.4874_39901	re07.peg.894_43107	re08.peg.736_49121	re09.peg.1652_56534	re14.peg.4995_100824	re15.peg.7224_109875	re17.peg.4899_123805	re18.peg.652_126488	re19.peg.4877_137423	re20.peg.1250_140024	re22.peg.5657_158449	re04.peg.2387_23692	re10.peg.6_61581	re11.peg.1826_72550	re12.peg.1134_80620	re13.peg.4037_92669	re16.peg.1903_113837	re21.peg.539_146615	rq23.peg.5243_171822	rq24.peg.1295_174633	rq25.peg.804_180600	rq26.peg.2914_189438	rq27.peg.3068_196872	rq28.peg.6001_206226	re30.peg.3768_163437	rq29.peg.3923_212643
75	group_10828	Alkyldihydroxyacetonephosphate synthase	30	30	1	312	28108				965	1613	1587	re01.peg.150_150	re02.peg.3395_10576	re03.peg.520_14746	re05.peg.882_29345	re06.peg.4900_39927	re07.peg.921_43134	re08.peg.762_49147	re09.peg.1678_56560	re14.peg.4969_100798	re15.peg.7186_109837	re17.peg.1180_120086	re18.peg.678_126514	re19.peg.4850_137396	re20.peg.1226_140000	re22.peg.5622_158414	re04.peg.2361_23666	re10.peg.55_61630	re11.peg.1854_72578	re12.peg.1185_80671	re13.peg.4753_93385	re16.peg.6677_118611	re21.peg.515_146591	rq23.peg.5203_171782	rq24.peg.1333_174671	rq25.peg.779_180575	rq26.peg.297_186821	rq27.peg.3094_196898	rq28.peg.6260_206485	re30.peg.3742_163411	rq29.peg.3184_211904
76	group_10832	probable transcriptional regulator TetR family	30	30	1	312	28084				518	722	687	re01.peg.160_160	re02.peg.3405_10586	re03.peg.530_14756	re05.peg.892_29355	re06.peg.4910_39937	re07.peg.931_43144	re08.peg.772_49157	re09.peg.1689_56571	re14.peg.4958_100787	re15.peg.7173_109824	re17.peg.1190_120096	re18.peg.690_126526	re19.peg.4838_137384	re20.peg.1216_139990	re22.peg.5612_158404	re04.peg.2351_23656	re10.peg.66_61641	re11.peg.1865_72589	re12.peg.1200_80686	re13.peg.4743_93375	re16.peg.6667_118601	re21.peg.505_146581	rq23.peg.5193_171772	rq24.peg.1343_174681	rq25.peg.769_180565	rq26.peg.287_186811	rq27.peg.3104_196908	rq28.peg.6243_206468	re30.peg.3732_163401	rq29.peg.3194_211914
77	group_10834	acyl CoA synthetase AMP-binding protein	30	30	1	312	28083				1259	1637	1593	re01.peg.163_163	re02.peg.3408_10589	re03.peg.533_14759	re05.peg.895_29358	re06.peg.4913_39940	re07.peg.934_43147	re08.peg.775_49160	re09.peg.1692_56574	re14.peg.4955_100784	re15.peg.7169_109820	re17.peg.1191_120097	re18.peg.693_126529	re19.peg.4835_137381	re20.peg.1213_139987	re22.peg.5609_158401	re04.peg.2350_23655	re10.peg.67_61642	re11.peg.1866_72590	re12.peg.1202_80688	re13.peg.4742_93374	re16.peg.6666_118600	re21.peg.504_146580	rq23.peg.5192_171771	rq24.peg.1344_174682	rq25.peg.768_180564	rq26.peg.286_186810	rq27.peg.3105_196909	rq28.peg.6242_206467	re30.peg.3731_163400	rq29.peg.3195_211915
78	group_10835	DNA polymerase	30	30	1	312	28075				680	725	684	re01.peg.185_185	re02.peg.3413_10594	re03.peg.542_14768	re05.peg.904_29367	re06.peg.4918_39945	re07.peg.939_43152	re08.peg.784_49169	re09.peg.1703_56585	re14.peg.4946_100775	re15.peg.7154_109805	re17.peg.1194_120100	re18.peg.698_126534	re19.peg.4830_137376	re20.peg.1208_139982	re22.peg.5598_158390	re04.peg.2347_23652	re10.peg.71_61646	re11.peg.1871_72595	re12.peg.1205_80691	re13.peg.4739_93371	re16.peg.6663_118597	re21.peg.501_146577	rq23.peg.5189_171768	rq24.peg.1347_174685	rq25.peg.765_180561	rq26.peg.283_186807	rq27.peg.3108_196912	rq28.peg.6239_206464	re30.peg.3728_163397	rq29.peg.3198_211918
79	group_10841	Glycerol-3-phosphate ABC transporter permease protein UgpE (TC 3.A.1.1.3)	30	30	1	312	27974				485	902	882	re01.peg.209_209	re02.peg.3443_10624	re03.peg.567_14793	re05.peg.930_29393	re06.peg.4942_39969	re07.peg.963_43176	re08.peg.808_49193	re09.peg.1727_56609	re14.peg.4922_100751	re15.peg.7115_109766	re17.peg.1219_120125	re18.peg.724_126560	re19.peg.4805_137351	re20.peg.1183_139957	re22.peg.5573_158365	re04.peg.2323_23628	re10.peg.107_61682	re11.peg.1901_72625	re12.peg.872_80358	re13.peg.4715_93347	re16.peg.6639_118573	re21.peg.477_146553	rq23.peg.5165_171744	rq24.peg.1372_174710	rq25.peg.741_180537	rq26.peg.258_186782	rq27.peg.3132_196936	rq28.peg.6211_206436	re30.peg.3704_163373	rq29.peg.3222_211942
80	group_10842	putative lyase	30	30	1	312	27967				386	419	409	re01.peg.215_215	re02.peg.3449_10630	re03.peg.573_14799	re05.peg.936_29399	re06.peg.4948_39975	re07.peg.969_43182	re08.peg.814_49199	re09.peg.1733_56615	re14.peg.4916_100745	re15.peg.7108_109759	re17.peg.1225_120131	re18.peg.730_126566	re19.peg.4799_137345	re20.peg.1177_139951	re22.peg.5567_158359	re04.peg.2317_23622	re10.peg.114_61689	re11.peg.1908_72632	re12.peg.863_80349	re13.peg.4709_93341	re16.peg.6633_118567	re21.peg.471_146547	rq23.peg.5159_171738	rq24.peg.1378_174716	rq25.peg.735_180531	rq26.peg.252_186776	rq27.peg.3138_196942	rq28.peg.6202_206427	re30.peg.3698_163367	rq29.peg.3228_211948
81	group_10853	probable transcription regulator	30	30	1	312	27781				182	659	615	re01.peg.278_278	re02.peg.3531_10712	re03.peg.652_14878	re05.peg.1013_29476	re06.peg.5026_40053	re07.peg.1024_43237	re08.peg.889_49274	re09.peg.1790_56672	re14.peg.4839_100668	re15.peg.6998_109649	re17.peg.1272_120178	re18.peg.780_126616	re19.peg.4721_137267	re20.peg.1112_139886	re22.peg.5490_158282	re04.peg.6233_27538	re10.peg.208_61783	re11.peg.2151_72875	re12.peg.769_80255	re13.peg.4665_93297	re16.peg.6579_118513	re21.peg.406_146482	rq23.peg.5110_171689	rq24.peg.1428_174766	rq25.peg.685_180481	rq26.peg.199_186723	rq27.peg.3183_196987	rq28.peg.3304_203530	re30.peg.3647_163316	rq29.peg.3277_211997
82	group_10856	Dolichol-phosphate mannosyltransferase in lipid-linked oligosaccharide synthesis cluster	30	30	1	312	27778				260	494	470	re01.peg.281_281	re02.peg.3535_10716	re03.peg.655_14881	re05.peg.1017_29480	re06.peg.5029_40056	re07.peg.1027_43240	re08.peg.892_49277	re09.peg.1793_56675	re14.peg.4836_100665	re15.peg.6994_109645	re17.peg.1275_120181	re18.peg.783_126619	re19.peg.4718_137264	re20.peg.1109_139883	re22.peg.5487_158279	re04.peg.6230_27535	re10.peg.213_61788	re11.peg.2147_72871	re12.peg.764_80250	re13.peg.4662_93294	re16.peg.6576_118510	re21.peg.403_146479	rq23.peg.5107_171686	rq24.peg.1431_174769	rq25.peg.682_180478	rq26.peg.196_186720	rq27.peg.3186_196990	rq28.peg.3301_203527	re30.peg.3644_163313	rq29.peg.3280_212000
83	group_10858	Hydride transferase 1 (Fragment)	30	30	1	312	27741				266	845	814	re01.peg.299_299	re02.peg.3553_10734	re03.peg.672_14898	re05.peg.1035_29498	re06.peg.3283_38310	re07.peg.1045_43258	re08.peg.909_49294	re09.peg.1811_56693	re14.peg.4819_100648	re15.peg.6973_109624	re17.peg.1294_120200	re18.peg.801_126637	re19.peg.4700_137246	re20.peg.1091_139865	re22.peg.5469_158261	re04.peg.3300_24605	re10.peg.235_61810	re11.peg.2126_72850	re12.peg.743_80229	re13.peg.4647_93279	re16.peg.4955_116889	re21.peg.386_146462	rq23.peg.5092_171671	rq24.peg.1447_174785	rq25.peg.664_180460	rq26.peg.179_186703	rq27.peg.3203_197007	rq28.peg.3280_203506	re30.peg.3627_163296	rq29.peg.4661_213381
84	group_10862	FIG01329746: membrane protein	30	30	1	312	27675				1145	1784	1734	re01.peg.333_333	re02.peg.3590_10771	re03.peg.708_14934	re05.peg.1069_29532	re06.peg.3249_38276	re07.peg.1078_43291	re08.peg.942_49327	re09.peg.1844_56726	re14.peg.4786_100615	re15.peg.6933_109584	re17.peg.1327_120233	re18.peg.837_126673	re19.peg.4667_137213	re20.peg.1058_139832	re22.peg.5436_158228	re04.peg.3333_24638	re10.peg.278_61853	re11.peg.2087_72811	re12.peg.692_80178	re13.peg.4613_93245	re16.peg.4922_116856	re21.peg.352_146428	rq23.peg.5059_171638	rq24.peg.1480_174818	rq25.peg.630_180426	rq26.peg.146_186670	rq27.peg.3236_197040	rq28.peg.3244_203470	re30.peg.3594_163263	rq29.peg.4695_213415
85	group_10866	FIG00820565: hypothetical protein	30	30	1	312	27670				272	422	382	re01.peg.335_335	re02.peg.3592_10773	re03.peg.710_14936	re05.peg.1071_29534	re06.peg.3247_38274	re07.peg.1080_43293	re08.peg.944_49329	re09.peg.1846_56728	re14.peg.4784_100613	re15.peg.6930_109581	re17.peg.1329_120235	re18.peg.839_126675	re19.peg.4665_137211	re20.peg.1056_139830	re22.peg.5434_158226	re04.peg.3335_24640	re10.peg.282_61857	re11.peg.2085_72809	re12.peg.687_80173	re13.peg.4611_93243	re16.peg.4920_116854	re21.peg.350_146426	rq23.peg.5057_171636	rq24.peg.1482_174820	rq25.peg.628_180424	rq26.peg.144_186668	rq27.peg.3238_197042	rq28.peg.3241_203467	re30.peg.3592_163261	rq29.peg.4697_213417
86	group_10867	Amidophosphoribosyltransferase	30	30	1	312	27669				1013	1577	1552	re01.peg.336_336	re02.peg.3593_10774	re03.peg.711_14937	re05.peg.1072_29535	re06.peg.3246_38273	re07.peg.1081_43294	re08.peg.945_49330	re09.peg.1847_56729	re14.peg.4783_100612	re15.peg.6929_109580	re17.peg.1330_120236	re18.peg.840_126676	re19.peg.4664_137210	re20.peg.1055_139829	re22.peg.5433_158225	re04.peg.3336_24641	re10.peg.283_61858	re11.peg.2084_72808	re12.peg.686_80172	re13.peg.4610_93242	re16.peg.4919_116853	re21.peg.349_146425	rq23.peg.5056_171635	rq24.peg.1483_174821	rq25.peg.627_180423	rq26.peg.143_186667	rq27.peg.3239_197043	rq28.peg.3240_203466	re30.peg.3591_163260	rq29.peg.4698_213418
87	group_10870	Phosphoribosylformylglycinamidine cyclo-ligase	30	30	1	312	27660				953	1250	1085	re01.peg.340_340	re02.peg.3598_10779	re03.peg.715_14941	re05.peg.1076_29539	re06.peg.3242_38269	re07.peg.1085_43298	re08.peg.949_49334	re09.peg.1852_56734	re14.peg.4779_100608	re15.peg.6924_109575	re17.peg.1334_120240	re18.peg.845_126681	re19.peg.4660_137206	re20.peg.1051_139825	re22.peg.5429_158221	re04.peg.3340_24645	re10.peg.289_61864	re11.peg.2079_72803	re12.peg.682_80168	re13.peg.4606_93238	re16.peg.4915_116849	re21.peg.345_146421	rq23.peg.5052_171631	rq24.peg.1487_174825	rq25.peg.623_180419	rq26.peg.139_186663	rq27.peg.3243_197047	rq28.peg.3236_203462	re30.peg.3587_163256	rq29.peg.4702_213422
88	group_10881	Phosphate transport system permease protein PstC (TC 3.A.1.7.1)	30	30	1	312	27614				974	1091	1037	re01.peg.360_360	re02.peg.6654_13835	re03.peg.734_14960	re05.peg.1096_29559	re06.peg.3222_38249	re07.peg.1105_43318	re08.peg.970_49355	re09.peg.1872_56754	re14.peg.4758_100587	re15.peg.6899_109550	re17.peg.1354_120260	re18.peg.865_126701	re19.peg.4639_137185	re20.peg.1030_139804	re22.peg.5408_158200	re04.peg.3360_24665	re10.peg.317_61892	re11.peg.2052_72776	re12.peg.648_80134	re13.peg.4586_93218	re16.peg.4895_116829	re21.peg.324_146400	rq23.peg.5031_171610	rq24.peg.1507_174845	rq25.peg.603_180399	rq26.peg.118_186642	rq27.peg.3263_197067	rq28.peg.3209_203435	re30.peg.3567_163236	rq29.peg.4722_213442
89	group_10882	probable transcriptional regulator TetR family	30	30	1	312	27567				437	548	540	re01.peg.384_384	re02.peg.6630_13811	re03.peg.757_14983	re05.peg.1118_29581	re06.peg.3198_38225	re07.peg.1128_43341	re08.peg.993_49378	re09.peg.1895_56777	re14.peg.4733_100562	re15.peg.6868_109519	re17.peg.1378_120284	re18.peg.889_126725	re19.peg.4615_137161	re20.peg.1006_139780	re22.peg.5385_158177	re04.peg.3384_24689	re10.peg.657_62232	re11.peg.7645_78369	re12.peg.3878_83364	re13.peg.4563_93195	re16.peg.4872_116806	re21.peg.300_146376	rq23.peg.5007_171586	rq24.peg.1531_174869	rq25.peg.577_180373	rq26.peg.93_186617	rq27.peg.3287_197091	rq28.peg.3184_203410	re30.peg.3543_163212	rq29.peg.4746_213466
90	group_10883	Transcriptional regulator ArsR family	30	30	1	312	27422				311	320	313	re01.peg.409_409	re02.peg.3607_10788	re03.peg.782_15008	re05.peg.1143_29606	re06.peg.2953_37980	re07.peg.1154_43367	re08.peg.1018_49403	re09.peg.1920_56802	re14.peg.4639_100468	re15.peg.6827_109478	re17.peg.1404_120310	re18.peg.915_126751	re19.peg.4590_137136	re20.peg.981_139755	re22.peg.5360_158152	re04.peg.3414_24719	re10.peg.700_62275	re11.peg.6224_76948	re12.peg.3836_83322	re13.peg.4535_93167	re16.peg.4844_116778	re21.peg.272_146348	rq23.peg.4924_171503	rq24.peg.1559_174897	rq25.peg.549_180345	rq26.peg.65_186589	rq27.peg.3315_197119	rq28.peg.3151_203377	re30.peg.3515_163184	rq29.peg.4773_213493
91	group_10884	Hydantoin permease	30	30	1	312	27417				908	1574	1551	re01.peg.412_412	re02.peg.3610_10791	re03.peg.785_15011	re05.peg.1146_29609	re06.peg.2950_37977	re07.peg.1157_43370	re08.peg.1021_49406	re09.peg.1923_56805	re14.peg.4636_100465	re15.peg.6824_109475	re17.peg.1407_120313	re18.peg.918_126754	re19.peg.4587_137133	re20.peg.978_139752	re22.peg.5357_158149	re04.peg.3417_24722	re10.peg.703_62278	re11.peg.6227_76951	re12.peg.3833_83319	re13.peg.4532_93164	re16.peg.4841_116775	re21.peg.269_146345	rq23.peg.4921_171500	rq24.peg.1562_174900	rq25.peg.546_180342	rq26.peg.62_186586	rq27.peg.3318_197122	rq28.peg.3148_203374	re30.peg.3512_163181	rq29.peg.4776_213496
92	group_10887	Putative oxidoreductase YncB	30	30	1	312	27399				575	1007	988	re01.peg.422_422	re02.peg.3623_10804	re03.peg.798_15024	re05.peg.1159_29622	re06.peg.2940_37967	re07.peg.1169_43382	re08.peg.1034_49419	re09.peg.1936_56818	re14.peg.4623_100452	re15.peg.6806_109457	re17.peg.1415_120321	re18.peg.931_126767	re19.peg.4575_137121	re20.peg.970_139744	re22.peg.5347_158139	re04.peg.3427_24732	re10.peg.715_62290	re11.peg.6235_76959	re12.peg.3821_83307	re13.peg.4524_93156	re16.peg.4832_116766	re21.peg.258_146334	rq23.peg.4913_171492	rq24.peg.1570_174908	rq25.peg.538_180334	rq26.peg.388_186912	rq27.peg.3326_197130	rq28.peg.3139_203365	re30.peg.3504_163173	rq29.peg.4784_213504
93	group_10892	transcriptional regulator MerR family	30	30	1	312	27379				614	788	751	re01.peg.442_442	re02.peg.3636_10817	re03.peg.812_15038	re05.peg.1175_29638	re06.peg.2928_37955	re07.peg.1181_43394	re08.peg.1049_49434	re09.peg.1947_56829	re14.peg.4610_100439	re15.peg.6784_109435	re17.peg.1427_120333	re18.peg.943_126779	re19.peg.4562_137108	re20.peg.955_139729	re22.peg.5335_158127	re04.peg.3440_24745	re10.peg.731_62306	re11.peg.2323_73047	re12.peg.2526_82012	re13.peg.4513_93145	re16.peg.4820_116754	re21.peg.246_146322	rq23.peg.4900_171479	rq24.peg.1583_174921	rq25.peg.526_180322	rq26.peg.376_186900	rq27.peg.3338_197142	rq28.peg.2482_202708	re30.peg.3492_163161	rq29.peg.4797_213517
94	group_10893	conserved hypothetical protein	30	30	1	312	27371				260	659	610	re01.peg.444_444	re02.peg.3638_10819	re03.peg.1743_15969	re05.peg.1177_29640	re06.peg.2926_37953	re07.peg.1183_43396	re08.peg.1051_49436	re09.peg.1949_56831	re14.peg.4608_100437	re15.peg.6777_109428	re17.peg.1429_120335	re18.peg.947_126783	re19.peg.4560_137106	re20.peg.953_139727	re22.peg.5333_158125	re04.peg.3442_24747	re10.peg.734_62309	re11.peg.2327_73051	re12.peg.2531_82017	re13.peg.4511_93143	re16.peg.4818_116752	re21.peg.244_146320	rq23.peg.4898_171477	rq24.peg.1585_174923	rq25.peg.524_180320	rq26.peg.1689_188213	rq27.peg.3340_197144	rq28.peg.2480_202706	re30.peg.3490_163159	rq29.peg.4580_213300
95	group_10894	hypothetical protein	30	30	1	312	27354				494	515	498	re01.peg.451_451	re02.peg.3645_10826	re03.peg.1750_15976	re05.peg.1184_29647	re06.peg.2919_37946	re07.peg.1190_43403	re08.peg.1058_49443	re09.peg.1957_56839	re14.peg.4601_100430	re15.peg.6767_109418	re17.peg.1436_120342	re18.peg.955_126791	re19.peg.4553_137099	re20.peg.946_139720	re22.peg.5326_158118	re04.peg.3449_24754	re10.peg.744_62319	re11.peg.2338_73062	re12.peg.2541_82027	re13.peg.4504_93136	re16.peg.4810_116744	re21.peg.237_146313	rq23.peg.4891_171470	rq24.peg.1593_174931	rq25.peg.517_180313	rq26.peg.1696_188220	rq27.peg.3347_197151	rq28.peg.2470_202696	re30.peg.3483_163152	rq29.peg.4573_213293
96	group_10897	hypothetical protein	30	30	1	312	27271				311	461	381	re01.peg.494_494	re02.peg.3686_10867	re03.peg.1790_16016	re05.peg.1225_29688	re06.peg.2881_37908	re07.peg.1228_43441	re08.peg.1096_49481	re09.peg.1995_56877	re14.peg.4563_100392	re15.peg.6716_109367	re17.peg.1476_120382	re18.peg.994_126830	re19.peg.4514_137060	re20.peg.908_139682	re22.peg.5288_158080	re04.peg.2927_24232	re10.peg.798_62373	re11.peg.2389_73113	re12.peg.2599_82085	re13.peg.4464_93096	re16.peg.4770_116704	re21.peg.196_146272	rq23.peg.4851_171430	rq24.peg.1633_174971	rq25.peg.476_180272	rq26.peg.1737_188261	rq27.peg.3388_197192	rq28.peg.2423_202649	re30.peg.3443_163112	rq29.peg.4533_213253
97	group_10900	transcriptional regulator AraC family protein	30	30	1	312	27211				143	1010	926	re01.peg.506_506	re02.peg.3696_10877	re03.peg.1801_16027	re05.peg.1237_29700	re06.peg.2870_37897	re07.peg.1239_43452	re08.peg.1108_49493	re09.peg.2005_56887	re14.peg.4553_100382	re15.peg.6702_109353	re17.peg.1487_120393	re18.peg.1007_126843	re19.peg.4504_137050	re20.peg.895_139669	re22.peg.5278_158070	re04.peg.2941_24246	re10.peg.809_62384	re11.peg.2402_73126	re12.peg.2611_82097	re13.peg.4453_93085	re16.peg.4759_116693	re21.peg.185_146261	rq23.peg.4840_171419	rq24.peg.1645_174983	rq25.peg.465_180261	rq26.peg.1749_188273	rq27.peg.3399_197203	rq28.peg.2413_202639	re30.peg.3431_163100	rq29.peg.4522_213242
98	group_10901	FIG00997388: hypothetical protein	30	30	1	312	27207				578	641	584	re01.peg.508_508	re02.peg.3698_10879	re03.peg.1803_16029	re05.peg.1239_29702	re06.peg.2868_37895	re07.peg.1241_43454	re08.peg.1110_49495	re09.peg.2007_56889	re14.peg.4551_100380	re15.peg.6699_109350	re17.peg.1489_120395	re18.peg.1009_126845	re19.peg.4502_137048	re20.peg.893_139667	re22.peg.5276_158068	re04.peg.2943_24248	re10.peg.813_62388	re11.peg.2405_73129	re12.peg.2616_82102	re13.peg.4451_93083	re16.peg.4757_116691	re21.peg.183_146259	rq23.peg.4838_171417	rq24.peg.1647_174985	rq25.peg.463_180259	rq26.peg.1751_188275	rq27.peg.3401_197205	rq28.peg.2410_202636	re30.peg.3429_163098	rq29.peg.4520_213240
99	group_10902	possible transcriptional regulator TetR family	30	30	1	312	27184				554	671	646	re01.peg.520_520	re02.peg.3711_10892	re03.peg.1815_16041	re05.peg.1251_29714	re06.peg.2855_37882	re07.peg.1253_43466	re08.peg.1122_49507	re09.peg.2019_56901	re14.peg.4539_100368	re15.peg.6682_109333	re17.peg.1501_120407	re18.peg.1021_126857	re19.peg.4490_137036	re20.peg.881_139655	re22.peg.5264_158056	re04.peg.2955_24260	re10.peg.830_62405	re11.peg.2421_73145	re12.peg.6510_85996	re13.peg.4439_93071	re16.peg.4745_116679	re21.peg.171_146247	rq23.peg.4826_171405	rq24.peg.1659_174997	rq25.peg.451_180247	rq26.peg.1763_188287	rq27.peg.3413_197217	rq28.peg.2395_202621	re30.peg.3417_163086	rq29.peg.4508_213228
100	group_10903	FIG00821400: hypothetical protein	30	30	1	312	27124				350	818	712	re01.peg.551_551	re02.peg.3747_10928	re03.peg.1845_16071	re05.peg.1282_29745	re06.peg.2825_37852	re07.peg.3357_45570	re08.peg.1152_49537	re09.peg.2050_56932	re14.peg.4509_100338	re15.peg.6635_109286	re17.peg.1532_120438	re18.peg.1052_126888	re19.peg.4460_137006	re20.peg.850_139624	re22.peg.5233_158025	re04.peg.2986_24291	re10.peg.870_62445	re11.peg.5749_76473	re12.peg.7691_87177	re13.peg.4408_93040	re16.peg.4714_116648	re21.peg.141_146217	rq23.peg.4796_171375	rq24.peg.1688_175026	rq25.peg.419_180215	rq26.peg.1792_188316	rq27.peg.3442_197246	rq28.peg.2362_202588	re30.peg.3387_163056	rq29.peg.4477_213197
101	group_10904	FIG00996410: hypothetical protein	30	30	1	312	27122				482	551	546	re01.peg.553_553	re02.peg.3749_10930	re03.peg.1847_16073	re05.peg.1284_29747	re06.peg.2823_37850	re07.peg.3355_45568	re08.peg.1154_49539	re09.peg.2052_56934	re14.peg.4507_100336	re15.peg.6632_109283	re17.peg.1534_120440	re18.peg.1055_126891	re19.peg.4458_137004	re20.peg.848_139622	re22.peg.5231_158023	re04.peg.2988_24293	re10.peg.873_62448	re11.peg.5753_76477	re12.peg.7694_87180	re13.peg.4406_93038	re16.peg.4712_116646	re21.peg.139_146215	rq23.peg.4794_171373	rq24.peg.1690_175028	rq25.peg.417_180213	rq26.peg.1794_188318	rq27.peg.3444_197248	rq28.peg.2360_202586	re30.peg.3385_163054	rq29.peg.4475_213195
102	group_10905	SSU ribosomal protein S10p (S20e)	30	30	1	312	22698				182	530	304	re01.peg.580_580	re02.peg.1892_9073	re03.peg.4617_18843	re05.peg.1786_30249	re06.peg.4270_39297	re07.peg.1296_43509	re08.peg.2926_51311	re09.peg.4665_59547	re14.peg.1893_97722	re15.peg.2826_105477	re17.peg.1156_120062	re18.peg.1693_127529	re19.peg.1836_134382	re20.peg.3896_142670	re22.peg.2362_155154	re04.peg.6180_27485	re10.peg.2982_64557	re11.peg.5689_76413	re12.peg.7440_86926	re13.peg.3028_91660	re16.peg.3149_115083	re21.peg.1337_147413	rq23.peg.1943_168522	rq24.peg.2778_176116	rq25.peg.6047_185843	rq26.peg.1676_188200	rq27.peg.5694_199498	rq28.peg.3408_203634	re30.peg.609_160278	rq29.peg.1472_210192
103	group_10906	LSU ribosomal protein L2p (L8e)	30	30	1	312	22707				161	836	761	re01.peg.584_584	re02.peg.1896_9077	re03.peg.4613_18839	re05.peg.1790_30253	re06.peg.4266_39293	re07.peg.1300_43513	re08.peg.2930_51315	re09.peg.4661_59543	re14.peg.1897_97726	re15.peg.2831_105482	re17.peg.1152_120058	re18.peg.1697_127533	re19.peg.1840_134386	re20.peg.3900_142674	re22.peg.2366_155158	re04.peg.6184_27489	re10.peg.2986_64561	re11.peg.5694_76418	re12.peg.7445_86931	re13.peg.3024_91656	re16.peg.3145_115079	re21.peg.1333_147409	rq23.peg.1947_168526	rq24.peg.2782_176120	rq25.peg.6051_185847	rq26.peg.1672_188196	rq27.peg.5690_199494	rq28.peg.3414_203640	re30.peg.613_160282	rq29.peg.1476_210196
104	group_10907	LSU ribosomal protein L17p	30	30	1	312	22743				230	557	538	re01.peg.611_611	re02.peg.1922_9103	re03.peg.4586_18812	re05.peg.1817_30280	re06.peg.4238_39265	re07.peg.1328_43541	re08.peg.2958_51343	re09.peg.4633_59515	re14.peg.1924_97753	re15.peg.2862_105513	re17.peg.1124_120030	re18.peg.1725_127561	re19.peg.1867_134413	re20.peg.3928_142702	re22.peg.2393_155185	re04.peg.6211_27516	re10.peg.3018_64593	re11.peg.5723_76447	re12.peg.7033_86519	re13.peg.2997_91629	re16.peg.3118_115052	re21.peg.1305_147381	rq23.peg.1974_168553	rq24.peg.2809_176147	rq25.peg.6078_185874	rq26.peg.1645_188169	rq27.peg.5662_199466	rq28.peg.3441_203667	re30.peg.640_160309	rq29.peg.1503_210223
105	group_10908	FIG00821870: hypothetical protein	30	30	1	312	22786				344	839	795	re01.peg.632_632	re02.peg.1943_9124	re03.peg.4549_18775	re05.peg.1837_30300	re06.peg.4217_39244	re07.peg.1347_43560	re08.peg.2978_51363	re09.peg.4613_59495	re14.peg.1944_97773	re15.peg.2892_105543	re17.peg.1104_120010	re18.peg.1746_127582	re19.peg.1887_134433	re20.peg.3948_142722	re22.peg.2421_155213	re04.peg.1852_23157	re10.peg.3048_64623	re11.peg.5062_75786	re12.peg.8189_87675	re13.peg.2956_91588	re16.peg.3083_115017	re21.peg.1286_147362	rq23.peg.1994_168573	rq24.peg.2828_176166	rq25.peg.6097_185893	rq26.peg.1625_188149	rq27.peg.5643_199447	rq28.peg.3483_203709	re30.peg.660_160329	rq29.peg.1523_210243
106	group_10909	FIG00996759: hypothetical protein	30	30	1	312	22810				206	560	512	re01.peg.644_644	re02.peg.1955_9136	re03.peg.4538_18764	re05.peg.1848_30311	re06.peg.4206_39233	re07.peg.1358_43571	re08.peg.2989_51374	re09.peg.4602_59484	re14.peg.1955_97784	re15.peg.2906_105557	re17.peg.1093_119999	re18.peg.1757_127593	re19.peg.1898_134444	re20.peg.3959_142733	re22.peg.2432_155224	re04.peg.1863_23168	re10.peg.3063_64638	re11.peg.5049_75773	re12.peg.8130_87616	re13.peg.2945_91577	re16.peg.3072_115006	re21.peg.1275_147351	rq23.peg.2006_168585	rq24.peg.2839_176177	rq25.peg.6108_185904	rq26.peg.1614_188138	rq27.peg.5632_199436	rq28.peg.3497_203723	re30.peg.671_160340	rq29.peg.1534_210254
107	group_10910	Sporulation regulatory protein WhiD	30	30	1	312	22821				140	296	277	re01.peg.652_652	re02.peg.1964_9145	re03.peg.4531_18757	re05.peg.1857_30320	re06.peg.6044_41070	re07.peg.1367_43580	re08.peg.2998_51383	re09.peg.4593_59475	re14.peg.1964_97793	re15.peg.2917_105568	re17.peg.1085_119991	re18.peg.1765_127601	re19.peg.1906_134452	re20.peg.3968_142742	re22.peg.2441_155233	re04.peg.1873_23178	re10.peg.5112_66687	re11.peg.5038_75762	re12.peg.7627_87113	re13.peg.2936_91568	re16.peg.3063_114997	re21.peg.1266_147342	rq23.peg.2015_168594	rq24.peg.2848_176186	rq25.peg.6117_185913	rq26.peg.1605_188129	rq27.peg.5624_199428	rq28.peg.7594_207819	re30.peg.680_160349	rq29.peg.1543_210263
108	group_10913	RNA polymerase sigma-70 factor	30	30	1	312	22825				470	578	532	re01.peg.654_654	re02.peg.1967_9148	re03.peg.4529_18755	re05.peg.1860_30323	re06.peg.6046_41072	re07.peg.1369_43582	re08.peg.3000_51385	re09.peg.4591_59473	re14.peg.1966_97795	re15.peg.2919_105570	re17.peg.1083_119989	re18.peg.1767_127603	re19.peg.1908_134454	re20.peg.3970_142744	re22.peg.2443_155235	re04.peg.1875_23180	re10.peg.5116_66691	re11.peg.5036_75760	re12.peg.7630_87116	re13.peg.2934_91566	re16.peg.3061_114995	re21.peg.1264_147340	rq23.peg.2017_168596	rq24.peg.2850_176188	rq25.peg.6119_185915	rq26.peg.1603_188127	rq27.peg.5622_199426	rq28.peg.7591_207816	re30.peg.682_160351	rq29.peg.1545_210265
109	group_10921	hypothetical protein	30	30	1	312	22906				122	122	122	re01.peg.706_706	re02.peg.2015_9196	re03.peg.1340_15566	re05.peg.1911_30374	re06.peg.6092_41118	re07.peg.1414_43627	re08.peg.3047_51432	re09.peg.4544_59426	re14.peg.2013_97842	re15.peg.2989_105640	re17.peg.1031_119937	re18.peg.1814_127650	re19.peg.1958_134504	re20.peg.4015_142789	re22.peg.2488_155280	re04.peg.1928_23233	re10.peg.5188_66763	re11.peg.6891_77615	re12.peg.8098_87584	re13.peg.5624_94256	re16.peg.3011_114945	re21.peg.1215_147291	rq23.peg.2070_168649	rq24.peg.2903_176241	rq25.peg.6170_185966	rq26.peg.4402_190926	rq27.peg.5570_199374	rq28.peg.4824_205050	re30.peg.736_160405	rq29.peg.878_209598
110	group_10923	possible rhodanese-related sulfurtransferase	30	30	1	312	22931				293	308	305	re01.peg.721_721	re02.peg.2029_9210	re03.peg.1327_15553	re05.peg.1924_30387	re06.peg.6105_41131	re07.peg.1427_43640	re08.peg.3060_51445	re09.peg.4531_59413	re14.peg.2026_97855	re15.peg.3010_105661	re17.peg.1017_119923	re18.peg.1828_127664	re19.peg.1971_134517	re20.peg.4028_142802	re22.peg.2501_155293	re04.peg.1942_23247	re10.peg.2186_63761	re11.peg.7286_78010	re12.peg.2822_82308	re13.peg.5610_94242	re16.peg.2996_114930	re21.peg.1200_147276	rq23.peg.2084_168663	rq24.peg.2918_176256	rq25.peg.4042_183838	rq26.peg.4417_190941	rq27.peg.5555_199359	rq28.peg.4840_205066	re30.peg.750_160419	rq29.peg.863_209583
111	group_10924	tRNA (cytidine(34)-2'-O)-methyltransferase	30	30	1	312	22948				404	596	511	re01.peg.729_729	re02.peg.2040_9221	re03.peg.1319_15545	re05.peg.1933_30396	re06.peg.6113_41139	re07.peg.1435_43648	re08.peg.3068_51453	re09.peg.4523_59405	re14.peg.2034_97863	re15.peg.3021_105672	re17.peg.1009_119915	re18.peg.1836_127672	re19.peg.1979_134525	re20.peg.4036_142810	re22.peg.2509_155301	re04.peg.1951_23256	re10.peg.2176_63751	re11.peg.7271_77995	re12.peg.2808_82294	re13.peg.5601_94233	re16.peg.2987_114921	re21.peg.1191_147267	rq23.peg.2093_168672	rq24.peg.2927_176265	rq25.peg.4051_183847	rq26.peg.4426_190950	rq27.peg.5546_199350	rq28.peg.4851_205077	re30.peg.760_160429	rq29.peg.854_209574
112	group_10928	Glyceraldehyde-3-phosphate ketol-isomerase	30	30	1	312	22996				776	884	869	re01.peg.752_752	re02.peg.2061_9242	re03.peg.1296_15522	re05.peg.1954_30417	re06.peg.6135_41161	re07.peg.1457_43670	re08.peg.3090_51475	re09.peg.4502_59384	re14.peg.2056_97885	re15.peg.3051_105702	re17.peg.987_119893	re18.peg.1857_127693	re19.peg.2000_134546	re20.peg.4058_142832	re22.peg.2530_155322	re04.peg.1976_23281	re10.peg.2153_63728	re11.peg.4807_75531	re12.peg.2779_82265	re13.peg.5572_94204	re16.peg.2965_114899	re21.peg.1159_147235	rq23.peg.2115_168694	rq24.peg.2949_176287	rq25.peg.4073_183869	rq26.peg.4448_190972	rq27.peg.5524_199328	rq28.peg.4874_205100	re30.peg.782_160451	rq29.peg.831_209551
113	group_10934	Transcriptional regulator MerR family	30	30	1	312	23133				491	563	529	re01.peg.820_820	re02.peg.2139_9320	re03.peg.1225_15451	re05.peg.2024_30487	re06.peg.6206_41232	re07.peg.1526_43739	re08.peg.3159_51544	re09.peg.4433_59315	re14.peg.2125_97954	re15.peg.3141_105792	re17.peg.918_119824	re18.peg.1929_127765	re19.peg.2071_134617	re20.peg.4127_142901	re22.peg.2617_155409	re04.peg.2047_23352	re10.peg.2066_63641	re11.peg.2716_73440	re12.peg.4121_83607	re13.peg.5505_94137	re16.peg.2896_114830	re21.peg.1090_147166	rq23.peg.2212_168791	rq24.peg.3018_176356	rq25.peg.4145_183941	rq26.peg.4515_191039	rq27.peg.5467_199271	rq28.peg.2962_203188	re30.peg.849_160518	rq29.peg.762_209482
114	group_10935	Xanthine dehydrogenase FAD binding subunit	30	30	1	312	23169				506	809	796	re01.peg.830_830	re02.peg.2152_9333	re03.peg.1215_15441	re05.peg.2034_30497	re06.peg.6216_41242	re07.peg.1534_43747	re08.peg.2342_50727	re09.peg.4424_59306	re14.peg.2135_97964	re15.peg.3156_105807	re17.peg.907_119813	re18.peg.1940_127776	re19.peg.2081_134627	re20.peg.4137_142911	re22.peg.2627_155419	re04.peg.2057_23362	re10.peg.2053_63628	re11.peg.2730_73454	re12.peg.4135_83621	re13.peg.5495_94127	re16.peg.2885_114819	re21.peg.1080_147156	rq23.peg.2222_168801	rq24.peg.3027_176365	rq25.peg.4155_183951	rq26.peg.4525_191049	rq27.peg.5458_199262	rq28.peg.2972_203198	re30.peg.859_160528	rq29.peg.752_209472
115	group_10936	membrane-flanked domain	30	30	1	312	23201				419	590	567	re01.peg.852_852	re02.peg.2177_9358	re03.peg.5425_19651	re05.peg.2056_30519	re06.peg.6238_41264	re07.peg.1556_43769	re08.peg.2364_50749	re09.peg.4403_59285	re14.peg.2157_97986	re15.peg.3187_105838	re17.peg.885_119791	re18.peg.1962_127798	re19.peg.2103_134649	re20.peg.4159_142933	re22.peg.2649_155441	re04.peg.3636_24941	re10.peg.7377_68952	re11.peg.2761_73485	re12.peg.4164_83650	re13.peg.5473_94105	re16.peg.3437_115371	re21.peg.1058_147134	rq23.peg.2244_168823	rq24.peg.3049_176387	rq25.peg.4177_183973	rq26.peg.4547_191071	rq27.peg.5436_199240	rq28.peg.2998_203224	re30.peg.881_160550	rq29.peg.3012_211732
116	group_10937	dTDP-4-dehydrorhamnose reductase	30	30	1	312	23220				839	941	843	re01.peg.865_865	re02.peg.2191_9372	re03.peg.5412_19638	re05.peg.2070_30533	re06.peg.6251_41277	re07.peg.1569_43782	re08.peg.2377_50762	re09.peg.4390_59272	re14.peg.2170_97999	re15.peg.3206_105857	re17.peg.872_119778	re18.peg.1975_127811	re19.peg.2116_134662	re20.peg.4172_142946	re22.peg.2662_155454	re04.peg.3622_24927	re10.peg.7360_68935	re11.peg.2777_73501	re12.peg.4183_83669	re13.peg.5460_94092	re16.peg.3424_115358	re21.peg.1045_147121	rq23.peg.2257_168836	rq24.peg.3062_176400	rq25.peg.4190_183986	rq26.peg.4560_191084	rq27.peg.5423_199227	rq28.peg.3012_203238	re30.peg.894_160563	rq29.peg.3025_211745
117	group_10941	LpqB	30	30	1	312	23260				848	1778	1709	re01.peg.889_889	re02.peg.2219_9400	re03.peg.5388_19614	re05.peg.2094_30557	re06.peg.6276_41302	re07.peg.1592_43805	re08.peg.2402_50787	re09.peg.4366_59248	re14.peg.2195_98024	re15.peg.3240_105891	re17.peg.849_119755	re18.peg.2000_127836	re19.peg.2139_134685	re20.peg.4196_142970	re22.peg.2686_155478	re04.peg.3598_24903	re10.peg.8046_69621	re11.peg.7936_78660	re12.peg.7830_87316	re13.peg.5437_94069	re16.peg.3400_115334	re21.peg.1022_147098	rq23.peg.2280_168859	rq24.peg.2753_176091	rq25.peg.4213_184009	rq26.peg.4582_191106	rq27.peg.5400_199204	rq28.peg.3037_203263	re30.peg.916_160585	rq29.peg.3048_211768
118	group_10943	POSSIBLE LINOLEOYL-CoA DESATURASE (DELTA(6)-DESATURASE)	30	30	1	312	23276				755	1241	1204	re01.peg.899_899	re02.peg.2232_9413	re03.peg.5378_19604	re05.peg.2104_30567	re06.peg.6288_41314	re07.peg.1602_43815	re08.peg.2412_50797	re09.peg.4356_59238	re14.peg.2205_98034	re15.peg.3260_105911	re17.peg.839_119745	re18.peg.2012_127848	re19.peg.2150_134696	re20.peg.4206_142980	re22.peg.2696_155488	re04.peg.3588_24893	re10.peg.7767_69342	re11.peg.7538_78262	re12.peg.7224_86710	re13.peg.5427_94059	re16.peg.3390_115324	re21.peg.1012_147088	rq23.peg.2290_168869	rq24.peg.2763_176101	rq25.peg.4223_184019	rq26.peg.4592_191116	rq27.peg.5390_199194	rq28.peg.3048_203274	re30.peg.926_160595	rq29.peg.3058_211778
119	group_10945	Chromosome (plasmid) partitioning protein ParA	30	30	1	312	23299				512	839	789	re01.peg.914_914	re02.peg.2248_9429	re03.peg.5363_19589	re05.peg.2119_30582	re06.peg.6303_41329	re07.peg.1617_43830	re08.peg.2427_50812	re09.peg.4341_59223	re14.peg.2220_98049	re15.peg.3279_105930	re17.peg.824_119730	re18.peg.2027_127863	re19.peg.2165_134711	re20.peg.4221_142995	re22.peg.2711_155503	re04.peg.3573_24878	re10.peg.7786_69361	re11.peg.7556_78280	re12.peg.7242_86728	re13.peg.5412_94044	re16.peg.3375_115309	re21.peg.997_147073	rq23.peg.2305_168884	rq24.peg.5559_178897	rq25.peg.4238_184034	rq26.peg.4607_191131	rq27.peg.5375_199179	rq28.peg.3065_203291	re30.peg.941_160610	rq29.peg.3073_211793
120	group_10957	NADH pyrophosphatase	30	30	1	312	23383				224	1022	887	re01.peg.943_943	re02.peg.2281_9462	re03.peg.5334_19560	re05.peg.2149_30612	re06.peg.6331_41357	re07.peg.1646_43859	re08.peg.2456_50841	re09.peg.4314_59196	re14.peg.2249_98078	re15.peg.3320_105971	re17.peg.796_119702	re18.peg.6241_132076	re19.peg.2193_134739	re20.peg.4250_143024	re22.peg.2740_155532	re04.peg.3545_24850	re10.peg.8176_69751	re11.peg.3360_74084	re12.peg.6132_85618	re13.peg.5384_94016	re16.peg.3347_115281	re21.peg.2618_148694	rq23.peg.2334_168913	rq24.peg.5531_178869	rq25.peg.4267_184063	rq26.peg.4636_191160	rq27.peg.5347_199151	rq28.peg.3100_203326	re30.peg.970_160639	rq29.peg.3102_211822
121	group_10958	ABC1 family protein	30	30	1	312	23390				878	1367	1264	re01.peg.947_947	re02.peg.2285_9466	re03.peg.5330_19556	re05.peg.2154_30617	re06.peg.6335_41361	re07.peg.1650_43863	re08.peg.2460_50845	re09.peg.4310_59192	re14.peg.2253_98082	re15.peg.3324_105975	re17.peg.792_119698	re18.peg.6245_132080	re19.peg.2197_134743	re20.peg.4254_143028	re22.peg.2744_155536	re04.peg.3541_24846	re10.peg.8171_69746	re11.peg.3365_74089	re12.peg.6136_85622	re13.peg.5380_94012	re16.peg.3343_115277	re21.peg.2613_148689	rq23.peg.2338_168917	rq24.peg.5527_178865	rq25.peg.4271_184067	rq26.peg.4640_191164	rq27.peg.5343_199147	rq28.peg.3105_203331	re30.peg.974_160643	rq29.peg.3106_211826
122	group_10969	possible membrane protein	30	30	1	312	23550				383	488	452	re01.peg.994_994	re02.peg.2336_9517	re03.peg.5284_19510	re05.peg.2202_30665	re06.peg.6382_41408	re07.peg.1696_43909	re08.peg.2507_50892	re09.peg.4263_59145	re14.peg.2299_98128	re15.peg.3392_106043	re17.peg.744_119650	re18.peg.5972_131807	re19.peg.2244_134790	re20.peg.4300_143074	re22.peg.2850_155642	re04.peg.3492_24797	re10.peg.6394_67969	re11.peg.3424_74148	re12.peg.5370_84856	re13.peg.5332_93964	re16.peg.3295_115229	re21.peg.2567_148643	rq23.peg.2449_169028	rq24.peg.5825_179163	rq25.peg.4318_184114	rq26.peg.5226_191750	rq27.peg.5297_199101	rq28.peg.5802_206027	re30.peg.1020_160689	rq29.peg.3156_211876
123	group_10972	Molybdenum cofactor biosynthesis protein MoaC / Molybdenum cofactor biosynthesis protein MoaB	30	30	1	312	23561				842	1046	985	re01.peg.1003_1003	re02.peg.2347_9528	re03.peg.5274_19500	re05.peg.2220_30683	re06.peg.6392_41418	re07.peg.1709_43922	re08.peg.2517_50902	re09.peg.4253_59135	re14.peg.2309_98138	re15.peg.3411_106062	re17.peg.735_119641	re18.peg.3255_129090	re19.peg.2253_134799	re20.peg.4309_143083	re22.peg.2860_155652	re04.peg.4282_25587	re10.peg.2831_64406	re11.peg.5943_76667	re12.peg.6585_86071	re13.peg.5323_93955	re16.peg.3286_115220	re21.peg.4858_150934	rq23.peg.2520_169099	rq24.peg.5834_179172	rq25.peg.4328_184124	rq26.peg.5239_191763	rq27.peg.5288_199092	rq28.peg.5792_206017	re30.peg.1033_160702	rq29.peg.3166_211886
124	group_10977	ABC transporter ATP-binding protein	30	30	1	312	23614				533	839	812	re01.peg.1028_1028	re02.peg.2372_9553	re03.peg.4503_18729	re05.peg.2247_30710	re06.peg.6417_41443	re07.peg.1734_43947	re08.peg.2542_50927	re09.peg.4228_59110	re14.peg.2332_98161	re15.peg.3444_106095	re17.peg.1616_120522	re18.peg.3229_129064	re19.peg.2279_134825	re20.peg.4334_143108	re22.peg.2883_155675	re04.peg.4257_25562	re10.peg.2865_64440	re11.peg.5914_76638	re12.peg.6610_86096	re13.peg.4788_93420	re16.peg.4583_116517	re21.peg.4884_150960	rq23.peg.2544_169123	rq24.peg.2643_175981	rq25.peg.4354_184150	rq26.peg.5264_191788	rq27.peg.5262_199066	rq28.peg.7322_207547	re30.peg.1058_160727	rq29.peg.1992_210712
125	group_10979	Methyltransferase	30	30	1	312	23659				716	878	835	re01.peg.1038_1038	re02.peg.2385_9566	re03.peg.4493_18719	re05.peg.2258_30721	re06.peg.6427_41453	re07.peg.1744_43957	re08.peg.2552_50937	re09.peg.4218_59100	re14.peg.2342_98171	re15.peg.3459_106110	re17.peg.1626_120532	re18.peg.3218_129053	re19.peg.2289_134835	re20.peg.4344_143118	re22.peg.2893_155685	re04.peg.4247_25552	re10.peg.2889_64464	re11.peg.5899_76623	re12.peg.8839_88325	re13.peg.4798_93430	re16.peg.4573_116507	re21.peg.4894_150970	rq23.peg.2554_169133	rq24.peg.2633_175971	rq25.peg.4364_184160	rq26.peg.5274_191798	rq27.peg.5252_199056	rq28.peg.7306_207531	re30.peg.1068_160737	rq29.peg.1982_210702
126	group_10980	Electron transfer flavoprotein beta subunit	30	30	1	312	23661				500	872	786	re01.peg.1039_1039	re02.peg.2386_9567	re03.peg.4492_18718	re05.peg.2259_30722	re06.peg.6428_41454	re07.peg.1745_43958	re08.peg.2553_50938	re09.peg.4217_59099	re14.peg.2343_98172	re15.peg.3460_106111	re17.peg.1627_120533	re18.peg.3217_129052	re19.peg.2290_134836	re20.peg.4345_143119	re22.peg.2894_155686	re04.peg.4246_25551	re10.peg.2890_64465	re11.peg.5898_76622	re12.peg.8840_88326	re13.peg.4799_93431	re16.peg.4572_116506	re21.peg.4895_150971	rq23.peg.2555_169134	rq24.peg.2632_175970	rq25.peg.4365_184161	rq26.peg.5275_191799	rq27.peg.5251_199055	rq28.peg.7305_207530	re30.peg.1069_160738	rq29.peg.1981_210701
127	group_10981	Electron transfer flavoprotein alpha subunit	30	30	1	312	23664				602	1079	947	re01.peg.1040_1040	re02.peg.2387_9568	re03.peg.4491_18717	re05.peg.2260_30723	re06.peg.6429_41455	re07.peg.1746_43959	re08.peg.2554_50939	re09.peg.4216_59098	re14.peg.2344_98173	re15.peg.3461_106112	re17.peg.1628_120534	re18.peg.3216_129051	re19.peg.2291_134837	re20.peg.4346_143120	re22.peg.2895_155687	re04.peg.4245_25550	re10.peg.2891_64466	re11.peg.5897_76621	re12.peg.8842_88328	re13.peg.4800_93432	re16.peg.4571_116505	re21.peg.4896_150972	rq23.peg.2556_169135	rq24.peg.2631_175969	rq25.peg.4366_184162	rq26.peg.5276_191800	rq27.peg.5250_199054	rq28.peg.7304_207529	re30.peg.1070_160739	rq29.peg.1980_210700
128	group_10986	Hydrolase MutT1	30	30	1	312	23873				794	1040	917	re01.peg.1078_1078	re02.peg.2432_9613	re03.peg.4451_18677	re05.peg.2300_30763	re06.peg.6469_41495	re07.peg.1785_43998	re08.peg.2595_50980	re09.peg.4177_59059	re14.peg.2383_98212	re15.peg.3514_106165	re17.peg.1666_120572	re18.peg.3176_129011	re19.peg.2331_134877	re20.peg.4386_143160	re22.peg.2935_155727	re04.peg.5797_27102	re10.peg.2942_64517	re11.peg.6730_77454	re12.peg.5591_85077	re13.peg.4839_93471	re16.peg.4319_116253	re21.peg.2922_148998	rq23.peg.2595_169174	rq24.peg.2591_175929	rq25.peg.4405_184201	rq26.peg.1124_187648	rq27.peg.5211_199015	rq28.peg.6879_207104	re30.peg.1110_160779	rq29.peg.1940_210660
129	group_10989	Uracil-DNA glycosylase family 1	30	30	1	312	23892				671	758	679	re01.peg.1087_1087	re02.peg.2442_9623	re03.peg.4442_18668	re05.peg.2309_30772	re06.peg.6478_41504	re07.peg.1794_44007	re08.peg.2604_50989	re09.peg.4168_59050	re14.peg.2392_98221	re15.peg.3527_106178	re17.peg.1675_120581	re18.peg.3167_129002	re19.peg.2340_134886	re20.peg.4395_143169	re22.peg.2944_155736	re04.peg.5788_27093	re10.peg.2951_64526	re11.peg.6739_77463	re12.peg.5604_85090	re13.peg.4848_93480	re16.peg.4310_116244	re21.peg.2931_149007	rq23.peg.2604_169183	rq24.peg.2582_175920	rq25.peg.4414_184210	rq26.peg.1115_187639	rq27.peg.5202_199006	rq28.peg.6889_207114	re30.peg.1120_160789	rq29.peg.1931_210651
130	group_10997	hypothetical protein	30	30	1	312	24052				644	746	729	re01.peg.1131_1131	re02.peg.2497_9678	re03.peg.5509_19735	re05.peg.2352_30815	re06.peg.6529_41555	re07.peg.1837_44050	re08.peg.2647_51032	re09.peg.4124_59006	re14.peg.2435_98264	re15.peg.3584_106235	re17.peg.1717_120623	re18.peg.3124_128959	re19.peg.2383_134929	re20.peg.4438_143212	re22.peg.2990_155782	re04.peg.5745_27050	re10.peg.2019_63594	re11.peg.3579_74303	re12.peg.2431_81917	re13.peg.4890_93522	re16.peg.4267_116201	re21.peg.2973_149049	rq23.peg.2646_169225	rq24.peg.2539_175877	rq25.peg.3507_183303	rq26.peg.1073_187597	rq27.peg.5160_198964	rq28.peg.5720_205945	re30.peg.1163_160832	rq29.peg.5356_214076
131	group_10998	N-acetylmuramoyl-L-alanine amidase	30	30	1	312	31016				413	1190	1116	re01.peg.1134_1134	re02.peg.1761_8942	re03.peg.3052_17278	re05.peg.3871_32334	6666666.340933.peg.384_35412	re07.peg.4119_46332	re08.peg.2857_51242	re09.peg.634_55516	re14.peg.6007_101836	re15.peg.8706_111357	re17.peg.4349_123255	re18.peg.2097_127933	re19.peg.5918_138464	re20.peg.2278_141052	re22.peg.6659_159451	re04.peg.4205_25510	re10.peg.7625_69200	re11.peg.6936_77660	re12.peg.6937_86423	re13.peg.6726_95358	re16.peg.5883_117817	re21.peg.2795_148871	rq23.peg.6338_172917	rq24.peg.3440_176778	rq25.peg.1955_181751	rq26.peg.6650_193174	rq27.peg.1939_195743	rq28.peg.1292_201518	re30.peg.4941_164610	rq29.peg.1827_210547
132	group_11012	DUF2236	30	30	1	312	5566				458	896	881	re01.peg.1247_1247	re02.peg.1630_8811	re03.peg.2970_17196	re05.peg.3973_32436	6666666.340933.peg.473_35501	re07.peg.4037_46250	re08.peg.2768_51153	re09.peg.535_55417	re14.peg.84_95913	re15.peg.130_102781	re17.peg.4242_123148	re18.peg.2195_128031	re19.peg.84_132630	re20.peg.2373_141147	re22.peg.509_153301	re04.peg.4124_25429	re10.peg.3660_65235	re11.peg.3991_74715	re12.peg.1589_81075	re13.peg.6817_95449	re16.peg.5801_117735	re21.peg.3792_149868	rq23.peg.92_166671	rq24.peg.3320_176658	rq25.peg.1868_181664	rq26.peg.865_187389	rq27.peg.1814_195618	rq28.peg.1164_201390	re30.peg.121_159790	rq29.peg.6159_214879
133	group_11014	FIG00967552: hypothetical protein	30	30	1	312	5573				290	953	915	re01.peg.1252_1252	re02.peg.1624_8805	re03.peg.2965_17191	re05.peg.3978_32441	6666666.340933.peg.478_35506	re07.peg.4032_46245	re08.peg.2763_51148	re09.peg.530_55412	re14.peg.89_95918	re15.peg.138_102789	re17.peg.4237_123143	re18.peg.2201_128037	re19.peg.89_132635	re20.peg.2378_141152	re22.peg.514_153306	re04.peg.4119_25424	re10.peg.3667_65242	re11.peg.3998_74722	re12.peg.1596_81082	re13.peg.6822_95454	re16.peg.5796_117730	re21.peg.3787_149863	rq23.peg.97_166676	rq24.peg.3315_176653	rq25.peg.1863_181659	rq26.peg.860_187384	rq27.peg.1809_195613	rq28.peg.1157_201383	re30.peg.126_159795	rq29.peg.6165_214885
134	group_11017	FIG022958: hypothetical protein	30	30	1	312	5718				203	1367	681	re01.peg.1312_1312	re02.peg.1574_8755	re03.peg.2910_17136	re05.peg.4026_32489	6666666.340933.peg.526_35554	re07.peg.3976_46189	re08.peg.2716_51101	re09.peg.481_55363	re14.peg.137_95966	re15.peg.208_102859	re17.peg.2675_121581	re18.peg.2249_128085	re19.peg.139_132685	re20.peg.2435_141209	re22.peg.563_153355	re04.peg.4662_25967	re10.peg.5451_67026	re11.peg.5500_76224	re12.peg.4338_83824	re13.peg.6870_95502	re16.peg.5704_117638	re21.peg.4343_150419	rq23.peg.146_166725	rq24.peg.3266_176604	rq25.peg.1814_181610	rq26.peg.811_187335	rq27.peg.1761_195565	rq28.peg.1099_201325	re30.peg.175_159844	rq29.peg.6221_214941
135	group_11018	hypothetical protein	30	30	1	312	5751				155	173	158	re01.peg.1328_1328	re02.peg.1555_8736	re03.peg.2895_17121	re05.peg.4042_32505	6666666.340933.peg.541_35569	re07.peg.3960_46173	re08.peg.2701_51086	re09.peg.465_55347	re14.peg.152_95981	re15.peg.231_102882	re17.peg.2660_121566	re18.peg.2265_128101	re19.peg.155_132701	re20.peg.2450_141224	re22.peg.578_153370	re04.peg.4677_25982	re10.peg.5429_67004	re11.peg.5520_76244	re12.peg.4316_83802	re13.peg.6885_95517	re16.peg.5689_117623	re21.peg.4361_150437	rq23.peg.162_166741	rq24.peg.3245_176583	rq25.peg.1799_181595	rq26.peg.796_187320	rq27.peg.1745_195549	rq28.peg.1082_201308	re30.peg.190_159859	rq29.peg.6236_214956
136	group_11019	N-acetyl-L L-diaminopimelate deacetylase	30	30	1	312	5767				1223	1262	1259	re01.peg.1336_1336	re02.peg.1548_8729	re03.peg.2888_17114	re05.peg.4049_32512	6666666.340933.peg.548_35576	re07.peg.3953_46166	re08.peg.2694_51079	re09.peg.458_55340	re14.peg.159_95988	re15.peg.239_102890	re17.peg.2654_121560	re18.peg.2273_128109	re19.peg.162_132708	re20.peg.2458_141232	re22.peg.585_153377	re04.peg.4683_25988	re10.peg.5418_66993	re11.peg.5527_76251	re12.peg.4306_83792	re13.peg.6891_95523	re16.peg.5683_117617	re21.peg.4367_150443	rq23.peg.168_166747	rq24.peg.3239_176577	rq25.peg.1793_181589	rq26.peg.790_187314	rq27.peg.1739_195543	rq28.peg.1074_201300	re30.peg.196_159865	rq29.peg.6242_214962
137	group_11022	hypothetical protein	30	30	1	312	5786				530	596	543	re01.peg.1349_1349	re02.peg.1536_8717	re03.peg.2876_17102	re05.peg.4062_32525	6666666.340933.peg.560_35588	re07.peg.3941_46154	re08.peg.2682_51067	re09.peg.446_55328	re14.peg.171_96000	re15.peg.254_102905	re17.peg.2641_121547	re18.peg.2285_128121	re19.peg.174_132720	re20.peg.2470_141244	re22.peg.597_153389	re04.peg.4696_26001	re10.peg.5402_66977	re11.peg.5543_76267	re12.peg.4290_83776	re13.peg.6904_95536	re16.peg.5670_117604	re21.peg.4380_150456	rq23.peg.181_166760	rq24.peg.3226_176564	rq25.peg.1780_181576	rq26.peg.777_187301	rq27.peg.1726_195530	rq28.peg.1061_201287	re30.peg.209_159878	rq29.peg.6255_214975
138	group_11025	putative ankyrin-like protein.	30	30	1	312	5843				269	563	416	re01.peg.1377_1377	re02.peg.1505_8686	re03.peg.2846_17072	re05.peg.4093_32556	re06.peg.590_35618	re07.peg.3911_46124	re08.peg.2652_51037	re09.peg.416_55298	re14.peg.201_96030	re15.peg.291_102942	re17.peg.2611_121517	re18.peg.6392_132227	re19.peg.204_132750	re20.peg.2500_141274	re22.peg.627_153419	re04.peg.4726_26031	re10.peg.7990_69565	re11.peg.7941_78665	re12.peg.6913_86399	re13.peg.6933_95565	re16.peg.5640_117574	re21.peg.5537_151613	rq23.peg.210_166789	rq24.peg.3196_176534	rq25.peg.1750_181546	rq26.peg.747_187271	rq27.peg.1696_195500	rq28.peg.1027_201253	re30.peg.239_159908	rq29.peg.6285_215005
139	group_11026	putative esterase	30	30	1	312	5886				815	1010	1001	re01.peg.1401_1401	re02.peg.1480_8661	re03.peg.967_15193	re05.peg.3436_31899	re06.peg.3819_38846	re07.peg.3891_46104	re08.peg.5115_53500	re09.peg.395_55277	re14.peg.223_96052	re15.peg.327_102978	re17.peg.2586_121492	re18.peg.2574_128410	re19.peg.224_132770	re20.peg.2520_141294	re22.peg.647_153439	re04.peg.5466_26771	re10.peg.8385_69960	re11.peg.2025_72749	re12.peg.7501_86987	re13.peg.6957_95589	re16.peg.1406_113340	re21.peg.4177_150253	rq23.peg.232_166811	rq24.peg.3174_176512	rq25.peg.1727_181523	rq26.peg.722_187246	rq27.peg.1674_195478	rq28.peg.1791_202017	re30.peg.264_159933	rq29.peg.3527_212247
140	group_11031	hypothetical protein Rv3802c	30	30	1	312	5890				509	971	933	re01.peg.1404_1404	re02.peg.1477_8658	re03.peg.970_15196	re05.peg.3433_31896	re06.peg.3816_38843	re07.peg.3888_46101	re08.peg.5118_53503	re09.peg.392_55274	re14.peg.226_96055	re15.peg.331_102982	re17.peg.2583_121489	re18.peg.2577_128413	re19.peg.227_132773	re20.peg.2523_141297	re22.peg.650_153442	re04.peg.5463_26768	re10.peg.3309_64884	re11.peg.2021_72745	re12.peg.8590_88076	re13.peg.6960_95592	re16.peg.1409_113343	re21.peg.4174_150250	rq23.peg.235_166814	rq24.peg.3171_176509	rq25.peg.1724_181520	rq26.peg.719_187243	rq27.peg.1671_195475	rq28.peg.1787_202013	re30.peg.267_159936	rq29.peg.3524_212244
141	group_11033	FMN reductase	30	30	1	312	5891				611	995	973	re01.peg.1405_1405	re02.peg.1476_8657	re03.peg.971_15197	re05.peg.3432_31895	re06.peg.3815_38842	re07.peg.3887_46100	re08.peg.5119_53504	re09.peg.391_55273	re14.peg.227_96056	re15.peg.332_102983	re17.peg.2582_121488	re18.peg.2578_128414	re19.peg.228_132774	re20.peg.2524_141298	re22.peg.651_153443	re04.peg.5462_26767	re10.peg.3307_64882	re11.peg.2020_72744	re12.peg.8589_88075	re13.peg.6961_95593	re16.peg.1410_113344	re21.peg.4173_150249	rq23.peg.236_166815	rq24.peg.3170_176508	rq25.peg.1723_181519	rq26.peg.718_187242	rq27.peg.1670_195474	rq28.peg.1786_202012	re30.peg.268_159937	rq29.peg.3523_212243
142	group_11036	Chromosome initiation inhibitor	30	30	1	312	5921				134	953	878	re01.peg.1410_1410	re02.peg.1450_8631	re03.peg.976_15202	re05.peg.3427_31890	re06.peg.3810_38837	re07.peg.3882_46095	re08.peg.5124_53509	re09.peg.386_55268	re14.peg.232_96061	re15.peg.361_103012	re17.peg.2577_121483	re18.peg.2583_128419	re19.peg.233_132779	re20.peg.2529_141303	re22.peg.656_153448	re04.peg.5457_26762	re10.peg.3299_64874	re11.peg.2014_72738	re12.peg.2185_81671	re13.peg.6966_95598	re16.peg.1415_113349	re21.peg.4151_150227	rq23.peg.241_166820	rq24.peg.3165_176503	rq25.peg.1718_181514	rq26.peg.713_187237	rq27.peg.1665_195469	rq28.peg.1781_202007	re30.peg.273_159942	rq29.peg.3518_212238
143	group_11039	Transcriptional regulator TetR family	30	30	1	312	5942				323	581	572	re01.peg.1419_1419	re02.peg.1439_8620	re03.peg.985_15211	re05.peg.3418_31881	re06.peg.3801_38828	re07.peg.3873_46086	re08.peg.5133_53518	re09.peg.377_55259	re14.peg.241_96070	re15.peg.380_103031	re17.peg.2568_121474	re18.peg.2594_128430	re19.peg.242_132788	re20.peg.2538_141312	re22.peg.665_153457	re04.peg.5448_26753	re10.peg.3287_64862	re11.peg.2002_72726	re12.peg.2197_81683	re13.peg.6975_95607	re16.peg.1424_113358	re21.peg.4142_150218	rq23.peg.250_166829	rq24.peg.3156_176494	rq25.peg.1709_181505	rq26.peg.704_187228	rq27.peg.1656_195460	rq28.peg.1769_201995	re30.peg.282_159951	rq29.peg.3509_212229
144	group_11041	Transcriptional regulator MarR family	30	30	1	312	6011				383	509	441	re01.peg.1446_1446	re02.peg.1401_8582	re03.peg.1015_15241	re05.peg.3385_31848	re06.peg.3766_38793	re07.peg.3841_46054	re08.peg.5166_53551	re09.peg.342_55224	re14.peg.274_96103	re15.peg.423_103074	re17.peg.2541_121447	re18.peg.2624_128460	re19.peg.272_132818	re20.peg.2574_141348	re22.peg.698_153490	re04.peg.5418_26723	re10.peg.3255_64830	re11.peg.1958_72682	re12.peg.2234_81720	re13.peg.6997_95629	re16.peg.1446_113380	re21.peg.4120_150196	rq23.peg.279_166858	rq24.peg.3121_176459	rq25.peg.1674_181470	rq26.peg.670_187194	rq27.peg.1621_195425	rq28.peg.1731_201957	re30.peg.316_159985	rq29.peg.3480_212200
145	group_11044	hypothetical protein	30	30	1	312	6166				557	1244	1218	re01.peg.1487_1487	re02.peg.1361_8542	re03.peg.1051_15277	re05.peg.3343_31806	re06.peg.3724_38751	re07.peg.3804_46017	re08.peg.5540_53925	re09.peg.296_55178	re14.peg.321_96150	re15.peg.501_103152	re17.peg.2473_121379	re18.peg.2662_128498	re19.peg.316_132862	re20.peg.2616_141390	re22.peg.758_153550	re04.peg.3769_25074	re10.peg.3198_64773	re11.peg.3459_74183	re12.peg.2286_81772	re13.peg.5188_93820	re16.peg.1499_113433	re21.peg.4078_150154	rq23.peg.333_166912	rq24.peg.3070_176408	rq25.peg.1629_181425	rq26.peg.609_187133	rq27.peg.1569_195373	rq28.peg.1642_201868	re30.peg.377_160046	rq29.peg.3419_212139
146	group_11046	Very-short-patch mismatch repair endonuclease (G-T specific)	30	30	1	312	6168				365	488	404	re01.peg.1489_1489	re02.peg.1359_8540	re03.peg.1053_15279	re05.peg.3341_31804	re06.peg.3722_38749	re07.peg.3802_46015	re08.peg.5542_53927	re09.peg.294_55176	re14.peg.323_96152	re15.peg.505_103156	re17.peg.2471_121377	re18.peg.2664_128500	re19.peg.318_132864	re20.peg.2618_141392	re22.peg.760_153552	re04.peg.3767_25072	re10.peg.3196_64771	re11.peg.3461_74185	re12.peg.2291_81777	re13.peg.5190_93822	re16.peg.1501_113435	re21.peg.4076_150152	rq23.peg.335_166914	rq24.peg.3068_176406	rq25.peg.1627_181423	rq26.peg.607_187131	rq27.peg.1567_195371	rq28.peg.1640_201866	re30.peg.379_160048	rq29.peg.3417_212137
147	group_11053	Ammonium transporter	30	30	1	312	6320				845	2486	1326	re01.peg.1567_1567	re02.peg.1281_8462	re03.peg.3382_17608	re05.peg.3233_31696	re06.peg.3645_38672	re07.peg.5119_47332	re08.peg.4269_52654	re09.peg.243_55125	re14.peg.411_96240	re15.peg.603_103254	re17.peg.2417_121323	re18.peg.2738_128574	re19.peg.372_132918	re20.peg.2692_141466	re22.peg.814_153606	re04.peg.3691_24996	re10.peg.1491_63066	re11.peg.6556_77280	re12.peg.3287_82773	re13.peg.5267_93899	re16.peg.1553_113487	re21.peg.4024_150100	rq23.peg.435_167014	rq24.peg.5034_178372	rq25.peg.1552_181348	rq26.peg.530_187054	rq27.peg.1490_195294	rq28.peg.7765_207990	re30.peg.456_160125	rq29.peg.3340_212060
148	group_11055	3-ketoacyl-CoA thiolase @ Acetyl-CoA acetyltransferase	30	30	1	312	6373				560	1130	1111	re01.peg.1594_1594	re02.peg.1250_8431	re03.peg.3354_17580	re05.peg.3203_31666	re06.peg.3616_38643	re07.peg.5148_47361	re08.peg.4240_52625	re09.peg.214_55096	re14.peg.439_96268	re15.peg.640_103291	re17.peg.2390_121296	re18.peg.2767_128603	re19.peg.401_132947	re20.peg.2721_141495	re22.peg.842_153634	re04.peg.3663_24968	re10.peg.1458_63033	re11.peg.6609_77333	re12.peg.3328_82814	re13.peg.5297_93929	re16.peg.1582_113516	re21.peg.3674_149750	rq23.peg.464_167043	rq24.peg.5063_178401	rq25.peg.1524_181320	rq26.peg.501_187025	rq27.peg.1460_195264	rq28.peg.3897_204123	re30.peg.485_160154	rq29.peg.3311_212031
149	group_11056	CysQ putative	30	30	1	312	6397				197	491	365	re01.peg.1606_1606	re02.peg.1237_8418	re03.peg.3342_17568	re05.peg.3190_31653	re06.peg.3604_38631	re07.peg.5160_47373	re08.peg.4228_52613	re09.peg.201_55083	re14.peg.450_96279	re15.peg.656_103307	re17.peg.2378_121284	re18.peg.2781_128617	re19.peg.412_132958	re20.peg.2732_141506	re22.peg.853_153645	re04.peg.3651_24956	re10.peg.1432_63007	re11.peg.3808_74532	re12.peg.3804_83290	re13.peg.5309_93941	re16.peg.1594_113528	re21.peg.3685_149761	rq23.peg.475_167054	rq24.peg.5074_178412	rq25.peg.1513_181309	rq26.peg.489_187013	rq27.peg.1449_195253	rq28.peg.3910_204136	re30.peg.497_160166	rq29.peg.3299_212019
150	group_11058	hydrolase haloacid dehalogenase-like family	30	30	1	312	6450				341	686	674	re01.peg.1629_1629	re02.peg.1208_8389	re03.peg.3316_17542	re05.peg.3163_31626	re06.peg.3578_38605	re07.peg.5185_47398	re08.peg.4192_52577	re09.peg.164_55046	re14.peg.476_96305	re15.peg.705_103356	re17.peg.2353_121259	re18.peg.5560_131395	re19.peg.437_132983	re20.peg.2757_141531	re22.peg.888_153680	re04.peg.5140_26445	re10.peg.1382_62957	re11.peg.3841_74565	re12.peg.3748_83234	re13.peg.2522_91154	re16.peg.885_112819	re21.peg.3708_149784	rq23.peg.500_167079	rq24.peg.5099_178437	rq25.peg.4709_184505	rq26.peg.463_186987	rq27.peg.1426_195230	rq28.peg.3943_204169	re30.peg.523_160192	rq29.peg.3797_212517
151	group_11072	hypothetical protein	30	30	1	312	19516				218	836	689	re01.peg.1695_1695	re02.peg.6726_13907	re03.peg.5189_19415	re05.peg.4857_33320	re06.peg.5426_40453	re07.peg.4219_46432	re08.peg.3997_52382	re09.peg.2890_57772	re14.peg.3653_99482	re15.peg.5402_108053	re17.peg.4187_123093	re18.peg.3811_129646	re19.peg.3594_136140	re20.peg.5738_144512	re22.peg.4368_157160	re04.peg.985_22290	re10.peg.2534_64109	re11.peg.1432_72156	re12.peg.6060_85546	re13.peg.4078_92710	re16.peg.3610_115544	re21.peg.4669_150745	rq23.peg.3850_170429	rq24.peg.4911_178249	rq25.peg.5173_184969	rq26.peg.4115_190639	rq27.peg.4221_198025	rq28.peg.5086_205312	re30.peg.2437_162106	rq29.peg.2882_211602
152	group_11080	Protein containing domains DUF403	30	30	1	312	19433				473	1259	973	re01.peg.1730_1730	re02.peg.5601_12782	re03.peg.5155_19381	re05.peg.4892_33355	re06.peg.5392_40419	re07.peg.4253_46466	re08.peg.4032_52417	re09.peg.2924_57806	re14.peg.3619_99448	re15.peg.5347_107998	re17.peg.4153_123059	re18.peg.3774_129609	re19.peg.3560_136106	re20.peg.5704_144478	re22.peg.4334_157126	re04.peg.1019_22324	re10.peg.2589_64164	re11.peg.1385_72109	re12.peg.6796_86282	re13.peg.4113_92745	re16.peg.3576_115510	re21.peg.4703_150779	rq23.peg.3816_170395	rq24.peg.4877_178215	rq25.peg.5138_184934	rq26.peg.4081_190605	rq27.peg.4187_197991	rq28.peg.5353_205578	re30.peg.2403_162072	rq29.peg.2917_211637
153	group_11082	Protein containing transglutaminase-like domain putative cysteine protease	30	30	1	312	19428				419	821	791	re01.peg.1731_1731	re02.peg.5600_12781	re03.peg.5154_19380	re05.peg.4893_33356	re06.peg.5391_40418	re07.peg.4254_46467	re08.peg.4033_52418	re09.peg.2925_57807	re14.peg.3618_99447	re15.peg.5346_107997	re17.peg.4152_123058	re18.peg.3773_129608	re19.peg.3559_136105	re20.peg.5703_144477	re22.peg.4333_157125	re04.peg.1020_22325	re10.peg.2590_64165	re11.peg.1384_72108	re12.peg.6797_86283	re13.peg.4114_92746	re16.peg.3575_115509	re21.peg.4704_150780	rq23.peg.3815_170394	rq24.peg.4876_178214	rq25.peg.5137_184933	rq26.peg.4080_190604	rq27.peg.4186_197990	rq28.peg.5354_205579	re30.peg.2402_162071	rq29.peg.2918_211638
154	group_11085	Aquaporin Z	30	30	1	312	19426				473	818	754	re01.peg.1732_1732	re02.peg.5599_12780	re03.peg.5153_19379	re05.peg.4894_33357	re06.peg.5390_40417	re07.peg.4255_46468	re08.peg.4034_52419	re09.peg.2926_57808	re14.peg.3617_99446	re15.peg.5345_107996	re17.peg.4151_123057	re18.peg.3772_129607	re19.peg.3558_136104	re20.peg.5702_144476	re22.peg.4332_157124	re04.peg.1021_22326	re10.peg.2591_64166	re11.peg.1382_72106	re12.peg.6799_86285	re13.peg.4115_92747	re16.peg.3574_115508	re21.peg.4705_150781	rq23.peg.3814_170393	rq24.peg.4875_178213	rq25.peg.5136_184932	rq26.peg.4079_190603	rq27.peg.4185_197989	rq28.peg.5355_205580	re30.peg.2401_162070	rq29.peg.2919_211639
155	group_11093	FIG00996507: hypothetical protein	30	30	1	312	19378				416	776	764	re01.peg.1758_1758	re02.peg.5570_12751	re03.peg.5127_19353	re05.peg.4922_33385	re06.peg.5364_40391	re07.peg.4281_46494	re08.peg.4060_52445	re09.peg.2952_57834	re14.peg.3591_99420	re15.peg.5308_107959	re17.peg.4124_123030	re18.peg.3746_129581	re19.peg.3532_136078	re20.peg.5676_144450	re22.peg.4306_157098	re04.peg.1047_22352	re10.peg.2630_64205	re11.peg.4894_75618	re12.peg.5790_85276	re13.peg.4142_92774	re16.peg.3547_115481	re21.peg.4731_150807	rq23.peg.3788_170367	rq24.peg.4848_178186	rq25.peg.5110_184906	rq26.peg.4002_190526	rq27.peg.4158_197962	rq28.peg.5385_205610	re30.peg.2373_162042	rq29.peg.2946_211666
156	group_11101	Regulator of polyketide synthase expression	30	30	1	312	19231				272	1328	1240	re01.peg.1830_1830	re02.peg.5145_12326	re03.peg.5059_19285	re05.peg.6016_34479	re06.peg.5296_40323	re07.peg.4354_46567	re08.peg.3168_51553	re09.peg.3024_57906	re14.peg.3519_99348	re15.peg.5214_107865	re17.peg.5772_124678	re18.peg.5481_131316	re19.peg.3460_136006	re20.peg.5608_144382	re22.peg.4237_157029	re04.peg.1119_22424	re10.peg.8293_69868	re11.peg.2498_73222	re12.peg.5275_84761	re13.peg.4211_92843	re16.peg.421_112355	re21.peg.1920_147996	rq23.peg.3720_170299	rq24.peg.4771_178109	rq25.peg.4790_184586	rq26.peg.3933_190457	rq27.peg.4066_197870	rq28.peg.2671_202897	re30.peg.2302_161971	rq29.peg.5861_214581
157	group_11102	hypothetical protein	30	30	1	312	19217				125	236	209	re01.peg.1835_1835	re02.peg.5073_12254	re03.peg.5054_19280	re05.peg.6022_34485	re06.peg.5291_40318	re07.peg.4360_46573	re08.peg.3174_51559	re09.peg.3029_57911	re14.peg.3514_99343	re15.peg.5207_107858	re17.peg.5767_124673	re18.peg.5486_131321	re19.peg.3452_135998	re20.peg.5602_144376	re22.peg.4231_157023	re04.peg.1125_22430	re10.peg.8964_70539	re11.peg.2503_73227	re12.peg.7179_86665	re13.peg.4216_92848	re16.peg.426_112360	re21.peg.1914_147990	rq23.peg.3714_170293	rq24.peg.4749_178087	rq25.peg.4796_184592	rq26.peg.3928_190452	rq27.peg.4060_197864	rq28.peg.2665_202891	re30.peg.2296_161965	rq29.peg.5855_214575
158	group_11103	FIG00995202: hypothetical protein	30	30	1	312	19183				125	191	184	re01.peg.1846_1846	re02.peg.5060_12241	re03.peg.5043_19269	re05.peg.6032_34495	re06.peg.5281_40308	re07.peg.4371_46584	re08.peg.3184_51569	re09.peg.3039_57921	re14.peg.3504_99333	re15.peg.5191_107842	re17.peg.5755_124661	re18.peg.5497_131332	re19.peg.3442_135988	re20.peg.5592_144366	re22.peg.4220_157012	re04.peg.1135_22440	re10.peg.8256_69831	re11.peg.2517_73241	re12.peg.7164_86650	re13.peg.4227_92859	re16.peg.436_112370	re21.peg.1903_147979	rq23.peg.3703_170282	rq24.peg.4738_178076	rq25.peg.4807_184603	rq26.peg.3917_190441	rq27.peg.4049_197853	rq28.peg.2654_202880	re30.peg.2284_161953	rq29.peg.5844_214564
159	group_11104	hypothetical protein	30	30	1	312	19178				230	527	432	re01.peg.1849_1849	re02.peg.5056_12237	re03.peg.5040_19266	re05.peg.6035_34498	re06.peg.5278_40305	re07.peg.4374_46587	re08.peg.3187_51572	re09.peg.3042_57924	re14.peg.3501_99330	re15.peg.5188_107839	re17.peg.5752_124658	re18.peg.5500_131335	re19.peg.3439_135985	re20.peg.5589_144363	re22.peg.4217_157009	re04.peg.1138_22443	re10.peg.8260_69835	re11.peg.2521_73245	re12.peg.7159_86645	re13.peg.4230_92862	re16.peg.439_112373	re21.peg.1900_147976	rq23.peg.3700_170279	rq24.peg.4735_178073	rq25.peg.4810_184606	rq26.peg.3914_190438	rq27.peg.4046_197850	rq28.peg.2651_202877	re30.peg.2281_161950	rq29.peg.5840_214560
160	group_11108	hypothetical protein	30	30	1	312	19136				458	524	460	re01.peg.1873_1873	re02.peg.5023_12204	re03.peg.5015_19241	re05.peg.6062_34525	re06.peg.5254_40281	re07.peg.4398_46611	re08.peg.3211_51596	re09.peg.3065_57947	re14.peg.3476_99305	re15.peg.5158_107809	re17.peg.5729_124635	re18.peg.5525_131360	re19.peg.3413_135959	re20.peg.5564_144338	re22.peg.4192_156984	re04.peg.1161_22466	re10.peg.7178_68753	re11.peg.2549_73273	re12.peg.6421_85907	re13.peg.4253_92885	re16.peg.463_112397	re21.peg.1877_147953	rq23.peg.3677_170256	rq24.peg.4712_178050	rq25.peg.4833_184629	rq26.peg.3891_190415	rq27.peg.4023_197827	rq28.peg.2626_202852	re30.peg.2258_161927	rq29.peg.5816_214536
161	group_11111	hypothetical protein	30	30	1	312	19032				389	389	389	re01.peg.1914_1914	re02.peg.4988_12169	re03.peg.4961_19187	re05.peg.4290_32753	re06.peg.5224_40251	re07.peg.4429_46642	re08.peg.3241_51626	re09.peg.3115_57997	re14.peg.3446_99275	re15.peg.5120_107771	re17.peg.4984_123890	re18.peg.5330_131165	re19.peg.3383_135929	re20.peg.5534_144308	re22.peg.4162_156954	re04.peg.1193_22498	re10.peg.8327_69902	re11.peg.4426_75150	re12.peg.8021_87507	re13.peg.2628_91260	re16.peg.6712_118646	re21.peg.2084_148160	rq23.peg.3646_170225	rq24.peg.4279_177617	rq25.peg.4864_184660	rq26.peg.6014_192538	rq27.peg.3992_197796	rq28.peg.2594_202820	re30.peg.2179_161848	rq29.peg.2365_211085
162	group_11117	5 10-methylenetetrahydrofolate reductase	30	30	1	312	18979				644	989	964	re01.peg.1944_1944	re02.peg.6130_13311	re03.peg.4929_19155	re05.peg.4257_32720	re06.peg.5193_40220	re07.peg.4460_46673	re08.peg.3272_51657	re09.peg.3147_58029	re14.peg.3415_99244	re15.peg.5080_107731	re17.peg.4953_123859	re18.peg.5296_131131	re19.peg.3350_135896	re20.peg.5501_144275	re22.peg.4129_156921	re04.peg.1224_22529	re10.peg.6717_68292	re11.peg.4387_75111	re12.peg.7527_87013	re13.peg.2659_91291	re16.peg.6743_118677	re21.peg.2052_148128	rq23.peg.3615_170194	rq24.peg.4249_177587	rq25.peg.4895_184691	rq26.peg.5982_192506	rq27.peg.3961_197765	rq28.peg.2559_202785	re30.peg.2148_161817	rq29.peg.2396_211116
163	group_11119	Acetyltransferase	30	30	1	312	18974				200	716	609	re01.peg.1947_1947	re02.peg.6134_13315	re03.peg.4926_19152	re05.peg.4253_32716	re06.peg.5190_40217	re07.peg.4463_46676	re08.peg.3275_51660	re09.peg.3150_58032	re14.peg.3412_99241	re15.peg.5076_107727	re17.peg.4950_123856	re18.peg.5293_131128	re19.peg.3347_135893	re20.peg.5498_144272	re22.peg.4126_156918	re04.peg.1227_22532	re10.peg.6720_68295	re11.peg.4382_75106	re12.peg.7530_87016	re13.peg.2662_91294	re16.peg.6746_118680	re21.peg.2049_148125	rq23.peg.3612_170191	rq24.peg.4246_177584	rq25.peg.4898_184694	rq26.peg.5979_192503	rq27.peg.3958_197762	rq28.peg.2555_202781	re30.peg.2145_161814	rq29.peg.2399_211119
164	group_11120	hypothetical protein	30	30	1	312	18833				143	164	157	re01.peg.2024_2024	re02.peg.6220_13401	re03.peg.6841_21067	re05.peg.4179_32642	re06.peg.5117_40144	re07.peg.4535_46748	re08.peg.3351_51736	re09.peg.3222_58104	re14.peg.3339_99168	re15.peg.4968_107619	re17.peg.5073_123979	re18.peg.4395_130230	re19.peg.3276_135822	re20.peg.5424_144198	re22.peg.4051_156843	re04.peg.4452_25757	re10.peg.4996_66571	re11.peg.6304_77028	re12.peg.963_80449	re13.peg.2736_91368	re16.peg.3461_115395	re21.peg.1975_148051	rq23.peg.3536_170115	rq24.peg.4170_177508	rq25.peg.4973_184769	rq26.peg.5904_192428	rq27.peg.3876_197680	rq28.peg.6329_206554	re30.peg.2072_161741	rq29.peg.4214_212934
165	group_11124	Imidazole glycerol phosphate synthase amidotransferase subunit	30	30	1	312	20316				413	635	614	re01.peg.2074_2074	re02.peg.6509_13690	re03.peg.6789_21015	re05.peg.4126_32589	re06.peg.5067_40094	re07.peg.5728_47941	re08.peg.5682_54067	re09.peg.3271_58153	re14.peg.3289_99118	re15.peg.4889_107540	re17.peg.5023_123929	re18.peg.4341_130176	re19.peg.3225_135771	re20.peg.5373_144147	re22.peg.4001_156793	re04.peg.4501_25806	re10.peg.8779_70354	re11.peg.6799_77523	re12.peg.1036_80522	re13.peg.6020_94652	re16.peg.2839_114773	re21.peg.2659_148735	rq23.peg.3487_170066	rq24.peg.6118_179456	rq25.peg.5024_184820	rq26.peg.6596_193120	rq27.peg.3827_197631	rq28.peg.4325_204551	re30.peg.2013_161682	rq29.peg.3749_212469
166	group_11126	GTP-binding protein EngA	30	30	1	312	25665				476	1427	1370	re01.peg.2110_2110	re02.peg.4759_11940	re03.peg.338_14564	re05.peg.4744_33207	re06.peg.4527_39554	re07.peg.3762_45975	re08.peg.6136_54521	re09.peg.3419_58301	re14.peg.3140_98969	re15.peg.4666_107317	re17.peg.5654_124560	re18.peg.4075_129910	re19.peg.3075_135621	re20.peg.5153_143927	re22.peg.3794_156586	re04.peg.5050_26355	re10.peg.4743_66318	re11.peg.6836_77560	re12.peg.5665_85151	re13.peg.3668_92300	re16.peg.678_112612	re21.peg.6323_152399	rq23.peg.3334_169913	rq24.peg.6141_179479	rq25.peg.2029_181825	rq26.peg.3007_189531	rq27.peg.4425_198229	rq28.peg.5918_206143	re30.peg.1848_161517	rq29.peg.3557_212277
167	group_11130	Glycine cleavage system H protein	30	30	1	312	25591				404	533	413	re01.peg.2139_2139	re02.peg.4728_11909	re03.peg.310_14536	re05.peg.4715_33178	re06.peg.4505_39532	re07.peg.3734_45947	re08.peg.5851_54236	re09.peg.3456_58338	re14.peg.3110_98939	re15.peg.4626_107277	re17.peg.5685_124591	re18.peg.4044_129879	re19.peg.3047_135593	re20.peg.5127_143901	re22.peg.3765_156557	re04.peg.5022_26327	re10.peg.4699_66274	re11.peg.5397_76121	re12.peg.6695_86181	re13.peg.3698_92330	re16.peg.4463_116397	re21.peg.6303_152379	rq23.peg.3307_169886	rq24.peg.2707_176045	rq25.peg.2055_181851	rq26.peg.2979_189503	rq27.peg.4452_198256	rq28.peg.5950_206175	re30.peg.1821_161490	rq29.peg.3620_212340
168	group_11133	Lipoprotein LppL	30	30	1	312	25561				671	1025	1013	re01.peg.2155_2155	re02.peg.4707_11888	re03.peg.294_14520	re05.peg.4699_33162	re06.peg.4489_39516	re07.peg.3718_45931	re08.peg.5867_54252	re09.peg.3472_58354	re14.peg.3093_98922	re15.peg.4602_107253	re17.peg.5701_124607	re18.peg.4027_129862	re19.peg.3031_135577	re20.peg.5111_143885	re22.peg.3749_156541	re04.peg.5006_26311	re10.peg.4679_66254	re11.peg.5418_76142	re12.peg.6671_86157	re13.peg.3714_92346	re16.peg.4447_116381	re21.peg.6287_152363	rq23.peg.3291_169870	rq24.peg.2691_176029	rq25.peg.2071_181867	rq26.peg.2963_189487	rq27.peg.4468_198272	rq28.peg.5968_206193	re30.peg.1805_161474	rq29.peg.4393_213113
169	group_11137	Heme ABC transporter ATPase component HmuV	30	30	1	312	25558				425	869	846	re01.peg.2157_2157	re02.peg.4703_11884	re03.peg.292_14518	re05.peg.4697_33160	re06.peg.4487_39514	re07.peg.3716_45929	re08.peg.5869_54254	re09.peg.3474_58356	re14.peg.3091_98920	re15.peg.4600_107251	re17.peg.5703_124609	re18.peg.4025_129860	re19.peg.3029_135575	re20.peg.5109_143883	re22.peg.3747_156539	re04.peg.5004_26309	re10.peg.4677_66252	re11.peg.5421_76145	re12.peg.6667_86153	re13.peg.3716_92348	re16.peg.4445_116379	re21.peg.6285_152361	rq23.peg.3289_169868	rq24.peg.2689_176027	rq25.peg.2073_181869	rq26.peg.2961_189485	rq27.peg.4470_198274	rq28.peg.5971_206196	re30.peg.1803_161472	rq29.peg.4391_213111
170	group_11138	hypothetical protein	30	30	1	312	25535				626	1085	965	re01.peg.2172_2172	re02.peg.4681_11862	re03.peg.277_14503	re05.peg.4681_33144	re06.peg.4472_39499	re07.peg.3701_45914	re08.peg.5884_54269	re09.peg.3489_58371	re14.peg.3076_98905	re15.peg.4575_107226	re17.peg.5718_124624	re18.peg.4009_129844	re19.peg.3014_135560	re20.peg.5094_143868	re22.peg.3732_156524	re04.peg.4989_26294	re10.peg.8234_69809	re11.peg.5439_76163	re12.peg.6734_86220	re13.peg.3731_92363	re16.peg.4430_116364	re21.peg.6270_152346	rq23.peg.3274_169853	rq24.peg.2674_176012	rq25.peg.2088_181884	rq26.peg.2946_189470	rq27.peg.4485_198289	rq28.peg.5990_206215	re30.peg.1788_161457	rq29.peg.4651_213371
171	group_11141	FIG01000472: hypothetical protein	30	30	1	312	25469				122	1169	448	re01.peg.2202_2202	re02.peg.4646_11827	re03.peg.4239_18465	re05.peg.4649_33112	re06.peg.4441_39468	re07.peg.3670_45883	re08.peg.2306_50691	re09.peg.3520_58402	re14.peg.3045_98874	re15.peg.4530_107181	re17.peg.3628_122534	re18.peg.3979_129814	re19.peg.2984_135530	re20.peg.5063_143837	re22.peg.3701_156493	re04.peg.1814_23119	re10.peg.6844_68419	re11.peg.6454_77178	re12.peg.8939_88425	re13.peg.3763_92395	re16.peg.4399_116333	re21.peg.5165_151241	rq23.peg.3243_169822	rq24.peg.1938_175276	rq25.peg.2119_181915	rq26.peg.4067_190591	rq27.peg.4515_198319	rq28.peg.30_200257	re30.peg.1758_161427	rq29.peg.2215_210935
172	group_11142	Osmosensitive K+ channel histidine kinase KdpD	30	30	1	312	25461				674	977	952	re01.peg.2207_2207	re02.peg.4640_11821	re03.peg.4234_18460	re05.peg.4644_33107	re06.peg.4436_39463	re07.peg.3665_45878	re08.peg.2301_50686	re09.peg.3525_58407	re14.peg.3040_98869	re15.peg.4525_107176	re17.peg.3633_122539	re18.peg.3974_129809	re19.peg.2979_135525	re20.peg.5058_143832	re22.peg.3696_156488	re04.peg.1809_23114	re10.peg.6850_68425	re11.peg.6458_77182	re12.peg.7601_87087	re13.peg.3768_92400	re16.peg.4394_116328	re21.peg.5160_151236	rq23.peg.3238_169817	rq24.peg.1943_175281	rq25.peg.2124_181920	rq26.peg.4062_190586	rq27.peg.4520_198324	rq28.peg.36_200263	re30.peg.1753_161422	rq29.peg.2210_210930
173	group_11147	putative signal transduction histidine kinase	30	30	1	312	25412				1031	1205	1125	re01.peg.2228_2228	re02.peg.4606_11787	re03.peg.4211_18437	re05.peg.4623_33086	re06.peg.4412_39439	re07.peg.3643_45856	re08.peg.2279_50664	re09.peg.3548_58430	re14.peg.3018_98847	re15.peg.4493_107144	re17.peg.3654_122560	re18.peg.3953_129788	re19.peg.2956_135502	re20.peg.5036_143810	re22.peg.3673_156465	re04.peg.1786_23091	re10.peg.6877_68452	re11.peg.6482_77206	re12.peg.8807_88293	re13.peg.3788_92420	re16.peg.4374_116308	re21.peg.5139_151215	rq23.peg.3216_169795	rq24.peg.1963_175301	rq25.peg.2144_181940	rq26.peg.4042_190566	rq27.peg.4540_198344	rq28.peg.56_200283	re30.peg.1733_161402	rq29.peg.2190_210910
174	group_11148	Transcriptional regulator MecI family	30	30	1	312	25324				251	434	392	re01.peg.2257_2257	re02.peg.4364_11545	re03.peg.4181_18407	re05.peg.4592_33055	re06.peg.3957_38984	re07.peg.3611_45824	re08.peg.2248_50633	re09.peg.3578_58460	re14.peg.2986_98815	re15.peg.4437_107088	re17.peg.3686_122592	re18.peg.3922_129757	re19.peg.2926_135472	re20.peg.5004_143778	re22.peg.3642_156434	re04.peg.1754_23059	re10.peg.4259_65834	re11.peg.4742_75466	re12.peg.4430_83916	re13.peg.3526_92158	re16.peg.4341_116275	re21.peg.5106_151182	rq23.peg.3184_169763	rq24.peg.1995_175333	rq25.peg.2177_181973	rq26.peg.5527_192051	rq27.peg.4571_198375	rq28.peg.106_200333	re30.peg.1699_161368	rq29.peg.2841_211561
175	group_11154	putative periplasmic protein kinase ArgK and related GTPases of G3E family	30	30	1	312	25294				491	992	944	re01.peg.2272_2272	re02.peg.4343_11524	re03.peg.4166_18392	re05.peg.4574_33037	re06.peg.3972_38999	re07.peg.3596_45809	re08.peg.2233_50618	re09.peg.3593_58475	re14.peg.2971_98800	re15.peg.4416_107067	re17.peg.3701_122607	re18.peg.3005_128840	re19.peg.2911_135457	re20.peg.4989_143763	re22.peg.3627_156419	re04.peg.1739_23044	re10.peg.4238_65813	re11.peg.5961_76685	re12.peg.8563_88049	re13.peg.3511_92143	re16.peg.2507_114441	re21.peg.5091_151167	rq23.peg.3169_169748	rq24.peg.2009_175347	rq25.peg.2192_181988	rq26.peg.5542_192066	rq27.peg.4585_198389	rq28.peg.122_200349	re30.peg.1684_161353	rq29.peg.1074_209794
176	group_11157	FIG00999585: hypothetical protein	30	30	1	312	25271				344	536	487	re01.peg.2283_2283	re02.peg.4332_11513	re03.peg.4155_18381	re05.peg.4562_33025	re06.peg.3983_39010	re07.peg.3585_45798	re08.peg.2222_50607	re09.peg.3604_58486	re14.peg.2960_98789	re15.peg.4404_107055	re17.peg.3712_122618	re18.peg.2993_128828	re19.peg.2900_135446	re20.peg.4978_143752	re22.peg.3616_156408	re04.peg.1728_23033	re10.peg.4223_65798	re11.peg.5979_76703	re12.peg.7784_87270	re13.peg.3501_92133	re16.peg.313_112247	re21.peg.5080_151156	rq23.peg.3158_169737	rq24.peg.2020_175358	rq25.peg.2203_181999	rq26.peg.5553_192077	rq27.peg.4596_198400	rq28.peg.134_200361	re30.peg.1673_161342	rq29.peg.1085_209805
177	group_11159	hypothetical protein PA3071	30	30	1	312	25262				242	992	955	re01.peg.2290_2290	re02.peg.4324_11505	re03.peg.4148_18374	re05.peg.4556_33019	re06.peg.3990_39017	re07.peg.3578_45791	re08.peg.2215_50600	re09.peg.3611_58493	re14.peg.2953_98782	re15.peg.4396_107047	re17.peg.3719_122625	re18.peg.2986_128821	re19.peg.2893_135439	re20.peg.4971_143745	re22.peg.3609_156401	re04.peg.1721_23026	re10.peg.4214_65789	re11.peg.5988_76712	re12.peg.7774_87260	re13.peg.3494_92126	re16.peg.320_112254	re21.peg.5073_151149	rq23.peg.3151_169730	rq24.peg.2027_175365	rq25.peg.2210_182006	rq26.peg.5560_192084	rq27.peg.4603_198407	rq28.peg.141_200368	re30.peg.1666_161335	rq29.peg.1092_209812
178	group_11169	FIG002813: LPPG:FO 2-phospho-L-lactate transferase like CofD-like	30	30	1	312	25136				638	1064	1035	re01.peg.2337_2337	re02.peg.4268_11449	re03.peg.4103_18329	re05.peg.4505_32968	re06.peg.4047_39074	re07.peg.3532_45745	re08.peg.2169_50554	re09.peg.3655_58537	re14.peg.2908_98737	re15.peg.4319_106970	re17.peg.3767_122673	re18.peg.2937_128772	re19.peg.2847_135393	re20.peg.4925_143699	re22.peg.3563_156355	re04.peg.1674_22979	re10.peg.8674_70249	re11.peg.8183_78907	re12.peg.8921_88407	re13.peg.3446_92078	re16.peg.368_112302	re21.peg.5025_151101	rq23.peg.3104_169683	rq24.peg.2076_175414	rq25.peg.2297_182093	rq26.peg.5611_192135	rq27.peg.4652_198456	rq28.peg.202_200429	re30.peg.1616_161285	rq29.peg.1141_209861
179	group_11171	Hypothetical ATP-binding protein UPF0042 contains P-loop	30	30	1	312	25135				641	902	889	re01.peg.2338_2338	re02.peg.4267_11448	re03.peg.4102_18328	re05.peg.4504_32967	re06.peg.4048_39075	re07.peg.3531_45744	re08.peg.2168_50553	re09.peg.3656_58538	re14.peg.2907_98736	re15.peg.4318_106969	re17.peg.3768_122674	re18.peg.2936_128771	re19.peg.2846_135392	re20.peg.4924_143698	re22.peg.3562_156354	re04.peg.1673_22978	re10.peg.8675_70250	re11.peg.8182_78906	re12.peg.8920_88406	re13.peg.3445_92077	re16.peg.369_112303	re21.peg.5024_151100	rq23.peg.3103_169682	rq24.peg.2077_175415	rq25.peg.2298_182094	rq26.peg.5612_192136	rq27.peg.4653_198457	rq28.peg.204_200431	re30.peg.1615_161284	rq29.peg.1142_209862
180	group_11173	Methionyl-tRNA formyltransferase	30	30	1	312	25106				614	923	893	re01.peg.2349_2349	re02.peg.4256_11437	re03.peg.4092_18318	re05.peg.4492_32955	re06.peg.4058_39085	re07.peg.3521_45734	re08.peg.2158_50543	re09.peg.3666_58548	re14.peg.2897_98726	re15.peg.4303_106954	re17.peg.3778_122684	re18.peg.2926_128761	re19.peg.2836_135382	re20.peg.4914_143688	re22.peg.3552_156344	re04.peg.1662_22967	re10.peg.8825_70400	re11.peg.8486_79210	re12.peg.8709_88195	re13.peg.3435_92067	re16.peg.379_112313	re21.peg.5013_151089	rq23.peg.3093_169672	rq24.peg.2087_175425	rq25.peg.2308_182104	rq26.peg.5623_192147	rq27.peg.4663_198467	rq28.peg.217_200444	re30.peg.1604_161273	rq29.peg.1152_209872
181	group_11176	Guanylate kinase	30	30	1	312	25093				479	620	558	re01.peg.2357_2357	re02.peg.4247_11428	re03.peg.4084_18310	re05.peg.4484_32947	re06.peg.4066_39093	re07.peg.3513_45726	re08.peg.2150_50535	re09.peg.3674_58556	re14.peg.2889_98718	re15.peg.4291_106942	re17.peg.3786_122692	re18.peg.2918_128753	re19.peg.2828_135374	re20.peg.4906_143680	re22.peg.3544_156336	re04.peg.1654_22959	re10.peg.8362_69937	re11.peg.7967_78691	re12.peg.7942_87428	re13.peg.3427_92059	re16.peg.387_112321	re21.peg.5004_151080	rq23.peg.3085_169664	rq24.peg.2096_175434	rq25.peg.2316_182112	rq26.peg.5631_192155	rq27.peg.4671_198475	rq28.peg.228_200455	re30.peg.1596_161265	rq29.peg.1160_209880
182	group_11187	Alkylphosphonate utilization operon protein PhnA	30	30	1	312	25026				146	368	342	re01.peg.2393_2393	re02.peg.4205_11386	re03.peg.4048_18274	re05.peg.4448_32911	re06.peg.4101_39128	re07.peg.3478_45691	re08.peg.2115_50500	re09.peg.3711_58593	re14.peg.2854_98683	re15.peg.4237_106888	re17.peg.3822_122728	re18.peg.2880_128715	re19.peg.2792_135338	re20.peg.4871_143645	re22.peg.3508_156300	re04.peg.1618_22923	re10.peg.6621_68196	re11.peg.7571_78295	re12.peg.7411_86897	re13.peg.3390_92022	re16.peg.2145_114079	re21.peg.4967_151043	rq23.peg.3048_169627	rq24.peg.2135_175473	rq25.peg.2354_182150	rq26.peg.5695_192219	rq27.peg.4707_198511	rq28.peg.269_200496	re30.peg.1560_161229	rq29.peg.1197_209917
183	group_11190	Transcriptional regulator TetR family	30	30	1	312	24962				596	596	596	re01.peg.2422_2422	re02.peg.6011_13192	re03.peg.4021_18247	re05.peg.4419_32882	re06.peg.4129_39156	re07.peg.3451_45664	re08.peg.2088_50473	re09.peg.3740_58622	re14.peg.2826_98655	re15.peg.4201_106852	re17.peg.3850_122756	re18.peg.2851_128686	re19.peg.2765_135311	re20.peg.4842_143616	re22.peg.3481_156273	re04.peg.1590_22895	re10.peg.6583_68158	re11.peg.7315_78039	re12.peg.7099_86585	re13.peg.3362_91994	re16.peg.2118_114052	re21.peg.4939_151015	rq23.peg.3021_169600	rq24.peg.2162_175500	rq25.peg.2381_182177	rq26.peg.5723_192247	rq27.peg.4734_198538	rq28.peg.299_200526	re30.peg.1533_161202	rq29.peg.1224_209944
184	group_11191	Succinyl-CoA:3-ketoacid-coenzyme A transferase subunit A	30	30	1	312	3788				569	767	743	re01.peg.2429_2429	re02.peg.6231_13412	re03.peg.6129_20355	re05.peg.6166_34629	re06.peg.6741_41767	re07.peg.2773_44986	re08.peg.3548_51933	re09.peg.4683_59565	re14.peg.1874_97703	re15.peg.2781_105432	re17.peg.1724_120630	re18.peg.5889_131724	re19.peg.1821_134367	re20.peg.1_138775	re22.peg.2344_155136	re04.peg.588_21893	re10.peg.5625_67200	re11.peg.5120_75844	re12.peg.4363_83849	re13.peg.375_89007	re16.peg.5776_117710	re21.peg.2141_148217	rq23.peg.1925_168504	rq24.peg.6195_179533	rq25.peg.5892_185688	rq26.peg.2390_188914	rq27.peg.7_193811	rq28.peg.3377_203603	re30.peg.6169_165838	rq29.peg.2475_211195
185	group_11194	Acetoacetyl-CoA synthetase / Long-chain-fatty-acid--CoA ligase	30	30	1	312	3847				683	1637	1572	re01.peg.2449_2449	re02.peg.6249_13430	re03.peg.6110_20336	re05.peg.6149_34612	re06.peg.6758_41784	re07.peg.2753_44966	re08.peg.3565_51950	re09.peg.4700_59582	re14.peg.1857_97686	re15.peg.2751_105402	re17.peg.1743_120649	re18.peg.5909_131744	re19.peg.1802_134348	re20.peg.19_138793	re22.peg.2326_155118	re04.peg.607_21912	re10.peg.5659_67234	re11.peg.5094_75818	re12.peg.4404_83890	re13.peg.356_88988	re16.peg.5753_117687	re21.peg.2160_148236	rq23.peg.1906_168485	rq24.peg.6215_179553	rq25.peg.5917_185713	rq26.peg.2409_188933	rq27.peg.26_193830	rq28.peg.3358_203584	re30.peg.6150_165819	rq29.peg.2456_211176
186	group_11196	Ethanolamine permease	30	30	1	312	3883				656	1505	1415	re01.peg.2455_2455	re02.peg.6257_13438	re03.peg.6103_20329	re05.peg.6143_34606	re06.peg.5534_40561	re07.peg.2746_44959	re08.peg.3571_51956	re09.peg.4706_59588	re14.peg.1851_97680	re15.peg.2744_105395	re17.peg.1750_120656	re18.peg.5915_131750	re19.peg.1796_134342	re20.peg.25_138799	re22.peg.2319_155111	re04.peg.613_21918	re10.peg.5671_67246	re11.peg.5086_75810	re12.peg.4415_83901	re13.peg.350_88982	re16.peg.5747_117681	re21.peg.2166_148242	rq23.peg.1900_168479	rq24.peg.6222_179560	rq25.peg.5923_185719	rq26.peg.2415_188939	rq27.peg.32_193836	rq28.peg.3350_203576	re30.peg.6144_165813	rq29.peg.2450_211170
187	group_11204	Translation elongation factor G	30	30	1	312	3972				878	2174	2080	re01.peg.2504_2504	re02.peg.4584_11765	re03.peg.6052_20278	re05.peg.3761_32224	re06.peg.894_35922	re07.peg.2694_44907	re08.peg.3622_52007	re09.peg.4756_59638	re14.peg.1801_97630	re15.peg.2678_105329	re17.peg.1800_120706	re18.peg.5159_130994	re19.peg.1746_134292	re20.peg.75_138849	re22.peg.2268_155060	re04.peg.663_21968	re10.peg.6164_67739	re11.peg.5374_76098	re12.peg.5728_85214	re13.peg.301_88933	re16.peg.5595_117529	re21.peg.2216_148292	rq23.peg.1851_168430	rq24.peg.4523_177861	rq25.peg.5972_185768	rq26.peg.2465_188989	rq27.peg.82_193886	rq28.peg.1556_201782	re30.peg.6094_165763	rq29.peg.1366_210086
188	group_11221	Octaprenyl diphosphate synthase / Dimethylallyltransferase / (2E 6E)-farnesyl diphosphate synthase / Geranylgeranyl diphosphate synthase	30	30	1	312	4066				629	1079	1055	re01.peg.2559_2559	re02.peg.4525_11706	re03.peg.1524_15750	re05.peg.3700_32163	re06.peg.951_35979	re07.peg.2637_44850	re08.peg.3680_52065	re09.peg.4813_59695	re14.peg.1746_97575	re15.peg.2603_105254	re17.peg.1857_120763	re18.peg.5217_131052	re19.peg.1691_134237	re20.peg.131_138905	re22.peg.2213_155005	re04.peg.720_22025	re10.peg.8739_70314	re11.peg.4094_74818	re12.peg.7448_86934	re13.peg.244_88876	re16.peg.5538_117472	re21.peg.2273_148349	rq23.peg.1795_168374	rq24.peg.4580_177918	rq25.peg.2615_182411	rq26.peg.2521_189045	rq27.peg.138_193942	rq28.peg.6654_206879	re30.peg.6038_165707	rq29.peg.1422_210142
189	group_11223	Possible oxidoreductase	30	30	1	312	4068				440	1262	1222	re01.peg.2560_2560	re02.peg.4524_11705	re03.peg.1525_15751	re05.peg.3699_32162	re06.peg.952_35980	re07.peg.2636_44849	re08.peg.3681_52066	re09.peg.4814_59696	re14.peg.1745_97574	re15.peg.2601_105252	re17.peg.1858_120764	re18.peg.5218_131053	re19.peg.1690_134236	re20.peg.132_138906	re22.peg.2212_155004	re04.peg.721_22026	re10.peg.8738_70313	re11.peg.4095_74819	re12.peg.7449_86935	re13.peg.243_88875	re16.peg.5537_117471	re21.peg.2274_148350	rq23.peg.1794_168373	rq24.peg.4581_177919	rq25.peg.2614_182410	rq26.peg.2522_189046	rq27.peg.139_193943	rq28.peg.6655_206880	re30.peg.6037_165706	rq29.peg.1423_210143
190	group_11227	Glycosyltransferase	30	30	1	312	4071				740	1184	1169	re01.peg.2562_2562	re02.peg.4522_11703	re03.peg.1527_15753	re05.peg.3697_32160	re06.peg.954_35982	re07.peg.2634_44847	re08.peg.3683_52068	re09.peg.4816_59698	re14.peg.1743_97572	re15.peg.2599_105250	re17.peg.1860_120766	re18.peg.5220_131055	re19.peg.1688_134234	re20.peg.134_138908	re22.peg.2210_155002	re04.peg.723_22028	re10.peg.8735_70310	re11.peg.4097_74821	re12.peg.7452_86938	re13.peg.241_88873	re16.peg.5535_117469	re21.peg.2276_148352	rq23.peg.1792_168371	rq24.peg.4583_177921	rq25.peg.2612_182408	rq26.peg.2524_189048	rq27.peg.141_193945	rq28.peg.6657_206882	re30.peg.6035_165704	rq29.peg.1425_210145
191	group_11230	Branched-chain amino acid transport ATP-binding protein LivF (TC 3.A.1.4.1)	30	30	1	312	4088				413	758	737	re01.peg.2573_2573	re02.peg.4511_11692	re03.peg.1538_15764	re05.peg.3686_32149	re06.peg.965_35993	re07.peg.2623_44836	re08.peg.3694_52079	re09.peg.4827_59709	re14.peg.1732_97561	re15.peg.2584_105235	re17.peg.1871_120777	re18.peg.5232_131067	re19.peg.1677_134223	re20.peg.145_138919	re22.peg.2199_154991	re04.peg.734_22039	re10.peg.8193_69768	re11.peg.4112_74836	re12.peg.7465_86951	re13.peg.230_88862	re16.peg.5524_117458	re21.peg.2287_148363	rq23.peg.1781_168360	rq24.peg.4594_177932	rq25.peg.2601_182397	rq26.peg.2535_189059	rq27.peg.152_193956	rq28.peg.6671_206896	re30.peg.6024_165693	rq29.peg.1436_210156
192	group_11237	Exopolyphosphatase	30	30	1	312	4211				407	866	835	re01.peg.2641_2641	re02.peg.4432_11613	re03.peg.1609_15835	re05.peg.3614_32077	6666666.340933.peg.179_35207	re07.peg.2552_44765	re08.peg.4314_52699	re09.peg.4899_59781	re14.peg.1662_97491	re15.peg.2495_105146	re17.peg.1942_120848	re18.peg.4804_130639	re19.peg.1606_134152	re20.peg.216_138990	re22.peg.2127_154919	re04.peg.802_22107	re10.peg.7008_68583	re11.peg.6038_76762	re12.peg.7213_86699	re13.peg.159_88791	re16.peg.5456_117390	re21.peg.2357_148433	rq23.peg.1712_168291	rq24.peg.4664_178002	rq25.peg.2529_182325	rq26.peg.2606_189130	rq27.peg.223_194027	rq28.peg.4521_204747	re30.peg.5954_165623	rq29.peg.5712_214432
193	group_11239	Alpha-ketoglutarate-dependent taurine dioxygenase	30	30	1	312	4235				575	1031	973	re01.peg.2658_2658	re02.peg.4413_11594	re03.peg.1627_15853	re05.peg.3596_32059	6666666.340933.peg.161_35189	re07.peg.2534_44747	re08.peg.4331_52716	re09.peg.4917_59799	re14.peg.1644_97473	re15.peg.2471_105122	re17.peg.1960_120866	re18.peg.4787_130622	re19.peg.1589_134135	re20.peg.234_139008	re22.peg.2108_154900	re04.peg.819_22124	re10.peg.7033_68608	re11.peg.8163_78887	re12.peg.7191_86677	re13.peg.142_88774	re16.peg.5439_117373	re21.peg.2374_148450	rq23.peg.1695_168274	rq24.peg.4681_178019	rq25.peg.2512_182308	rq26.peg.2623_189147	rq27.peg.240_194044	rq28.peg.4540_204766	re30.peg.5937_165606	rq29.peg.5729_214449
194	group_11243	POSSIBLE CONSERVED TRANSMEMBRANE PROTEIN	30	30	1	312	4279				509	1319	1288	re01.peg.2679_2679	re02.peg.9_7190	re03.peg.1647_15873	re05.peg.3571_32034	6666666.340933.peg.140_35168	re07.peg.2510_44723	re08.peg.4351_52736	re09.peg.4941_59823	re14.peg.1620_97449	re15.peg.2442_105093	re17.peg.1980_120886	re18.peg.4766_130601	re19.peg.1565_134111	re20.peg.254_139028	re22.peg.2086_154878	re04.peg.839_22144	re10.peg.7486_69061	re11.peg.6504_77228	re12.peg.3032_82518	re13.peg.122_88754	re16.peg.5419_117353	re21.peg.1846_147922	rq23.peg.1675_168254	rq24.peg.4309_177647	rq25.peg.2492_182288	rq26.peg.2643_189167	rq27.peg.260_194064	rq28.peg.4565_204791	re30.peg.5917_165586	rq29.peg.5748_214468
195	group_11244	FIG00994809: hypothetical protein	30	30	1	312	4283				221	680	264	re01.peg.2682_2682	re02.peg.13_7194	re03.peg.1650_15876	re05.peg.3568_32031	6666666.340933.peg.137_35165	re07.peg.2507_44720	re08.peg.4354_52739	re09.peg.4944_59826	re14.peg.1617_97446	re15.peg.2438_105089	re17.peg.1983_120889	re18.peg.4763_130598	re19.peg.1562_134108	re20.peg.257_139031	re22.peg.2083_154875	re04.peg.842_22147	re10.peg.7489_69064	re11.peg.6501_77225	re12.peg.3028_82514	re13.peg.119_88751	re16.peg.5416_117350	re21.peg.1843_147919	rq23.peg.1672_168251	rq24.peg.4312_177650	rq25.peg.2489_182285	rq26.peg.2646_189170	rq27.peg.263_194067	rq28.peg.4568_204794	re30.peg.5914_165583	rq29.peg.5751_214471
196	group_11245	hypothetical protein	30	30	1	312	4287				203	413	397	re01.peg.2684_2684	re02.peg.15_7196	re03.peg.1652_15878	re05.peg.3566_32029	6666666.340933.peg.135_35163	re07.peg.2505_44718	re08.peg.4356_52741	re09.peg.4946_59828	re14.peg.1615_97444	re15.peg.2436_105087	re17.peg.1985_120891	re18.peg.4761_130596	re19.peg.1560_134106	re20.peg.259_139033	re22.peg.2081_154873	re04.peg.844_22149	re10.peg.7491_69066	re11.peg.6499_77223	re12.peg.3026_82512	re13.peg.117_88749	re16.peg.5414_117348	re21.peg.1841_147917	rq23.peg.1670_168249	rq24.peg.4314_177652	rq25.peg.2487_182283	rq26.peg.2648_189172	rq27.peg.265_194069	rq28.peg.4570_204796	re30.peg.5912_165581	rq29.peg.5753_214473
197	group_11252	formamidase	30	30	1	312	4306				488	1265	1199	re01.peg.2698_2698	re02.peg.29_7210	re03.peg.1665_15891	re05.peg.3552_32015	6666666.340933.peg.122_35150	re07.peg.2492_44705	re08.peg.4369_52754	re09.peg.4958_59840	re14.peg.1602_97431	re15.peg.2420_105071	re17.peg.1998_120904	re18.peg.4748_130583	re19.peg.1547_134093	re20.peg.274_139048	re22.peg.2069_154861	re04.peg.857_22162	re10.peg.3827_65402	re11.peg.5608_76332	re12.peg.3007_82493	re13.peg.105_88737	re16.peg.5401_117335	re21.peg.1829_147905	rq23.peg.1657_168236	rq24.peg.4326_177664	rq25.peg.2474_182270	rq26.peg.2660_189184	rq27.peg.277_194081	rq28.peg.4588_204814	re30.peg.5899_165568	rq29.peg.5765_214485
198	group_11263	Superoxide dismutase [Cu-Zn] precursor	30	30	1	312	4468				128	701	573	re01.peg.2773_2773	re02.peg.114_7295	re03.peg.1149_15375	re05.peg.3469_31932	re06.peg.5843_40869	re07.peg.2412_44625	re08.peg.4449_52834	re09.peg.5040_59922	re14.peg.1521_97350	re15.peg.8107_110758	re17.peg.6385_125291	re18.peg.4944_130779	re19.peg.1464_134010	re20.peg.355_139129	re22.peg.1987_154779	re04.peg.936_22241	re10.peg.3722_65297	re11.peg.5808_76532	re12.peg.6100_85586	re13.peg.49_88681	re16.peg.5987_117921	re21.peg.5210_151286	rq23.peg.1580_168159	rq24.peg.4403_177741	rq25.peg.2396_182192	rq26.peg.6457_192981	rq27.peg.356_194160	rq28.peg.7402_207627	re30.peg.5821_165490	rq29.peg.2430_211150
199	group_11270	FIG00994944: hypothetical protein	30	30	1	312	24811				551	725	663	re01.peg.2824_2824	re02.peg.5922_13103	re03.peg.4347_18573	re05.peg.4341_32804	re06.peg.1429_36457	re07.peg.5433_47646	re08.peg.2012_50397	re09.peg.3814_58696	re14.peg.2751_98580	re15.peg.4100_106751	re17.peg.4627_123533	re18.peg.5818_131653	re19.peg.2691_135237	re20.peg.4769_143543	re22.peg.3363_156155	re04.peg.5360_26665	re10.peg.8057_69632	re11.peg.7731_78455	re12.peg.7852_87338	re13.peg.1090_89722	re16.peg.3217_115151	re21.peg.2875_148951	rq23.peg.2948_169527	rq24.peg.2235_175573	rq25.peg.3808_183604	rq26.peg.5796_192320	rq27.peg.4857_198661	rq28.peg.382_200608	re30.peg.1460_161129	rq29.peg.4100_212820
200	group_11271	Polyphosphate glucokinase	30	30	1	312	24785				596	821	797	re01.peg.2841_2841	re02.peg.6774_13955	re03.peg.4364_18590	re05.peg.4324_32787	re06.peg.1411_36439	re07.peg.5450_47663	re08.peg.1995_50380	re09.peg.3833_58715	re14.peg.2733_98562	re15.peg.4077_106728	re17.peg.4644_123550	re18.peg.5801_131636	re19.peg.2673_135219	re20.peg.4752_143526	re22.peg.3346_156138	re04.peg.5377_26682	re10.peg.7155_68730	re11.peg.4354_75078	re12.peg.6363_85849	re13.peg.1107_89739	re16.peg.3199_115133	re21.peg.2857_148933	rq23.peg.2930_169509	rq24.peg.2252_175590	rq25.peg.3791_183587	rq26.peg.5813_192337	rq27.peg.4874_198678	rq28.peg.399_200625	re30.peg.1443_161112	rq29.peg.4083_212803
201	group_11284	peptidase C60 sortase A and B	30	30	1	312	24680				503	671	656	re01.peg.2897_2897	re02.peg.5177_12358	re03.peg.5752_19978	re05.peg.5259_33722	re06.peg.1724_36752	re07.peg.5942_48155	re08.peg.1940_50325	re09.peg.3890_58772	re14.peg.2678_98507	re15.peg.4001_106652	re17.peg.2050_120956	re18.peg.4243_130078	re19.peg.2617_135163	re20.peg.4697_143471	re22.peg.3290_156082	re04.peg.1291_22596	re10.peg.1717_63292	re11.peg.4288_75012	re12.peg.8355_87841	re13.peg.5129_93761	re16.peg.4034_115968	re21.peg.2422_148498	rq23.peg.2877_169456	rq24.peg.2305_175643	rq25.peg.3738_183534	rq26.peg.6345_192869	rq27.peg.4927_198731	rq28.peg.3677_203903	re30.peg.1391_161060	rq29.peg.5587_214307
202	group_11286	tRNA dimethylallyltransferase	30	30	1	312	24679				506	926	898	re01.peg.2898_2898	re02.peg.5178_12359	re03.peg.5751_19977	re05.peg.5258_33721	re06.peg.1725_36753	re07.peg.5943_48156	re08.peg.1939_50324	re09.peg.3891_58773	re14.peg.2677_98506	re15.peg.4000_106651	re17.peg.2051_120957	re18.peg.4242_130077	re19.peg.2616_135162	re20.peg.4696_143470	re22.peg.3289_156081	re04.peg.1292_22597	re10.peg.1716_63291	re11.peg.4287_75011	re12.peg.8354_87840	re13.peg.5128_93760	re16.peg.4035_115969	re21.peg.2423_148499	rq23.peg.2876_169455	rq24.peg.2306_175644	rq25.peg.3737_183533	rq26.peg.6346_192870	rq27.peg.4928_198732	rq28.peg.3676_203902	re30.peg.1390_161059	rq29.peg.5586_214306
203	group_11300	Phage shock protein A (IM30) suppresses sigma54-dependent transcription	30	30	1	312	24635				329	812	782	re01.peg.2921_2921	re02.peg.5205_12386	re03.peg.5729_19955	re05.peg.5235_33698	re06.peg.1748_36776	re07.peg.2076_44289	re08.peg.1916_50301	re09.peg.3914_58796	re14.peg.2654_98483	re15.peg.3966_106617	re17.peg.2072_120978	re18.peg.4218_130053	re19.peg.2593_135139	re20.peg.4673_143447	re22.peg.3266_156058	re04.peg.1313_22618	re10.peg.1689_63264	re11.peg.7047_77771	re12.peg.3656_83142	re13.peg.5107_93739	re16.peg.4056_115990	re21.peg.2444_148520	rq23.peg.2855_169434	rq24.peg.2328_175666	rq25.peg.3716_183512	rq26.peg.6367_192891	rq27.peg.4949_198753	rq28.peg.3651_203877	re30.peg.1369_161038	rq29.peg.5565_214285
204	group_11302	NADH-ubiquinone oxidoreductase chain C	30	30	1	312	24552				245	857	652	re01.peg.2938_2938	re02.peg.5223_12404	re03.peg.5712_19938	re05.peg.5217_33680	re06.peg.1765_36793	re07.peg.2059_44272	re08.peg.1899_50284	re09.peg.3931_58813	re14.peg.2637_98466	re15.peg.3944_106595	re17.peg.2090_120996	re18.peg.4200_130035	re19.peg.2576_135122	re20.peg.4656_143430	re22.peg.3248_156040	re04.peg.1332_22637	re10.peg.1663_63238	re11.peg.2304_73028	re12.peg.3683_83169	re13.peg.5089_93721	re16.peg.4073_116007	re21.peg.2462_148538	rq23.peg.2838_169417	rq24.peg.2346_175684	rq25.peg.3698_183494	rq26.peg.6968_193492	rq27.peg.4966_198770	rq28.peg.3630_203856	re30.peg.1351_161020	rq29.peg.5548_214268
205	group_11304	Isochorismatase of siderophore biosynthesis	30	30	1	312	24476				431	647	633	re01.peg.2964_2964	re02.peg.5261_12442	re03.peg.5686_19912	re05.peg.5190_33653	re06.peg.1791_36819	re07.peg.2033_44246	re08.peg.5284_53669	re09.peg.3957_58839	re14.peg.2608_98437	re15.peg.3896_106547	re17.peg.2114_121020	re18.peg.4171_130006	re19.peg.2549_135095	re20.peg.4630_143404	re22.peg.3223_156015	re04.peg.1357_22662	re10.peg.1617_63192	re11.peg.2262_72986	re12.peg.3149_82635	re13.peg.5066_93698	re16.peg.4097_116031	re21.peg.2487_148563	rq23.peg.2813_169392	rq24.peg.2371_175709	rq25.peg.3673_183469	rq26.peg.910_187434	rq27.peg.4991_198795	rq28.peg.3593_203819	re30.peg.1326_160995	rq29.peg.5524_214244
206	group_11328	Methionine aminopeptidase	30	30	1	312	24226				710	857	802	re01.peg.3074_3074	re02.peg.2564_9745	re03.peg.5570_19796	re05.peg.2409_30872	re06.peg.6588_41614	re07.peg.1923_44136	re08.peg.5221_53606	re09.peg.4067_58949	re14.peg.2492_98321	re15.peg.3728_106379	re17.peg.2222_121128	re18.peg.3063_128898	re19.peg.2441_134987	re20.peg.4497_143271	re22.peg.3109_155901	re04.peg.1476_22781	re10.peg.1936_63511	re11.peg.6678_77402	re12.peg.2515_82001	re13.peg.4948_93580	re16.peg.4209_116143	re21.peg.3032_149108	rq23.peg.2706_169285	rq24.peg.2480_175818	rq25.peg.3567_183363	rq26.peg.1014_187538	rq27.peg.5100_198904	rq28.peg.7010_207235	re30.peg.1222_160891	rq29.peg.5415_214135
207	group_11334	2-aminoethylphosphonate ABC transporter permease protein I (TC 3.A.1.9.1)	30	30	1	312	24160				659	902	893	re01.peg.3103_3103	re02.peg.2531_9712	re03.peg.5540_19766	re05.peg.2380_30843	re06.peg.6558_41584	re07.peg.1893_44106	re08.peg.5251_53636	re09.peg.4096_58978	re14.peg.2463_98292	re15.peg.3688_106339	re17.peg.2252_121158	re18.peg.3094_128929	re19.peg.2412_134958	re20.peg.4467_143241	re22.peg.3079_155871	re04.peg.1506_22811	re10.peg.1981_63556	re11.peg.3539_74263	re12.peg.2474_81960	re13.peg.4919_93551	re16.peg.4238_116172	re21.peg.3002_149078	rq23.peg.2675_169254	rq24.peg.2509_175847	rq25.peg.3537_183333	rq26.peg.1043_187567	rq27.peg.5130_198934	rq28.peg.5687_205912	re30.peg.1193_160862	rq29.peg.5385_214105
208	group_11338	ATPases involved in chromosome partitioning	30	30	1	312	24128				851	1094	914	re01.peg.3123_3123	re02.peg.2506_9687	re03.peg.5519_19745	re05.peg.2360_30823	re06.peg.6537_41563	re07.peg.1873_44086	re08.peg.5271_53656	re09.peg.4116_58998	re14.peg.2443_98272	re15.peg.3662_106313	re17.peg.2272_121178	re18.peg.3115_128950	re19.peg.2392_134938	re20.peg.4447_143221	re22.peg.3058_155850	re04.peg.1526_22831	re10.peg.2009_63584	re11.peg.3566_74290	re12.peg.2444_81930	re13.peg.4899_93531	re16.peg.4258_116192	re21.peg.2982_149058	rq23.peg.2654_169233	rq24.peg.2529_175867	rq25.peg.3517_183313	rq26.peg.1063_187587	rq27.peg.5150_198954	rq28.peg.5710_205935	re30.peg.1173_160842	rq29.peg.5365_214085
209	group_11339	Iron utilization protein	30	30	1	312	24119				374	770	756	re01.peg.3126_3126	re02.peg.2502_9683	re03.peg.5516_19742	re05.peg.2357_30820	re06.peg.6534_41560	re07.peg.1869_44082	re08.peg.5274_53659	re09.peg.4119_59001	re14.peg.2440_98269	re15.peg.3658_106309	re17.peg.2276_121182	re18.peg.3119_128954	re19.peg.2389_134935	re20.peg.4444_143218	re22.peg.3055_155847	re04.peg.1530_22835	re10.peg.2013_63588	re11.peg.3571_74295	re12.peg.2439_81925	re13.peg.4895_93527	re16.peg.4262_116196	re21.peg.2978_149054	rq23.peg.2651_169230	rq24.peg.2533_175871	rq25.peg.3513_183309	rq26.peg.1067_187591	rq27.peg.5154_198958	rq28.peg.5713_205938	re30.peg.1169_160838	rq29.peg.5361_214081
210	group_11344	Aldehyde dehydrogenase B	30	30	1	312	17387				401	1445	1331	re01.peg.3159_3159	re02.peg.1075_8256	re03.peg.4837_19063	re05.peg.3036_31499	re06.peg.6814_41840	re07.peg.5643_47856	re08.peg.5387_53772	re09.peg.27_54909	re14.peg.616_96445	re15.peg.902_103553	re17.peg.517_119423	re18.peg.4480_130315	re19.peg.565_133111	re20.peg.2909_141683	re22.peg.1029_153821	re04.peg.531_21836	re10.peg.5082_66657	re11.peg.5225_75949	re12.peg.7367_86853	re13.peg.2063_90695	re16.peg.5908_117842	re21.peg.1448_147524	rq23.peg.671_167250	rq24.peg.80_173418	rq25.peg.3402_183198	rq26.peg.3346_189870	rq27.peg.1298_195102	rq28.peg.3802_204028	re30.peg.2792_162461	rq29.peg.680_209400
211	group_11347	secreted lipase	30	30	1	312	16750				662	857	850	re01.peg.3244_3244	re02.peg.1001_8182	re03.peg.6301_20527	re05.peg.2958_31421	re06.peg.5876_40902	re07.peg.4585_46798	re08.peg.4810_53195	re09.peg.5854_60736	re14.peg.687_96516	re15.peg.1070_103721	re17.peg.443_119349	re18.peg.1369_127205	re19.peg.641_133187	re20.peg.2999_141773	re22.peg.1097_153889	re04.peg.464_21769	re10.peg.4433_66008	re11.peg.364_71088	re12.peg.1808_81294	re13.peg.1973_90605	re16.peg.5284_117218	re21.peg.5577_151653	rq23.peg.738_167317	rq24.peg.172_173510	rq25.peg.3338_183134	rq26.peg.5013_191537	rq27.peg.1195_194999	rq28.peg.4946_205172	re30.peg.4980_164649	rq29.peg.613_209333
212	group_11348	Cytosine/adenosine deaminases	30	30	1	312	16746				479	584	482	re01.peg.3247_3247	re02.peg.998_8179	re03.peg.6298_20524	re05.peg.2955_31418	re06.peg.3289_38316	re07.peg.4588_46801	re08.peg.4807_53192	re09.peg.5851_60733	re14.peg.690_96519	re15.peg.1074_103725	re17.peg.440_119346	re18.peg.1372_127208	re19.peg.644_133190	re20.peg.3002_141776	re22.peg.1100_153892	re04.peg.461_21766	re10.peg.4430_66005	re11.peg.369_71093	re12.peg.1812_81298	re13.peg.1970_90602	re16.peg.5281_117215	re21.peg.5580_151656	rq23.peg.741_167320	rq24.peg.175_173513	rq25.peg.3335_183131	rq26.peg.5016_191540	rq27.peg.1192_194996	rq28.peg.4949_205175	re30.peg.4983_164652	rq29.peg.610_209330
213	group_11349	virulence factor Mce family protein	30	30	1	312	16658				353	1010	987	re01.peg.3294_3294	re02.peg.969_8150	re03.peg.6268_20494	re05.peg.2925_31388	re06.peg.3320_38347	re07.peg.4639_46852	re08.peg.4777_53162	re09.peg.5820_60702	re14.peg.720_96549	re15.peg.1112_103763	re17.peg.410_119316	re18.peg.1403_127239	re19.peg.674_133220	re20.peg.3032_141806	re22.peg.1130_153922	re04.peg.411_21716	re10.peg.4394_65969	re11.peg.435_71159	re12.peg.1853_81339	re13.peg.1940_90572	re16.peg.5231_117165	re21.peg.5609_151685	rq23.peg.771_167350	rq24.peg.206_173544	rq25.peg.3305_183101	rq26.peg.5047_191571	rq27.peg.1162_194966	rq28.peg.4983_205209	re30.peg.5013_164682	rq29.peg.580_209300
214	group_11356	Sterol desaturase	30	30	1	312	16350				809	911	848	re01.peg.3350_3350	re02.peg.908_8089	re03.peg.6367_20593	re05.peg.2865_31328	re06.peg.3378_38405	re07.peg.4697_46910	re08.peg.1872_50257	re09.peg.5763_60645	re14.peg.777_96606	re15.peg.1340_103991	re17.peg.351_119257	re18.peg.1463_127299	re19.peg.731_133277	re20.peg.3089_141863	re22.peg.1187_153979	re04.peg.354_21659	re10.peg.6245_67820	re11.peg.505_71229	re12.peg.406_79892	re13.peg.1882_90514	re16.peg.2622_114556	re21.peg.5665_151741	rq23.peg.828_167407	rq24.peg.263_173601	rq25.peg.3247_183043	rq26.peg.5104_191628	rq27.peg.1104_194908	rq28.peg.995_201221	re30.peg.5069_164738	rq29.peg.4841_213561
215	group_11361	FIG01194994: hypothetical protein	30	30	1	312	16286				755	1274	1241	re01.peg.3378_3378	re02.peg.870_8051	re03.peg.6397_20623	re05.peg.2833_31296	re06.peg.3408_38435	re07.peg.4735_46948	re08.peg.1832_50217	re09.peg.5733_60615	re14.peg.808_96637	re15.peg.1382_104033	re17.peg.321_119227	re18.peg.1503_127339	re19.peg.760_133306	re20.peg.3127_141901	re22.peg.1216_154008	re04.peg.325_21630	re10.peg.1088_62663	re11.peg.539_71263	re12.peg.443_79929	re13.peg.1853_90485	re16.peg.2651_114585	re21.peg.5694_151770	rq23.peg.857_167436	rq24.peg.291_173629	rq25.peg.3218_183014	rq26.peg.5133_191657	rq27.peg.1076_194880	rq28.peg.963_201189	re30.peg.5098_164767	rq29.peg.4869_213589
216	group_11363	FIG01001626: hypothetical protein	30	30	1	312	16278				464	728	717	re01.peg.3383_3383	re02.peg.864_8045	re03.peg.6403_20629	re05.peg.2827_31290	re06.peg.3414_38441	re07.peg.4741_46954	re08.peg.1826_50211	re09.peg.5727_60609	re14.peg.814_96643	re15.peg.1391_104042	re17.peg.315_119221	re18.peg.1511_127347	re19.peg.766_133312	re20.peg.3133_141907	re22.peg.1222_154014	re04.peg.319_21624	re10.peg.1078_62653	re11.peg.546_71270	re12.peg.454_79940	re13.peg.1847_90479	re16.peg.2657_114591	re21.peg.5700_151776	rq23.peg.863_167442	rq24.peg.296_173634	rq25.peg.3213_183009	rq26.peg.5139_191663	rq27.peg.1071_194875	rq28.peg.955_201181	re30.peg.5104_164773	rq29.peg.4875_213595
217	group_11375	Transcriptional regulator TetR family	30	30	1	312	16106				488	677	657	re01.peg.3424_3424	re02.peg.816_7997	re03.peg.6449_20675	re05.peg.2786_31249	re06.peg.3461_38488	re07.peg.4788_47001	re08.peg.1741_50126	re09.peg.5680_60562	re14.peg.861_96690	re15.peg.1451_104102	re17.peg.269_119175	re18.peg.1560_127396	re19.peg.814_133360	re20.peg.3181_141955	re22.peg.1354_154146	re04.peg.272_21577	re10.peg.1016_62591	re11.peg.2848_73572	re12.peg.526_80012	re13.peg.1800_90432	re16.peg.2703_114637	re21.peg.5746_151822	rq23.peg.910_167489	rq24.peg.5187_178525	rq25.peg.3168_182964	rq26.peg.5185_191709	rq27.peg.1019_194823	rq28.peg.904_201130	re30.peg.5150_164819	rq29.peg.4922_213642
218	group_11379	hypothetical protein	30	30	1	312	16051				281	428	400	re01.peg.3456_3456	re02.peg.782_7963	re03.peg.6483_20709	re05.peg.2752_31215	re06.peg.3495_38522	re07.peg.4822_47035	re08.peg.1708_50093	re09.peg.5647_60529	re14.peg.895_96724	re15.peg.1496_104147	re17.peg.234_119140	re18.peg.1597_127433	re19.peg.847_133393	re20.peg.3216_141990	re22.peg.1387_154179	re04.peg.238_21543	re10.peg.975_62550	re11.peg.2804_73528	re12.peg.567_80053	re13.peg.1767_90399	re16.peg.2737_114671	re21.peg.5778_151854	rq23.peg.944_167523	rq24.peg.5221_178559	rq25.peg.3135_182931	rq26.peg.6501_193025	rq27.peg.986_194790	rq28.peg.864_201090	re30.peg.5183_164852	rq29.peg.4955_213675
219	group_11385	possible transcriptional regulator	30	30	1	312	26580				353	365	360	re01.peg.3492_3492	re02.peg.5436_12617	re03.peg.2115_16341	re05.peg.1553_30016	re06.peg.2567_37594	re07.peg.3102_45315	re08.peg.5751_54136	re09.peg.2307_57189	re14.peg.4250_100079	re15.peg.6273_108924	re17.peg.3556_122462	re18.peg.1313_127149	re19.peg.4195_136741	re20.peg.597_139371	re22.peg.4972_157764	re04.peg.3268_24573	re10.peg.5213_66788	re11.peg.4138_74862	re12.peg.6274_85760	re13.peg.6427_95059	re16.peg.2362_114296	re21.peg.6339_152415	rq23.peg.4536_171115	rq24.peg.3682_177020	rq25.peg.180_179976	rq26.peg.2050_188574	rq27.peg.5730_199534	rq28.peg.1849_202075	re30.peg.3130_162799	rq29.peg.1756_210476
220	group_11388	PROBABLE CONSERVED TRANSMEMBRANE PROTEIN	30	30	1	312	26605				500	734	712	re01.peg.3505_3505	re02.peg.5449_12630	re03.peg.2093_16319	re05.peg.1540_30003	re06.peg.2581_37608	re07.peg.3115_45328	re08.peg.5738_54123	re09.peg.2294_57176	re14.peg.4263_100092	re15.peg.6287_108938	re17.peg.3569_122475	re18.peg.1300_127136	re19.peg.4209_136755	re20.peg.610_139384	re22.peg.4985_157777	re04.peg.3254_24559	re10.peg.8622_70197	re11.peg.8235_78959	re12.peg.8514_88000	re13.peg.6440_95072	re16.peg.2375_114309	re21.peg.6543_152619	rq23.peg.4551_171130	rq24.peg.1933_175271	rq25.peg.195_179991	rq26.peg.2037_188561	rq27.peg.3684_197488	rq28.peg.1862_202088	re30.peg.3143_162812	rq29.peg.923_209643
221	group_11392	LSU ribosomal protein L31p	30	30	1	312	26635				191	254	250	re01.peg.3520_3520	re02.peg.5465_12646	re03.peg.2078_16304	re05.peg.1525_29988	re06.peg.2596_37623	re07.peg.3130_45343	re08.peg.5723_54108	re09.peg.2279_57161	re14.peg.4278_100107	re15.peg.6305_108956	re17.peg.3585_122491	re18.peg.1285_127121	re19.peg.4225_136771	re20.peg.625_139399	re22.peg.5000_157792	re04.peg.3239_24544	re10.peg.8896_70471	re11.peg.8479_79203	re12.peg.8848_88334	re13.peg.6456_95088	re16.peg.2390_114324	re21.peg.6527_152603	rq23.peg.4567_171146	rq24.peg.1917_175255	rq25.peg.212_180008	rq26.peg.2021_188545	rq27.peg.3668_197472	rq28.peg.1877_202103	re30.peg.3158_162827	rq29.peg.939_209659
222	group_11393	FIG00998572: hypothetical protein	30	30	1	312	26646				1115	1622	1518	re01.peg.3529_3529	re02.peg.5475_12656	re03.peg.2069_16295	re05.peg.1515_29978	re06.peg.2605_37632	re07.peg.3139_45352	re08.peg.5714_54099	re09.peg.2270_57152	re14.peg.4287_100116	re15.peg.6317_108968	re17.peg.3594_122500	re18.peg.1276_127112	re19.peg.4234_136780	re20.peg.634_139408	re22.peg.5009_157801	re04.peg.3230_24535	re10.peg.7648_69223	re11.peg.7257_77981	re12.peg.6998_86484	re13.peg.6548_95180	re16.peg.2399_114333	re21.peg.6518_152594	rq23.peg.4576_171155	rq24.peg.1908_175246	rq25.peg.221_180017	rq26.peg.2012_188536	rq27.peg.3659_197463	rq28.peg.1886_202112	re30.peg.3167_162836	rq29.peg.948_209668
223	group_11410	Phage peptidoglycan binding endopeptidase	30	30	1	312	26753				401	770	751	re01.peg.3592_3592	re02.peg.6547_13728	re03.peg.2006_16232	re05.peg.1452_29915	re06.peg.2668_37695	re07.peg.3204_45417	re08.peg.1291_49676	re09.peg.2206_57088	re14.peg.4351_100180	re15.peg.6401_109052	re17.peg.631_119537	re18.peg.1211_127047	re19.peg.4298_136844	re20.peg.697_139471	re22.peg.5072_157864	re04.peg.3167_24472	re10.peg.4525_66100	re11.peg.3032_73756	re12.peg.2665_82151	re13.peg.6612_95244	re16.peg.4493_116427	re21.peg.6455_152531	rq23.peg.4640_171219	rq24.peg.1846_175184	rq25.peg.283_180079	rq26.peg.1949_188473	rq27.peg.3597_197401	rq28.peg.1961_202187	re30.peg.3229_162898	rq29.peg.1012_209732
224	group_11415	Sporulation regulatory protein WhiD	30	30	1	312	26894				191	368	293	re01.peg.3701_3701	re02.peg.3868_11049	re03.peg.1960_16186	re05.peg.1393_29856	re06.peg.2715_37742	re07.peg.3247_45460	re08.peg.1261_49646	re09.peg.2160_57042	re14.peg.4397_100226	re15.peg.6471_109122	re17.peg.682_119588	re18.peg.1166_127002	re19.peg.4350_136896	re20.peg.740_139514	re22.peg.5125_157917	re04.peg.3098_24403	re10.peg.6814_68389	re11.peg.3092_73816	re12.peg.1251_80737	re13.peg.6635_95267	re16.peg.4537_116471	re21.peg.32_146108	rq23.peg.4683_171262	rq24.peg.1800_175138	rq25.peg.307_180103	rq26.peg.1904_188428	rq27.peg.3554_197358	rq28.peg.2015_202241	re30.peg.3275_162944	rq29.peg.1035_209755
225	group_11418	FIG00994049: hypothetical protein	30	30	1	312	26907				188	371	348	re01.peg.3708_3708	re02.peg.3860_11041	re03.peg.1953_16179	re05.peg.1386_29849	re06.peg.2722_37749	re07.peg.3254_45467	re08.peg.1254_49639	re09.peg.2153_57035	re14.peg.4406_100235	re15.peg.6482_109133	re17.peg.689_119595	re18.peg.1159_126995	re19.peg.4357_136903	re20.peg.747_139521	re22.peg.5132_157924	re04.peg.3091_24396	re10.peg.6803_68378	re11.peg.3197_73921	re12.peg.1258_80744	re13.peg.6642_95274	re16.peg.4544_116478	re21.peg.39_146115	rq23.peg.4690_171269	rq24.peg.1793_175131	rq25.peg.314_180110	rq26.peg.1897_188421	rq27.peg.3547_197351	rq28.peg.2025_202251	re30.peg.3282_162951	rq29.peg.1042_209762
226	group_11419	Cys-tRNA(Pro) deacylase YbaK	30	30	1	312	26946				587	698	628	re01.peg.3730_3730	re02.peg.3835_11016	re03.peg.1929_16155	re05.peg.1363_29826	re06.peg.2743_37770	re07.peg.3276_45489	re08.peg.1233_49618	re09.peg.2131_57013	re14.peg.4428_100257	re15.peg.6506_109157	re17.peg.710_119616	re18.peg.1137_126973	re19.peg.4379_136925	re20.peg.768_139542	re22.peg.5153_157945	re04.peg.3070_24375	re10.peg.4836_66411	re11.peg.3221_73945	re12.peg.1283_80769	re13.peg.6663_95295	re16.peg.4566_116500	re21.peg.60_146136	rq23.peg.4711_171290	rq24.peg.1772_175110	rq25.peg.336_180132	rq26.peg.1876_188400	rq27.peg.3526_197330	rq28.peg.2047_202273	re30.peg.3303_162972	rq29.peg.1063_209783
227	group_11422	Methyltransferase	30	30	1	312	26960				551	596	594	re01.peg.3738_3738	re02.peg.3828_11009	re03.peg.1922_16148	re05.peg.1356_29819	re06.peg.2750_37777	re07.peg.3283_45496	re08.peg.1226_49611	re09.peg.2124_57006	re14.peg.4435_100264	re15.peg.6518_109169	re17.peg.1608_120514	re18.peg.1130_126966	re19.peg.4386_136932	re20.peg.775_139549	re22.peg.5160_157952	re04.peg.3063_24368	re10.peg.4828_66403	re11.peg.3231_73955	re12.peg.1294_80780	re13.peg.4330_92962	re16.peg.4639_116573	re21.peg.67_146143	rq23.peg.4718_171297	rq24.peg.1765_175103	rq25.peg.343_180139	rq26.peg.1869_188393	rq27.peg.3519_197323	rq28.peg.2279_202505	re30.peg.3310_162979	rq29.peg.4400_213120
228	group_11426	Dihydrolipoamide dehydrogenase of pyruvate dehydrogenase complex	30	30	1	312	27049				1394	1415	1397	re01.peg.3778_3778	re02.peg.3786_10967	re03.peg.1881_16107	re05.peg.1318_29781	re06.peg.2788_37815	re07.peg.3321_45534	re08.peg.1188_49573	re09.peg.2086_56968	re14.peg.4473_100302	re15.peg.6571_109222	re17.peg.1570_120476	re18.peg.1091_126927	re19.peg.4424_136970	re20.peg.813_139587	re22.peg.5197_157989	re04.peg.3023_24328	re10.peg.4776_66351	re11.peg.3276_74000	re12.peg.1347_80833	re13.peg.4371_93003	re16.peg.4678_116612	re21.peg.105_146181	rq23.peg.4759_171338	rq24.peg.1725_175063	rq25.peg.383_180179	rq26.peg.1829_188353	rq27.peg.3479_197283	rq28.peg.2322_202548	re30.peg.3350_163019	rq29.peg.4440_213160
229	group_11427	Acetoin dehydrogenase E1 component alpha-subunit	30	30	1	312	27053				893	1055	1029	re01.peg.3781_3781	re02.peg.3781_10962	re03.peg.1878_16104	re05.peg.1315_29778	re06.peg.2791_37818	re07.peg.3324_45537	re08.peg.1185_49570	re09.peg.2083_56965	re14.peg.4476_100305	re15.peg.6575_109226	re17.peg.1567_120473	re18.peg.1087_126923	re19.peg.4427_136973	re20.peg.816_139590	re22.peg.5200_157992	re04.peg.3020_24325	re10.peg.4772_66347	re11.peg.5794_76518	re12.peg.1350_80836	re13.peg.4374_93006	re16.peg.4681_116615	re21.peg.108_146184	rq23.peg.4762_171341	rq24.peg.1722_175060	rq25.peg.386_180182	rq26.peg.1826_188350	rq27.peg.3476_197280	rq28.peg.2325_202551	re30.peg.3353_163022	rq29.peg.4443_213163
230	group_11428	Citrate synthase (si)	30	30	1	312	27077				623	1298	1185	re01.peg.3796_3796	re02.peg.3766_10947	re03.peg.1864_16090	re05.peg.1301_29764	re06.peg.2805_37832	re07.peg.3338_45551	re08.peg.1171_49556	re09.peg.2069_56951	re14.peg.4490_100319	re15.peg.6595_109246	re17.peg.1552_120458	re18.peg.1072_126908	re19.peg.4441_136987	re20.peg.830_139604	re22.peg.5214_158006	re04.peg.3005_24310	re10.peg.4751_66326	re11.peg.5776_76500	re12.peg.1372_80858	re13.peg.4389_93021	re16.peg.4695_116629	re21.peg.122_146198	rq23.peg.4777_171356	rq24.peg.1707_175045	rq25.peg.400_180196	rq26.peg.1811_188335	rq27.peg.3461_197265	rq28.peg.2341_202567	re30.peg.3368_163037	rq29.peg.4458_213178
231	group_11436	Putative Dyp-type peroxidase associated with bacterial analog of Cox17 protein	30	30	1	312	15552				1106	1217	1176	re01.peg.3849_3849	re02.peg.508_7689	re03.peg.6721_20947	re05.peg.2499_30962	re06.peg.6961_41987	re07.peg.5030_47243	re08.peg.1462_49847	re09.peg.5407_60289	re14.peg.1144_96973	re15.peg.1849_104500	re17.peg.5845_124751	re18.peg.3436_129271	re19.peg.1092_133638	re20.peg.3468_142242	re22.peg.1634_154426	re04.peg.5676_26981	re10.peg.3494_65069	re11.peg.3152_73876	re12.peg.5781_85267	re13.peg.945_89577	re16.peg.6394_118328	re21.peg.6026_152102	rq23.peg.1190_167769	rq24.peg.3754_177092	rq25.peg.2895_182691	rq26.peg.2191_188715	rq27.peg.742_194546	rq28.peg.571_200797	re30.peg.5427_165096	rq29.peg.5199_213919
232	group_11437	putative cytochrome P450 hydroxylase	30	30	1	312	15601				1133	1223	1164	re01.peg.3871_3871	re02.peg.532_7713	re03.peg.6700_20926	re05.peg.2520_30983	re06.peg.6938_41964	re07.peg.5011_47224	re08.peg.1483_49868	re09.peg.5428_60310	re14.peg.1122_96951	re15.peg.1821_104472	re17.peg.14_118920	re18.peg.3415_129250	re19.peg.1070_133616	re20.peg.3448_142222	re22.peg.1615_154407	re04.peg.16_21321	re10.peg.3462_65037	re11.peg.3178_73902	re12.peg.5749_85235	re13.peg.1544_90176	re16.peg.6420_118354	re21.peg.6005_152081	rq23.peg.1166_167745	rq24.peg.3773_177111	rq25.peg.2914_182710	rq26.peg.2211_188735	rq27.peg.761_194565	rq28.peg.596_200822	re30.peg.5408_165077	rq29.peg.5178_213898
233	group_11439	Acyl dehydratase	30	30	1	312	15672				620	866	850	re01.peg.3903_3903	re02.peg.562_7743	re03.peg.6674_20900	re05.peg.2549_31012	re06.peg.6910_41936	re07.peg.4983_47196	re08.peg.1511_49896	re09.peg.5455_60337	re14.peg.1096_96925	re15.peg.1782_104433	re17.peg.43_118949	re18.peg.3385_129220	re19.peg.1044_133590	re20.peg.3421_142195	re22.peg.1587_154379	re04.peg.44_21349	re10.peg.8609_70184	re11.peg.6400_77124	re12.peg.8228_87714	re13.peg.1571_90203	re16.peg.6447_118381	re21.peg.5978_152054	rq23.peg.1139_167718	rq24.peg.3803_177141	rq25.peg.2940_182736	rq26.peg.2241_188765	rq27.peg.792_194596	rq28.peg.627_200853	re30.peg.5378_165047	rq29.peg.5151_213871
234	group_11444	Isochorismate synthase	30	30	1	312	15677				1058	1088	1087	re01.peg.3907_3907	re02.peg.566_7747	re03.peg.6670_20896	re05.peg.2553_31016	re06.peg.6906_41932	re07.peg.4979_47192	re08.peg.1515_49900	re09.peg.5459_60341	re14.peg.1092_96921	re15.peg.1778_104429	re17.peg.47_118953	re18.peg.3381_129216	re19.peg.1040_133586	re20.peg.3417_142191	re22.peg.1583_154375	re04.peg.48_21353	re10.peg.8615_70190	re11.peg.6395_77119	re12.peg.8233_87719	re13.peg.1575_90207	re16.peg.6451_118385	re21.peg.5974_152050	rq23.peg.1135_167714	rq24.peg.3807_177145	rq25.peg.2944_182740	rq26.peg.2245_188769	rq27.peg.796_194600	rq28.peg.631_200857	re30.peg.5374_165043	rq29.peg.5147_213867
235	group_11447	Serine acetyltransferase	30	30	1	312	15726				320	578	507	re01.peg.3929_3929	re02.peg.591_7772	re03.peg.6651_20877	re05.peg.2576_31039	re06.peg.4694_39721	re07.peg.4956_47169	re08.peg.1533_49918	re09.peg.5481_60363	re14.peg.1068_96897	re15.peg.1742_104393	re17.peg.65_118971	re18.peg.3357_129192	re19.peg.1017_133563	re20.peg.3393_142167	re22.peg.1560_154352	re04.peg.72_21377	re10.peg.2491_64066	re11.peg.1366_72090	re12.peg.7985_87471	re13.peg.1598_90230	re16.peg.6474_118408	re21.peg.5951_152027	rq23.peg.1112_167691	rq24.peg.3830_177168	rq25.peg.2966_182762	rq26.peg.2267_188791	rq27.peg.818_194622	rq28.peg.658_200884	re30.peg.5352_165021	rq29.peg.5124_213844
236	group_11449	transcriptional regulator TetR family	30	30	1	312	15745				275	638	545	re01.peg.3939_3939	re02.peg.603_7784	re03.peg.6641_20867	re05.peg.2587_31050	re06.peg.4684_39711	re07.peg.4945_47158	re08.peg.1544_49929	re09.peg.5491_60373	re14.peg.1058_96887	re15.peg.1722_104373	re17.peg.75_118981	re18.peg.3345_129180	re19.peg.1006_133552	re20.peg.3382_142156	re22.peg.1550_154342	re04.peg.83_21388	re10.peg.2473_64048	re11.peg.1349_72073	re12.peg.2026_81512	re13.peg.1610_90242	re16.peg.6488_118422	re21.peg.5938_152014	rq23.peg.1101_167680	rq24.peg.3842_177180	rq25.peg.2979_182775	rq26.peg.2280_188804	rq27.peg.830_194634	rq28.peg.670_200896	re30.peg.5341_165010	rq29.peg.5112_213832
237	group_11450	hypothetical protein	30	30	1	312	15748				323	527	506	re01.peg.3941_3941	re02.peg.604_7785	re03.peg.6640_20866	re05.peg.2588_31051	re06.peg.4683_39710	re07.peg.4944_47157	re08.peg.1545_49930	re09.peg.5492_60374	re14.peg.1057_96886	re15.peg.1720_104371	re17.peg.76_118982	re18.peg.3343_129178	re19.peg.1005_133551	re20.peg.3381_142155	re22.peg.1549_154341	re04.peg.84_21389	re10.peg.2471_64046	re11.peg.1347_72071	re12.peg.2024_81510	re13.peg.1611_90243	re16.peg.6489_118423	re21.peg.5937_152013	rq23.peg.1100_167679	rq24.peg.3843_177181	rq25.peg.2980_182776	rq26.peg.2281_188805	rq27.peg.831_194635	rq28.peg.672_200898	re30.peg.5340_165009	rq29.peg.5111_213831
238	group_11452	sensor kinase two-component system	30	30	1	312	15754				452	1223	1197	re01.peg.3945_3945	re02.peg.608_7789	re03.peg.6636_20862	re05.peg.2592_31055	re06.peg.4679_39706	re07.peg.4940_47153	re08.peg.1549_49934	re09.peg.5496_60378	re14.peg.1053_96882	re15.peg.1716_104367	re17.peg.80_118986	re18.peg.3339_129174	re19.peg.1001_133547	re20.peg.3377_142151	re22.peg.1545_154337	re04.peg.88_21393	re10.peg.2465_64040	re11.peg.1342_72066	re12.peg.2020_81506	re13.peg.1615_90247	re16.peg.6493_118427	re21.peg.5933_152009	rq23.peg.1096_167675	rq24.peg.3847_177185	rq25.peg.2984_182780	rq26.peg.2285_188809	rq27.peg.835_194639	rq28.peg.676_200902	re30.peg.5336_165005	rq29.peg.5107_213827
239	group_11460	Ferric enterobactin-binding periplasmic protein FepB (TC 3.A.1.14.2)	30	30	1	312	15852				842	1007	995	re01.peg.3992_3992	re02.peg.666_7847	re03.peg.6589_20815	re05.peg.2643_31106	re06.peg.4627_39654	re07.peg.4894_47107	re08.peg.1601_49986	re09.peg.5542_60424	re14.peg.1002_96831	re15.peg.1654_104305	re17.peg.127_119033	re18.peg.3287_129122	re19.peg.955_133501	re20.peg.3324_142098	re22.peg.1493_154285	re04.peg.134_21439	re10.peg.2397_63972	re11.peg.1282_72006	re12.peg.1950_81436	re13.peg.1661_90293	re16.peg.6542_118476	re21.peg.5887_151963	rq23.peg.1049_167628	rq24.peg.5325_178663	rq25.peg.3030_182826	rq26.peg.2332_188856	rq27.peg.882_194686	rq28.peg.729_200955	re30.peg.5289_164958	rq29.peg.5060_213780
240	group_11465	response regulator two-component system	30	30	1	312	15864				452	1055	713	re01.peg.4003_4003	re02.peg.678_7859	re03.peg.6579_20805	re05.peg.2654_31117	re06.peg.4617_39644	re07.peg.4884_47097	re08.peg.1611_49996	re09.peg.5552_60434	re14.peg.992_96821	re15.peg.1636_104287	re17.peg.137_119043	re18.peg.3277_129112	re19.peg.945_133491	re20.peg.3314_142088	re22.peg.1483_154275	re04.peg.145_21450	re10.peg.2380_63955	re11.peg.1268_71992	re12.peg.1933_81419	re13.peg.1672_90304	re16.peg.6553_118487	re21.peg.5875_151951	rq23.peg.1038_167617	rq24.peg.5313_178651	rq25.peg.3042_182838	rq26.peg.2344_188868	rq27.peg.893_194697	rq28.peg.742_200968	re30.peg.5277_164946	rq29.peg.5049_213769
241	group_11466	putative binding-protein-dependent integral membrane transport protein	30	30	1	312	15874				392	821	793	re01.peg.4012_4012	re02.peg.687_7868	re03.peg.6570_20796	re05.peg.2663_31126	re06.peg.4608_39635	re07.peg.4875_47088	re08.peg.1620_50005	re09.peg.5561_60443	re14.peg.983_96812	re15.peg.1624_104275	re17.peg.146_119052	re18.peg.3268_129103	re19.peg.936_133482	re20.peg.3305_142079	re22.peg.1474_154266	re04.peg.152_21457	re10.peg.2369_63944	re11.peg.1257_71981	re12.peg.1920_81406	re13.peg.1679_90311	re16.peg.6563_118497	re21.peg.5866_151942	rq23.peg.1031_167610	rq24.peg.5306_178644	rq25.peg.3049_182845	rq26.peg.2351_188875	rq27.peg.900_194704	rq28.peg.754_200980	re30.peg.5270_164939	rq29.peg.5042_213762
242	group_11470	D-serine deaminase	30	30	1	312	15916				1142	1310	1302	re01.peg.4029_4029	re02.peg.706_7887	re03.peg.6551_20777	re05.peg.2682_31145	re06.peg.4589_39616	re07.peg.4856_47069	re08.peg.1639_50024	re09.peg.5578_60460	re14.peg.964_96793	re15.peg.1599_104250	re17.peg.165_119071	re18.peg.1668_127504	re19.peg.916_133462	re20.peg.3285_142059	re22.peg.1455_154247	re04.peg.169_21474	re10.peg.7324_68899	re11.peg.1229_71953	re12.peg.7542_87028	re13.peg.1698_90330	re16.peg.2807_114741	re21.peg.5848_151924	rq23.peg.1014_167593	rq24.peg.5289_178627	rq25.peg.3066_182862	rq26.peg.2368_188892	rq27.peg.917_194721	rq28.peg.775_201001	re30.peg.5253_164922	rq29.peg.5025_213745
243	group_11471	Quaternary ammonium compound-resistance protein SugE	30	30	1	312	15925				335	392	385	re01.peg.4034_4034	re02.peg.712_7893	re03.peg.6546_20772	re05.peg.2687_31150	re06.peg.4584_39611	re07.peg.4851_47064	re08.peg.1644_50029	re09.peg.5583_60465	re14.peg.959_96788	re15.peg.1593_104244	re17.peg.170_119076	re18.peg.1663_127499	re19.peg.911_133457	re20.peg.3280_142054	re22.peg.1450_154242	re04.peg.174_21479	re10.peg.7317_68892	re11.peg.1224_71948	re12.peg.5925_85411	re13.peg.1703_90335	re16.peg.2802_114736	re21.peg.5843_151919	rq23.peg.1009_167588	rq24.peg.5284_178622	rq25.peg.3071_182867	rq26.peg.2373_188897	rq27.peg.922_194726	rq28.peg.780_201006	re30.peg.5249_164918	rq29.peg.5020_213740
244	group_11472	FIG00995588: hypothetical protein	30	30	1	312	15954				269	275	269	re01.peg.4045_4045	re02.peg.725_7906	re03.peg.6535_20761	re05.peg.2698_31161	re06.peg.4573_39600	re07.peg.4840_47053	re08.peg.1655_50040	re09.peg.5594_60476	re14.peg.948_96777	re15.peg.1567_104218	re17.peg.181_119087	re18.peg.1652_127488	re19.peg.900_133446	re20.peg.3269_142043	re22.peg.1439_154231	re04.peg.185_21490	re10.peg.901_62476	re11.peg.1204_71928	re12.peg.5897_85383	re13.peg.1714_90346	re16.peg.2791_114725	re21.peg.5832_151908	rq23.peg.998_167577	rq24.peg.5273_178611	rq25.peg.3082_182878	rq26.peg.2384_188908	rq27.peg.933_194737	rq28.peg.798_201024	re30.peg.5238_164907	rq29.peg.5008_213728
245	group_11473	ABC bifunctional lipid A exporter	30	30	1	312	15962				977	2012	1766	re01.peg.4048_4048	re02.peg.729_7910	re03.peg.6532_20758	re05.peg.2701_31164	re06.peg.4570_39597	re07.peg.4837_47050	re08.peg.1658_50043	re09.peg.5597_60479	re14.peg.945_96774	re15.peg.1562_104213	re17.peg.184_119090	re18.peg.1648_127484	re19.peg.897_133443	re20.peg.3266_142040	re22.peg.1436_154228	re04.peg.188_21493	re10.peg.906_62481	re11.peg.1199_71923	re12.peg.5894_85380	re13.peg.1717_90349	re16.peg.2788_114722	re21.peg.5829_151905	rq23.peg.995_167574	rq24.peg.5270_178608	rq25.peg.3085_182881	rq26.peg.1312_187836	rq27.peg.936_194740	rq28.peg.803_201029	re30.peg.5233_164902	rq29.peg.5005_213725
246	group_11475	3' 5'-cyclic-nucleotide phosphodiesterase	30	30	1	312	25820				905	983	910	re01.peg.4057_4057	re02.peg.6710_13891	re03.peg.5778_20004	re05.peg.5110_33573	re06.peg.3027_38054	re07.peg.5845_48058	re08.peg.3376_51761	re09.peg.2632_57514	re14.peg.3926_99755	re15.peg.5810_108461	re17.peg.4465_123371	re18.peg.5353_131188	re19.peg.3878_136424	re20.peg.6002_144776	re22.peg.4648_157440	re04.peg.6395_27700	re10.peg.5551_67126	re11.peg.3287_74011	re12.peg.4205_83691	re13.peg.2219_90851	re16.peg.1686_113620	re21.peg.988_147064	rq23.peg.4122_170701	rq24.peg.5513_178851	rq25.peg.5879_185675	rq26.peg.3789_190313	rq27.peg.6191_199995	rq28.peg.7232_207457	re30.peg.2695_162364	rq29.peg.1879_210599
247	group_11486	sensor histidine kinase	30	30	1	312	17817				1409	1472	1437	re01.peg.4106_4106	re02.peg.5889_13070	re03.peg.5835_20061	re05.peg.5075_33538	re06.peg.3062_38089	re07.peg.5805_48018	re08.peg.3427_51812	re09.peg.2671_57553	re14.peg.3870_99699	re15.peg.5726_108377	re17.peg.4510_123416	re18.peg.5398_131233	re19.peg.3820_136366	re20.peg.5969_144743	re22.peg.4602_157394	re04.peg.3933_25238	re10.peg.5601_67176	re11.peg.3335_74059	re12.peg.4257_83743	re13.peg.3058_91690	re16.peg.1651_113585	re21.peg.1599_147675	rq23.peg.4096_170675	rq24.peg.5457_178795	rq25.peg.5846_185642	rq26.peg.3828_190352	rq27.peg.6141_199945	rq28.peg.4355_204581	re30.peg.2658_162327	rq29.peg.23_208743
248	group_11489	Hydroxymethylpyrimidine ABC transporter substrate-binding component	30	30	1	312	17838				662	1028	979	re01.peg.4121_4121	re02.peg.5875_13056	re03.peg.5851_20077	re05.peg.5059_33522	re06.peg.3075_38102	re07.peg.5585_47798	re08.peg.3443_51828	re09.peg.2685_57567	re14.peg.3856_99685	re15.peg.5707_108358	re17.peg.4524_123430	re18.peg.5412_131247	re19.peg.3806_136352	re20.peg.5955_144729	re22.peg.4588_157380	re04.peg.3917_25222	re10.peg.4069_65644	re11.peg.7099_77823	re12.peg.6840_86326	re13.peg.3072_91704	re16.peg.1635_113569	re21.peg.1613_147689	rq23.peg.4082_170661	rq24.peg.5443_178781	rq25.peg.5833_185629	rq26.peg.3842_190366	rq27.peg.6127_199931	rq28.peg.4370_204596	re30.peg.2644_162313	rq29.peg.38_208758
249	group_11491	FIG01000165: hypothetical protein	30	30	1	312	17840				1319	1568	1547	re01.peg.4123_4123	re02.peg.5873_13054	re03.peg.5853_20079	re05.peg.5057_33520	re06.peg.3077_38104	re07.peg.5583_47796	re08.peg.3445_51830	re09.peg.2687_57569	re14.peg.3854_99683	re15.peg.5705_108356	re17.peg.4526_123432	re18.peg.5415_131250	re19.peg.3804_136350	re20.peg.5953_144727	re22.peg.4586_157378	re04.peg.3915_25220	re10.peg.4071_65646	re11.peg.7101_77825	re12.peg.6842_86328	re13.peg.3074_91706	re16.peg.1633_113567	re21.peg.1615_147691	rq23.peg.4080_170659	rq24.peg.5441_178779	rq25.peg.5831_185627	rq26.peg.3844_190368	rq27.peg.6125_199929	rq28.peg.4372_204598	re30.peg.2642_162311	rq29.peg.40_208760
250	group_11497	FIG00997211: hypothetical protein	30	30	1	312	17955				446	773	762	re01.peg.4166_4166	re02.peg.5836_13017	re03.peg.5887_20113	re05.peg.5025_33488	re06.peg.3108_38135	re07.peg.5552_47765	re08.peg.3475_51860	re09.peg.2718_57600	re14.peg.3823_99652	re15.peg.5664_108315	re17.peg.5367_124273	re18.peg.5763_131598	re19.peg.3769_136315	re20.peg.5921_144695	re22.peg.4543_157335	re04.peg.3875_25180	re10.peg.4111_65686	re11.peg.3900_74624	re12.peg.4652_84138	re13.peg.2879_91511	re16.peg.148_112082	re21.peg.1647_147723	rq23.peg.4047_170626	rq24.peg.5409_178747	rq25.peg.5799_185595	rq26.peg.5460_191984	rq27.peg.6112_199916	rq28.peg.4408_204634	re30.peg.2611_162280	rq29.peg.70_208790
251	group_11498	FIG00996788: hypothetical protein	30	30	1	312	17996				1523	1790	1755	re01.peg.4190_4190	re02.peg.5812_12993	re03.peg.5910_20136	re05.peg.5003_33466	re06.peg.3130_38157	re07.peg.5530_47743	re08.peg.3498_51883	re09.peg.2740_57622	re14.peg.3801_99630	re15.peg.5634_108285	re17.peg.5390_124296	re18.peg.5741_131576	re19.peg.3747_136293	re20.peg.5899_144673	re22.peg.4521_157313	re04.peg.3850_25155	re10.peg.4147_65722	re11.peg.3927_74651	re12.peg.4684_84170	re13.peg.2856_91488	re16.peg.270_112204	re21.peg.1670_147746	rq23.peg.4024_170603	rq24.peg.5386_178724	rq25.peg.5774_185570	rq26.peg.5437_191961	rq27.peg.6088_199892	rq28.peg.4434_204660	re30.peg.2588_162257	rq29.peg.93_208813
252	group_11507	Xylulose-5-phosphate phosphoketolase @ Fructose-6-phosphate phosphoketolase	30	30	1	312	18022				1640	2501	2324	re01.peg.4209_4209	re02.peg.5794_12975	re03.peg.5926_20152	re05.peg.4986_33449	re06.peg.3146_38173	re07.peg.5514_47727	re08.peg.3518_51903	re09.peg.2756_57638	re14.peg.3785_99614	re15.peg.5607_108258	re17.peg.5406_124312	re18.peg.5724_131559	re19.peg.3731_136277	re20.peg.5883_144657	re22.peg.4505_157297	re04.peg.3834_25139	re10.peg.4172_65747	re11.peg.3948_74672	re12.peg.4709_84195	re13.peg.2839_91471	re16.peg.286_112220	re21.peg.1686_147762	rq23.peg.4008_170587	rq24.peg.5370_178708	rq25.peg.5758_185554	rq26.peg.5421_191945	rq27.peg.6072_199876	rq28.peg.4456_204682	re30.peg.2572_162241	rq29.peg.109_208829
253	group_11515	Maltose/maltodextrin ABC transporter substrate binding periplasmic protein MalE	30	30	1	312	31273				194	1289	1200	re01.peg.4243_4243	re02.peg.1854_9035	re03.peg.3444_17670	re05.peg.6100_34563	re06.peg.3927_38954	re07.peg.8_42221	re08.peg.4614_52999	re09.peg.724_55606	re14.peg.5909_101738	re15.peg.8569_111220	re17.peg.6027_124933	re18.peg.6037_131872	re19.peg.5818_138364	re20.peg.2186_140960	re22.peg.6539_159331	re04.peg.5934_27239	re10.peg.4874_66449	re11.peg.8214_78938	re12.peg.3212_82698	re13.peg.2789_91421	re16.peg.3991_115925	re21.peg.6141_152217	rq23.peg.6243_172822	rq24.peg.3885_177223	rq25.peg.4480_184276	rq26.peg.6141_192665	rq27.peg.2034_195838	rq28.peg.7329_207554	re30.peg.4847_164516	rq29.peg.5629_214349
254	group_11523	probable carbohydrate diacid regulator	30	30	1	312	31302				407	1643	1572	re01.peg.4258_4258	re02.peg.1870_9051	re03.peg.3459_17685	re05.peg.6082_34545	re06.peg.3942_38969	re07.peg.22_42235	re08.peg.4629_53014	re09.peg.739_55621	re14.peg.5894_101723	re15.peg.8548_111199	re17.peg.6012_124918	re18.peg.6052_131887	re19.peg.5803_138349	re20.peg.2171_140945	re22.peg.6524_159316	re04.peg.5919_27224	re10.peg.4856_66431	re11.peg.3791_74515	re12.peg.3235_82721	re13.peg.2804_91436	re16.peg.3976_115910	re21.peg.6159_152235	rq23.peg.6228_172807	rq24.peg.3900_177238	rq25.peg.4495_184291	rq26.peg.6156_192680	rq27.peg.2048_195852	rq28.peg.7345_207570	re30.peg.4832_164501	rq29.peg.5614_214334
255	group_11525	(2Fe-2S)-binding domain protein	30	30	1	312	30491				170	746	622	re01.peg.4271_4271	re02.peg.4786_11967	re03.peg.5236_19462	re05.peg.6272_34735	re06.peg.2097_37125	re07.peg.34_42247	re08.peg.4641_53026	re09.peg.751_55633	re14.peg.5882_101711	re15.peg.8527_111178	re17.peg.6337_125243	re18.peg.6092_131927	re19.peg.5791_138337	re20.peg.2159_140933	re22.peg.6512_159304	re04.peg.5532_26837	re10.peg.6575_68150	re11.peg.3773_74497	re12.peg.5509_84995	re13.peg.5632_94264	re16.peg.1708_113642	re21.peg.6171_152247	rq23.peg.6216_172795	rq24.peg.3912_177250	rq25.peg.4507_184303	rq26.peg.322_186846	rq27.peg.2060_195864	rq28.peg.2706_202932	re30.peg.4820_164489	rq29.peg.5873_214593
256	group_11528	Alkanesulfonate monooxygenase	30	30	1	312	30454				680	1211	1137	re01.peg.4288_4288	re02.peg.4805_11986	re03.peg.5254_19480	re05.peg.6254_34717	re06.peg.2079_37107	re07.peg.52_42265	re08.peg.4659_53044	re09.peg.769_55651	re14.peg.5864_101693	re15.peg.8496_111147	re17.peg.6320_125226	re18.peg.6109_131944	re19.peg.5773_138319	re20.peg.2141_140915	re22.peg.6493_159285	re04.peg.5514_26819	re10.peg.6549_68124	re11.peg.3751_74475	re12.peg.5482_84968	re13.peg.5643_94275	re16.peg.1720_113654	re21.peg.6188_152264	rq23.peg.6198_172777	rq24.peg.3930_177268	rq25.peg.4525_184321	rq26.peg.340_186864	rq27.peg.2078_195882	rq28.peg.2806_203032	re30.peg.4802_164471	rq29.peg.5891_214611
257	group_11530	Alkanesulfonates ABC transporter ATP-binding protein / Sulfonate ABC transporter ATP-binding subunit SsuB	30	30	1	312	30450				842	866	859	re01.peg.4291_4291	re02.peg.4808_11989	re03.peg.5257_19483	re05.peg.6249_34712	re06.peg.2076_37104	re07.peg.55_42268	re08.peg.4662_53047	re09.peg.772_55654	re14.peg.5861_101690	re15.peg.8492_111143	re17.peg.6317_125223	re18.peg.6112_131947	re19.peg.5770_138316	re20.peg.2138_140912	re22.peg.6490_159282	re04.peg.5511_26816	re10.peg.6545_68120	re11.peg.3747_74471	re12.peg.5479_84965	re13.peg.5646_94278	re16.peg.1723_113657	re21.peg.6191_152267	rq23.peg.6195_172774	rq24.peg.3933_177271	rq25.peg.4528_184324	rq26.peg.343_186867	rq27.peg.2081_195885	rq28.peg.2809_203035	re30.peg.4799_164468	rq29.peg.5894_214614
258	group_11531	Multimodular transpeptidase-transglycosylase	30	30	1	312	30403				950	1577	1541	re01.peg.4309_4309	re02.peg.4826_12007	re03.peg.85_14311	re05.peg.3_28466	re06.peg.2048_37076	re07.peg.73_42286	re08.peg.4690_53075	re09.peg.791_55673	re14.peg.5843_101672	re15.peg.8466_111117	re17.peg.5114_124020	re18.peg.3487_129322	re19.peg.5743_138289	re20.peg.2120_140894	re22.peg.6471_159263	re04.peg.5482_26787	re10.peg.3316_64891	re11.peg.3_70727	re12.peg.1508_80994	re13.peg.6388_95020	re16.peg.1742_113676	re21.peg.1559_147635	rq23.peg.6177_172756	rq24.peg.3952_177290	rq25.peg.4547_184343	rq26.peg.363_186887	rq27.peg.2100_195904	rq28.peg.2834_203060	re30.peg.4779_164448	rq29.peg.5914_214634
259	group_11539	ThiJ/PfpI family protein	30	30	1	312	30187				647	674	673	re01.peg.4394_4394	re02.peg.4902_12083	re03.peg.158_14384	re05.peg.86_28549	re06.peg.1291_36319	re07.peg.153_42366	re08.peg.5893_54278	re09.peg.909_55791	re14.peg.5733_101562	re15.peg.8344_110995	re17.peg.5566_124472	re18.peg.3563_129398	re19.peg.5648_138194	re20.peg.2024_140798	re22.peg.6395_159187	re04.peg.2141_23446	re10.peg.2209_63784	re11.peg.132_70856	re12.peg.14_79500	re13.peg.6279_94911	re16.peg.1835_113769	re21.peg.3153_149229	rq23.peg.6089_172668	rq24.peg.4111_177449	rq25.peg.4633_184429	rq26.peg.5_186529	rq27.peg.2202_196006	rq28.peg.4150_204376	re30.peg.4655_164324	rq29.peg.6037_214757
260	group_11541	Acetaldehyde dehydrogenase acetylating in gene cluster for degradation of phenols cresols catechol	30	30	1	312	30149				290	944	910	re01.peg.4404_4404	re02.peg.4910_12091	re03.peg.168_14394	re05.peg.95_28558	re06.peg.1283_36311	re07.peg.161_42374	re08.peg.6256_54641	re09.peg.917_55799	re14.peg.5712_101541	re15.peg.8313_110964	re17.peg.5552_124458	re18.peg.3571_129406	re19.peg.5628_138174	re20.peg.2016_140790	re22.peg.6386_159178	re04.peg.2152_23457	re10.peg.2221_63796	re11.peg.144_70868	re12.peg.24_79510	re13.peg.6268_94900	re16.peg.1846_113780	re21.peg.3163_149239	rq23.peg.6075_172654	rq24.peg.4124_177462	rq25.peg.4645_184441	rq26.peg.18_186542	rq27.peg.2214_196018	rq28.peg.4137_204363	re30.peg.4643_164312	rq29.peg.6048_214768
261	group_11545	Sialic acid utilization regulator RpiR family	30	30	1	312	9107				638	875	866	re01.peg.4463_4463	re02.peg.448_7629	re03.peg.2805_17031	re05.peg.5589_34052	re06.peg.2175_37203	re07.peg.2107_44320	re08.peg.1404_49789	re09.peg.5352_60234	re14.peg.1200_97029	re15.peg.1921_104572	re17.peg.2720_121626	re18.peg.4714_130549	re19.peg.1150_133696	re20.peg.3872_142646	re22.peg.1691_154483	re04.peg.5591_26896	re10.peg.1315_62890	re11.peg.808_71532	re12.peg.2054_81540	re13.peg.538_89170	re16.peg.6310_118244	re21.peg.1758_147834	rq23.peg.1255_167834	rq24.peg.358_173696	rq25.peg.5722_185518	rq26.peg.6934_193458	rq27.peg.674_194478	rq28.peg.6776_207001	re30.peg.5492_165161	rq29.peg.233_208953
262	group_11547	FIG01124534: hypothetical protein	30	30	1	312	9078				347	434	390	re01.peg.4475_4475	re02.peg.433_7614	re03.peg.2791_17017	re05.peg.5575_34038	re06.peg.2188_37216	re07.peg.2119_44332	re08.peg.1390_49775	re09.peg.5339_60221	re14.peg.1214_97043	re15.peg.1939_104590	re17.peg.2735_121641	re18.peg.4701_130536	re19.peg.1163_133709	re20.peg.3859_142633	re22.peg.1705_154497	re04.peg.5579_26884	re10.peg.1296_62871	re11.peg.823_71547	re12.peg.2075_81561	re13.peg.550_89182	re16.peg.6298_118232	re21.peg.1746_147822	rq23.peg.1268_167847	rq24.peg.371_173709	rq25.peg.5710_185506	rq26.peg.6922_193446	rq27.peg.662_194466	rq28.peg.6760_206985	re30.peg.5504_165173	rq29.peg.245_208965
263	group_11552	probable regulatory protein	30	30	1	312	8760				602	797	677	re01.peg.4600_4600	re02.peg.375_7556	re03.peg.3653_17879	re05.peg.5509_33972	re06.peg.2279_37307	re07.peg.2183_44396	re08.peg.3769_52154	re09.peg.5274_60156	re14.peg.1289_97118	re15.peg.2031_104682	re17.peg.2806_121712	re18.peg.4648_130483	re19.peg.1227_133773	re20.peg.3799_142573	re22.peg.1758_154550	re04.peg.4055_25360	re10.peg.1207_62782	re11.peg.903_71627	re12.peg.2166_81652	re13.peg.620_89252	re16.peg.6225_118159	re21.peg.3894_149970	rq23.peg.1340_167919	rq24.peg.432_173770	rq25.peg.5620_185416	rq26.peg.7001_193525	rq27.peg.600_194404	rq28.peg.6840_207065	re30.peg.5564_165233	rq29.peg.317_209037
264	group_11555	FIG01000940: hypothetical protein	30	30	1	312	8724				1121	1148	1145	re01.peg.4628_4628	re02.peg.347_7528	re03.peg.3627_17853	re05.peg.5482_33945	re06.peg.2307_37335	re07.peg.2208_44421	re08.peg.3796_52181	re09.peg.5247_60129	re14.peg.1316_97145	re15.peg.2060_104711	re17.peg.2833_121739	re18.peg.4622_130457	re19.peg.1254_133800	re20.peg.3772_142546	re22.peg.1784_154576	re04.peg.4029_25334	re10.peg.1176_62751	re11.peg.935_71659	re12.peg.3977_83463	re13.peg.646_89278	re16.peg.6198_118132	re21.peg.3868_149944	rq23.peg.1368_167947	rq24.peg.460_173798	rq25.peg.5593_185389	rq26.peg.3548_190072	rq27.peg.573_194377	rq28.peg.6811_207036	re30.peg.5591_165260	rq29.peg.345_209065
265	group_11557	membrane efflux protein	30	30	1	312	29363				605	1220	1197	re01.peg.4664_4664	re02.peg.2927_10108	re03.peg.2607_16833	re05.peg.443_28906	re06.peg.1703_36731	re07.peg.507_42720	re08.peg.338_48723	re09.peg.1263_56145	re14.peg.5366_101195	re15.peg.7775_110426	re17.peg.3856_122762	re18.peg.218_126054	re19.peg.5283_137829	re20.peg.1676_140450	re22.peg.6047_158839	re04.peg.2504_23809	re10.peg.4362_65937	re11.peg.1574_72298	re12.peg.4798_84284	re13.peg.5656_94288	re16.peg.1224_113158	re21.peg.963_147039	rq23.peg.5654_172233	rq24.peg.876_174214	rq25.peg.1193_180989	rq26.peg.1354_187878	rq27.peg.2585_196389	rq28.peg.6410_206635	re30.peg.4169_163838	rq29.peg.2179_210899
266	group_11563	Rrf2 family transcriptional regulator	30	30	1	312	29028				362	464	427	re01.peg.4719_4719	re02.peg.2866_10047	re03.peg.2554_16780	re05.peg.498_28961	re06.peg.1651_36679	re07.peg.562_42775	re08.peg.393_48778	re09.peg.1317_56199	re14.peg.5325_101154	re15.peg.7683_110334	re17.peg.3917_122823	re18.peg.270_126106	re19.peg.5227_137773	re20.peg.1623_140397	re22.peg.6004_158796	re04.peg.2563_23868	re10.peg.4289_65864	re11.peg.1642_72366	re12.peg.1649_81135	re13.peg.5714_94346	re16.peg.1169_113103	re21.peg.895_146971	rq23.peg.5598_172177	rq24.peg.934_174272	rq25.peg.1137_180933	rq26.peg.1411_187935	rq27.peg.2645_196449	rq28.peg.7134_207359	re30.peg.4111_163780	rq29.peg.2124_210844
267	group_11564	Coenzyme F420-dependent N5 N10-methylene tetrahydromethanopterin reductase and related flavin-dependent oxidoreductases	30	30	1	312	29026				785	896	850	re01.peg.4721_4721	re02.peg.2864_10045	re03.peg.2552_16778	re05.peg.500_28963	re06.peg.1649_36677	re07.peg.564_42777	re08.peg.395_48780	re09.peg.1319_56201	re14.peg.5323_101152	re15.peg.7680_110331	re17.peg.3919_122825	re18.peg.272_126108	re19.peg.5225_137771	re20.peg.1621_140395	re22.peg.6002_158794	re04.peg.2565_23870	re10.peg.4287_65862	re11.peg.1644_72368	re12.peg.1651_81137	re13.peg.5716_94348	re16.peg.1167_113101	re21.peg.893_146969	rq23.peg.5596_172175	rq24.peg.936_174274	rq25.peg.1135_180931	rq26.peg.1413_187937	rq27.peg.2647_196451	rq28.peg.7132_207357	re30.peg.4109_163778	rq29.peg.2122_210842
268	group_11565	FIG01001012: hypothetical protein	30	30	1	312	28997				566	836	821	re01.peg.4741_4741	re02.peg.2843_10024	re03.peg.2532_16758	re05.peg.520_28983	re06.peg.1629_36657	re07.peg.584_42797	re08.peg.415_48800	re09.peg.1339_56221	re14.peg.5303_101132	re15.peg.7654_110305	re17.peg.3939_122845	re18.peg.294_126130	re19.peg.5205_137751	re20.peg.1601_140375	re22.peg.5982_158774	re04.peg.2585_23890	re10.peg.4264_65839	re11.peg.1667_72391	re12.peg.1674_81160	re13.peg.5736_94368	re16.peg.1146_113080	re21.peg.873_146949	rq23.peg.5576_172155	rq24.peg.956_174294	rq25.peg.1115_180911	rq26.peg.1433_187957	rq27.peg.2667_196471	rq28.peg.7109_207334	re30.peg.4089_163758	rq29.peg.2102_210822
269	group_11566	hypothetical protein	30	30	1	312	28943				503	536	511	re01.peg.4770_4770	re02.peg.2812_9993	re03.peg.2502_16728	re05.peg.555_29018	re06.peg.1593_36621	re07.peg.614_42827	re08.peg.445_48830	re09.peg.1369_56251	re14.peg.5273_101102	re15.peg.7617_110268	re17.peg.3969_122875	re18.peg.329_126165	re19.peg.5175_137721	re20.peg.1567_140341	re22.peg.5952_158744	re04.peg.2613_23918	re10.peg.366_61941	re11.peg.1705_72429	re12.peg.1709_81195	re13.peg.5775_94407	re16.peg.1117_113051	re21.peg.838_146914	rq23.peg.5536_172115	rq24.peg.986_174324	rq25.peg.1085_180881	rq26.peg.1463_187987	rq27.peg.2697_196501	rq28.peg.6117_206342	re30.peg.4059_163728	rq29.peg.2254_210974
270	group_11571	Potassium efflux system kefA / Small-conductance mechanosensitive channel	30	30	1	312	28737				542	857	839	re01.peg.4801_4801	re02.peg.2774_9955	re03.peg.2464_16690	re05.peg.594_29057	re06.peg.1555_36583	re07.peg.651_42864	re08.peg.483_48868	re09.peg.1398_56280	re14.peg.5235_101064	re15.peg.7567_110218	re17.peg.4010_122916	re18.peg.368_126204	re19.peg.5137_137683	re20.peg.1529_140303	re22.peg.5913_158705	re04.peg.2652_23957	re10.peg.426_62001	re11.peg.7396_78120	re12.peg.6893_86379	re13.peg.5826_94458	re16.peg.1078_113012	re21.peg.799_146875	rq23.peg.5498_172077	rq24.peg.1039_174377	rq25.peg.1046_180842	rq26.peg.1498_188022	rq27.peg.2825_196629	rq28.peg.6162_206387	re30.peg.4025_163694	rq29.peg.2293_211013
271	group_11576	Bll3817 protein	30	30	1	312	28689				548	647	572	re01.peg.4826_4826	re02.peg.2752_9933	re03.peg.2443_16669	re05.peg.615_29078	re06.peg.1535_36563	re07.peg.671_42884	re08.peg.505_48890	re09.peg.1418_56300	re14.peg.5215_101044	re15.peg.7545_110196	re17.peg.4030_122936	re18.peg.387_126223	re19.peg.5117_137663	re20.peg.1508_140282	re22.peg.5893_158685	re04.peg.2672_23977	re10.peg.457_62032	re11.peg.7366_78090	re12.peg.6477_85963	re13.peg.5852_94484	re16.peg.1056_112990	re21.peg.774_146850	rq23.peg.5476_172055	rq24.peg.1059_174397	rq25.peg.1026_180822	rq26.peg.1518_188042	rq27.peg.2845_196649	rq28.peg.6185_206410	re30.peg.4005_163674	rq29.peg.2313_211033
272	group_11580	Ribokinase	30	30	1	312	28675				824	899	896	re01.peg.4832_4832	re02.peg.2745_9926	re03.peg.2437_16663	re05.peg.621_29084	re06.peg.1529_36557	re07.peg.677_42890	re08.peg.511_48896	re09.peg.1424_56306	re14.peg.5209_101038	re15.peg.7536_110187	re17.peg.4036_122942	re18.peg.393_126229	re19.peg.5111_137657	re20.peg.1502_140276	re22.peg.5887_158679	re04.peg.2678_23983	re10.peg.467_62042	re11.peg.7376_78100	re12.peg.6468_85954	re13.peg.5858_94490	re16.peg.1050_112984	re21.peg.768_146844	rq23.peg.5470_172049	rq24.peg.1065_174403	rq25.peg.1020_180816	rq26.peg.1524_188048	rq27.peg.2851_196655	rq28.peg.6195_206420	re30.peg.3999_163668	rq29.peg.2319_211039
273	group_11584	FIG074102: hypothetical protein	30	30	1	312	28668				389	752	737	re01.peg.4837_4837	re02.peg.2740_9921	re03.peg.2432_16658	re05.peg.626_29089	re06.peg.1524_36552	re07.peg.682_42895	re08.peg.516_48901	re09.peg.1429_56311	re14.peg.5204_101033	re15.peg.7528_110179	re17.peg.4041_122947	re18.peg.398_126234	re19.peg.5106_137652	re20.peg.1497_140271	re22.peg.5882_158674	re04.peg.2683_23988	re10.peg.472_62047	re11.peg.7381_78105	re12.peg.6461_85947	re13.peg.5863_94495	re16.peg.1045_112979	re21.peg.763_146839	rq23.peg.5465_172044	rq24.peg.1070_174408	rq25.peg.1015_180811	rq26.peg.1529_188053	rq27.peg.2856_196660	rq28.peg.7774_207999	re30.peg.3994_163663	rq29.peg.2324_211044
274	group_11590	Serine/threonine kinase	30	30	1	312	26463				1067	1307	1299	re01.peg.4858_4858	re02.peg.5373_12554	re03.peg.2171_16397	re05.peg.1609_30072	re06.peg.2512_37539	re07.peg.3046_45259	re08.peg.5819_54204	re09.peg.2362_57244	re14.peg.4195_100024	re15.peg.6186_108837	re17.peg.3500_122406	re18.peg.2337_128173	re19.peg.4140_136686	re20.peg.541_139315	re22.peg.4917_157709	re04.peg.2879_24184	re10.peg.6316_67891	re11.peg.4993_75717	re12.peg.5284_84770	re13.peg.3201_91833	re16.peg.2307_114241	re21.peg.6436_152512	rq23.peg.4481_171060	rq24.peg.3626_176964	rq25.peg.125_179921	rq26.peg.2105_188629	rq27.peg.5785_199589	rq28.peg.1468_201694	re30.peg.3075_162744	rq29.peg.1701_210421
275	group_11592	Glutamine amidotransferases class-II	30	30	1	312	26462				206	746	728	re01.peg.4859_4859	re02.peg.5371_12552	re03.peg.2172_16398	re05.peg.1610_30073	re06.peg.2511_37538	re07.peg.3045_45258	re08.peg.5818_54203	re09.peg.2363_57245	re14.peg.4194_100023	re15.peg.6185_108836	re17.peg.3499_122405	re18.peg.2338_128174	re19.peg.4139_136685	re20.peg.540_139314	re22.peg.4916_157708	re04.peg.2878_24183	re10.peg.6317_67892	re11.peg.4992_75716	re12.peg.5286_84772	re13.peg.3202_91834	re16.peg.2306_114240	re21.peg.6435_152511	rq23.peg.4480_171059	rq24.peg.3625_176963	rq25.peg.124_179920	rq26.peg.2106_188630	rq27.peg.5786_199590	rq28.peg.1467_201693	re30.peg.3074_162743	rq29.peg.1700_210420
276	group_11605	3-oxoacyl-[acyl-carrier protein] reductase	30	30	1	312	26260				278	851	831	re01.peg.4911_4910	re02.peg.3936_11117	re03.peg.2219_16445	re05.peg.1665_30128	re06.peg.2458_37486	re07.peg.2989_45202	re08.peg.5076_53461	re09.peg.2415_57297	re14.peg.4146_99975	re15.peg.6115_108766	re17.peg.3446_122352	re18.peg.2396_128232	re19.peg.4094_136640	re20.peg.485_139259	re22.peg.4869_157661	re04.peg.2823_24128	re10.peg.6448_68023	re11.peg.6912_77636	re12.peg.6527_86013	re13.peg.3257_91889	re16.peg.2258_114192	re21.peg.3513_149589	rq23.peg.4343_170922	rq24.peg.3579_176917	rq25.peg.5292_185088	rq26.peg.6775_193299	rq27.peg.5834_199638	rq28.peg.1403_201629	re30.peg.3020_162689	rq29.peg.1647_210367
277	group_11607	Mycothiol S-conjugate amidase Mca	30	30	1	312	26234				317	980	899	re01.peg.4928_4927	re02.peg.3955_11136	re03.peg.2236_16462	re05.peg.1682_30145	re06.peg.3859_38886	re07.peg.2972_45185	re08.peg.5059_53444	re09.peg.2432_57314	re14.peg.4129_99958	re15.peg.6090_108741	re17.peg.3429_122335	re18.peg.2413_128249	re19.peg.4077_136623	re20.peg.468_139242	re22.peg.4852_157644	re04.peg.2806_24111	re10.peg.6467_68042	re11.peg.6931_77655	re12.peg.6548_86034	re13.peg.3274_91906	re16.peg.2241_114175	re21.peg.3530_149606	rq23.peg.4326_170905	rq24.peg.3562_176900	rq25.peg.5309_185105	rq26.peg.6792_193316	rq27.peg.5852_199656	rq28.peg.1384_201610	re30.peg.3002_162671	rq29.peg.221_208941
278	group_11609	hypothetical protein	30	30	1	312	26211				395	425	396	re01.peg.4941_4940	re02.peg.3969_11150	re03.peg.2248_16474	re05.peg.1694_30157	re06.peg.3847_38874	re07.peg.2960_45173	re08.peg.5047_53432	re09.peg.2444_57326	re14.peg.4117_99946	re15.peg.6072_108723	re17.peg.3417_122323	re18.peg.2425_128261	re19.peg.4065_136611	re20.peg.456_139230	re22.peg.4840_157632	re04.peg.2794_24099	re10.peg.7593_69168	re11.peg.7163_77887	re12.peg.8005_87491	re13.peg.3287_91919	re16.peg.2229_114163	re21.peg.5414_151490	rq23.peg.4314_170893	rq24.peg.3550_176888	rq25.peg.5321_185117	rq26.peg.6804_193328	rq27.peg.5864_199668	rq28.peg.1371_201597	re30.peg.2990_162659	rq29.peg.209_208929
279	group_1161	hypothetical protein	30	30	1	312	5963				431	965	850	re01.peg.1431_1431	re02.peg.1426_8607	re03.peg.992_15218	re05.peg.3406_31869	re06.peg.3789_38816	re07.peg.3862_46075	re08.peg.5145_53530	re09.peg.365_55247	re14.peg.253_96082	re15.peg.392_103043	re17.peg.2556_121462	re18.peg.2601_128437	re19.peg.249_132795	re20.peg.2551_141325	re22.peg.677_153469	re04.peg.5441_26746	re10.peg.3280_64855	re11.peg.1986_72710	re12.peg.2207_81693	re13.peg.6982_95614	re16.peg.1431_113365	re21.peg.4135_150211	rq23.peg.257_166836	rq24.peg.3144_176482	rq25.peg.1697_181493	rq26.peg.692_187216	rq27.peg.1644_195448	rq28.peg.1757_201983	re30.peg.294_159963	rq29.peg.3502_212222
280	group_11612	hypothetical protein	30	30	1	312	26182				149	524	399	re01.peg.4958_4957	re02.peg.3990_11171	re03.peg.2265_16491	re05.peg.1713_30176	re06.peg.2155_37183	re07.peg.2941_45154	re08.peg.5028_53413	re09.peg.2462_57344	re14.peg.4099_99928	re15.peg.6050_108701	re17.peg.3399_122305	re18.peg.2443_128279	re19.peg.4048_136594	re20.peg.438_139212	re22.peg.4821_157613	re04.peg.2777_24082	re10.peg.5834_67409	re11.peg.4585_75309	re12.peg.7395_86881	re13.peg.3304_91936	re16.peg.2212_114146	re21.peg.5397_151473	rq23.peg.4297_170876	rq24.peg.3533_176871	rq25.peg.5339_185135	rq26.peg.6821_193345	rq27.peg.5881_199685	rq28.peg.1350_201576	re30.peg.2972_162641	rq29.peg.192_208912
281	group_11614	FIG00997976: hypothetical protein	30	30	1	312	26093				392	632	504	re01.peg.4995_4994	re02.peg.4023_11204	re03.peg.2297_16523	re05.peg.1744_30207	re06.peg.2125_37153	re07.peg.2906_45119	re08.peg.4997_53382	re09.peg.2492_57374	re14.peg.4066_99895	re15.peg.6003_108654	re17.peg.3370_122276	re18.peg.2474_128310	re19.peg.4017_136563	re20.peg.394_139168	re22.peg.4789_157581	re04.peg.2746_24051	re10.peg.5796_67371	re11.peg.4619_75343	re12.peg.5943_85429	re13.peg.3333_91965	re16.peg.2181_114115	re21.peg.5368_151444	rq23.peg.4266_170845	rq24.peg.5878_179216	rq25.peg.5369_185165	rq26.peg.7031_193555	rq27.peg.5910_199714	rq28.peg.1309_201535	re30.peg.2939_162608	rq29.peg.161_208881
282	group_11615	Pterin-4-alpha-carbinolamine dehydratase	30	30	1	312	26083				293	326	299	re01.peg.5001_5000	re02.peg.4028_11209	re03.peg.2304_16530	re05.peg.1751_30214	re06.peg.2119_37147	re07.peg.2901_45114	re08.peg.4991_53376	re09.peg.2497_57379	re14.peg.4060_99889	re15.peg.5997_108648	re17.peg.3365_122271	re18.peg.2479_128315	re19.peg.4012_136558	re20.peg.389_139163	re22.peg.4783_157575	re04.peg.2741_24046	re10.peg.5790_67365	re11.peg.4625_75349	re12.peg.5950_85436	re13.peg.3338_91970	re16.peg.2176_114110	re21.peg.5363_151439	rq23.peg.4261_170840	rq24.peg.5883_179221	rq25.peg.5374_185170	rq26.peg.7036_193560	rq27.peg.5916_199720	rq28.peg.7574_207799	re30.peg.2934_162603	rq29.peg.156_208876
283	group_11619	possible hydrolase	30	30	1	312	29950				623	680	663	re01.peg.5049_5048	re02.peg.3214_10395	re03.peg.6201_20427	re05.peg.169_28632	re06.peg.1212_36240	re07.peg.240_42453	re08.peg.60_48445	re09.peg.996_55878	re14.peg.5638_101467	re15.peg.8222_110873	re17.peg.3308_122214	re18.peg.3647_129482	re19.peg.5557_138103	re20.peg.1944_140718	re22.peg.6314_159106	re04.peg.2232_23537	re10.peg.2334_63909	re11.peg.254_70978	re12.peg.138_79624	re13.peg.6189_94821	re16.peg.5099_117033	re21.peg.3245_149321	rq23.peg.5993_172572	rq24.peg.593_173931	rq25.peg.1468_181264	rq26.peg.4929_191453	rq27.peg.2307_196111	rq28.peg.4034_204260	re30.peg.4557_164226	rq29.peg.2515_211235
284	group_11620	3-oxoacyl-[acyl-carrier protein] reductase	30	30	1	312	29941				293	788	757	re01.peg.5052_5051	re02.peg.3210_10391	re03.peg.6198_20424	re05.peg.172_28635	re06.peg.1209_36237	re07.peg.243_42456	re08.peg.63_48448	re09.peg.999_55881	re14.peg.5635_101464	re15.peg.8219_110870	re17.peg.3305_122211	re18.peg.3650_129485	re19.peg.5554_138100	re20.peg.1941_140715	re22.peg.6311_159103	re04.peg.2235_23540	re10.peg.2336_63911	re11.peg.257_70981	re12.peg.141_79627	re13.peg.6186_94818	re16.peg.5093_117027	re21.peg.3248_149324	rq23.peg.5990_172569	rq24.peg.596_173934	rq25.peg.1465_181261	rq26.peg.4926_191450	rq27.peg.2310_196114	rq28.peg.6426_206651	re30.peg.4554_164223	rq29.peg.2518_211238
285	group_11623	hypothetical protein	30	30	1	312	29893				158	458	439	re01.peg.5072_5071	re02.peg.3187_10368	re03.peg.6172_20398	re05.peg.196_28659	re06.peg.1189_36217	re07.peg.263_42476	re08.peg.86_48471	re09.peg.1019_55901	re14.peg.5612_101441	re15.peg.8183_110834	re17.peg.3281_122187	re18.peg.3672_129507	re19.peg.5535_138081	re20.peg.1922_140696	re22.peg.6291_159083	re04.peg.2260_23565	re10.peg.6649_68224	re11.peg.1179_71903	re12.peg.192_79678	re13.peg.6161_94793	re16.peg.5069_117003	re21.peg.3272_149348	rq23.peg.5965_172544	rq24.peg.622_173960	rq25.peg.1440_181236	rq26.peg.4903_191427	rq27.peg.2335_196139	rq28.peg.6458_206683	re30.peg.4530_164199	rq29.peg.2543_211263
286	group_11625	Transcriptional regulator TetR family	30	30	1	312	29889				419	566	555	re01.peg.5074_5073	re02.peg.3185_10366	re03.peg.6170_20396	re05.peg.198_28661	re06.peg.1187_36215	re07.peg.265_42478	re08.peg.88_48473	re09.peg.1021_55903	re14.peg.5610_101439	re15.peg.8181_110832	re17.peg.3279_122185	re18.peg.3674_129509	re19.peg.5533_138079	re20.peg.1920_140694	re22.peg.6289_159081	re04.peg.2262_23567	re10.peg.6651_68226	re11.peg.1177_71901	re12.peg.195_79681	re13.peg.6159_94791	re16.peg.5067_117001	re21.peg.3274_149350	rq23.peg.5963_172542	rq24.peg.624_173962	rq25.peg.1438_181234	rq26.peg.4901_191425	rq27.peg.2337_196141	rq28.peg.6460_206685	re30.peg.4528_164197	rq29.peg.2545_211265
287	group_11626	FIG01002058: hypothetical protein	30	30	1	312	29853				500	659	644	re01.peg.5093_5092	re02.peg.3165_10346	re03.peg.6153_20379	re05.peg.215_28678	re06.peg.1168_36196	re07.peg.282_42495	re08.peg.106_48491	re09.peg.1038_55920	re14.peg.5592_101421	re15.peg.8155_110806	re17.peg.3260_122166	re18.peg.3692_129527	re19.peg.5516_138062	re20.peg.1903_140677	re22.peg.6271_159063	re04.peg.2282_23587	re10.peg.6674_68249	re11.peg.1154_71878	re12.peg.218_79704	re13.peg.6139_94771	re16.peg.5049_116983	re21.peg.3292_149368	rq23.peg.5944_172523	rq24.peg.643_173981	rq25.peg.1419_181215	rq26.peg.4882_191406	rq27.peg.2356_196160	rq28.peg.6483_206708	re30.peg.4509_164178	rq29.peg.2566_211286
288	group_11627	hypothetical protein	30	30	1	312	29851				464	713	703	re01.peg.5094_5093	re02.peg.3164_10345	re03.peg.6152_20378	re05.peg.216_28679	re06.peg.1167_36195	re07.peg.283_42496	re08.peg.107_48492	re09.peg.1039_55921	re14.peg.5591_101420	re15.peg.8152_110803	re17.peg.3259_122165	re18.peg.3693_129528	re19.peg.5515_138061	re20.peg.1902_140676	re22.peg.6270_159062	re04.peg.2283_23588	re10.peg.6675_68250	re11.peg.1153_71877	re12.peg.219_79705	re13.peg.6138_94770	re16.peg.5048_116982	re21.peg.3293_149369	rq23.peg.5943_172522	rq24.peg.644_173982	rq25.peg.1418_181214	rq26.peg.4881_191405	rq27.peg.2357_196161	rq28.peg.6484_206709	re30.peg.4508_164177	rq29.peg.2567_211287
289	group_11628	putative sulfate transporter	30	30	1	312	29847				1184	1700	1665	re01.peg.5095_5094	re02.peg.3163_10344	re03.peg.6151_20377	re05.peg.217_28680	re06.peg.1166_36194	re07.peg.284_42497	re08.peg.108_48493	re09.peg.1040_55922	re14.peg.5590_101419	re15.peg.8150_110801	re17.peg.3258_122164	re18.peg.3694_129529	re19.peg.5514_138060	re20.peg.1901_140675	re22.peg.6269_159061	re04.peg.2284_23589	re10.peg.6677_68252	re11.peg.1152_71876	re12.peg.220_79706	re13.peg.6137_94769	re16.peg.5047_116981	re21.peg.3294_149370	rq23.peg.5942_172521	rq24.peg.645_173983	rq25.peg.1417_181213	rq26.peg.4880_191404	rq27.peg.2358_196162	rq28.peg.6485_206710	re30.peg.4507_164176	rq29.peg.2568_211288
290	group_11639	transcriptional regulator CdaR	30	30	1	312	29744				1106	1211	1207	re01.peg.5154_5153	re02.peg.3109_10290	re03.peg.3961_18187	re05.peg.276_28739	re06.peg.1114_36142	re07.peg.341_42554	re08.peg.166_48551	re09.peg.1091_55973	re14.peg.5538_101367	re15.peg.8025_110676	re17.peg.3198_122104	re18.peg.38_125874	re19.peg.5457_138003	re20.peg.1849_140623	re22.peg.6218_159010	re04.peg.5635_26940	re10.peg.4630_66205	re11.peg.1081_71805	re12.peg.304_79790	re13.peg.1178_89810	re16.peg.4993_116927	re21.peg.3354_149430	rq23.peg.5887_172466	rq24.peg.699_174037	rq25.peg.1361_181157	rq26.peg.4829_191353	rq27.peg.2414_196218	rq28.peg.2104_202330	re30.peg.4337_164006	rq29.peg.2623_211343
291	group_11641	Transcriptional regulator IclR family	30	30	1	312	29697				545	776	745	re01.peg.5167_5166	re02.peg.3094_10275	re03.peg.3974_18200	re05.peg.289_28752	re06.peg.1101_36129	re07.peg.354_42567	re08.peg.179_48564	re09.peg.1104_55986	re14.peg.5525_101354	re15.peg.8008_110659	re17.peg.3178_122084	re18.peg.52_125888	re19.peg.5444_137990	re20.peg.1836_140610	re22.peg.6205_158997	re04.peg.5655_26960	re10.peg.4646_66221	re11.peg.1049_71773	re12.peg.324_79810	re13.peg.1197_89829	re16.peg.4973_116907	re21.peg.3366_149442	rq23.peg.5868_172447	rq24.peg.718_174056	rq25.peg.1341_181137	rq26.peg.4810_191334	rq27.peg.2434_196238	rq28.peg.2124_202350	re30.peg.4318_163987	rq29.peg.2643_211363
292	group_11642	FIG00995007: hypothetical protein	30	30	1	312	8308				239	1370	1321	re01.peg.5185_5184	re02.peg.150_7331	re03.peg.25_14251	re05.peg.5421_33884	re06.peg.5597_40624	re07.peg.2379_44592	re08.peg.6175_54560	re09.peg.5073_59955	re14.peg.1488_97317	re15.peg.2310_104961	re17.peg.3002_121908	re18.peg.4909_130744	re19.peg.1429_133975	re20.peg.6266_145040	re22.peg.1954_154746	re04.peg.5817_27122	re10.peg.5893_67468	re11.peg.4490_75214	re12.peg.4931_84417	re13.peg.1361_89993	re16.peg.6018_117952	re21.peg.4499_150575	rq23.peg.1548_168127	rq24.peg.4435_177773	rq25.peg.3900_183696	rq26.peg.3739_190263	rq27.peg.387_194191	rq28.peg.7076_207301	re30.peg.5791_165460	rq29.peg.539_209259
293	group_11643	Oligopeptide ABC transporter periplasmic oligopeptide-binding protein OppA (TC 3.A.1.5.1)	30	30	1	312	8318				893	1640	1595	re01.peg.5190_5189	re02.peg.156_7337	re03.peg.30_14256	re05.peg.5416_33879	re06.peg.5592_40619	re07.peg.2374_44587	re08.peg.6180_54565	re09.peg.5078_59960	re14.peg.1483_97312	re15.peg.2301_104952	re17.peg.2997_121903	re18.peg.4904_130739	re19.peg.1424_133970	re20.peg.6261_145035	re22.peg.1949_154741	re04.peg.5822_27127	re10.peg.5886_67461	re11.peg.4484_75208	re12.peg.4923_84409	re13.peg.1366_89998	re16.peg.6023_117957	re21.peg.4504_150580	rq23.peg.1543_168122	rq24.peg.4440_177778	rq25.peg.3905_183701	rq26.peg.3734_190258	rq27.peg.392_194196	rq28.peg.7071_207296	re30.peg.5786_165455	rq29.peg.534_209254
294	group_11645	Hypothetical NagD-like phosphatase Actinobacterial subfamily	30	30	1	312	8350				569	815	797	re01.peg.5198_5197	re02.peg.167_7348	re03.peg.39_14265	re05.peg.5406_33869	re06.peg.5583_40610	re07.peg.2364_44577	re08.peg.6289_54674	re09.peg.5087_59969	re14.peg.1474_97303	re15.peg.2291_104942	re17.peg.2989_121895	re18.peg.4895_130730	re19.peg.1415_133961	re20.peg.6252_145026	re22.peg.1940_154732	re04.peg.5831_27136	re10.peg.5874_67449	re11.peg.4470_75194	re12.peg.4912_84398	re13.peg.1375_90007	re16.peg.6032_117966	re21.peg.4513_150589	rq23.peg.1533_168112	rq24.peg.4449_177787	rq25.peg.3914_183710	rq26.peg.3725_190249	rq27.peg.401_194205	rq28.peg.7060_207285	re30.peg.5777_165446	rq29.peg.525_209245
295	group_11648	O-acetylhomoserine sulfhydrylase / O-succinylhomoserine sulfhydrylase	30	30	1	312	8367				665	1223	1185	re01.peg.5207_5206	re02.peg.174_7355	re03.peg.46_14272	re05.peg.5399_33862	re06.peg.5575_40602	re07.peg.2357_44570	re08.peg.6282_54667	re09.peg.5094_59976	re14.peg.1467_97296	re15.peg.2278_104929	re17.peg.2981_121887	re18.peg.4886_130721	re19.peg.1408_133954	re20.peg.6244_145018	re22.peg.1933_154725	re04.peg.5839_27144	re10.peg.5866_67441	re11.peg.4462_75186	re12.peg.4904_84390	re13.peg.1383_90015	re16.peg.6040_117974	re21.peg.4520_150596	rq23.peg.1525_168104	rq24.peg.4457_177795	rq25.peg.3922_183718	rq26.peg.3717_190241	rq27.peg.408_194212	rq28.peg.5558_205783	re30.peg.5769_165438	rq29.peg.517_209237
296	group_11651	hypothetical protein	30	30	1	312	8387				146	146	146	re01.peg.5214_5213	re02.peg.181_7362	re03.peg.53_14279	re05.peg.5392_33855	re06.peg.5568_40595	re07.peg.2350_44563	re08.peg.3940_52325	re09.peg.5101_59983	re14.peg.1460_97289	re15.peg.2264_104915	re17.peg.2974_121880	re18.peg.4879_130714	re19.peg.1401_133947	re20.peg.6237_145011	re22.peg.1926_154718	re04.peg.5846_27151	re10.peg.5853_67428	re11.peg.4454_75178	re12.peg.4894_84380	re13.peg.1390_90022	re16.peg.6047_117981	re21.peg.4527_150603	rq23.peg.1518_168097	rq24.peg.4464_177802	rq25.peg.3929_183725	rq26.peg.3710_190234	rq27.peg.415_194219	rq28.peg.5551_205776	re30.peg.5762_165431	rq29.peg.510_209230
297	group_11652	5 nucleotidase deoxy cytosolic type C	30	30	1	312	8400				470	470	470	re01.peg.5224_5223	re02.peg.192_7373	re03.peg.64_14290	re05.peg.5381_33844	re06.peg.5557_40584	re07.peg.2339_44552	re08.peg.3929_52314	re09.peg.5112_59994	re14.peg.1449_97278	re15.peg.2249_104900	re17.peg.2963_121869	re18.peg.4869_130704	re19.peg.1390_133936	re20.peg.6226_145000	re22.peg.1915_154707	re04.peg.5856_27161	re10.peg.5841_67416	re11.peg.4441_75165	re12.peg.4879_84365	re13.peg.1400_90032	re16.peg.6057_117991	re21.peg.4537_150613	rq23.peg.1508_168087	rq24.peg.4474_177812	rq25.peg.3939_183735	rq26.peg.3700_190224	rq27.peg.425_194229	rq28.peg.5540_205765	re30.peg.5752_165421	rq29.peg.500_209220
298	group_11653	DedA protein	30	30	1	312	8447				479	662	652	re01.peg.5244_5243	re02.peg.216_7397	re03.peg.3515_17741	re05.peg.5361_33824	re06.peg.2420_37448	re07.peg.2319_44532	re08.peg.3909_52294	re09.peg.5132_60014	re14.peg.1429_97258	re15.peg.2220_104871	re17.peg.2944_121850	re18.peg.5625_131460	re19.peg.1371_133917	re20.peg.6200_144974	re22.peg.1895_154687	re04.peg.5982_27287	re10.peg.8522_70097	re11.peg.8116_78840	re12.peg.2933_82419	re13.peg.1419_90051	re16.peg.6076_118010	re21.peg.4556_150632	rq23.peg.1489_168068	rq24.peg.5768_179106	rq25.peg.3959_183755	rq26.peg.3681_190205	rq27.peg.444_194248	rq28.peg.5519_205744	re30.peg.5732_165401	rq29.peg.480_209200
299	group_11656	possible transcriptional regulator MarR family	30	30	1	312	8474				158	872	438	re01.peg.5257_5256	re02.peg.231_7412	re03.peg.3528_17754	re05.peg.5348_33811	re06.peg.2407_37435	re07.peg.2306_44519	re08.peg.3896_52281	re09.peg.5145_60027	re14.peg.1416_97245	re15.peg.2204_104855	re17.peg.2931_121837	re18.peg.5638_131473	re19.peg.1358_133904	re20.peg.6186_144960	re22.peg.1882_154674	re04.peg.5996_27301	re10.peg.5373_66948	re11.peg.4283_75007	re12.peg.2915_82401	re13.peg.1433_90065	re16.peg.6090_118024	re21.peg.4570_150646	rq23.peg.1476_168055	rq24.peg.5754_179092	rq25.peg.3973_183769	rq26.peg.3667_190191	rq27.peg.457_194261	rq28.peg.5504_205729	re30.peg.5718_165387	rq29.peg.467_209187
300	group_11659	Probable short-chain dehydrogenase	30	30	1	312	8480				536	896	792	re01.peg.5260_5259	re02.peg.234_7415	re03.peg.3531_17757	re05.peg.5345_33808	re06.peg.2404_37432	re07.peg.2303_44516	re08.peg.3893_52278	re09.peg.5148_60030	re14.peg.1413_97242	re15.peg.2200_104851	re17.peg.2928_121834	re18.peg.5641_131476	re19.peg.1355_133901	re20.peg.6183_144957	re22.peg.1879_154671	re04.peg.5999_27304	re10.peg.5368_66943	re11.peg.4278_75002	re12.peg.2910_82396	re13.peg.1436_90068	re16.peg.6093_118027	re21.peg.4573_150649	rq23.peg.1473_168052	rq24.peg.5751_179089	rq25.peg.3976_183772	rq26.peg.3664_190188	rq27.peg.460_194264	rq28.peg.5500_205725	re30.peg.5715_165384	rq29.peg.464_209184
301	group_11661	CitH citrate transporter	30	30	1	312	8505				986	2486	1406	re01.peg.5269_5268	re02.peg.246_7427	re03.peg.3539_17765	re05.peg.5336_33799	re06.peg.2396_37424	re07.peg.2294_44507	re08.peg.3885_52270	re09.peg.5156_60038	re14.peg.1405_97234	re15.peg.2189_104840	re17.peg.2920_121826	re18.peg.5650_131485	re19.peg.1347_133893	re20.peg.6175_144949	re22.peg.1871_154663	re04.peg.6007_27312	re10.peg.5353_66928	re11.peg.4266_74990	re12.peg.2898_82384	re13.peg.1444_90076	re16.peg.6101_118035	re21.peg.4582_150658	rq23.peg.1464_168043	rq24.peg.5743_179081	rq25.peg.3985_183781	rq26.peg.3656_190180	rq27.peg.468_194272	rq28.peg.5491_205716	re30.peg.5707_165376	rq29.peg.455_209175
302	group_11663	two-component system response regulator	30	30	1	312	8511				683	710	683	re01.peg.5272_5271	re02.peg.248_7429	re03.peg.3542_17768	re05.peg.5333_33796	re06.peg.2393_37421	re07.peg.2291_44504	re08.peg.3882_52267	re09.peg.5159_60041	re14.peg.1402_97231	re15.peg.2184_104835	re17.peg.2917_121823	re18.peg.5653_131488	re19.peg.1344_133890	re20.peg.6172_144946	re22.peg.1868_154660	re04.peg.6010_27315	re10.peg.5349_66924	re11.peg.4262_74986	re12.peg.2894_82380	re13.peg.1447_90079	re16.peg.6104_118038	re21.peg.4585_150661	rq23.peg.1461_168040	rq24.peg.5740_179078	rq25.peg.3988_183784	rq26.peg.3653_190177	rq27.peg.471_194275	rq28.peg.5487_205712	re30.peg.5704_165373	rq29.peg.452_209172
303	group_11675	putative acyl carrier protein phosphodiesterase 1 (ACP phosphodiesterase 1)( EC:3.1.4.14 )	30	30	1	312	8582				614	644	641	re01.peg.5313_5312	re02.peg.287_7468	re03.peg.3577_17803	re05.peg.5295_33758	re06.peg.2359_37387	re07.peg.2256_44469	re08.peg.3848_52233	re09.peg.5193_60075	re14.peg.1367_97196	re15.peg.2134_104785	re17.peg.2882_121788	re18.peg.5691_131526	re19.peg.1308_133854	re20.peg.6130_144904	re22.peg.1833_154625	re04.peg.3975_25280	re10.peg.5294_66869	re11.peg.4214_74938	re12.peg.2837_82323	re13.peg.1489_90121	re16.peg.6145_118079	re21.peg.4627_150703	rq23.peg.1421_168000	rq24.peg.5700_179038	rq25.peg.4030_183826	rq26.peg.3613_190137	rq27.peg.511_194315	rq28.peg.7489_207714	re30.peg.5657_165326	rq29.peg.410_209130
304	group_11676	Isoniazid inductible protein IniC	30	30	1	312	8584				782	1484	1443	re01.peg.5315_5314	re02.peg.290_7471	re03.peg.3579_17805	re05.peg.5293_33756	re06.peg.2357_37385	re07.peg.2254_44467	re08.peg.3846_52231	re09.peg.5195_60077	re14.peg.1365_97194	re15.peg.2130_104781	re17.peg.2880_121786	re18.peg.5693_131528	re19.peg.1306_133852	re20.peg.6128_144902	re22.peg.1831_154623	re04.peg.3977_25282	re10.peg.5292_66867	re11.peg.4211_74935	re12.peg.2834_82320	re13.peg.1491_90123	re16.peg.6147_118081	re21.peg.4629_150705	rq23.peg.1419_167998	rq24.peg.5698_179036	rq25.peg.4032_183828	rq26.peg.3611_190135	rq27.peg.513_194317	rq28.peg.7491_207716	re30.peg.5655_165324	rq29.peg.408_209128
305	group_11691	Rrf2-linked NADH-flavin reductase	30	30	1	312	29401				191	638	612	re01.peg.5647_5646	re02.peg.2951_10132	re03.peg.2630_16856	re05.peg.420_28883	re06.peg.5792_40818	re07.peg.484_42697	re08.peg.315_48700	re09.peg.1240_56122	re14.peg.5389_101218	re15.peg.7807_110458	re17.peg.3029_121935	re18.peg.195_126031	re19.peg.5306_137852	re20.peg.1699_140473	re22.peg.6070_158862	re04.peg.6739_28044	re10.peg.1876_63451	re11.peg.2671_73395	re12.peg.3420_82906	re13.peg.1332_89964	re16.peg.692_112626	re21.peg.3503_149579	rq23.peg.5666_172245	rq24.peg.853_174191	rq25.peg.1204_181000	rq26.peg.4672_191196	rq27.peg.2568_196372	rq28.peg.6422_206647	re30.peg.4181_163850	rq29.peg.2827_211547
306	group_11694	Transcriptional regulator ArsR family	30	30	1	312	29437				347	377	376	re01.peg.5678_5677	re02.peg.2977_10158	re03.peg.2656_16882	re05.peg.398_28861	re06.peg.674_35702	re07.peg.462_42675	re08.peg.289_48674	re09.peg.1217_56099	re14.peg.5415_101244	re15.peg.7846_110497	re17.peg.3050_121956	re18.peg.170_126006	re19.peg.5331_137877	re20.peg.1723_140497	re22.peg.6092_158884	re04.peg.5264_26569	re10.peg.1848_63423	re11.peg.2649_73373	re12.peg.3394_82880	re13.peg.1311_89943	re16.peg.713_112647	re21.peg.3481_149557	rq23.peg.5687_172266	rq24.peg.832_174170	rq25.peg.1225_181021	rq26.peg.4694_191218	rq27.peg.2547_196351	rq28.peg.2255_202481	re30.peg.4203_163872	rq29.peg.2806_211526
307	group_11695	Enoyl-CoA hydratase	30	30	1	312	29469				476	803	792	re01.peg.5691_5690	re02.peg.2992_10173	re03.peg.2669_16895	re05.peg.385_28848	re06.peg.687_35715	re07.peg.449_42662	re08.peg.276_48661	re09.peg.1204_56086	re14.peg.5428_101257	re15.peg.7866_110517	re17.peg.3063_121969	re18.peg.155_125991	re19.peg.5344_137890	re20.peg.1736_140510	re22.peg.6105_158897	re04.peg.5277_26582	re10.peg.1831_63406	re11.peg.2631_73355	re12.peg.3376_82862	re13.peg.1298_89930	re16.peg.726_112660	re21.peg.3468_149544	rq23.peg.5700_172279	rq24.peg.819_174157	rq25.peg.1238_181034	rq26.peg.4707_191231	rq27.peg.2534_196338	rq28.peg.2239_202465	re30.peg.4216_163885	rq29.peg.2793_211513
308	group_11702	hypothetical protein	30	30	1	312	29525				401	617	428	re01.peg.5738_5737	re02.peg.3029_10210	re03.peg.2704_16930	re05.peg.350_28813	re06.peg.1037_36065	re07.peg.414_42627	re08.peg.241_48626	re09.peg.1169_56051	re14.peg.5463_101292	re15.peg.7919_110570	re17.peg.3099_122005	re18.peg.120_125956	re19.peg.5379_137925	re20.peg.1771_140545	re22.peg.6140_158932	re04.peg.5312_26617	re10.peg.1784_63359	re11.peg.2586_73310	re12.peg.5138_84624	re13.peg.1262_89894	re16.peg.773_112707	re21.peg.3432_149508	rq23.peg.5736_172315	rq24.peg.783_174121	rq25.peg.1275_181071	rq26.peg.4744_191268	rq27.peg.2499_196303	rq28.peg.2197_202423	re30.peg.4252_163921	rq29.peg.2757_211477
309	group_11704	hypothetical protein	30	30	1	312	29556				569	626	622	re01.peg.5753_5752	re02.peg.3046_10227	re03.peg.2722_16948	re05.peg.333_28796	re06.peg.1054_36082	re07.peg.397_42610	re08.peg.224_48609	re09.peg.1151_56033	re14.peg.5478_101307	re15.peg.7940_110591	re17.peg.3117_122023	re18.peg.102_125938	re19.peg.5397_137943	re20.peg.1788_140562	re22.peg.6158_158950	re04.peg.5329_26634	re10.peg.1763_63338	re11.peg.2566_73290	re12.peg.5114_84600	re13.peg.1245_89877	re16.peg.790_112724	re21.peg.3414_149490	rq23.peg.5753_172332	rq24.peg.766_174104	rq25.peg.1293_181089	rq26.peg.4762_191286	rq27.peg.2481_196285	rq28.peg.2180_202406	re30.peg.4270_163939	rq29.peg.2739_211459
310	group_11707	Enoyl-CoA hydratase	30	30	1	312	29575				524	728	714	re01.peg.5767_5766	re02.peg.3061_10242	re03.peg.4007_18233	re05.peg.319_28782	re06.peg.1068_36096	re07.peg.383_42596	re08.peg.210_48595	re09.peg.1137_56019	re14.peg.5492_101321	re15.peg.7958_110609	re17.peg.3130_122036	re18.peg.88_125924	re19.peg.5411_137957	re20.peg.1802_140576	re22.peg.6172_158964	re04.peg.6320_27625	re10.peg.1746_63321	re11.peg.1009_71733	re12.peg.5093_84579	re13.peg.1231_89863	re16.peg.804_112738	re21.peg.3400_149476	rq23.peg.5767_172346	rq24.peg.752_174090	rq25.peg.1307_181103	rq26.peg.4776_191300	rq27.peg.2467_196271	rq28.peg.2164_202390	re30.peg.4284_163953	rq29.peg.2678_211398
311	group_11710	FIG00999926: hypothetical protein	30	30	1	312	29589				1028	1139	1131	re01.peg.5775_5774	re02.peg.3069_10250	re03.peg.3999_18225	re05.peg.311_28774	re06.peg.1076_36104	re07.peg.375_42588	re08.peg.204_48589	re09.peg.1129_56011	re14.peg.5500_101329	re15.peg.7970_110621	re17.peg.3138_122044	re18.peg.80_125916	re19.peg.5419_137965	re20.peg.1810_140584	re22.peg.6180_158972	re04.peg.6328_27633	re10.peg.1737_63312	re11.peg.1017_71741	re12.peg.5082_84568	re13.peg.1223_89855	re16.peg.812_112746	re21.peg.3392_149468	rq23.peg.5775_172354	rq24.peg.744_174082	rq25.peg.1315_181111	rq26.peg.4784_191308	rq27.peg.2459_196263	rq28.peg.2156_202382	re30.peg.4292_163961	rq29.peg.2670_211390
312	group_11713	FIG00995475: hypothetical protein	30	30	1	312	25972				506	665	537	re01.peg.5846_5845	re02.peg.4095_11276	re03.peg.3856_18082	re05.peg.6315_34778	re06.peg.5752_40778	re07.peg.2844_45057	re08.peg.4894_53279	re09.peg.2555_57437	re14.peg.4002_99831	re15.peg.5924_108575	re17.peg.4747_123653	re18.peg.2537_128373	re19.peg.3955_136501	re20.peg.6080_144854	re22.peg.4726_157518	re04.peg.4388_25693	re10.peg.7104_68679	re11.peg.7696_78420	re12.peg.6966_86452	re13.peg.456_89088	re16.peg.3727_115661	re21.peg.5235_151311	rq23.peg.4203_170782	rq24.peg.5940_179278	rq25.peg.5433_185229	rq26.peg.6263_192787	rq27.peg.5974_199778	rq28.peg.4698_204924	re30.peg.2877_162546	rq29.peg.6341_215061
313	group_11715	RNA polymerase sigma-70 factor	30	30	1	312	26014				227	821	794	re01.peg.5866_5865	re02.peg.4069_11250	re03.peg.3876_18102	re05.peg.6294_34757	re06.peg.5746_40772	re07.peg.2864_45077	re08.peg.4874_53259	re09.peg.2535_57417	re14.peg.4022_99851	re15.peg.5950_108601	re17.peg.4767_123673	re18.peg.2517_128353	re19.peg.3975_136521	re20.peg.6102_144876	re22.peg.4746_157538	re04.peg.4408_25713	re10.peg.7885_69460	re11.peg.7521_78245	re12.peg.7716_87202	re13.peg.436_89068	re16.peg.3747_115681	re21.peg.5337_151413	rq23.peg.4223_170802	rq24.peg.5920_179258	rq25.peg.5413_185209	rq26.peg.6243_192767	rq27.peg.5954_199758	rq28.peg.4671_204897	re30.peg.2897_162566	rq29.peg.6321_215041
314	group_11716	DNA-3-methyladenine glycosylase	30	30	1	312	26024				524	623	569	re01.peg.5872_5871	re02.peg.4063_11244	re03.peg.3882_18108	re05.peg.6288_34751	re06.peg.5740_40766	re07.peg.2870_45083	re08.peg.4868_53253	re09.peg.2529_57411	re14.peg.4028_99857	re15.peg.5957_108608	re17.peg.4773_123679	re18.peg.2511_128347	re19.peg.3981_136527	re20.peg.6108_144882	re22.peg.4752_157544	re04.peg.4414_25719	re10.peg.7878_69453	re11.peg.7514_78238	re12.peg.7724_87210	re13.peg.430_89062	re16.peg.3753_115687	re21.peg.5331_151407	rq23.peg.4229_170808	rq24.peg.5914_179252	rq25.peg.5407_185203	rq26.peg.6237_192761	rq27.peg.5948_199752	rq28.peg.4664_204890	re30.peg.2903_162572	rq29.peg.6315_215035
315	group_11730	POSSIBLE ACYL-CoA DEHYDROGENASE FADE36	30	30	1	312	28569				290	1025	981	re01.peg.6137_6136	re02.peg.2687_9868	re03.peg.2400_16626	re05.peg.679_29142	re06.peg.1492_36520	re07.peg.713_42926	re08.peg.547_48932	re09.peg.1459_56341	re14.peg.5173_101002	re15.peg.7473_110124	re17.peg.5268_124174	re18.peg.455_126291	re19.peg.5060_137606	re20.peg.1445_140219	re22.peg.5852_158644	re04.peg.5233_26538	re10.peg.543_62118	re11.peg.744_71468	re12.peg.4763_84249	re13.peg.5895_94527	re16.peg.2104_114038	re21.peg.732_146808	rq23.peg.5433_172012	rq24.peg.1101_174439	rq25.peg.984_180780	rq26.peg.2718_189242	rq27.peg.2887_196691	rq28.peg.5240_205465	re30.peg.3963_163632	rq29.peg.2072_210792
316	group_11731	FIG00996892: hypothetical protein	30	30	1	312	28567				350	533	514	re01.peg.6139_6138	re02.peg.2685_9866	re03.peg.2398_16624	re05.peg.681_29144	re06.peg.1490_36518	re07.peg.715_42928	re08.peg.549_48934	re09.peg.1461_56343	re14.peg.5171_101000	re15.peg.7471_110122	re17.peg.5266_124172	re18.peg.457_126293	re19.peg.5058_137604	re20.peg.1443_140217	re22.peg.5850_158642	re04.peg.5230_26535	re10.peg.546_62121	re11.peg.740_71464	re12.peg.4765_84251	re13.peg.5897_94529	re16.peg.2102_114036	re21.peg.730_146806	rq23.peg.5431_172010	rq24.peg.1103_174441	rq25.peg.982_180778	rq26.peg.2720_189244	rq27.peg.2889_196693	rq28.peg.5243_205468	re30.peg.3961_163630	rq29.peg.2070_210790
317	group_11734	Aldehyde dehydrogenase	30	30	1	312	28539				377	1376	1327	re01.peg.6151_6150	re02.peg.2672_9853	re03.peg.2385_16611	re05.peg.694_29157	re06.peg.1477_36505	re07.peg.729_42942	re08.peg.562_48947	re09.peg.1475_56357	re14.peg.5158_100987	re15.peg.7454_110105	re17.peg.5252_124158	re18.peg.471_126307	re19.peg.5044_137590	re20.peg.1429_140203	re22.peg.5836_158628	re04.peg.5216_26521	re10.peg.562_62137	re11.peg.724_71448	re12.peg.4783_84269	re13.peg.5910_94542	re16.peg.2089_114023	re21.peg.715_146791	rq23.peg.5418_171997	rq24.peg.1116_174454	rq25.peg.969_180765	rq26.peg.2733_189257	rq27.peg.2902_196706	rq28.peg.5260_205485	re30.peg.3948_163617	rq29.peg.2057_210777
318	group_11735	hypothetical protein	30	30	1	312	28536				317	632	621	re01.peg.6153_6152	re02.peg.2670_9851	re03.peg.2383_16609	re05.peg.696_29159	re06.peg.1475_36503	re07.peg.731_42944	re08.peg.564_48949	re09.peg.1477_56359	re14.peg.5156_100985	re15.peg.7450_110101	re17.peg.5249_124155	re18.peg.474_126310	re19.peg.5042_137588	re20.peg.1427_140201	re22.peg.5834_158626	re04.peg.5213_26518	re10.peg.566_62141	re11.peg.721_71445	re12.peg.4787_84273	re13.peg.5913_94545	re16.peg.2086_114020	re21.peg.712_146788	rq23.peg.5415_171994	rq24.peg.1119_174457	rq25.peg.967_180763	rq26.peg.2736_189260	rq27.peg.2905_196709	rq28.peg.5264_205489	re30.peg.3945_163614	rq29.peg.2054_210774
319	group_11737	Uncharacterized protein Rv2599/MT2674 precursor	30	30	1	312	28534				359	392	367	re01.peg.6155_6154	re02.peg.2668_9849	re03.peg.2381_16607	re05.peg.698_29161	re06.peg.1473_36501	re07.peg.733_42946	re08.peg.566_48951	re09.peg.1479_56361	re14.peg.5154_100983	re15.peg.7448_110099	re17.peg.5247_124153	re18.peg.476_126312	re19.peg.5040_137586	re20.peg.1425_140199	re22.peg.5832_158624	re04.peg.5211_26516	re10.peg.568_62143	re11.peg.719_71443	re12.peg.4789_84275	re13.peg.5915_94547	re16.peg.2084_114018	re21.peg.710_146786	rq23.peg.5413_171992	rq24.peg.1121_174459	rq25.peg.965_180761	rq26.peg.2738_189262	rq27.peg.2907_196711	rq28.peg.5266_205491	re30.peg.3943_163612	rq29.peg.2052_210772
320	group_11738	L-carnitine dehydratase/bile acid-inducible protein F	30	30	1	312	28514				590	1208	1176	re01.peg.6168_6167	re02.peg.2655_9836	re03.peg.2368_16594	re05.peg.711_29174	re06.peg.4717_39744	re07.peg.746_42959	re08.peg.579_48964	re09.peg.1492_56374	re14.peg.5141_100970	re15.peg.7427_110078	re17.peg.5235_124141	re18.peg.490_126326	re19.peg.5027_137573	re20.peg.1411_140185	re22.peg.5819_158611	re04.peg.5199_26504	re10.peg.585_62160	re11.peg.700_71424	re12.peg.5025_84511	re13.peg.5927_94559	re16.peg.2072_114006	re21.peg.698_146774	rq23.peg.5401_171980	rq24.peg.1133_174471	rq25.peg.953_180749	rq26.peg.2750_189274	rq27.peg.2919_196723	rq28.peg.5279_205504	re30.peg.3931_163600	rq29.peg.2040_210760
321	group_11748	Indole-3-glycerol phosphate synthase	30	30	1	312	20430				728	851	803	re01.peg.6324_6323	re02.peg.5717_12898	re03.peg.3208_17434	re05.peg.5674_34137	re06.peg.6022_41048	re07.peg.5292_47505	re08.peg.4505_52890	re09.peg.3330_58212	re14.peg.3231_99060	re15.peg.4791_107442	re17.peg.4422_123328	re18.peg.5040_130875	re19.peg.3166_135712	re20.peg.5244_144018	re22.peg.3899_156691	re04.peg.4863_26168	re10.peg.4061_65636	re11.peg.2904_73628	re12.peg.2299_81785	re13.peg.6080_94712	re16.peg.3832_115766	re21.peg.4235_150311	rq23.peg.3425_170004	rq24.peg.6059_179397	rq25.peg.6219_186015	rq26.peg.3203_189727	rq27.peg.3769_197573	rq28.peg.4246_204472	re30.peg.1951_161620	rq29.peg.1587_210307
322	group_11750	Sorbitol-6-phosphate 2-dehydrogenase	30	30	1	312	20386				248	806	782	re01.peg.6348_6347	re02.peg.5745_12926	re03.peg.3232_17458	re05.peg.5698_34161	re06.peg.5998_41024	re07.peg.5268_47481	re08.peg.4481_52866	re09.peg.3306_58188	re14.peg.3255_99084	re15.peg.4819_107470	re17.peg.4446_123352	re18.peg.5014_130849	re19.peg.3190_135736	re20.peg.5268_144042	re22.peg.3923_156715	re04.peg.4887_26192	re10.peg.7385_68960	re11.peg.5870_76594	re12.peg.6616_86102	re13.peg.6055_94687	re16.peg.3808_115742	re21.peg.4211_150287	rq23.peg.3449_170028	rq24.peg.6083_179421	rq25.peg.6195_185991	rq26.peg.3179_189703	rq27.peg.3793_197597	rq28.peg.4275_204501	re30.peg.1975_161644	rq29.peg.1563_210283
323	group_11751	FIG01001059: hypothetical protein	30	30	1	312	20381				539	932	847	re01.peg.6351_6350	re02.peg.5748_12929	re03.peg.3235_17461	re05.peg.5701_34164	re06.peg.5995_41021	re07.peg.5265_47478	re08.peg.4478_52863	re09.peg.3303_58185	re14.peg.3258_99087	re15.peg.4823_107474	re17.peg.4449_123355	re18.peg.5011_130846	re19.peg.3193_135739	re20.peg.5271_144045	re22.peg.3926_156718	re04.peg.4890_26195	re10.peg.7381_68956	re11.peg.5866_76590	re12.peg.6612_86098	re13.peg.6052_94684	re16.peg.3805_115739	re21.peg.4208_150284	rq23.peg.3452_170031	rq24.peg.6086_179424	rq25.peg.6192_185988	rq26.peg.3176_189700	rq27.peg.3796_197600	rq28.peg.4278_204504	re30.peg.1978_161647	rq29.peg.1560_210280
324	group_11754	putative ABC transporter ATP-binding protein	30	30	1	312	20622				635	746	731	re01.peg.6362_6361	re02.peg.5639_12820	re03.peg.3138_17364	re05.peg.5601_34064	re06.peg.6669_41695	re07.peg.5361_47574	re08.peg.4577_52962	re09.peg.3399_58281	re14.peg.3160_98989	re15.peg.4696_107347	re17.peg.4353_123259	re18.peg.5113_130948	re19.peg.3096_135642	re20.peg.5173_143947	re22.peg.3814_156606	re04.peg.6374_27679	re10.peg.3969_65544	re11.peg.2995_73719	re12.peg.2397_81883	re13.peg.3633_92265	re16.peg.3904_115838	re21.peg.4313_150389	rq23.peg.3355_169934	rq24.peg.5989_179327	rq25.peg.6288_186084	rq26.peg.6393_192917	rq27.peg.3688_197492	rq28.peg.7056_207281	re30.peg.1867_161536	rq29.peg.6403_215123
325	group_11758	Acetylornithine aminotransferase	30	30	1	312	20606				713	1199	1159	re01.peg.6371_6370	re02.peg.5650_12831	re03.peg.3147_17373	re05.peg.5610_34073	re06.peg.6660_41686	re07.peg.5352_47565	re08.peg.4568_52953	re09.peg.3390_58272	re14.peg.3169_98998	re15.peg.4707_107358	re17.peg.4362_123268	re18.peg.5104_130939	re19.peg.3105_135651	re20.peg.5182_143956	re22.peg.3823_156615	re04.peg.6365_27670	re10.peg.3979_65554	re11.peg.2983_73707	re12.peg.2387_81873	re13.peg.3624_92256	re16.peg.3895_115829	re21.peg.4304_150380	rq23.peg.3364_169943	rq24.peg.5998_179336	rq25.peg.6279_186075	rq26.peg.6402_192926	rq27.peg.3697_197501	rq28.peg.7046_207271	re30.peg.1876_161545	rq29.peg.6412_215132
326	group_11759	metallo-beta-lactamase superfamily protein	30	30	1	312	20551				668	686	685	re01.peg.6391_6390	re02.peg.5673_12854	re03.peg.3167_17393	re05.peg.5631_34094	re06.peg.6640_41666	re07.peg.5332_47545	re08.peg.4548_52933	re09.peg.3370_58252	re14.peg.3189_99018	re15.peg.4733_107384	re17.peg.4382_123288	re18.peg.5082_130917	re19.peg.3125_135671	re20.peg.5202_143976	re22.peg.3843_156635	re04.peg.6345_27650	re10.peg.4002_65577	re11.peg.2958_73682	re12.peg.2358_81844	re13.peg.3604_92236	re16.peg.3875_115809	re21.peg.4275_150351	rq23.peg.3384_169963	rq24.peg.6018_179356	rq25.peg.6259_186055	rq26.peg.6422_192946	rq27.peg.3717_197521	rq28.peg.7022_207247	re30.peg.1896_161565	rq29.peg.6432_215152
327	group_11775	Transcriptional regulator AsnC family	30	30	1	312	31164				470	572	487	re01.peg.6544_6543	re02.peg.1797_8978	re03.peg.3078_17304	re05.peg.3829_32292	6666666.340933.peg.324_35352	re07.peg.4152_46365	re08.peg.2891_51276	re09.peg.667_55549	re14.peg.5966_101795	re15.peg.8641_111292	re17.peg.5597_124503	re18.peg.2054_127890	re19.peg.5874_138420	re20.peg.2243_141017	re22.peg.6624_159416	re04.peg.5876_27181	re10.peg.5930_67505	re11.peg.5288_76012	re12.peg.4993_84479	re13.peg.6684_95316	re16.peg.1243_113177	re21.peg.2742_148818	rq23.peg.6296_172875	rq24.peg.3480_176818	rq25.peg.1996_181792	rq26.peg.6690_193214	rq27.peg.1979_195783	rq28.peg.5603_205828	re30.peg.4901_164570	rq29.peg.1785_210505
328	group_11776	NAD-dependent epimerase/dehydratase	30	30	1	312	31088				941	977	942	re01.peg.6571_6570	re02.peg.1775_8956	re03.peg.3097_17323	re05.peg.3856_32319	6666666.340933.peg.352_35380	re07.peg.4133_46346	re08.peg.2872_51257	re09.peg.648_55530	re14.peg.5993_101822	re15.peg.8672_111323	re17.peg.5623_124529	re18.peg.2082_127918	re19.peg.5902_138448	re20.peg.2262_141036	re22.peg.6643_159435	re04.peg.5902_27207	re10.peg.5971_67546	re11.peg.5322_76046	re12.peg.4957_84443	re13.peg.6710_95342	re16.peg.5169_117103	re21.peg.2781_148857	rq23.peg.6322_172901	rq24.peg.3454_176792	rq25.peg.1969_181765	rq26.peg.6664_193188	rq27.peg.1953_195757	rq28.peg.5583_205808	re30.peg.4927_164596	rq29.peg.1811_210531
329	group_11777	MutT/nudix family protein	30	30	1	312	31074				491	536	500	re01.peg.6578_6577	re02.peg.1770_8951	re03.peg.3104_17330	re05.peg.3861_32324	6666666.340933.peg.358_35386	re07.peg.4128_46341	re08.peg.2866_51251	re09.peg.643_55525	re14.peg.5998_101827	re15.peg.8682_111333	re17.peg.5630_124536	re18.peg.2087_127923	re19.peg.5909_138455	re20.peg.2269_141043	re22.peg.6650_159442	re04.peg.5909_27214	re10.peg.5981_67556	re11.peg.5327_76051	re12.peg.4950_84436	re13.peg.6717_95349	re16.peg.5176_117110	re21.peg.2786_148862	rq23.peg.6329_172908	rq24.peg.3449_176787	rq25.peg.1964_181760	rq26.peg.6659_193183	rq27.peg.1948_195752	rq28.peg.5578_205803	re30.peg.4932_164601	rq29.peg.1818_210538
330	group_11779	MCE-family protein Mce1F	30	30	1	312	15968				695	1394	1359	re01.peg.6636_6635	re02.peg.735_7916	re03.peg.6526_20752	re05.peg.2707_31170	re06.peg.4564_39591	re07.peg.5855_48068	re08.peg.1664_50049	re09.peg.5603_60485	re14.peg.939_96768	re15.peg.1555_104206	re17.peg.190_119096	re18.peg.1642_127478	re19.peg.891_133437	re20.peg.3260_142034	re22.peg.1430_154222	re04.peg.194_21499	re10.peg.915_62490	re11.peg.6284_77008	re12.peg.632_80118	re13.peg.1723_90355	re16.peg.2782_114716	re21.peg.5823_151899	rq23.peg.989_167568	rq24.peg.5264_178602	rq25.peg.3091_182887	rq26.peg.1318_187842	rq27.peg.942_194746	rq28.peg.811_201037	re30.peg.5227_164896	rq29.peg.4999_213719
331	group_11780	Butyryl-CoA dehydrogenase	30	30	1	312	15986				563	1121	1102	re01.peg.6647_6646	re02.peg.749_7930	re03.peg.6514_20740	re05.peg.2720_31183	re06.peg.4552_39579	re07.peg.5867_48080	re08.peg.1676_50061	re09.peg.5615_60497	re14.peg.927_96756	re15.peg.1539_104190	re17.peg.202_119108	re18.peg.1630_127466	re19.peg.879_133425	re20.peg.3248_142022	re22.peg.1419_154211	re04.peg.206_21511	re10.peg.929_62504	re11.peg.6267_76991	re12.peg.616_80102	re13.peg.1735_90367	re16.peg.2769_114703	re21.peg.5810_151886	rq23.peg.976_167555	rq24.peg.5252_178590	rq25.peg.3103_182899	rq26.peg.1331_187855	rq27.peg.954_194758	rq28.peg.823_201049	re30.peg.5215_164884	rq29.peg.4987_213707
332	group_11797	Peptide chain release factor 3	30	30	1	312	26479				1577	1892	1726	re01.peg.6675_6674	re02.peg.5383_12564	re03.peg.2162_16388	re05.peg.1599_30062	re06.peg.2521_37548	re07.peg.3055_45268	re08.peg.5828_54213	re09.peg.2353_57235	re14.peg.4204_100033	re15.peg.6200_108851	re17.peg.3509_122415	re18.peg.2328_128164	re19.peg.4149_136695	re20.peg.550_139324	re22.peg.4926_157718	re04.peg.2888_24193	re10.peg.5283_66858	re11.peg.4202_74926	re12.peg.6257_85743	re13.peg.3191_91823	re16.peg.2316_114250	re21.peg.6386_152462	rq23.peg.4490_171069	rq24.peg.3635_176973	rq25.peg.134_179930	rq26.peg.2096_188620	rq27.peg.5776_199580	rq28.peg.1481_201707	re30.peg.3084_162753	rq29.peg.1710_210430
333	group_11799	Ferrichrome ABC transporter	30	30	1	312	26503				677	992	964	re01.peg.6686_6685	re02.peg.5395_12576	re03.peg.2150_16376	re05.peg.1587_30050	re06.peg.2533_37560	re07.peg.3067_45280	re08.peg.5840_54225	re09.peg.2341_57223	re14.peg.4216_100045	re15.peg.6216_108867	re17.peg.3520_122426	re18.peg.2316_128152	re19.peg.4161_136707	re20.peg.562_139336	re22.peg.4938_157730	re04.peg.2901_24206	re10.peg.5268_66843	re11.peg.4189_74913	re12.peg.6237_85723	re13.peg.3179_91811	re16.peg.2327_114261	re21.peg.6375_152451	rq23.peg.4501_171080	rq24.peg.3646_176984	rq25.peg.146_179942	rq26.peg.2084_188608	rq27.peg.5764_199568	rq28.peg.1493_201719	re30.peg.3096_162765	rq29.peg.1722_210442
334	group_11800	transcriptional regulator AraC family	30	30	1	312	26525				239	824	782	re01.peg.6694_6693	re02.peg.5404_12585	re03.peg.2142_16368	re05.peg.1579_30042	re06.peg.2541_37568	re07.peg.3075_45288	re08.peg.5777_54162	re09.peg.2333_57215	re14.peg.4224_100053	re15.peg.6231_108882	re17.peg.3528_122434	re18.peg.2307_128143	re19.peg.4169_136715	re20.peg.570_139344	re22.peg.4946_157738	re04.peg.2909_24214	re10.peg.5255_66830	re11.peg.4176_74900	re12.peg.6225_85711	re13.peg.3171_91803	re16.peg.2335_114269	re21.peg.6367_152443	rq23.peg.4509_171088	rq24.peg.3654_176992	rq25.peg.154_179950	rq26.peg.2076_188600	rq27.peg.5756_199560	rq28.peg.1505_201731	re30.peg.3104_162773	rq29.peg.1730_210450
335	group_11802	Aldoxime dehydratase	30	30	1	312	31250				308	1061	1035	re01.peg.6704_6703	re02.peg.1837_9018	re03.peg.3427_17653	re05.peg.6116_34579	re06.peg.5822_40848	re07.peg.5896_48109	re08.peg.4598_52983	re09.peg.708_55590	re14.peg.5925_101754	re15.peg.8586_111237	re17.peg.5922_124828	re18.peg.6080_131915	re19.peg.5834_138380	re20.peg.2203_140977	re22.peg.6555_159347	re04.peg.5949_27254	re10.peg.4902_66477	re11.peg.7084_77808	re12.peg.3180_82666	re13.peg.2773_91405	re16.peg.4006_115940	re21.peg.6119_152195	rq23.peg.6258_172837	rq24.peg.3519_176857	rq25.peg.4464_184260	rq26.peg.6097_192621	rq27.peg.2019_195823	rq28.peg.5647_205872	re30.peg.4862_164531	rq29.peg.5644_214364
336	group_11804	Glutamine ABC transporter substrate binding and permease protein	30	30	1	312	31239				1508	1817	1793	re01.peg.6712_6711	re02.peg.1829_9010	re03.peg.3419_17645	re05.peg.6124_34587	re06.peg.5814_40840	re07.peg.5904_48117	re08.peg.4590_52975	re09.peg.700_55582	re14.peg.5933_101762	re15.peg.8594_111245	re17.peg.5930_124836	re18.peg.6072_131907	re19.peg.5842_138388	re20.peg.2211_140985	re22.peg.6563_159355	re04.peg.5957_27262	re10.peg.4910_66485	re11.peg.7074_77798	re12.peg.3172_82658	re13.peg.2765_91397	re16.peg.4014_115948	re21.peg.6112_152188	rq23.peg.6266_172845	rq24.peg.3511_176849	rq25.peg.4457_184253	rq26.peg.6104_192628	rq27.peg.2011_195815	rq28.peg.5639_205864	re30.peg.4869_164538	rq29.peg.5652_214372
337	group_11807	putative integral membrane protein	30	47	1.57	312	31220				752	1724	863	re01.peg.6718_6717 re01.peg.6719_6718	re02.peg.1823_9004	re03.peg.3413_17639	re05.peg.6130_34593	re06.peg.5808_40834 re06.peg.5807_40833	re07.peg.5910_48123 re07.peg.5911_48124	re08.peg.4584_52969 re08.peg.4583_52968	re09.peg.694_55576 re09.peg.693_55575	re14.peg.5940_101769	re15.peg.8602_111253 re15.peg.8603_111254	re17.peg.5936_124842 re17.peg.5937_124843	re18.peg.6066_131901	re19.peg.5848_138394	re20.peg.2217_140991	re22.peg.6597_159389 re22.peg.6598_159390	re04.peg.5963_27268 re04.peg.5964_27269	re10.peg.4917_66492 re10.peg.4918_66493	re11.peg.8286_79010 re11.peg.8287_79011	re12.peg.3164_82650 re12.peg.3163_82649	re13.peg.2759_91391 re13.peg.2758_91390	re16.peg.4020_115954 re16.peg.4021_115955	re21.peg.6106_152182 re21.peg.6105_152181	rq23.peg.6272_172851	rq24.peg.3505_176843	rq25.peg.4451_184247	rq26.peg.6110_192634	rq27.peg.2005_195809	rq28.peg.5632_205857	re30.peg.4875_164544 re30.peg.4876_164545	rq29.peg.5658_214378 rq29.peg.5659_214379
338	group_11817	Hydroxyacylglutathione hydrolase	30	30	1	312	24947				368	698	670	re01.peg.6749_6748	re02.peg.5998_13179	re03.peg.4283_18509	re05.peg.4407_32870	re06.peg.5663_40690	re07.peg.3439_45652	re08.peg.2076_50461	re09.peg.3752_58634	re14.peg.2814_98643	re15.peg.4186_106837	re17.peg.4563_123469	re18.peg.2839_128674	re19.peg.2753_135299	re20.peg.4830_143604	re22.peg.3469_156261	re04.peg.6276_27581	re10.peg.5475_67050	re11.peg.5658_76382	re12.peg.5199_84685	re13.peg.1028_89660	re16.peg.5961_117895	re21.peg.3569_149645	rq23.peg.3010_169589	rq24.peg.2174_175512	rq25.peg.3871_183667	rq26.peg.5735_192259	rq27.peg.4746_198550	rq28.peg.310_200537	re30.peg.1521_161190	rq29.peg.4162_212882
339	group_11820	diguanylate cyclase/phosphodiesterase (GGDEF & EAL domains) with PAS/PAC sensor(s)	30	30	1	312	29646				527	1181	1110	re01.peg.6908_6907	re02.peg.3076_10257	re03.peg.3992_18218	re05.peg.306_28769	re06.peg.1083_36111	re07.peg.372_42585	re08.peg.197_48582	re09.peg.1122_56004	re14.peg.5507_101336	re15.peg.7980_110631	re17.peg.3145_122051	re18.peg.73_125909	re19.peg.5426_137972	re20.peg.1817_140591	re22.peg.6187_158979	re04.peg.6335_27640	re10.peg.1727_63302	re11.peg.1025_71749	re12.peg.8495_87981	re13.peg.1216_89848	re16.peg.819_112753	re21.peg.3385_149461	rq23.peg.5849_172428	rq24.peg.737_174075	rq25.peg.1322_181118	rq26.peg.4791_191315	rq27.peg.2452_196256	rq28.peg.2148_202374	re30.peg.4299_163968	rq29.peg.2662_211382
340	group_11821	Manganese ABC transporter inner membrane permease protein SitD	30	30	1	312	31181				818	908	883	re01.peg.6933_6932	re02.peg.1808_8989	re03.peg.3067_17293	re05.peg.3818_32281	6666666.340933.peg.313_35341	re07.peg.4163_46376	re08.peg.2902_51287	re09.peg.678_55560	re14.peg.5955_101784	re15.peg.8627_111278	re17.peg.5587_124493	re18.peg.2043_127879	re19.peg.5863_138409	re20.peg.2232_141006	re22.peg.6613_159405	re04.peg.5866_27171	re10.peg.5916_67491	re11.peg.5273_75997	re12.peg.5006_84492	re13.peg.6674_95306	re16.peg.1233_113167	re21.peg.2732_148808	rq23.peg.6286_172865	rq24.peg.3490_176828	rq25.peg.2006_181802	rq26.peg.6700_193224	rq27.peg.1989_195793	rq28.peg.5616_205841	re30.peg.4891_164560	rq29.peg.1775_210495
341	group_11822	Manganese ABC transporter ATP-binding protein SitB	30	30	1	312	31180				536	731	724	re01.peg.6934_6933	re02.peg.1807_8988	re03.peg.3068_17294	re05.peg.3819_32282	6666666.340933.peg.314_35342	re07.peg.4162_46375	re08.peg.2901_51286	re09.peg.677_55559	re14.peg.5956_101785	re15.peg.8628_111279	re17.peg.5588_124494	re18.peg.2044_127880	re19.peg.5864_138410	re20.peg.2233_141007	re22.peg.6614_159406	re04.peg.5867_27172	re10.peg.5917_67492	re11.peg.5274_75998	re12.peg.5005_84491	re13.peg.6675_95307	re16.peg.1234_113168	re21.peg.2733_148809	rq23.peg.6287_172866	rq24.peg.3489_176827	rq25.peg.2005_181801	rq26.peg.6699_193223	rq27.peg.1988_195792	rq28.peg.5615_205840	re30.peg.4892_164561	rq29.peg.1776_210496
342	group_11826	2-aminomuconate semialdehyde dehydrogenase	30	30	1	312	6494				1076	1475	1432	re01.peg.6986_6985	re02.peg.1182_8363	re03.peg.3292_17518	re05.peg.3140_31603	re06.peg.3555_38582	re07.peg.5209_47422	re08.peg.4167_52552	re09.peg.140_55022	re14.peg.501_96330	re15.peg.748_103399	re17.peg.2328_121234	re18.peg.5586_131421	re19.peg.461_133007	re20.peg.2781_141555	re22.peg.913_153705	re04.peg.5115_26420	re10.peg.1347_62922	re11.peg.3871_74595	re12.peg.7483_86969	re13.peg.2498_91130	re16.peg.910_112844	re21.peg.3732_149808	rq23.peg.544_167123	rq24.peg.5124_178462	rq25.peg.4734_184530	rq26.peg.439_186963	rq27.peg.1400_195204	rq28.peg.3975_204201	re30.peg.549_160218	rq29.peg.3822_212542
343	group_11830	FIG00998089: hypothetical protein	30	30	1	312	4257				248	584	560	re01.peg.2671_2671	re02.peg.1_7182	re03.peg.1639_15865	re05.peg.3583_32046	6666666.340933.peg.148_35176	re07.peg.2522_44735	re08.peg.4343_52728	re09.peg.4929_59811	re14.peg.1632_97461	re15.peg.2456_105107	re17.peg.1972_120878	re18.peg.4774_130609	re19.peg.1577_134123	re20.peg.246_139020	re22.peg.2094_154886	re04.peg.831_22136	re10.peg.7472_69047	re11.peg.6513_77237	re12.peg.3047_82533	re13.peg.130_88762	re16.peg.5427_117361	re21.peg.1858_147934	rq23.peg.1683_168262	rq24.peg.4301_177639	rq25.peg.2500_182296	rq26.peg.2635_189159	rq27.peg.252_194056	rq28.peg.4554_204780	re30.peg.5925_165594	rq29.peg.5740_214460
344	group_11852	Conserved hypothetical integral membrane protein YrbE1B	30	30	1	312	16654				365	854	824	re01.peg.3296_3296	re02.peg.967_8148	re03.peg.6266_20492	re05.peg.2923_31386	re06.peg.3322_38349	re07.peg.4641_46854	re08.peg.4775_53160	re09.peg.5818_60700	re14.peg.722_96551	re15.peg.1114_103765	re17.peg.408_119314	re18.peg.1405_127241	re19.peg.676_133222	re20.peg.3034_141808	re22.peg.1132_153924	re04.peg.409_21714	re10.peg.4391_65966	re11.peg.437_71161	re12.peg.1856_81342	re13.peg.1938_90570	re16.peg.5229_117163	re21.peg.5611_151687	rq23.peg.773_167352	rq24.peg.208_173546	rq25.peg.3303_183099	rq26.peg.5049_191573	rq27.peg.1160_194964	rq28.peg.4985_205211	re30.peg.5015_164684	rq29.peg.578_209298
345	group_11853	Integral membrane protein	30	30	1	312	17324				971	1124	1111	re01.peg.3170_3170	re02.peg.1065_8246	re03.peg.4826_19052	re05.peg.3024_31487	re06.peg.6855_41881	re07.peg.5632_47845	re08.peg.5377_53762	re09.peg.17_54899	re14.peg.627_96456	re15.peg.917_103568	re17.peg.506_119412	re18.peg.4520_130355	re19.peg.574_133120	re20.peg.2920_141694	re22.peg.1040_153832	re04.peg.520_21825	re10.peg.5097_66672	re11.peg.5210_75934	re12.peg.7346_86832	re13.peg.2051_90683	re16.peg.5897_117831	re21.peg.1458_147534	rq23.peg.682_167261	rq24.peg.121_173459	rq25.peg.3391_183187	rq26.peg.3335_189859	rq27.peg.1256_195060	rq28.peg.3786_204012	re30.peg.2804_162473	rq29.peg.669_209389
346	group_11860	hypothetical protein	30	30	1	312	6170				314	875	830	re01.peg.1490_1490	re02.peg.1358_8539	re03.peg.1054_15280	re05.peg.3340_31803	re06.peg.3721_38748	re07.peg.3801_46014	re08.peg.5543_53928	re09.peg.293_55175	re14.peg.324_96153	re15.peg.507_103158	re17.peg.2470_121376	re18.peg.2665_128501	re19.peg.319_132865	re20.peg.2619_141393	re22.peg.761_153553	re04.peg.3766_25071	re10.peg.3195_64770	re11.peg.3462_74186	re12.peg.2292_81778	re13.peg.5191_93823	re16.peg.1502_113436	re21.peg.4075_150151	rq23.peg.336_166915	rq24.peg.3067_176405	rq25.peg.1626_181422	rq26.peg.606_187130	rq27.peg.1566_195370	rq28.peg.1639_201865	re30.peg.380_160049	rq29.peg.3416_212136
347	group_11885	FIG00996707: hypothetical protein	30	30	1	312	28986				1397	1568	1534	re01.peg.4749_4749	re02.peg.2833_10014	re03.peg.2522_16748	re05.peg.529_28992	re06.peg.1620_36648	re07.peg.594_42807	re08.peg.424_48809	re09.peg.1348_56230	re14.peg.5294_101123	re15.peg.7643_110294	re17.peg.3949_122855	re18.peg.304_126140	re19.peg.5196_137742	re20.peg.1592_140366	re22.peg.5973_158765	re04.peg.2594_23899	re10.peg.337_61912	re11.peg.1679_72403	re12.peg.1683_81169	re13.peg.5746_94378	re16.peg.1137_113071	re21.peg.864_146940	rq23.peg.5566_172145	rq24.peg.965_174303	rq25.peg.1106_180902	rq26.peg.1442_187966	rq27.peg.2676_196480	rq28.peg.7099_207324	re30.peg.4080_163749	rq29.peg.2093_210813
348	group_11941	Porphobilinogen synthase	30	30	1	312	4175				875	1037	908	re01.peg.2622_2622	re02.peg.4456_11637	re03.peg.1589_15815	re05.peg.3634_32097	6666666.340933.peg.199_35227	re07.peg.2572_44785	re08.peg.4294_52679	re09.peg.4878_59760	re14.peg.1681_97510	re15.peg.2522_105173	re17.peg.1923_120829	re18.peg.4824_130659	re19.peg.1626_134172	re20.peg.196_138970	re22.peg.2148_154940	re04.peg.783_22088	re10.peg.7512_69087	re11.peg.6010_76734	re12.peg.7249_86735	re13.peg.179_88811	re16.peg.5475_117409	re21.peg.2336_148412	rq23.peg.1732_168311	rq24.peg.4645_177983	rq25.peg.2550_182346	rq26.peg.2586_189110	rq27.peg.203_194007	rq28.peg.4498_204724	re30.peg.5973_165642	rq29.peg.5693_214413
349	group_11965	Glycerol-3-phosphate dehydrogenase	30	30	1	312	24646				743	1556	1515	re01.peg.2913_2913	re02.peg.5197_12378	re03.peg.5737_19963	re05.peg.5243_33706	re06.peg.1740_36768	re07.peg.2084_44297	re08.peg.1924_50309	re09.peg.3906_58788	re14.peg.2662_98491	re15.peg.3977_106628	re17.peg.2064_120970	re18.peg.4226_130061	re19.peg.2601_135147	re20.peg.4681_143455	re22.peg.3274_156066	re04.peg.1305_22610	re10.peg.1700_63275	re11.peg.7056_77780	re12.peg.3646_83132	re13.peg.5115_93747	re16.peg.4048_115982	re21.peg.2436_148512	rq23.peg.2863_169442	rq24.peg.2320_175658	rq25.peg.3724_183520	rq26.peg.6359_192883	rq27.peg.4941_198745	rq28.peg.3660_203886	re30.peg.1377_161046	rq29.peg.5573_214293
350	group_11981	NADH:flavin oxidoreductases Old Yellow Enzyme family	30	30	1	312	19469				572	1103	1077	re01.peg.1715_1715	re02.peg.5617_12798	re03.peg.5169_19395	re05.peg.4877_33340	re06.peg.5406_40433	re07.peg.4239_46452	re08.peg.4017_52402	re09.peg.2910_57792	re14.peg.3633_99462	re15.peg.5369_108020	re17.peg.4167_123073	re18.peg.3790_129625	re19.peg.3574_136120	re20.peg.5718_144492	re22.peg.4348_157140	re04.peg.1005_22310	re10.peg.2565_64140	re11.peg.1404_72128	re12.peg.6769_86255	re13.peg.4098_92730	re16.peg.3590_115524	re21.peg.4689_150765	rq23.peg.3830_170409	rq24.peg.4891_178229	rq25.peg.5153_184949	rq26.peg.4095_190619	rq27.peg.4201_198005	rq28.peg.5335_205560	re30.peg.2417_162086	rq29.peg.2902_211622
351	group_11983	Argininosuccinate lyase	30	30	1	312	20611				1097	1508	1428	re01.peg.6367_6366	re02.peg.5645_12826	re03.peg.3143_17369	re05.peg.5606_34069	re06.peg.6664_41690	re07.peg.5356_47569	re08.peg.4572_52957	re09.peg.3394_58276	re14.peg.3165_98994	re15.peg.4702_107353	re17.peg.4358_123264	re18.peg.5108_130943	re19.peg.3101_135647	re20.peg.5178_143952	re22.peg.3819_156611	re04.peg.6369_27674	re10.peg.3975_65550	re11.peg.2988_73712	re12.peg.2392_81878	re13.peg.3628_92260	re16.peg.3899_115833	re21.peg.4308_150384	rq23.peg.3360_169939	rq24.peg.5994_179332	rq25.peg.6283_186079	rq26.peg.6398_192922	rq27.peg.3693_197497	rq28.peg.7050_207275	re30.peg.1872_161541	rq29.peg.6408_215128
352	group_11987	putative phosphinothricin N-acetyltransferase	30	30	1	312	20373				377	836	799	re01.peg.6357_6356	re02.peg.5755_12936	re03.peg.3241_17467	re05.peg.5708_34171	re06.peg.5989_41015	re07.peg.5259_47472	re08.peg.4472_52857	re09.peg.3297_58179	re14.peg.3264_99093	re15.peg.4830_107481	re17.peg.4455_123361	re18.peg.5005_130840	re19.peg.3199_135745	re20.peg.5277_144051	re22.peg.3932_156724	re04.peg.4896_26201	re10.peg.7899_69474	re11.peg.5858_76582	re12.peg.7679_87165	re13.peg.6046_94678	re16.peg.3799_115733	re21.peg.4202_150278	rq23.peg.3458_170037	rq24.peg.6092_179430	rq25.peg.6186_185982	rq26.peg.3170_189694	rq27.peg.3802_197606	rq28.peg.4286_204512	re30.peg.1984_161653	rq29.peg.1554_210274
353	group_11999	Urease accessory protein UreG	30	30	1	312	27604				323	749	701	re01.peg.367_367	re02.peg.6647_13828	re03.peg.741_14967	re05.peg.1103_29566	re06.peg.3215_38242	re07.peg.1112_43325	re08.peg.977_49362	re09.peg.1879_56761	re14.peg.4751_100580	re15.peg.6890_109541	re17.peg.1361_120267	re18.peg.872_126708	re19.peg.4632_137178	re20.peg.1023_139797	re22.peg.5401_158193	re04.peg.3367_24672	re10.peg.325_61900	re11.peg.2045_72769	re12.peg.639_80125	re13.peg.4579_93211	re16.peg.4888_116822	re21.peg.317_146393	rq23.peg.5024_171603	rq24.peg.1514_174852	rq25.peg.596_180392	rq26.peg.111_186635	rq27.peg.3270_197074	rq28.peg.3201_203427	re30.peg.3560_163229	rq29.peg.4729_213449
354	group_12208	FIG00820146: hypothetical protein	30	30	1	312	23269				251	527	483	re01.peg.896_896	re02.peg.2228_9409	re03.peg.5381_19607	re05.peg.2101_30564	re06.peg.6285_41311	re07.peg.1599_43812	re08.peg.2409_50794	re09.peg.4359_59241	re14.peg.2202_98031	re15.peg.3253_105904	re17.peg.842_119748	re18.peg.2009_127845	re19.peg.2147_134693	re20.peg.4203_142977	re22.peg.2693_155485	re04.peg.3591_24896	re10.peg.7762_69337	re11.peg.7532_78256	re12.peg.7219_86705	re13.peg.5430_94062	re16.peg.3393_115327	re21.peg.1015_147091	rq23.peg.2287_168866	rq24.peg.2760_176098	rq25.peg.4220_184016	rq26.peg.4589_191113	rq27.peg.5393_199197	rq28.peg.3045_203271	re30.peg.923_160592	rq29.peg.3055_211775
355	group_12209	Polyphosphate kinase	30	30	1	312	23874				1661	2261	2200	re01.peg.1079_1079	re02.peg.2433_9614	re03.peg.4450_18676	re05.peg.2301_30764	re06.peg.6470_41496	re07.peg.1786_43999	re08.peg.2596_50981	re09.peg.4176_59058	re14.peg.2384_98213	re15.peg.3516_106167	re17.peg.1667_120573	re18.peg.3175_129010	re19.peg.2332_134878	re20.peg.4387_143161	re22.peg.2936_155728	re04.peg.5796_27101	re10.peg.2943_64518	re11.peg.6731_77455	re12.peg.5592_85078	re13.peg.4840_93472	re16.peg.4318_116252	re21.peg.2923_148999	rq23.peg.2596_169175	rq24.peg.2590_175928	rq25.peg.4406_184202	rq26.peg.1123_187647	rq27.peg.5210_199014	rq28.peg.6881_207106	re30.peg.1111_160780	rq29.peg.1939_210659
356	group_12258	ABC Fe(3+) transporter substrate binding component	30	30	1	312	15843				587	1037	1012	re01.peg.3988_3988	re02.peg.662_7843	re03.peg.6593_20819	re05.peg.2639_31102	re06.peg.4631_39658	re07.peg.4898_47111	re08.peg.1597_49982	re09.peg.5538_60420	re14.peg.1006_96835	re15.peg.1659_104310	re17.peg.123_119029	re18.peg.3291_129126	re19.peg.959_133505	re20.peg.3328_142102	re22.peg.1498_154290	re04.peg.130_21435	re10.peg.2402_63977	re11.peg.1289_72013	re12.peg.1955_81441	re13.peg.1657_90289	re16.peg.6538_118472	re21.peg.5891_151967	rq23.peg.1053_167632	rq24.peg.5329_178667	rq25.peg.3026_182822	rq26.peg.2328_188852	rq27.peg.877_194681	rq28.peg.725_200951	re30.peg.5293_164962	rq29.peg.5064_213784
357	group_12261	possible porin protein	30	30	1	312	5936				446	710	662	re01.peg.1417_1417	re02.peg.1441_8622	re03.peg.983_15209	re05.peg.3420_31883	re06.peg.3803_38830	re07.peg.3875_46088	re08.peg.5131_53516	re09.peg.379_55261	re14.peg.239_96068	re15.peg.378_103029	re17.peg.2570_121476	re18.peg.2592_128428	re19.peg.240_132786	re20.peg.2536_141310	re22.peg.663_153455	re04.peg.5450_26755	re10.peg.3290_64865	re11.peg.2004_72728	re12.peg.2195_81681	re13.peg.6973_95605	re16.peg.1422_113356	re21.peg.4144_150220	rq23.peg.248_166827	rq24.peg.3158_176496	rq25.peg.1711_181507	rq26.peg.706_187230	rq27.peg.1658_195462	rq28.peg.1771_201997	re30.peg.280_159949	rq29.peg.3511_212231
358	group_1231	hypothetical protein	30	30	1	312	16124				200	689	619	re01.peg.3415_3415	re02.peg.825_8006	re03.peg.6440_20666	re05.peg.2795_31258	re06.peg.3452_38479	re07.peg.4779_46992	re08.peg.1750_50135	re09.peg.5689_60571	re14.peg.852_96681	re15.peg.1436_104087	re17.peg.278_119184	re18.peg.1551_127387	re19.peg.805_133351	re20.peg.3172_141946	re22.peg.1344_154136	re04.peg.281_21586	re10.peg.1028_62603	re11.peg.2863_73587	re12.peg.513_79999	re13.peg.1809_90441	re16.peg.2694_114628	re21.peg.5737_151813	rq23.peg.901_167480	rq24.peg.5178_178516	rq25.peg.3177_182973	rq26.peg.5176_191700	rq27.peg.1028_194832	rq28.peg.914_201140	re30.peg.5141_164810	rq29.peg.4913_213633
359	group_12311	NADPH-dependent mycothiol reductase Mtr	30	30	1	312	24259				902	1382	1350	re01.peg.3061_3061	re02.peg.2580_9761	re03.peg.5584_19810	re05.peg.2422_30885	re06.peg.6601_41627	re07.peg.1935_44148	re08.peg.5207_53592	re09.peg.4054_58936	re14.peg.2505_98334	re15.peg.3746_106397	re17.peg.2214_121120	re18.peg.3050_128885	re19.peg.2454_135000	re20.peg.4505_143279	re22.peg.3122_155914	re04.peg.1458_22763	re10.peg.1927_63502	re11.peg.6668_77392	re12.peg.8480_87966	re13.peg.4966_93598	re16.peg.4191_116125	re21.peg.3040_149116	rq23.peg.2714_169293	rq24.peg.2472_175810	rq25.peg.3575_183371	rq26.peg.1005_187529	rq27.peg.5091_198895	rq28.peg.7002_207227	re30.peg.1231_160900	rq29.peg.5423_214143
360	group_1232	ABC-type multidrug transport system ATPase component	30	30	1	312	26543				368	1037	958	re01.peg.3473_3473	re02.peg.5413_12594	re03.peg.2134_16360	re05.peg.1572_30035	re06.peg.2548_37575	re07.peg.3083_45296	re08.peg.5770_54155	re09.peg.2326_57208	re14.peg.4231_100060	re15.peg.6243_108894	re17.peg.3537_122443	re18.peg.1333_127169	re19.peg.4176_136722	re20.peg.578_139352	re22.peg.4953_157745	re04.peg.3288_24593	re10.peg.5242_66817	re11.peg.4165_74889	re12.peg.6302_85788	re13.peg.6408_95040	re16.peg.2342_114276	re21.peg.6359_152435	rq23.peg.4516_171095	rq24.peg.3663_177001	rq25.peg.160_179956	rq26.peg.2069_188593	rq27.peg.5749_199553	rq28.peg.1824_202050	re30.peg.3111_162780	rq29.peg.1737_210457
361	group_12321	FIG00994730: hypothetical protein	30	30	1	312	27634				254	1043	1012	re01.peg.349_349	re02.peg.6667_13848	re03.peg.724_14950	re05.peg.1085_29548	re06.peg.3233_38260	re07.peg.1094_43307	re08.peg.959_49344	re09.peg.1861_56743	re14.peg.4768_100597	re15.peg.6911_109562	re17.peg.1343_120249	re18.peg.855_126691	re19.peg.4650_137196	re20.peg.1041_139815	re22.peg.5419_158211	re04.peg.3349_24654	re10.peg.303_61878	re11.peg.2066_72790	re12.peg.662_80148	re13.peg.4597_93229	re16.peg.4906_116840	re21.peg.335_146411	rq23.peg.5042_171621	rq24.peg.1496_174834	rq25.peg.614_180410	rq26.peg.129_186653	rq27.peg.3252_197056	rq28.peg.3220_203446	re30.peg.3578_163247	rq29.peg.4711_213431
362	group_12352	CAIB/BAIF family protein	30	30	1	312	28351				959	1142	1135	re01.peg.47_47	re02.peg.3282_10463	re03.peg.866_15092	re05.peg.781_29244	re06.peg.4795_39822	re07.peg.816_43029	re08.peg.661_49046	re09.peg.1574_56456	re14.peg.5071_100900	re15.peg.7329_109980	re17.peg.4821_123727	re18.peg.574_126410	re19.peg.4956_137502	re20.peg.1329_140103	re22.peg.5736_158528	re04.peg.2465_23770	re10.peg.2728_64303	re11.peg.595_71319	re12.peg.3483_82969	re13.peg.3957_92589	re16.peg.1982_113916	re21.peg.619_146695	rq23.peg.5321_171900	rq24.peg.1218_174556	rq25.peg.882_180678	rq26.peg.2821_189345	rq27.peg.2990_196794	rq28.peg.6091_206316	re30.peg.3861_163530	rq29.peg.4001_212721
363	group_12355	Transcriptional regulator ArsR family	30	30	1	312	28321				359	359	359	re01.peg.63_63	re02.peg.3301_10482	re03.peg.882_15108	re05.peg.797_29260	re06.peg.4811_39838	re07.peg.832_43045	re08.peg.677_49062	re09.peg.1591_56473	re14.peg.5055_100884	re15.peg.7310_109961	re17.peg.4838_123744	re18.peg.591_126427	re19.peg.4940_137486	re20.peg.1312_140086	re22.peg.5719_158511	re04.peg.2449_23754	re10.peg.2746_64321	re11.peg.577_71301	re12.peg.3502_82988	re13.peg.3974_92606	re16.peg.1966_113900	re21.peg.602_146678	rq23.peg.5304_171883	rq24.peg.1234_174572	rq25.peg.867_180663	rq26.peg.2838_189362	rq27.peg.3007_196811	rq28.peg.6071_206296	re30.peg.3844_163513	rq29.peg.3983_212703
364	group_12362	Methionine ABC transporter substrate-binding protein	30	30	1	312	28228				476	950	847	re01.peg.93_93	re02.peg.3334_10515	re03.peg.912_15138	re05.peg.827_29290	re06.peg.4843_39870	re07.peg.863_43076	re08.peg.707_49092	re09.peg.1620_56502	re14.peg.5024_100853	re15.peg.7265_109916	re17.peg.4868_123774	re18.peg.621_126457	re19.peg.4907_137453	re20.peg.1280_140054	re22.peg.5687_158479	re04.peg.2418_23723	re10.peg.2800_64375	re11.peg.1788_72512	re12.peg.1092_80578	re13.peg.4005_92637	re16.peg.1934_113868	re21.peg.570_146646	rq23.peg.5274_171853	rq24.peg.1264_174602	rq25.peg.835_180631	rq26.peg.2884_189408	rq27.peg.3037_196841	rq28.peg.6035_206260	re30.peg.3799_163468	rq29.peg.3953_212673
365	group_12364	FIG01000915: hypothetical protein	30	30	1	312	28222				428	428	428	re01.peg.98_98	re02.peg.3339_10520	re03.peg.917_15143	re05.peg.832_29295	re06.peg.4848_39875	re07.peg.868_43081	re08.peg.712_49097	re09.peg.1625_56507	re14.peg.5019_100848	re15.peg.7258_109909	re17.peg.4873_123779	re18.peg.626_126462	re19.peg.4902_137448	re20.peg.1275_140049	re22.peg.5682_158474	re04.peg.2413_23718	re10.peg.2806_64381	re11.peg.1793_72517	re12.peg.1099_80585	re13.peg.4010_92642	re16.peg.1929_113863	re21.peg.565_146641	rq23.peg.5269_171848	rq24.peg.1269_174607	rq25.peg.830_180626	rq26.peg.2889_189413	rq27.peg.3042_196846	rq28.peg.6030_206255	re30.peg.3794_163463	rq29.peg.3948_212668
366	group_12367	FIG00998922: hypothetical protein	30	30	1	312	28217				257	776	741	re01.peg.101_101	re02.peg.3342_10523	re03.peg.920_15146	re05.peg.835_29298	re06.peg.4851_39878	re07.peg.871_43084	re08.peg.715_49100	re09.peg.1628_56510	re14.peg.5016_100845	re15.peg.7253_109904	re17.peg.4876_123782	re18.peg.629_126465	re19.peg.4899_137445	re20.peg.1272_140046	re22.peg.5679_158471	re04.peg.2410_23715	re10.peg.2809_64384	re11.peg.1797_72521	re12.peg.1103_80589	re13.peg.4013_92645	re16.peg.1926_113860	re21.peg.562_146638	rq23.peg.5266_171845	rq24.peg.1272_174610	rq25.peg.827_180623	rq26.peg.2892_189416	rq27.peg.3045_196849	rq28.peg.6027_206252	re30.peg.3791_163460	rq29.peg.3945_212665
367	group_12370	hypothetical protein	30	30	1	312	28173				227	326	314	re01.peg.128_128	re02.peg.3368_10549	re03.peg.945_15171	re05.peg.860_29323	re06.peg.4877_39904	re07.peg.897_43110	re08.peg.739_49124	re09.peg.1655_56537	re14.peg.4992_100821	re15.peg.7220_109871	re17.peg.4902_123808	re18.peg.655_126491	re19.peg.4874_137420	re20.peg.1247_140021	re22.peg.5654_158446	re04.peg.2384_23689	re10.peg.9_61584	re11.peg.1829_72553	re12.peg.1138_80624	re13.peg.4040_92672	re16.peg.1900_113834	re21.peg.536_146612	rq23.peg.5240_171819	rq24.peg.1298_174636	rq25.peg.801_180597	rq26.peg.2917_189441	rq27.peg.3071_196875	rq28.peg.5997_206222	re30.peg.3765_163434	rq29.peg.3920_212640
368	group_12376	transcriptional regulator LuxR family	30	30	1	312	28081				791	866	861	re01.peg.164_164	re02.peg.3409_10590	re03.peg.534_14760	re05.peg.896_29359	re06.peg.4914_39941	re07.peg.935_43148	re08.peg.776_49161	re09.peg.1693_56575	re14.peg.4954_100783	re15.peg.7168_109819	re17.peg.1192_120098	re18.peg.694_126530	re19.peg.4834_137380	re20.peg.1212_139986	re22.peg.5608_158400	re04.peg.2349_23654	re10.peg.68_61643	re11.peg.1868_72592	re12.peg.1203_80689	re13.peg.4741_93373	re16.peg.6665_118599	re21.peg.503_146579	rq23.peg.5191_171770	rq24.peg.1345_174683	rq25.peg.767_180563	rq26.peg.285_186809	rq27.peg.3106_196910	rq28.peg.6241_206466	re30.peg.3730_163399	rq29.peg.3196_211916
369	group_12378	O-succinylbenzoate synthase	30	30	1	312	28044				518	1133	1095	re01.peg.186_186	re02.peg.3414_10595	re03.peg.543_14769	re05.peg.905_29368	re06.peg.4919_39946	re07.peg.940_43153	re08.peg.785_49170	re09.peg.1704_56586	re14.peg.4945_100774	re15.peg.7152_109803	re17.peg.1195_120101	re18.peg.699_126535	re19.peg.4829_137375	re20.peg.1207_139981	re22.peg.5597_158389	re04.peg.2346_23651	re10.peg.72_61647	re11.peg.1872_72596	re12.peg.1206_80692	re13.peg.4738_93370	re16.peg.6662_118596	re21.peg.500_146576	rq23.peg.5188_171767	rq24.peg.1348_174686	rq25.peg.764_180560	rq26.peg.282_186806	rq27.peg.3109_196913	rq28.peg.6238_206463	re30.peg.3727_163396	rq29.peg.3199_211919
370	group_12382	ErfK/YbiS/YcfS/YnhG family protein	30	30	1	312	27979				374	923	897	re01.peg.207_207	re02.peg.3441_10622	re03.peg.565_14791	re05.peg.928_29391	re06.peg.4940_39967	re07.peg.961_43174	re08.peg.806_49191	re09.peg.1725_56607	re14.peg.4924_100753	re15.peg.7118_109769	re17.peg.1217_120123	re18.peg.722_126558	re19.peg.4807_137353	re20.peg.1185_139959	re22.peg.5575_158367	re04.peg.2325_23630	re10.peg.105_61680	re11.peg.1899_72623	re12.peg.875_80361	re13.peg.4717_93349	re16.peg.6641_118575	re21.peg.479_146555	rq23.peg.5167_171746	rq24.peg.1370_174708	rq25.peg.743_180539	rq26.peg.260_186784	rq27.peg.3130_196934	rq28.peg.6213_206438	re30.peg.3706_163375	rq29.peg.3220_211940
371	group_12385	FIG01001277: hypothetical protein	30	30	1	312	27942				488	488	488	re01.peg.228_228	re02.peg.3463_10644	re03.peg.586_14812	re05.peg.949_29412	re06.peg.4961_39988	re07.peg.982_43195	re08.peg.827_49212	re09.peg.1746_56628	re14.peg.4903_100732	re15.peg.7086_109737	re17.peg.1239_120145	re18.peg.743_126579	re19.peg.4786_137332	re20.peg.1163_139937	re22.peg.5554_158346	re04.peg.2303_23608	re10.peg.131_61706	re11.peg.6166_76890	re12.peg.847_80333	re13.peg.4696_93328	re16.peg.6619_118553	re21.peg.457_146533	rq23.peg.5145_171724	rq24.peg.1392_174730	rq25.peg.722_180518	rq26.peg.238_186762	rq27.peg.3152_196956	rq28.peg.7687_207912	re30.peg.3685_163354	rq29.peg.3242_211962
372	group_12391	Glycine betaine/carnitine/choline ABC transporter permease protein	30	30	1	312	27799				602	788	692	re01.peg.272_272	re02.peg.3511_10692	re03.peg.633_14859	re05.peg.993_29456	re06.peg.5007_40034	re07.peg.1005_43218	re08.peg.870_49255	re09.peg.1770_56652	re14.peg.4858_100687	re15.peg.7021_109672	re17.peg.1264_120170	re18.peg.772_126608	re19.peg.4740_137286	re20.peg.1118_139892	re22.peg.5509_158301	re04.peg.6241_27546	re10.peg.198_61773	re11.peg.2162_72886	re12.peg.776_80262	re13.peg.4670_93302	re16.peg.6588_118522	re21.peg.412_146488	rq23.peg.5118_171697	rq24.peg.1420_174758	rq25.peg.692_180488	rq26.peg.208_186732	rq27.peg.3178_196982	rq28.peg.3314_203540	re30.peg.3655_163324	rq29.peg.3268_211988
373	group_12392	YbbM seven transmembrane helix protein	30	30	1	312	27777				731	770	768	re01.peg.282_282	re02.peg.3536_10717	re03.peg.656_14882	re05.peg.1018_29481	re06.peg.5030_40057	re07.peg.1028_43241	re08.peg.893_49278	re09.peg.1794_56676	re14.peg.4835_100664	re15.peg.6993_109644	re17.peg.1276_120182	re18.peg.784_126620	re19.peg.4717_137263	re20.peg.1108_139882	re22.peg.5486_158278	re04.peg.6229_27534	re10.peg.215_61790	re11.peg.2146_72870	re12.peg.763_80249	re13.peg.4661_93293	re16.peg.6575_118509	re21.peg.402_146478	rq23.peg.5106_171685	rq24.peg.1432_174770	rq25.peg.681_180477	rq26.peg.195_186719	rq27.peg.3187_196991	rq28.peg.3300_203526	re30.peg.3643_163312	rq29.peg.3281_212001
374	group_12398	Thioredoxin	30	30	1	312	27626				473	476	475	re01.peg.354_354	re02.peg.6662_13843	re03.peg.729_14955	re05.peg.1090_29553	re06.peg.3228_38255	re07.peg.1099_43312	re08.peg.964_49349	re09.peg.1866_56748	re14.peg.4763_100592	re15.peg.6905_109556	re17.peg.1348_120254	re18.peg.860_126696	re19.peg.4645_137191	re20.peg.1036_139810	re22.peg.5414_158206	re04.peg.3354_24659	re10.peg.308_61883	re11.peg.2061_72785	re12.peg.657_80143	re13.peg.4592_93224	re16.peg.4901_116835	re21.peg.330_146406	rq23.peg.5037_171616	rq24.peg.1501_174839	rq25.peg.609_180405	rq26.peg.124_186648	rq27.peg.3257_197061	rq28.peg.3216_203442	re30.peg.3573_163242	rq29.peg.4716_213436
375	group_12400	tRNA dihydrouridine synthase B	30	30	1	312	27590				464	1142	1095	re01.peg.372_372	re02.peg.6641_13822	re03.peg.746_14972	re05.peg.1108_29571	re06.peg.3209_38236	re07.peg.1117_43330	re08.peg.982_49367	re09.peg.1884_56766	re14.peg.4744_100573	re15.peg.6882_109533	re17.peg.1366_120272	re18.peg.878_126714	re19.peg.4626_137172	re20.peg.1017_139791	re22.peg.5396_158188	re04.peg.3372_24677	re10.peg.8652_70227	re11.peg.8265_78989	re12.peg.8530_88016	re13.peg.4574_93206	re16.peg.4883_116817	re21.peg.312_146388	rq23.peg.5018_171597	rq24.peg.1519_174857	rq25.peg.590_180386	rq26.peg.105_186629	rq27.peg.3275_197079	rq28.peg.3196_203422	re30.peg.3555_163224	rq29.peg.4734_213454
376	group_12401	transcriptional regulator LysR family	30	30	1	312	27586				794	878	867	re01.peg.374_374	re02.peg.6639_13820	re03.peg.748_14974	re05.peg.1110_29573	re06.peg.3207_38234	re07.peg.1119_43332	re08.peg.984_49369	re09.peg.1886_56768	re14.peg.4742_100571	re15.peg.6879_109530	re17.peg.1368_120274	re18.peg.880_126716	re19.peg.4624_137170	re20.peg.1015_139789	re22.peg.5394_158186	re04.peg.3374_24679	re10.peg.8649_70224	re11.peg.8263_78987	re12.peg.8532_88018	re13.peg.4572_93204	re16.peg.4881_116815	re21.peg.310_146386	rq23.peg.5016_171595	rq24.peg.1521_174859	rq25.peg.588_180384	rq26.peg.103_186627	rq27.peg.3277_197081	rq28.peg.3194_203420	re30.peg.3553_163222	rq29.peg.4736_213456
377	group_12403	hypothetical protein	30	30	1	312	27578				446	446	446	re01.peg.377_377	re02.peg.6635_13816	re03.peg.751_14977	re05.peg.1112_29575	re06.peg.3204_38231	re07.peg.1122_43335	re08.peg.987_49372	re09.peg.1889_56771	re14.peg.4739_100568	re15.peg.6876_109527	re17.peg.1371_120277	re18.peg.883_126719	re19.peg.4621_137167	re20.peg.1012_139786	re22.peg.5391_158183	re04.peg.3377_24682	re10.peg.648_62223	re11.peg.7638_78362	re12.peg.3885_83371	re13.peg.4569_93201	re16.peg.4878_116812	re21.peg.307_146383	rq23.peg.5013_171592	rq24.peg.1524_174862	rq25.peg.584_180380	rq26.peg.100_186624	rq27.peg.3280_197084	rq28.peg.3191_203417	re30.peg.3550_163219	rq29.peg.4739_213459
378	group_12405	FIG01001474: hypothetical protein	30	30	1	312	27439				1130	1244	1240	re01.peg.404_404	re02.peg.6610_13791	re03.peg.777_15003	re05.peg.1138_29601	re06.peg.3177_38204	re07.peg.1148_43361	re08.peg.1013_49398	re09.peg.1915_56797	re14.peg.4644_100473	re15.peg.6832_109483	re17.peg.1395_120301	re18.peg.910_126746	re19.peg.4595_137141	re20.peg.986_139760	re22.peg.5365_158157	re04.peg.3405_24710	re10.peg.686_62261	re11.peg.6212_76936	re12.peg.3849_83335	re13.peg.4544_93176	re16.peg.4853_116787	re21.peg.281_146357	rq23.peg.4933_171512	rq24.peg.1550_174888	rq25.peg.558_180354	rq26.peg.74_186598	rq27.peg.3306_197110	rq28.peg.3163_203389	re30.peg.3524_163193	rq29.peg.4764_213484
379	group_12406	Transcriptional regulator GntR family	30	30	1	312	27416				704	803	734	re01.peg.413_413	re02.peg.3611_10792	re03.peg.786_15012	re05.peg.1147_29610	re06.peg.2949_37976	re07.peg.1158_43371	re08.peg.1022_49407	re09.peg.1924_56806	re14.peg.4635_100464	re15.peg.6822_109473	re17.peg.1408_120314	re18.peg.919_126755	re19.peg.4586_137132	re20.peg.977_139751	re22.peg.5356_158148	re04.peg.3418_24723	re10.peg.704_62279	re11.peg.6228_76952	re12.peg.3832_83318	re13.peg.4531_93163	re16.peg.4840_116774	re21.peg.268_146344	rq23.peg.4920_171499	rq24.peg.1563_174901	rq25.peg.545_180341	rq26.peg.61_186585	rq27.peg.3319_197123	rq28.peg.3147_203373	re30.peg.3511_163180	rq29.peg.4777_213497
380	group_12407	protein of unknown function DUF1211	30	30	1	312	27359				602	629	627	re01.peg.447_447	re02.peg.3641_10822	re03.peg.1746_15972	re05.peg.1180_29643	re06.peg.2923_37950	re07.peg.1186_43399	re08.peg.1054_49439	re09.peg.1953_56835	re14.peg.4605_100434	re15.peg.6771_109422	re17.peg.1432_120338	re18.peg.951_126787	re19.peg.4557_137103	re20.peg.950_139724	re22.peg.5330_158122	re04.peg.3445_24750	re10.peg.740_62315	re11.peg.2334_73058	re12.peg.2536_82022	re13.peg.4508_93140	re16.peg.4815_116749	re21.peg.241_146317	rq23.peg.4895_171474	rq24.peg.1588_174926	rq25.peg.521_180317	rq26.peg.1692_188216	rq27.peg.3343_197147	rq28.peg.2474_202700	re30.peg.3487_163156	rq29.peg.4577_213297
381	group_12408	hypothetical protein	30	30	1	312	27358				578	578	578	re01.peg.448_448	re02.peg.3642_10823	re03.peg.1747_15973	re05.peg.1181_29644	re06.peg.2922_37949	re07.peg.1187_43400	re08.peg.1055_49440	re09.peg.1954_56836	re14.peg.4604_100433	re15.peg.6770_109421	re17.peg.1433_120339	re18.peg.952_126788	re19.peg.4556_137102	re20.peg.949_139723	re22.peg.5329_158121	re04.peg.3446_24751	re10.peg.741_62316	re11.peg.2335_73059	re12.peg.2537_82023	re13.peg.4507_93139	re16.peg.4814_116748	re21.peg.240_146316	rq23.peg.4894_171473	rq24.peg.1589_174927	rq25.peg.520_180316	rq26.peg.1693_188217	rq27.peg.3344_197148	rq28.peg.2473_202699	re30.peg.3486_163155	rq29.peg.4576_213296
382	group_12410	probable leucine-responsive regulator	30	30	1	312	27214				389	440	429	re01.peg.504_504	re02.peg.3694_10875	re03.peg.1799_16025	re05.peg.1235_29698	re06.peg.2872_37899	re07.peg.1237_43450	re08.peg.1106_49491	re09.peg.2003_56885	re14.peg.4555_100384	re15.peg.6707_109358	re17.peg.1485_120391	re18.peg.1005_126841	re19.peg.4506_137052	re20.peg.897_139671	re22.peg.5280_158072	re04.peg.2939_24244	re10.peg.807_62382	re11.peg.2400_73124	re12.peg.2609_82095	re13.peg.4455_93087	re16.peg.4761_116695	re21.peg.187_146263	rq23.peg.4842_171421	rq24.peg.1643_174981	rq25.peg.467_180263	rq26.peg.1747_188271	rq27.peg.3397_197201	rq28.peg.2415_202641	re30.peg.3433_163102	rq29.peg.4524_213244
383	group_12411	Cyclohexanone monooxygenase	30	30	1	312	27185				1544	1556	1555	re01.peg.519_519	re02.peg.3710_10891	re03.peg.1814_16040	re05.peg.1250_29713	re06.peg.2856_37883	re07.peg.1252_43465	re08.peg.1121_49506	re09.peg.2018_56900	re14.peg.4540_100369	re15.peg.6683_109334	re17.peg.1500_120406	re18.peg.1020_126856	re19.peg.4491_137037	re20.peg.882_139656	re22.peg.5265_158057	re04.peg.2954_24259	re10.peg.829_62404	re11.peg.2420_73144	re12.peg.6511_85997	re13.peg.4440_93072	re16.peg.4746_116680	re21.peg.172_146248	rq23.peg.4827_171406	rq24.peg.1658_174996	rq25.peg.452_180248	rq26.peg.1762_188286	rq27.peg.3412_197216	rq28.peg.2396_202622	re30.peg.3418_163087	rq29.peg.4509_213229
384	group_12417	putative membrane protein	30	30	1	312	27108				500	548	546	re01.peg.559_559	re02.peg.3755_10936	re03.peg.1853_16079	re05.peg.1290_29753	re06.peg.2817_37844	re07.peg.3349_45562	re08.peg.1160_49545	re09.peg.2058_56940	re14.peg.4501_100330	re15.peg.6624_109275	re17.peg.1540_120446	re18.peg.1061_126897	re19.peg.4452_136998	re20.peg.842_139616	re22.peg.5225_158017	re04.peg.2994_24299	re10.peg.881_62456	re11.peg.5762_76486	re12.peg.7705_87191	re13.peg.4400_93032	re16.peg.4706_116640	re21.peg.133_146209	rq23.peg.4788_171367	rq24.peg.1696_175034	rq25.peg.411_180207	rq26.peg.1800_188324	rq27.peg.3450_197254	rq28.peg.2354_202580	re30.peg.3379_163048	rq29.peg.4469_213189
385	group_12421	FIG00994444: hypothetical protein	30	30	1	312	22696				233	437	284	re01.peg.577_577	re02.peg.1890_9071	re03.peg.4619_18845	re05.peg.1784_30247	re06.peg.4272_39299	re07.peg.1294_43507	re08.peg.2923_51308	re09.peg.4667_59549	re14.peg.1890_97719	re15.peg.2824_105475	re17.peg.1158_120064	re18.peg.1691_127527	re19.peg.1834_134380	re20.peg.3894_142668	re22.peg.2359_155151	re04.peg.6179_27484	re10.peg.2979_64554	re11.peg.5686_76410	re12.peg.7438_86924	re13.peg.3030_91662	re16.peg.3152_115086	re21.peg.1340_147416	rq23.peg.1940_168519	rq24.peg.2775_176113	rq25.peg.6044_185840	rq26.peg.1679_188203	rq27.peg.5697_199501	rq28.peg.3405_203631	re30.peg.607_160276	rq29.peg.1469_210189
386	group_12422	LSU ribosomal protein L3p (L3e)	30	30	1	312	22703				401	677	648	re01.peg.581_581	re02.peg.1893_9074	re03.peg.4616_18842	re05.peg.1787_30250	re06.peg.4269_39296	re07.peg.1297_43510	re08.peg.2927_51312	re09.peg.4664_59546	re14.peg.1894_97723	re15.peg.2827_105478	re17.peg.1155_120061	re18.peg.1694_127530	re19.peg.1837_134383	re20.peg.3897_142671	re22.peg.2363_155155	re04.peg.6181_27486	re10.peg.2983_64558	re11.peg.5690_76414	re12.peg.7441_86927	re13.peg.3027_91659	re16.peg.3148_115082	re21.peg.1336_147412	rq23.peg.1944_168523	rq24.peg.2779_176117	rq25.peg.6048_185844	rq26.peg.1675_188199	rq27.peg.5693_199497	rq28.peg.3409_203635	re30.peg.610_160279	rq29.peg.1473_210193
387	group_12428	DNA-directed RNA polymerase alpha subunit	30	30	1	312	22742				932	1088	1054	re01.peg.610_610	re02.peg.1921_9102	re03.peg.4587_18813	re05.peg.1816_30279	re06.peg.4239_39266	re07.peg.1327_43540	re08.peg.2957_51342	re09.peg.4634_59516	re14.peg.1923_97752	re15.peg.2861_105512	re17.peg.1125_120031	re18.peg.1724_127560	re19.peg.1866_134412	re20.peg.3927_142701	re22.peg.2392_155184	re04.peg.6210_27515	re10.peg.3017_64592	re11.peg.5722_76446	re12.peg.7034_86520	re13.peg.2998_91630	re16.peg.3119_115053	re21.peg.1306_147382	rq23.peg.1973_168552	rq24.peg.2808_176146	rq25.peg.6077_185873	rq26.peg.1646_188170	rq27.peg.5663_199467	rq28.peg.3440_203666	re30.peg.639_160308	rq29.peg.1502_210222
388	group_12431	putative transcriptional regulator TetR family	30	30	1	312	22747				524	584	575	re01.peg.614_614	re02.peg.1925_9106	re03.peg.4583_18809	re05.peg.1820_30283	re06.peg.4235_39262	re07.peg.1331_43544	re08.peg.2961_51346	re09.peg.4630_59512	re14.peg.1927_97756	re15.peg.2866_105517	re17.peg.1121_120027	re18.peg.1728_127564	re19.peg.1870_134416	re20.peg.3931_142705	re22.peg.2396_155188	re04.peg.6214_27519	re10.peg.3022_64597	re11.peg.5727_76451	re12.peg.7029_86515	re13.peg.2994_91626	re16.peg.3115_115049	re21.peg.1302_147378	rq23.peg.1977_168556	rq24.peg.2812_176150	rq25.peg.6081_185877	rq26.peg.1642_188166	rq27.peg.5659_199463	rq28.peg.3444_203670	re30.peg.643_160312	rq29.peg.1506_210226
389	group_12432	LSU ribosomal protein L13p (L13Ae)	30	30	1	312	22771				251	443	435	re01.peg.626_626	re02.peg.1937_9118	re03.peg.4555_18781	re05.peg.1831_30294	re06.peg.4223_39250	re07.peg.1341_43554	re08.peg.2972_51357	re09.peg.4619_59501	re14.peg.1938_97767	re15.peg.2884_105535	re17.peg.1110_120016	re18.peg.1740_127576	re19.peg.1881_134427	re20.peg.3942_142716	re22.peg.2415_155207	re04.peg.1846_23151	re10.peg.3040_64615	re11.peg.5071_75795	re12.peg.8182_87668	re13.peg.2962_91594	re16.peg.3089_115023	re21.peg.1292_147368	rq23.peg.1988_168567	rq24.peg.2822_176160	rq25.peg.6091_185887	rq26.peg.1631_188155	rq27.peg.5649_199453	rq28.peg.3477_203703	re30.peg.654_160323	rq29.peg.1517_210237
390	group_12434	SSU ribosomal protein S9p (S16e)	30	30	1	312	22773				290	512	484	re01.peg.627_627	re02.peg.1938_9119	re03.peg.4554_18780	re05.peg.1832_30295	re06.peg.4222_39249	re07.peg.1342_43555	re08.peg.2973_51358	re09.peg.4618_59500	re14.peg.1939_97768	re15.peg.2885_105536	re17.peg.1109_120015	re18.peg.1741_127577	re19.peg.1882_134428	re20.peg.3943_142717	re22.peg.2416_155208	re04.peg.1847_23152	re10.peg.3042_64617	re11.peg.5069_75793	re12.peg.8183_87669	re13.peg.2961_91593	re16.peg.3088_115022	re21.peg.1291_147367	rq23.peg.1989_168568	rq24.peg.2823_176161	rq25.peg.6092_185888	rq26.peg.1630_188154	rq27.peg.5648_199452	rq28.peg.3478_203704	re30.peg.655_160324	rq29.peg.1518_210238
391	group_12436	Copper binding protein plastocyanin/azurin family	30	30	1	312	22790				254	371	365	re01.peg.634_634	re02.peg.1945_9126	re03.peg.4547_18773	re05.peg.1839_30302	re06.peg.4215_39242	re07.peg.1349_43562	re08.peg.2980_51365	re09.peg.4611_59493	re14.peg.1946_97775	re15.peg.2895_105546	re17.peg.1102_120008	re18.peg.1748_127584	re19.peg.1889_134435	re20.peg.3950_142724	re22.peg.2423_155215	re04.peg.1854_23159	re10.peg.3050_64625	re11.peg.5059_75783	re12.peg.8883_88369	re13.peg.2954_91586	re16.peg.3081_115015	re21.peg.1284_147360	rq23.peg.1996_168575	rq24.peg.2830_176168	rq25.peg.6099_185895	rq26.peg.1623_188147	rq27.peg.5641_199445	rq28.peg.3487_203713	re30.peg.662_160331	rq29.peg.1525_210245
392	group_12439	Inosine-5'-monophosphate dehydrogenase	30	30	1	312	22834				551	1139	1115	re01.peg.659_659	re02.peg.1972_9153	re03.peg.4524_18750	re05.peg.1865_30328	re06.peg.6051_41077	re07.peg.1374_43587	re08.peg.3005_51390	re09.peg.4586_59468	re14.peg.1971_97800	re15.peg.2925_105576	re17.peg.1078_119984	re18.peg.1772_127608	re19.peg.1913_134459	re20.peg.3975_142749	re22.peg.2448_155240	re04.peg.1880_23185	re10.peg.5121_66696	re11.peg.5031_75755	re12.peg.7634_87120	re13.peg.2929_91561	re16.peg.3056_114990	re21.peg.1259_147335	rq23.peg.2022_168601	rq24.peg.2855_176193	rq25.peg.6124_185920	rq26.peg.1598_188122	rq27.peg.5617_199421	rq28.peg.7586_207811	re30.peg.687_160356	rq29.peg.1550_210270
393	group_12445	Adenosine deaminase	30	30	1	312	23053				734	1085	1073	re01.peg.783_783	re02.peg.2098_9279	re03.peg.1263_15489	re05.peg.1987_30450	re06.peg.6168_41194	re07.peg.1490_43703	re08.peg.3123_51508	re09.peg.4469_59351	re14.peg.2089_97918	re15.peg.3091_105742	re17.peg.957_119863	re18.peg.1891_127727	re19.peg.2033_134579	re20.peg.4091_142865	re22.peg.2563_155355	re04.peg.2008_23313	re10.peg.2112_63687	re11.peg.4850_75574	re12.peg.2736_82222	re13.peg.5541_94173	re16.peg.2934_114868	re21.peg.1126_147202	rq23.peg.2147_168726	rq24.peg.2980_176318	rq25.peg.4106_183902	rq26.peg.4479_191003	rq27.peg.5503_199307	rq28.peg.4910_205136	re30.peg.813_160482	rq29.peg.800_209520
394	group_12449	N-acyl-L-amino acid amidohydrolase AmiA1	30	30	1	312	23075				737	1148	1123	re01.peg.794_794	re02.peg.2110_9291	re03.peg.1252_15478	re05.peg.1998_30461	re06.peg.6179_41205	re07.peg.1501_43714	re08.peg.3134_51519	re09.peg.4458_59340	re14.peg.2100_97929	re15.peg.3105_105756	re17.peg.946_119852	re18.peg.1902_127738	re19.peg.2044_134590	re20.peg.4102_142876	re22.peg.2592_155384	re04.peg.2019_23324	re10.peg.2097_63672	re11.peg.2684_73408	re12.peg.6175_85661	re13.peg.5530_94162	re16.peg.2923_114857	re21.peg.1115_147191	rq23.peg.2176_168755	rq24.peg.2991_176329	rq25.peg.4117_183913	rq26.peg.4490_191014	rq27.peg.5492_199296	rq28.peg.8164_208389	re30.peg.824_160493	rq29.peg.789_209509
395	group_12452	FIG00820092: hypothetical protein	30	30	1	312	23115				278	941	913	re01.peg.813_813	re02.peg.2131_9312	re03.peg.1232_15458	re05.peg.2016_30479	re06.peg.6199_41225	re07.peg.1519_43732	re08.peg.3152_51537	re09.peg.4440_59322	re14.peg.2118_97947	re15.peg.3129_105780	re17.peg.925_119831	re18.peg.1922_127758	re19.peg.2064_134610	re20.peg.4120_142894	re22.peg.2610_155402	re04.peg.2040_23345	re10.peg.2075_63650	re11.peg.2709_73433	re12.peg.6203_85689	re13.peg.5512_94144	re16.peg.2903_114837	re21.peg.1097_147173	rq23.peg.2205_168784	rq24.peg.3011_176349	rq25.peg.4137_183933	rq26.peg.4508_191032	rq27.peg.5474_199278	rq28.peg.2952_203178	re30.peg.842_160511	rq29.peg.769_209489
396	group_12453	Biotin--protein ligase (EC 6.3.4.9 EC 6.3.4.10 EC 6.3.4.11 EC 6.3.4.15)	30	30	1	312	23199				623	854	844	re01.peg.850_850	re02.peg.2175_9356	re03.peg.5427_19653	re05.peg.2054_30517	re06.peg.6236_41262	re07.peg.1554_43767	re08.peg.2362_50747	re09.peg.4405_59287	re14.peg.2155_97984	re15.peg.3185_105836	re17.peg.887_119793	re18.peg.1960_127796	re19.peg.2101_134647	re20.peg.4157_142931	re22.peg.2647_155439	re04.peg.3638_24943	re10.peg.7379_68954	re11.peg.2759_73483	re12.peg.4162_83648	re13.peg.5475_94107	re16.peg.3439_115373	re21.peg.1060_147136	rq23.peg.2242_168821	rq24.peg.3047_176385	rq25.peg.4175_183971	rq26.peg.4545_191069	rq27.peg.5438_199242	rq28.peg.2996_203222	re30.peg.879_160548	rq29.peg.3010_211730
397	group_12457	D-glycero-D-manno-heptose 1-phosphate guanosyltransferase	30	30	1	312	23224				500	1082	1054	re01.peg.867_867	re02.peg.2193_9374	re03.peg.5410_19636	re05.peg.2072_30535	re06.peg.6253_41279	re07.peg.1571_43784	re08.peg.2379_50764	re09.peg.4388_59270	re14.peg.2172_98001	re15.peg.3208_105859	re17.peg.870_119776	re18.peg.1977_127813	re19.peg.2118_134664	re20.peg.4174_142948	re22.peg.2664_155456	re04.peg.3620_24925	re10.peg.7357_68932	re11.peg.2779_73503	re12.peg.4186_83672	re13.peg.5458_94090	re16.peg.3422_115356	re21.peg.1043_147119	rq23.peg.2259_168838	rq24.peg.2732_176070	rq25.peg.4192_183988	rq26.peg.4562_191086	rq27.peg.5421_199225	rq28.peg.3015_203241	re30.peg.896_160565	rq29.peg.3027_211747
398	group_12461	Ribosome small subunit-stimulated GTPase EngC	30	30	1	312	23277				125	1262	867	re01.peg.900_900	re02.peg.2233_9414	re03.peg.5377_19603	re05.peg.2105_30568	re06.peg.6289_41315	re07.peg.1603_43816	re08.peg.2413_50798	re09.peg.4355_59237	re14.peg.2206_98035	re15.peg.3261_105912	re17.peg.838_119744	re18.peg.2013_127849	re19.peg.2151_134697	re20.peg.4207_142981	re22.peg.2697_155489	re04.peg.3587_24892	re10.peg.7768_69343	re11.peg.7539_78263	re12.peg.7226_86712	re13.peg.5426_94058	re16.peg.3389_115323	re21.peg.1011_147087	rq23.peg.2291_168870	rq24.peg.2764_176102	rq25.peg.4224_184020	rq26.peg.4593_191117	rq27.peg.5389_199193	rq28.peg.3049_203275	re30.peg.927_160596	rq29.peg.3059_211779
399	group_12474	Ribonucleotide reductase of class Ib (aerobic) beta subunit	30	30	1	312	23588				743	1028	960	re01.peg.1019_1019	re02.peg.2362_9543	re03.peg.4512_18738	re05.peg.2236_30699	re06.peg.6408_41434	re07.peg.1725_43938	re08.peg.2533_50918	re09.peg.4237_59119	re14.peg.2323_98152	re15.peg.3430_106081	re17.peg.719_119625	re18.peg.3239_129074	re19.peg.2270_134816	re20.peg.4325_143099	re22.peg.2874_155666	re04.peg.4266_25571	re10.peg.2854_64429	re11.peg.5924_76648	re12.peg.6565_86051	re13.peg.4771_93403	re16.peg.3270_115204	re21.peg.4874_150950	rq23.peg.2536_169115	rq24.peg.5850_179188	rq25.peg.4344_184140	rq26.peg.5255_191779	rq27.peg.5272_199076	rq28.peg.5774_205999	re30.peg.1049_160718	rq29.peg.6292_215012
400	group_12475	Putative two-component system response regulator	30	30	1	312	23698				149	722	650	re01.peg.1054_1054	re02.peg.2404_9585	re03.peg.4476_18702	re05.peg.2274_30737	re06.peg.6443_41469	re07.peg.1760_43973	re08.peg.2569_50954	re09.peg.4202_59084	re14.peg.2358_98187	re15.peg.3481_106132	re17.peg.1642_120548	re18.peg.3201_129036	re19.peg.2306_134852	re20.peg.4361_143135	re22.peg.2909_155701	re04.peg.4230_25535	re10.peg.2909_64484	re11.peg.8443_79167	re12.peg.7587_87073	re13.peg.4814_93446	re16.peg.1360_113294	re21.peg.4910_150986	rq23.peg.2571_169150	rq24.peg.2616_175954	rq25.peg.4381_184177	rq26.peg.5290_191814	rq27.peg.5235_199039	rq28.peg.6851_207076	re30.peg.1085_160754	rq29.peg.1965_210685
401	group_12478	FIG00997866: hypothetical protein	30	30	1	312	23906				260	452	424	re01.peg.1100_1100	re02.peg.2460_9641	re03.peg.4430_18656	re05.peg.2321_30784	re06.peg.6498_41524	re07.peg.1806_44019	re08.peg.2616_51001	re09.peg.4156_59038	re14.peg.2404_98233	re15.peg.3545_106196	re17.peg.1687_120593	re18.peg.3155_128990	re19.peg.2352_134898	re20.peg.4407_143181	re22.peg.2956_155748	re04.peg.5776_27081	re10.peg.7854_69429	re11.peg.6755_77479	re12.peg.8540_88026	re13.peg.4860_93492	re16.peg.4298_116232	re21.peg.2943_149019	rq23.peg.2616_169195	rq24.peg.2570_175908	rq25.peg.4426_184222	rq26.peg.1103_187627	rq27.peg.5190_198994	rq28.peg.5757_205982	re30.peg.1132_160801	rq29.peg.1919_210639
402	group_12479	Ammonium transporter	30	30	1	312	23913				653	1304	1272	re01.peg.1105_1105	re02.peg.2466_9647	re03.peg.4425_18651	re05.peg.2326_30789	re06.peg.6503_41529	re07.peg.1811_44024	re08.peg.2621_51006	re09.peg.4151_59033	re14.peg.2409_98238	re15.peg.3551_106202	re17.peg.1692_120598	re18.peg.3150_128985	re19.peg.2357_134903	re20.peg.4412_143186	re22.peg.2962_155754	re04.peg.5771_27076	re10.peg.2050_63625	re11.peg.3613_74337	re12.peg.8671_88157	re13.peg.4865_93497	re16.peg.4293_116227	re21.peg.2948_149024	rq23.peg.2621_169200	rq24.peg.2565_175903	rq25.peg.4431_184227	rq26.peg.1098_187622	rq27.peg.5185_198989	rq28.peg.5750_205975	re30.peg.1137_160806	rq29.peg.1914_210634
403	group_12481	FIG007808: hypothetical protein	30	30	1	312	31015				332	683	666	re01.peg.1135_1135	re02.peg.1760_8941	re03.peg.3051_17277	re05.peg.3872_32335	6666666.340933.peg.385_35413	re07.peg.4118_46331	re08.peg.2856_51241	re09.peg.633_55515	re14.peg.6008_101837	re15.peg.8707_111358	re17.peg.4348_123254	re18.peg.2098_127934	re19.peg.5919_138465	re20.peg.2279_141053	re22.peg.6660_159452	re04.peg.4204_25509	re10.peg.7624_69199	re11.peg.6938_77662	re12.peg.6938_86424	re13.peg.6727_95359	re16.peg.5882_117816	re21.peg.2796_148872	rq23.peg.6339_172918	rq24.peg.3439_176777	rq25.peg.1954_181750	rq26.peg.6649_193173	rq27.peg.1938_195742	rq28.peg.1291_201517	re30.peg.4942_164611	rq29.peg.1828_210548
404	group_12485	DNA recombination and repair protein RecF	30	30	1	312	19945				257	1229	1189	re01.peg.1152_1152	re02.peg.1743_8924	re03.peg.3037_17263	re05.peg.3888_32351	6666666.340933.peg.399_35427	re07.peg.4104_46317	re08.peg.2842_51227	re09.peg.619_55501	re14.peg.4_95833	re15.peg.19_102670	re17.peg.4333_123239	re18.peg.2113_127949	re19.peg.4_132550	re20.peg.2294_141068	re22.peg.430_153222	re04.peg.4190_25495	re10.peg.7606_69181	re11.peg.6956_77680	re12.peg.6960_86446	re13.peg.6743_95375	re16.peg.5868_117802	re21.peg.2811_148887	rq23.peg.4_166583	rq24.peg.3425_176763	rq25.peg.1939_181735	rq26.peg.6635_193159	rq27.peg.1922_195726	rq28.peg.1274_201500	re30.peg.46_159715	rq29.peg.1843_210563
405	group_12494	FIG00998749: hypothetical protein	30	30	1	312	5567				302	458	445	re01.peg.1248_1248	re02.peg.1628_8809	re03.peg.2969_17195	re05.peg.3974_32437	6666666.340933.peg.474_35502	re07.peg.4036_46249	re08.peg.2767_51152	re09.peg.534_55416	re14.peg.85_95914	re15.peg.131_102782	re17.peg.4241_123147	re18.peg.2196_128032	re19.peg.85_132631	re20.peg.2374_141148	re22.peg.510_153302	re04.peg.4123_25428	re10.peg.3661_65236	re11.peg.3992_74716	re12.peg.1590_81076	re13.peg.6818_95450	re16.peg.5800_117734	re21.peg.3791_149867	rq23.peg.93_166672	rq24.peg.3319_176657	rq25.peg.1867_181663	rq26.peg.864_187388	rq27.peg.1813_195617	rq28.peg.1163_201389	re30.peg.122_159791	rq29.peg.6160_214880
406	group_12504	Transcriptional regulator GntR family	30	30	1	312	5757				713	722	721	re01.peg.1330_1330	re02.peg.1553_8734	re03.peg.2893_17119	re05.peg.4044_32507	6666666.340933.peg.543_35571	re07.peg.3958_46171	re08.peg.2699_51084	re09.peg.463_55345	re14.peg.154_95983	re15.peg.233_102884	re17.peg.2658_121564	re18.peg.2267_128103	re19.peg.157_132703	re20.peg.2452_141226	re22.peg.580_153372	re04.peg.4679_25984	re10.peg.5425_67000	re11.peg.5522_76246	re12.peg.4313_83799	re13.peg.6887_95519	re16.peg.5687_117621	re21.peg.4363_150439	rq23.peg.164_166743	rq24.peg.3243_176581	rq25.peg.1797_181593	rq26.peg.794_187318	rq27.peg.1743_195547	rq28.peg.1079_201305	re30.peg.192_159861	rq29.peg.6238_214958
407	group_12505	possible membrane protein	30	30	1	312	5773				464	713	694	re01.peg.1339_1339	re02.peg.1545_8726	re03.peg.2885_17111	re05.peg.4052_32515	6666666.340933.peg.551_35579	re07.peg.3950_46163	re08.peg.2691_51076	re09.peg.455_55337	re14.peg.162_95991	re15.peg.242_102893	re17.peg.2651_121557	re18.peg.2276_128112	re19.peg.165_132711	re20.peg.2461_141235	re22.peg.588_153380	re04.peg.4686_25991	re10.peg.5414_66989	re11.peg.5532_76256	re12.peg.4301_83787	re13.peg.6894_95526	re16.peg.5680_117614	re21.peg.4370_150446	rq23.peg.171_166750	rq24.peg.3236_176574	rq25.peg.1790_181586	rq26.peg.787_187311	rq27.peg.1736_195540	rq28.peg.1071_201297	re30.peg.199_159868	rq29.peg.6245_214965
408	group_12508	possible hydrolase	30	30	1	312	5798				686	1322	810	re01.peg.1355_1355	re02.peg.1528_8709	re03.peg.2868_17094	re05.peg.4069_32532	6666666.340933.peg.568_35596	re07.peg.3933_46146	re08.peg.2674_51059	re09.peg.438_55320	re14.peg.179_96008	re15.peg.263_102914	re17.peg.2633_121539	re18.peg.2294_128130	re19.peg.182_132728	re20.peg.2478_141252	re22.peg.605_153397	re04.peg.4704_26009	re10.peg.5391_66966	re11.peg.8124_78848	re12.peg.4280_83766	re13.peg.6911_95543	re16.peg.5662_117596	re21.peg.4388_150464	rq23.peg.188_166767	rq24.peg.3218_176556	rq25.peg.1772_181568	rq26.peg.769_187293	rq27.peg.1718_195522	rq28.peg.1052_201278	re30.peg.217_159886	rq29.peg.6263_214983
409	group_12511	putative phosphoglycerate mutase	30	30	1	312	5830				659	872	678	re01.peg.1370_1370	re02.peg.1512_8693	re03.peg.2853_17079	re05.peg.4084_32547	re06.peg.583_35611	re07.peg.3918_46131	re08.peg.2659_51044	re09.peg.423_55305	re14.peg.194_96023	re15.peg.279_102930	re17.peg.2618_121524	re18.peg.6399_132234	re19.peg.197_132743	re20.peg.2493_141267	re22.peg.620_153412	re04.peg.4719_26024	re10.peg.8860_70435	re11.peg.7949_78673	re12.peg.6905_86391	re13.peg.6926_95558	re16.peg.5647_117581	re21.peg.5544_151620	rq23.peg.203_166782	rq24.peg.3203_176541	rq25.peg.1757_181553	rq26.peg.754_187278	rq27.peg.1703_195507	rq28.peg.1034_201260	re30.peg.232_159901	rq29.peg.6278_214998
410	group_12512	Seryl-tRNA synthetase	30	30	1	312	5845				896	1253	1210	re01.peg.1378_1378	re02.peg.1503_8684	re03.peg.2845_17071	re05.peg.4094_32557	re06.peg.591_35619	re07.peg.3910_46123	re08.peg.2651_51036	re09.peg.415_55297	re14.peg.202_96031	re15.peg.293_102944	re17.peg.2610_121516	re18.peg.6391_132226	re19.peg.205_132751	re20.peg.2501_141275	re22.peg.628_153420	re04.peg.4727_26032	re10.peg.7991_69566	re11.peg.7939_78663	re12.peg.6915_86401	re13.peg.6934_95566	re16.peg.5639_117573	re21.peg.5536_151612	rq23.peg.211_166790	rq24.peg.3195_176533	rq25.peg.1749_181545	rq26.peg.746_187270	rq27.peg.1695_195499	rq28.peg.1026_201252	re30.peg.240_159909	rq29.peg.6286_215006
411	group_12516	3-oxoacyl-[acyl-carrier protein] reductase paralog	30	30	1	312	5947				614	761	750	re01.peg.1421_1421	re02.peg.1437_8618	re03.peg.987_15213	re05.peg.3416_31879	re06.peg.3799_38826	re07.peg.3871_46084	re08.peg.5135_53520	re09.peg.375_55257	re14.peg.243_96072	re15.peg.384_103035	re17.peg.2566_121472	re18.peg.2596_128432	re19.peg.244_132790	re20.peg.2540_141314	re22.peg.667_153459	re04.peg.5446_26751	re10.peg.3285_64860	re11.peg.1999_72723	re12.peg.2200_81686	re13.peg.6977_95609	re16.peg.1426_113360	re21.peg.4140_150216	rq23.peg.252_166831	rq24.peg.3154_176492	rq25.peg.1707_181503	rq26.peg.702_187226	rq27.peg.1654_195458	rq28.peg.1767_201993	re30.peg.284_159953	rq29.peg.3507_212227
412	group_12521	FIG00822637: hypothetical protein	30	30	1	312	6173				500	827	520	re01.peg.1492_1492	re02.peg.1356_8537	re03.peg.1056_15282	re05.peg.3338_31801	re06.peg.3719_38746	re07.peg.3799_46012	re08.peg.5545_53930	re09.peg.291_55173	re14.peg.326_96155	re15.peg.510_103161	re17.peg.2467_121373	re18.peg.2667_128503	re19.peg.321_132867	re20.peg.2621_141395	re22.peg.763_153555	re04.peg.3763_25068	re10.peg.3193_64768	re11.peg.3467_74191	re12.peg.2294_81780	re13.peg.5194_93826	re16.peg.1505_113439	re21.peg.4072_150148	rq23.peg.339_166918	rq24.peg.3065_176403	rq25.peg.1624_181420	rq26.peg.603_187127	rq27.peg.1563_195367	rq28.peg.1637_201863	re30.peg.383_160052	rq29.peg.3413_212133
413	group_12530	transcriptional regulator	30	30	1	312	6272				407	608	595	re01.peg.1541_1541	re02.peg.1307_8488	re03.peg.1131_15357	re05.peg.3261_31724	re06.peg.3672_38699	re07.peg.5092_47305	re08.peg.5595_53980	re09.peg.267_55149	re14.peg.385_96214	re15.peg.567_103218	re17.peg.2443_121349	re18.peg.2714_128550	re19.peg.345_132891	re20.peg.2668_141442	re22.peg.787_153579	re04.peg.3715_25020	re10.peg.1523_63098	re11.peg.6587_77311	re12.peg.3253_82739	re13.peg.5242_93874	re16.peg.1529_113463	re21.peg.4048_150124	rq23.peg.411_166990	rq24.peg.5009_178347	rq25.peg.1577_181373	rq26.peg.555_187079	rq27.peg.1515_195319	rq28.peg.1610_201836	re30.peg.431_160100	rq29.peg.3365_212085
414	group_12531	possible transcriptional regulator AraC family	30	30	1	312	6287				542	779	771	re01.peg.1546_1546	re02.peg.1302_8483	re03.peg.3404_17630	re05.peg.3256_31719	re06.peg.3667_38694	re07.peg.5097_47310	re08.peg.4288_52673	re09.peg.262_55144	re14.peg.390_96219	re15.peg.576_103227	re17.peg.2438_121344	re18.peg.2719_128555	re19.peg.350_132896	re20.peg.2673_141447	re22.peg.792_153584	re04.peg.3710_25015	re10.peg.1512_63087	re11.peg.6579_77303	re12.peg.3263_82749	re13.peg.5247_93879	re16.peg.1534_113468	re21.peg.4043_150119	rq23.peg.416_166995	rq24.peg.5014_178352	rq25.peg.1572_181368	rq26.peg.550_187074	rq27.peg.1510_195314	rq28.peg.1601_201827	re30.peg.436_160105	rq29.peg.3360_212080
415	group_12532	FIG00999828: hypothetical protein	30	30	1	312	6306				173	581	558	re01.peg.1555_1555	re02.peg.1294_8475	re03.peg.3394_17620	re05.peg.3246_31709	re06.peg.3657_38684	re07.peg.5107_47320	re08.peg.4281_52666	re09.peg.255_55137	re14.peg.399_96228	re15.peg.586_103237	re17.peg.2429_121335	re18.peg.2726_128562	re19.peg.360_132906	re20.peg.2680_141454	re22.peg.802_153594	re04.peg.3703_25008	re10.peg.1503_63078	re11.peg.6570_77294	re12.peg.3274_82760	re13.peg.5255_93887	re16.peg.1541_113475	re21.peg.4036_150112	rq23.peg.423_167002	rq24.peg.5022_178360	rq25.peg.1564_181360	rq26.peg.542_187066	rq27.peg.1502_195306	rq28.peg.1593_201819	re30.peg.444_160113	rq29.peg.3352_212072
416	group_12534	Transcriptional regulator AraC family	30	30	1	312	6311				890	1004	998	re01.peg.1558_1558	re02.peg.1291_8472	re03.peg.3391_17617	re05.peg.3243_31706	re06.peg.3654_38681	re07.peg.5110_47323	re08.peg.4278_52663	re09.peg.252_55134	re14.peg.402_96231	re15.peg.591_103242	re17.peg.2426_121332	re18.peg.2729_128565	re19.peg.363_132909	re20.peg.2683_141457	re22.peg.805_153597	re04.peg.3700_25005	re10.peg.1500_63075	re11.peg.6566_77290	re12.peg.3277_82763	re13.peg.5258_93890	re16.peg.1544_113478	re21.peg.4033_150109	rq23.peg.426_167005	rq24.peg.5025_178363	rq25.peg.1561_181357	rq26.peg.539_187063	rq27.peg.1499_195303	rq28.peg.1590_201816	re30.peg.447_160116	rq29.peg.3349_212069
417	group_12537	Probable taurine catabolism dioxygenase	30	30	1	312	6314				899	923	899	re01.peg.1561_1561	re02.peg.1288_8469	re03.peg.3388_17614	re05.peg.3240_31703	re06.peg.3651_38678	re07.peg.5113_47326	re08.peg.4275_52660	re09.peg.249_55131	re14.peg.405_96234	re15.peg.594_103245	re17.peg.2423_121329	re18.peg.2732_128568	re19.peg.366_132912	re20.peg.2686_141460	re22.peg.808_153600	re04.peg.3697_25002	re10.peg.1497_63072	re11.peg.6563_77287	re12.peg.3281_82767	re13.peg.5261_93893	re16.peg.1547_113481	re21.peg.4030_150106	rq23.peg.429_167008	rq24.peg.5028_178366	rq25.peg.1558_181354	rq26.peg.536_187060	rq27.peg.1496_195300	rq28.peg.7771_207996	re30.peg.450_160119	rq29.peg.3346_212066
418	group_12538	hypothetical protein	30	30	1	312	6319				326	371	344	re01.peg.1566_1566	re02.peg.1282_8463	re03.peg.3383_17609	re05.peg.3234_31697	re06.peg.3646_38673	re07.peg.5118_47331	re08.peg.4270_52655	re09.peg.244_55126	re14.peg.410_96239	re15.peg.602_103253	re17.peg.2418_121324	re18.peg.2737_128573	re19.peg.371_132917	re20.peg.2691_141465	re22.peg.813_153605	re04.peg.3692_24997	re10.peg.1492_63067	re11.peg.6557_77281	re12.peg.3286_82772	re13.peg.5266_93898	re16.peg.1552_113486	re21.peg.4025_150101	rq23.peg.434_167013	rq24.peg.5033_178371	rq25.peg.1553_181349	rq26.peg.531_187055	rq27.peg.1491_195295	rq28.peg.7766_207991	re30.peg.455_160124	rq29.peg.3341_212061
419	group_12540	probable secreted protein	30	30	1	312	6357				314	800	783	re01.peg.1582_1582	re02.peg.1263_8444	re03.peg.3366_17592	re05.peg.3215_31678	re06.peg.3628_38655	re07.peg.5136_47349	re08.peg.4252_52637	re09.peg.226_55108	re14.peg.427_96256	re15.peg.626_103277	re17.peg.2402_121308	re18.peg.2755_128591	re19.peg.389_132935	re20.peg.2709_141483	re22.peg.830_153622	re04.peg.3675_24980	re10.peg.1473_63048	re11.peg.6621_77345	re12.peg.3314_82800	re13.peg.5285_93917	re16.peg.1570_113504	re21.peg.4009_150085	rq23.peg.452_167031	rq24.peg.5051_178389	rq25.peg.1536_181332	rq26.peg.513_187037	rq27.peg.1472_195276	rq28.peg.3884_204110	re30.peg.473_160142	rq29.peg.3323_212043
420	group_12542	Transcriptional regulator TetR family	30	30	1	312	6361				542	635	569	re01.peg.1585_1585	re02.peg.1260_8441	re03.peg.3363_17589	re05.peg.3212_31675	re06.peg.3625_38652	re07.peg.5139_47352	re08.peg.4249_52634	re09.peg.223_55105	re14.peg.430_96259	re15.peg.629_103280	re17.peg.2399_121305	re18.peg.2758_128594	re19.peg.392_132938	re20.peg.2712_141486	re22.peg.833_153625	re04.peg.3672_24977	re10.peg.1469_63044	re11.peg.6618_77342	re12.peg.3317_82803	re13.peg.5288_93920	re16.peg.1573_113507	re21.peg.4006_150082	rq23.peg.455_167034	rq24.peg.5054_178392	rq25.peg.1533_181329	rq26.peg.510_187034	rq27.peg.1469_195273	rq28.peg.3887_204113	re30.peg.476_160145	rq29.peg.3320_212040
421	group_12543	Transcriptional factor in putative operon for degradation of branched-chain alkanes nitroalkanes and may be also cyclic ketones alkenoic acids	30	30	1	312	6366				578	713	704	re01.peg.1587_1587	re02.peg.1258_8439	re03.peg.3361_17587	re05.peg.3210_31673	re06.peg.3623_38650	re07.peg.5141_47354	re08.peg.4247_52632	re09.peg.221_55103	re14.peg.432_96261	re15.peg.632_103283	re17.peg.2397_121303	re18.peg.2760_128596	re19.peg.394_132940	re20.peg.2714_141488	re22.peg.835_153627	re04.peg.3670_24975	re10.peg.1467_63042	re11.peg.6616_77340	re12.peg.3319_82805	re13.peg.5290_93922	re16.peg.1575_113509	re21.peg.4004_150080	rq23.peg.457_167036	rq24.peg.5056_178394	rq25.peg.1531_181327	rq26.peg.508_187032	rq27.peg.1467_195271	rq28.peg.3890_204116	re30.peg.478_160147	rq29.peg.3318_212038
422	group_12544	hypothetical protein	30	30	1	312	6368				428	428	428	re01.peg.1589_1589	re02.peg.1256_8437	re03.peg.3359_17585	re05.peg.3208_31671	re06.peg.3621_38648	re07.peg.5143_47356	re08.peg.4245_52630	re09.peg.219_55101	re14.peg.434_96263	re15.peg.634_103285	re17.peg.2395_121301	re18.peg.2762_128598	re19.peg.396_132942	re20.peg.2716_141490	re22.peg.837_153629	re04.peg.3668_24973	re10.peg.1464_63039	re11.peg.6614_77338	re12.peg.3322_82808	re13.peg.5292_93924	re16.peg.1577_113511	re21.peg.4002_150078	rq23.peg.459_167038	rq24.peg.5058_178396	rq25.peg.1529_181325	rq26.peg.506_187030	rq27.peg.1465_195269	rq28.peg.3892_204118	re30.peg.480_160149	rq29.peg.3316_212036
423	group_12545	3-oxoacyl-[acyl-carrier protein] reductase	30	30	1	312	6372				836	854	849	re01.peg.1593_1593	re02.peg.1251_8432	re03.peg.3355_17581	re05.peg.3204_31667	re06.peg.3617_38644	re07.peg.5147_47360	re08.peg.4241_52626	re09.peg.215_55097	re14.peg.438_96267	re15.peg.639_103290	re17.peg.2391_121297	re18.peg.2766_128602	re19.peg.400_132946	re20.peg.2720_141494	re22.peg.841_153633	re04.peg.3664_24969	re10.peg.1459_63034	re11.peg.6610_77334	re12.peg.3327_82813	re13.peg.5296_93928	re16.peg.1581_113515	re21.peg.3998_150074	rq23.peg.463_167042	rq24.peg.5062_178400	rq25.peg.1525_181321	rq26.peg.502_187026	rq27.peg.1461_195265	rq28.peg.3896_204122	re30.peg.484_160153	rq29.peg.3312_212032
424	group_12549	Hydroxymethylglutaryl-CoA lyase	30	30	1	312	6418				737	911	905	re01.peg.1617_1617	re02.peg.1222_8403	re03.peg.3329_17555	re05.peg.3176_31639	re06.peg.3591_38618	re07.peg.5173_47386	re08.peg.4215_52600	re09.peg.187_55069	re14.peg.463_96292	re15.peg.672_103323	re17.peg.2365_121271	re18.peg.5546_131381	re19.peg.425_132971	re20.peg.2745_141519	re22.peg.866_153658	re04.peg.5152_26457	re10.peg.1414_62989	re11.peg.3823_74547	re12.peg.3784_83270	re13.peg.2534_91166	re16.peg.873_112807	re21.peg.3696_149772	rq23.peg.488_167067	rq24.peg.5087_178425	rq25.peg.4697_184493	rq26.peg.476_187000	rq27.peg.1438_195242	rq28.peg.3927_204153	re30.peg.510_160179	rq29.peg.3785_212505
425	group_12550	FIG00995560: hypothetical protein	30	30	1	312	6441				602	647	643	re01.peg.1625_1625	re02.peg.1211_8392	re03.peg.3320_17546	re05.peg.3166_31629	re06.peg.3582_38609	re07.peg.5181_47394	re08.peg.4206_52591	re09.peg.177_55059	re14.peg.472_96301	re15.peg.684_103335	re17.peg.2356_121262	re18.peg.5555_131390	re19.peg.434_132980	re20.peg.2754_141528	re22.peg.875_153667	re04.peg.5143_26448	re10.peg.1403_62978	re11.peg.3837_74561	re12.peg.3772_83258	re13.peg.2525_91157	re16.peg.882_112816	re21.peg.3705_149781	rq23.peg.497_167076	rq24.peg.5096_178434	rq25.peg.4706_184502	rq26.peg.466_186990	rq27.peg.1429_195233	rq28.peg.3939_204165	re30.peg.520_160189	rq29.peg.3794_212514
426	group_12551	sensor histidine kinase	30	30	1	312	6453				209	1379	1266	re01.peg.1630_1630	re02.peg.1206_8387	re03.peg.3315_17541	re05.peg.3162_31625	re06.peg.3577_38604	re07.peg.5187_47400	re08.peg.4190_52575	re09.peg.163_55045	re14.peg.478_96307	re15.peg.708_103359	re17.peg.2351_121257	re18.peg.5562_131397	re19.peg.439_132985	re20.peg.2759_141533	re22.peg.890_153682	re04.peg.5139_26444	re10.peg.1380_62955	re11.peg.3842_74566	re12.peg.3745_83231	re13.peg.2521_91153	re16.peg.886_112820	re21.peg.3709_149785	rq23.peg.501_167080	rq24.peg.5100_178438	rq25.peg.4710_184506	rq26.peg.462_186986	rq27.peg.1425_195229	rq28.peg.3945_204171	re30.peg.524_160193	rq29.peg.3798_212518
427	group_12558	Thioesterase in siderophore biosynthesis gene cluster	30	30	1	312	19573				260	419	413	re01.peg.1661_1661	re02.peg.6767_13948	re03.peg.5223_19449	re05.peg.4823_33286	re06.peg.5461_40488	re07.peg.4185_46398	re08.peg.3961_52346	re09.peg.2855_57737	re14.peg.3688_99517	re15.peg.5453_108104	re17.peg.4222_123128	re18.peg.3847_129682	re19.peg.3629_136175	re20.peg.5773_144547	re22.peg.4402_157194	re04.peg.950_22255	re10.peg.7277_68852	re11.peg.1479_72203	re12.peg.8065_87551	re13.peg.4044_92676	re16.peg.3645_115579	re21.peg.4635_150711	rq23.peg.3884_170463	rq24.peg.4944_178282	rq25.peg.5208_185004	rq26.peg.4148_190672	rq27.peg.4254_198058	rq28.peg.5130_205355	re30.peg.2470_162139	rq29.peg.2849_211569
428	group_12560	ATP-dependent Clp protease proteolytic subunit	30	30	1	312	19545				548	626	593	re01.peg.1680_1680	re02.peg.6743_13924	re03.peg.5204_19430	re05.peg.4842_33305	re06.peg.5441_40468	re07.peg.4204_46417	re08.peg.3981_52366	re09.peg.2875_57757	re14.peg.3668_99497	re15.peg.5423_108074	re17.peg.4202_123108	re18.peg.3827_129662	re19.peg.3609_136155	re20.peg.5753_144527	re22.peg.4383_157175	re04.peg.971_22276	re10.peg.7302_68877	re11.peg.1454_72178	re12.peg.7925_87411	re13.peg.4064_92696	re16.peg.3624_115558	re21.peg.4655_150731	rq23.peg.3865_170444	rq24.peg.4925_178263	rq25.peg.5188_184984	rq26.peg.4129_190653	rq27.peg.4235_198039	rq28.peg.5108_205334	re30.peg.2451_162120	rq29.peg.2868_211588
429	group_12562	Gamma-glutamyl phosphate reductase	30	30	1	312	19464				224	1286	1248	re01.peg.1717_1717	re02.peg.5616_12797	re03.peg.5168_19394	re05.peg.4878_33341	re06.peg.5405_40432	re07.peg.4240_46453	re08.peg.4019_52404	re09.peg.2911_57793	re14.peg.3632_99461	re15.peg.5368_108019	re17.peg.4166_123072	re18.peg.3789_129624	re19.peg.3573_136119	re20.peg.5717_144491	re22.peg.4347_157139	re04.peg.1006_22311	re10.peg.2566_64141	re11.peg.1403_72127	re12.peg.6772_86258	re13.peg.4100_92732	re16.peg.3589_115523	re21.peg.4690_150766	rq23.peg.3829_170408	rq24.peg.4890_178228	rq25.peg.5151_184947	rq26.peg.4094_190618	rq27.peg.4200_198004	rq28.peg.5337_205562	re30.peg.2416_162085	rq29.peg.2904_211624
430	group_12567	FIG00995287: hypothetical protein	30	30	1	312	19413				206	206	206	re01.peg.1738_1738	re02.peg.5593_12774	re03.peg.5147_19373	re05.peg.4900_33363	re06.peg.5384_40411	re07.peg.4261_46474	re08.peg.4040_52425	re09.peg.2932_57814	re14.peg.3611_99440	re15.peg.5335_107986	re17.peg.4145_123051	re18.peg.3766_129601	re19.peg.3552_136098	re20.peg.5696_144470	re22.peg.4326_157118	re04.peg.1027_22332	re10.peg.2601_64176	re11.peg.4866_75590	re12.peg.7300_86786	re13.peg.4121_92753	re16.peg.3568_115502	re21.peg.4711_150787	rq23.peg.3808_170387	rq24.peg.4869_178207	rq25.peg.5130_184926	rq26.peg.4023_190547	rq27.peg.4179_197983	rq28.peg.5362_205587	re30.peg.2395_162064	rq29.peg.2925_211645
431	group_12568	Universal stress protein family	30	30	1	312	19405				854	995	899	re01.peg.1743_1743	re02.peg.5588_12769	re03.peg.5142_19368	re05.peg.4905_33368	re06.peg.5379_40406	re07.peg.4266_46479	re08.peg.4045_52430	re09.peg.2937_57819	re14.peg.3606_99435	re15.peg.5330_107981	re17.peg.4140_123046	re18.peg.3761_129596	re19.peg.3547_136093	re20.peg.5691_144465	re22.peg.4321_157113	re04.peg.1032_22337	re10.peg.2609_64184	re11.peg.4873_75597	re12.peg.7293_86779	re13.peg.4126_92758	re16.peg.3563_115497	re21.peg.4716_150792	rq23.peg.3803_170382	rq24.peg.4864_178202	rq25.peg.5125_184921	rq26.peg.4018_190542	rq27.peg.4174_197978	rq28.peg.5367_205592	re30.peg.2389_162058	rq29.peg.2930_211650
432	group_12569	Sulfate adenylyltransferase subunit 2	30	30	1	312	19397				686	953	936	re01.peg.1747_1747	re02.peg.5584_12765	re03.peg.5138_19364	re05.peg.4909_33372	re06.peg.5375_40402	re07.peg.4270_46483	re08.peg.4049_52434	re09.peg.2941_57823	re14.peg.3602_99431	re15.peg.5324_107975	re17.peg.4135_123041	re18.peg.3757_129592	re19.peg.3543_136089	re20.peg.5687_144461	re22.peg.4317_157109	re04.peg.1036_22341	re10.peg.2617_64192	re11.peg.4878_75602	re12.peg.7286_86772	re13.peg.4131_92763	re16.peg.3558_115492	re21.peg.4720_150796	rq23.peg.3799_170378	rq24.peg.4859_178197	rq25.peg.5121_184917	rq26.peg.4013_190537	rq27.peg.4169_197973	rq28.peg.5371_205596	re30.peg.2384_162053	rq29.peg.2935_211655
433	group_12571	Phosphoadenylyl-sulfate reductase [thioredoxin] / Adenylyl-sulfate reductase [thioredoxin]	30	30	1	312	19396				617	743	724	re01.peg.1748_1748	re02.peg.5583_12764	re03.peg.5137_19363	re05.peg.4910_33373	re06.peg.5374_40401	re07.peg.4271_46484	re08.peg.4050_52435	re09.peg.2942_57824	re14.peg.3601_99430	re15.peg.5323_107974	re17.peg.4134_123040	re18.peg.3756_129591	re19.peg.3542_136088	re20.peg.5686_144460	re22.peg.4316_157108	re04.peg.1037_22342	re10.peg.2618_64193	re11.peg.4879_75603	re12.peg.7285_86771	re13.peg.4132_92764	re16.peg.3557_115491	re21.peg.4721_150797	rq23.peg.3798_170377	rq24.peg.4858_178196	rq25.peg.5120_184916	rq26.peg.4012_190536	rq27.peg.4168_197972	rq28.peg.5372_205597	re30.peg.2383_162052	rq29.peg.2936_211656
434	group_12572	Potassium-transporting ATPase C chain (TC 3.A.3.7.1)	30	30	1	312	19363				551	650	646	re01.peg.1771_1771	re02.peg.5555_12736	re03.peg.5115_19341	re05.peg.4934_33397	re06.peg.5352_40379	re07.peg.4293_46506	re08.peg.4072_52457	re09.peg.2964_57846	re14.peg.3579_99408	re15.peg.5289_107940	re17.peg.4112_123018	re18.peg.3734_129569	re19.peg.3520_136066	re20.peg.5664_144438	re22.peg.4294_157086	re04.peg.1059_22364	re10.peg.2650_64225	re11.peg.4910_75634	re12.peg.5805_85291	re13.peg.4154_92786	re16.peg.3535_115469	re21.peg.4743_150819	rq23.peg.3776_170355	rq24.peg.4836_178174	rq25.peg.5098_184894	rq26.peg.3990_190514	rq27.peg.4146_197950	rq28.peg.5403_205628	re30.peg.2360_162029	rq29.peg.2958_211678
435	group_12578	Malonyl CoA-acyl carrier protein transacylase	30	30	1	312	19232				341	908	879	re01.peg.1829_1829	re02.peg.5146_12327	re03.peg.5060_19286	re05.peg.6015_34478	re06.peg.5297_40324	re07.peg.4353_46566	re08.peg.3167_51552	re09.peg.3023_57905	re14.peg.3520_99349	re15.peg.5215_107866	re17.peg.5773_124679	re18.peg.5480_131315	re19.peg.3461_136007	re20.peg.5609_144383	re22.peg.4238_157030	re04.peg.1118_22423	re10.peg.8291_69866	re11.peg.2497_73221	re12.peg.5274_84760	re13.peg.4210_92842	re16.peg.420_112354	re21.peg.1921_147997	rq23.peg.3721_170300	rq24.peg.4772_178110	rq25.peg.4789_184585	rq26.peg.3934_190458	rq27.peg.4067_197871	rq28.peg.2672_202898	re30.peg.2303_161972	rq29.peg.5862_214582
436	group_12586	Octanoate-[acyl-carrier-protein]-protein-N-octanoyltransferase	30	30	1	312	19065				677	794	759	re01.peg.1894_1894	re02.peg.5012_12193	re03.peg.4980_19206	re05.peg.6071_34534	re06.peg.5243_40270	re07.peg.4409_46622	re08.peg.3221_51606	re09.peg.3095_57977	re14.peg.3465_99294	re15.peg.5144_107795	re17.peg.5005_123911	re18.peg.5537_131372	re19.peg.3402_135948	re20.peg.5554_144328	re22.peg.4181_156973	re04.peg.1171_22476	re10.peg.7166_68741	re11.peg.2560_73284	re12.peg.6432_85918	re13.peg.2607_91239	re16.peg.6691_118625	re21.peg.1868_147944	rq23.peg.3668_170247	rq24.peg.4300_177638	rq25.peg.4842_184638	rq26.peg.6034_192558	rq27.peg.4014_197818	rq28.peg.2617_202843	re30.peg.2199_161868	rq29.peg.2344_211064
437	group_12597	1-acyl-sn-glycerol-3-phosphate acyltransferase	30	30	1	312	19002				806	1094	819	re01.peg.1934_1934	re02.peg.4963_12144	re03.peg.4940_19166	re05.peg.4268_32731	re06.peg.5203_40230	re07.peg.4450_46663	re08.peg.3262_51647	re09.peg.3136_58018	re14.peg.3425_99254	re15.peg.5094_107745	re17.peg.4963_123869	re18.peg.5307_131142	re19.peg.3361_135907	re20.peg.5512_144286	re22.peg.4140_156932	re04.peg.1214_22519	re10.peg.6704_68279	re11.peg.4401_75125	re12.peg.7910_87396	re13.peg.2649_91281	re16.peg.6733_118667	re21.peg.2063_148139	rq23.peg.3625_170204	rq24.peg.4259_177597	rq25.peg.4885_184681	rq26.peg.5993_192517	rq27.peg.3971_197775	rq28.peg.2570_202796	re30.peg.2158_161827	rq29.peg.2386_211106
438	group_12598	FIG00994909: hypothetical protein	30	30	1	312	19001				248	491	480	re01.peg.1935_1935	re02.peg.4962_12143	re03.peg.4939_19165	re05.peg.4267_32730	re06.peg.5202_40229	re07.peg.4451_46664	re08.peg.3263_51648	re09.peg.3137_58019	re14.peg.3424_99253	re15.peg.5093_107744	re17.peg.4962_123868	re18.peg.5306_131141	re19.peg.3360_135906	re20.peg.5511_144285	re22.peg.4139_156931	re04.peg.1215_22520	re10.peg.6705_68280	re11.peg.4400_75124	re12.peg.7911_87397	re13.peg.2650_91282	re16.peg.6734_118668	re21.peg.2062_148138	rq23.peg.3624_170203	rq24.peg.4258_177596	rq25.peg.4886_184682	rq26.peg.5992_192516	rq27.peg.3970_197774	rq28.peg.2569_202795	re30.peg.2157_161826	rq29.peg.2387_211107
439	group_12599	rRNA small subunit methyltransferase H	30	30	1	312	18963				566	1037	997	re01.peg.1952_1952	re02.peg.6139_13320	re03.peg.4921_19147	re05.peg.4248_32711	re06.peg.5186_40213	re07.peg.4468_46681	re08.peg.3280_51665	re09.peg.3155_58037	re14.peg.3407_99236	re15.peg.5071_107722	re17.peg.4944_123850	re18.peg.5289_131124	re19.peg.3343_135889	re20.peg.5491_144265	re22.peg.4120_156912	re04.peg.1233_22538	re10.peg.6727_68302	re11.peg.4375_75099	re12.peg.7535_87021	re13.peg.2669_91301	re16.peg.6753_118687	re21.peg.2043_148119	rq23.peg.3605_170184	rq24.peg.4239_177577	rq25.peg.4904_184700	rq26.peg.5973_192497	rq27.peg.3951_197755	rq28.peg.2550_202776	re30.peg.2139_161808	rq29.peg.2405_211125
440	group_12601	Cell division protein FtsQ	30	30	1	312	18945				578	839	773	re01.peg.1964_1964	re02.peg.6157_13338	re03.peg.4911_19137	re05.peg.4237_32700	re06.peg.5175_40202	re07.peg.4478_46691	re08.peg.3291_51676	re09.peg.3165_58047	re14.peg.3396_99225	re15.peg.5057_107708	re17.peg.4934_123840	re18.peg.5278_131113	re19.peg.3333_135879	re20.peg.5481_144255	re22.peg.4110_156902	re04.peg.1243_22548	re10.peg.8877_70452	re11.peg.4361_75085	re12.peg.8817_88303	re13.peg.2679_91311	re16.peg.6763_118697	re21.peg.2033_148109	rq23.peg.3595_170174	rq24.peg.4229_177567	rq25.peg.4914_184710	rq26.peg.5963_192487	rq27.peg.3941_197745	rq28.peg.2536_202762	re30.peg.2129_161798	rq29.peg.4271_212991
441	group_12602	FIG055075: Possibly a cell division protein antigen 84 in Mycobacteria	30	30	1	312	18932				332	827	798	re01.peg.1971_1971	re02.peg.6163_13344	re03.peg.4905_19131	re05.peg.4231_32694	re06.peg.5169_40196	re07.peg.4484_46697	re08.peg.3298_51683	re09.peg.3171_58053	re14.peg.3390_99219	re15.peg.5045_107696	re17.peg.4928_123834	re18.peg.5272_131107	re19.peg.3327_135873	re20.peg.5475_144249	re22.peg.4103_156895	re04.peg.1249_22554	re10.peg.4924_66499	re11.peg.6659_77383	re12.peg.884_80370	re13.peg.2685_91317	re16.peg.6769_118703	re21.peg.2026_148102	rq23.peg.3588_170167	rq24.peg.4222_177560	rq25.peg.4920_184716	rq26.peg.5956_192480	rq27.peg.3935_197739	rq28.peg.2530_202756	re30.peg.2123_161792	rq29.peg.4265_212985
442	group_12604	Pyruvate oxidase [ubiquinone cytochrome]	30	30	1	312	18891				656	1775	1737	re01.peg.1988_1988	re02.peg.6180_13361	re03.peg.480_14706	re05.peg.4215_32678	re06.peg.5153_40180	re07.peg.4500_46713	re08.peg.3314_51699	re09.peg.3187_58069	re14.peg.3374_99203	re15.peg.5023_107674	re17.peg.4911_123817	re18.peg.5255_131090	re19.peg.3311_135857	re20.peg.5459_144233	re22.peg.4087_156879	re04.peg.1266_22571	re10.peg.4949_66524	re11.peg.6640_77364	re12.peg.910_80396	re13.peg.2702_91334	re16.peg.6786_118720	re21.peg.2009_148085	rq23.peg.3571_170150	rq24.peg.4205_177543	rq25.peg.4937_184733	rq26.peg.5939_192463	rq27.peg.3910_197714	rq28.peg.2512_202738	re30.peg.2106_161775	rq29.peg.4248_212968
443	group_12610	possible cell wall protein	30	30	1	312	18832				125	374	365	re01.peg.2025_2025	re02.peg.6221_13402	re03.peg.6840_21066	re05.peg.4178_32641	re06.peg.5116_40143	re07.peg.4536_46749	re08.peg.3352_51737	re09.peg.3223_58105	re14.peg.3338_99167	re15.peg.4967_107618	re17.peg.5072_123978	re18.peg.4394_130229	re19.peg.3275_135821	re20.peg.5423_144197	re22.peg.4050_156842	re04.peg.4453_25758	re10.peg.4997_66572	re11.peg.6303_77027	re12.peg.964_80450	re13.peg.2737_91369	re16.peg.3460_115394	re21.peg.1974_148050	rq23.peg.3535_170114	rq24.peg.4169_177507	rq25.peg.4974_184770	rq26.peg.5903_192427	rq27.peg.3875_197679	rq28.peg.6328_206553	re30.peg.2071_161740	rq29.peg.4213_212933
444	group_12611	FIG01000794: hypothetical protein	30	30	1	312	18830				572	689	576	re01.peg.2027_2027	re02.peg.6223_13404	re03.peg.6838_21064	re05.peg.4176_32639	re06.peg.5114_40141	re07.peg.4538_46751	re08.peg.3354_51739	re09.peg.3225_58107	re14.peg.3336_99165	re15.peg.4964_107615	re17.peg.5070_123976	re18.peg.4392_130227	re19.peg.3273_135819	re20.peg.5421_144195	re22.peg.4048_156840	re04.peg.4455_25760	re10.peg.4999_66574	re11.peg.6301_77025	re12.peg.966_80452	re13.peg.2739_91371	re16.peg.3458_115392	re21.peg.1972_148048	rq23.peg.3533_170112	rq24.peg.4167_177505	rq25.peg.4976_184772	rq26.peg.5901_192425	rq27.peg.3873_197677	rq28.peg.6326_206551	re30.peg.2069_161738	rq29.peg.4211_212931
445	group_12612	Phosphoribosylformimino-5-aminoimidazole carboxamide ribotide isomerase / Acting phosphoribosylanthranilate isomerase	30	30	1	312	20320				593	782	680	re01.peg.2077_2077	re02.peg.6512_13693	re03.peg.6786_21012	re05.peg.4123_32586	re06.peg.5064_40091	re07.peg.5731_47944	re08.peg.5679_54064	re09.peg.3274_58156	re14.peg.3286_99115	re15.peg.4887_107538	re17.peg.5021_123927	re18.peg.4338_130173	re19.peg.3222_135768	re20.peg.5370_144144	re22.peg.3998_156790	re04.peg.4503_25808	re10.peg.8782_70357	re11.peg.6801_77525	re12.peg.1038_80524	re13.peg.6022_94654	re16.peg.2837_114771	re21.peg.2657_148733	rq23.peg.3485_170064	rq24.peg.6116_179454	rq25.peg.5026_184822	rq26.peg.6598_193122	rq27.peg.3825_197629	rq28.peg.4323_204549	re30.peg.2011_161680	rq29.peg.3747_212467
446	group_12614	NAD kinase	30	30	1	312	25693				383	947	922	re01.peg.2098_2098	re02.peg.4776_11957	re03.peg.351_14577	re05.peg.6349_34812	re06.peg.4540_39567	re07.peg.3775_45988	re08.peg.6123_54508	re09.peg.3406_58288	re14.peg.3153_98982	re15.peg.4683_107334	re17.peg.5642_124548	re18.peg.6345_132180	re19.peg.3088_135634	re20.peg.5165_143939	re22.peg.3806_156598	re04.peg.5062_26367	re10.peg.8703_70278	re11.peg.7896_78620	re12.peg.8617_88103	re13.peg.3656_92288	re16.peg.666_112600	re21.peg.6258_152334	rq23.peg.3347_169926	rq24.peg.6153_179491	rq25.peg.2017_181813	rq26.peg.3019_189543	rq27.peg.4413_198217	rq28.peg.5904_206129	re30.peg.1860_161529	rq29.peg.3569_212289
447	group_12621	CDP-diacylglycerol--glycerol-3-phosphate 3-phosphatidyltransferase	30	30	1	312	25595				599	650	633	re01.peg.2135_2135	re02.peg.4732_11913	re03.peg.314_14540	re05.peg.4719_33182	re06.peg.4509_39536	re07.peg.3738_45951	re08.peg.5847_54232	re09.peg.3452_58334	re14.peg.3114_98943	re15.peg.4632_107283	re17.peg.5681_124587	re18.peg.4049_129884	re19.peg.3051_135597	re20.peg.5131_143905	re22.peg.3769_156561	re04.peg.5026_26331	re10.peg.4704_66279	re11.peg.6865_77589	re12.peg.5618_85104	re13.peg.3694_92326	re16.peg.4467_116401	re21.peg.6307_152383	rq23.peg.3311_169890	rq24.peg.2711_176049	rq25.peg.2051_181847	rq26.peg.2983_189507	rq27.peg.4448_198252	rq28.peg.5946_206171	re30.peg.1825_161494	rq29.peg.3616_212336
448	group_12624	FIG00994727: hypothetical protein	30	30	1	312	25571				1250	1250	1250	re01.peg.2148_2148	re02.peg.4716_11897	re03.peg.301_14527	re05.peg.4706_33169	re06.peg.4496_39523	re07.peg.3725_45938	re08.peg.5860_54245	re09.peg.3465_58347	re14.peg.3100_98929	re15.peg.4610_107261	re17.peg.5694_124600	re18.peg.4035_129870	re19.peg.3038_135584	re20.peg.5118_143892	re22.peg.3756_156548	re04.peg.5013_26318	re10.peg.4686_66261	re11.peg.5409_76133	re12.peg.6681_86167	re13.peg.3707_92339	re16.peg.4454_116388	re21.peg.6294_152370	rq23.peg.3298_169877	rq24.peg.2698_176036	rq25.peg.2064_181860	rq26.peg.2970_189494	rq27.peg.4461_198265	rq28.peg.5960_206185	re30.peg.1812_161481	rq29.peg.3629_212349
449	group_12625	FIG016551: Putative peptidase	30	30	1	312	25567				638	1352	1328	re01.peg.2151_2151	re02.peg.4712_11893	re03.peg.298_14524	re05.peg.4703_33166	re06.peg.4493_39520	re07.peg.3722_45935	re08.peg.5863_54248	re09.peg.3468_58350	re14.peg.3097_98926	re15.peg.4607_107258	re17.peg.5697_124603	re18.peg.4032_129867	re19.peg.3035_135581	re20.peg.5115_143889	re22.peg.3753_156545	re04.peg.5010_26315	re10.peg.4683_66258	re11.peg.5414_76138	re12.peg.6676_86162	re13.peg.3710_92342	re16.peg.4451_116385	re21.peg.6291_152367	rq23.peg.3295_169874	rq24.peg.2695_176033	rq25.peg.2067_181863	rq26.peg.2967_189491	rq27.peg.4464_198268	rq28.peg.5963_206188	re30.peg.1809_161478	rq29.peg.4397_213117
450	group_12629	Undecaprenyl-diphosphatase	30	30	1	312	25549				470	848	820	re01.peg.2162_2162	re02.peg.4695_11876	re03.peg.287_14513	re05.peg.4692_33155	re06.peg.4482_39509	re07.peg.3711_45924	re08.peg.5874_54259	re09.peg.3479_58361	re14.peg.3086_98915	re15.peg.4591_107242	re17.peg.5708_124614	re18.peg.4020_129855	re19.peg.3024_135570	re20.peg.5104_143878	re22.peg.3742_156534	re04.peg.4999_26304	re10.peg.4670_66245	re11.peg.5426_76150	re12.peg.8153_87639	re13.peg.3721_92353	re16.peg.4440_116374	re21.peg.6280_152356	rq23.peg.3284_169863	rq24.peg.2684_176022	rq25.peg.2078_181874	rq26.peg.2956_189480	rq27.peg.4475_198279	rq28.peg.5977_206202	re30.peg.1798_161467	rq29.peg.4386_213106
451	group_12633	Phosphoribosyl-ATP pyrophosphatase	30	30	1	312	25507				263	1238	299	re01.peg.2179_2179	re02.peg.4671_11852	re03.peg.4262_18488	re05.peg.4673_33136	re06.peg.4464_39491	re07.peg.3693_45906	re08.peg.2329_50714	re09.peg.3497_58379	re14.peg.3068_98897	re15.peg.4561_107212	re17.peg.3604_122510	re18.peg.4002_129837	re19.peg.3007_135553	re20.peg.5086_143860	re22.peg.3724_156516	re04.peg.1837_23142	re10.peg.8211_69786	re11.peg.7033_77757	re12.peg.6746_86232	re13.peg.3739_92371	re16.peg.4422_116356	re21.peg.5188_151264	rq23.peg.3266_169845	rq24.peg.2667_176005	rq25.peg.2095_181891	rq26.peg.2939_189463	rq27.peg.4492_198296	rq28.peg.5_200232	re30.peg.1781_161450	rq29.peg.2239_210959
452	group_12635	FIG00994474: hypothetical protein	30	30	1	312	25500				524	818	534	re01.peg.2184_2184	re02.peg.4666_11847	re03.peg.4257_18483	re05.peg.4667_33130	re06.peg.4459_39486	re07.peg.3688_45901	re08.peg.2324_50709	re09.peg.3502_58384	re14.peg.3063_98892	re15.peg.4552_107203	re17.peg.3609_122515	re18.peg.3997_129832	re19.peg.3002_135548	re20.peg.5081_143855	re22.peg.3719_156511	re04.peg.1832_23137	re10.peg.8216_69791	re11.peg.7027_77751	re12.peg.6752_86238	re13.peg.3744_92376	re16.peg.4417_116351	re21.peg.5183_151259	rq23.peg.3261_169840	rq24.peg.2662_176000	rq25.peg.2100_181896	rq26.peg.2934_189458	rq27.peg.4497_198301	rq28.peg.11_200238	re30.peg.1776_161445	rq29.peg.2234_210954
453	group_12639	FIG00995551: hypothetical protein	30	30	1	312	25337				602	782	776	re01.peg.2251_2251	re02.peg.4372_11553	re03.peg.4186_18412	re05.peg.4597_33060	re06.peg.3952_38979	re07.peg.3616_45829	re08.peg.2253_50638	re09.peg.3573_58455	re14.peg.2991_98820	re15.peg.4442_107093	re17.peg.3681_122587	re18.peg.3927_129762	re19.peg.2931_135477	re20.peg.5009_143783	re22.peg.3647_156439	re04.peg.1759_23064	re10.peg.5989_67564	re11.peg.4751_75475	re12.peg.4441_83927	re13.peg.3531_92163	re16.peg.4346_116280	re21.peg.5111_151187	rq23.peg.3189_169768	rq24.peg.1990_175328	rq25.peg.2172_181968	rq26.peg.5522_192046	rq27.peg.4566_198370	rq28.peg.97_200324	re30.peg.1704_161373	rq29.peg.2846_211566
454	group_12641	OsmC/Ohr family protein	30	30	1	312	25298				194	476	445	re01.peg.2268_2268	re02.peg.4347_11528	re03.peg.4170_18396	re05.peg.4578_33041	re06.peg.3968_38995	re07.peg.3600_45813	re08.peg.2237_50622	re09.peg.3589_58471	re14.peg.2975_98804	re15.peg.4421_107072	re17.peg.3697_122603	re18.peg.3009_128844	re19.peg.2915_135461	re20.peg.4993_143767	re22.peg.3631_156423	re04.peg.1743_23048	re10.peg.4242_65817	re11.peg.5957_76681	re12.peg.8568_88054	re13.peg.3515_92147	re16.peg.2504_114438	re21.peg.5095_151171	rq23.peg.3173_169752	rq24.peg.2006_175344	rq25.peg.2188_181984	rq26.peg.5538_192062	rq27.peg.4582_198386	rq28.peg.119_200346	re30.peg.1688_161357	rq29.peg.1070_209790
455	group_12643	Heme O synthase protoheme IX farnesyltransferase COX10-CtaB	30	30	1	312	25183				305	905	821	re01.peg.2316_2316	re02.peg.4290_11471	re03.peg.4122_18348	re05.peg.4528_32991	re06.peg.4027_39054	re07.peg.3552_45765	re08.peg.2189_50574	re09.peg.3637_58519	re14.peg.2927_98756	re15.peg.4345_106996	re17.peg.3745_122651	re18.peg.2958_128793	re19.peg.2867_135413	re20.peg.4945_143719	re22.peg.3583_156375	re04.peg.1695_23000	re10.peg.7569_69144	re11.peg.7185_77909	re12.peg.6808_86294	re13.peg.3468_92100	re16.peg.346_112280	re21.peg.5047_151123	rq23.peg.3125_169704	rq24.peg.2053_175391	rq25.peg.2275_182071	rq26.peg.5589_192113	rq27.peg.4631_198435	rq28.peg.175_200402	re30.peg.1637_161306	rq29.peg.1118_209838
456	group_12644	OpcA an allosteric effector of glucose-6-phosphate dehydrogenase actinobacterial	30	30	1	312	25174				542	908	884	re01.peg.2321_2321	re02.peg.4286_11467	re03.peg.4118_18344	re05.peg.4524_32987	re06.peg.4031_39058	re07.peg.3547_45760	re08.peg.2184_50569	re09.peg.3641_58523	re14.peg.2923_98752	re15.peg.4338_106989	re17.peg.3749_122655	re18.peg.2954_128789	re19.peg.2863_135409	re20.peg.4941_143715	re22.peg.3578_156370	re04.peg.1691_22996	re10.peg.7564_69139	re11.peg.7189_77913	re12.peg.6816_86302	re13.peg.3464_92096	re16.peg.350_112284	re21.peg.5043_151119	rq23.peg.3121_169700	rq24.peg.2057_175395	rq25.peg.2279_182075	rq26.peg.5593_192117	rq27.peg.4635_198439	rq28.peg.181_200408	re30.peg.1633_161302	rq29.peg.1122_209842
457	group_12645	Ribulose-phosphate 3-epimerase	30	30	1	312	25114				278	671	651	re01.peg.2346_2346	re02.peg.4259_11440	re03.peg.4095_18321	re05.peg.4496_32959	re06.peg.4055_39082	re07.peg.3524_45737	re08.peg.2161_50546	re09.peg.3663_58545	re14.peg.2900_98729	re15.peg.4307_106958	re17.peg.3775_122681	re18.peg.2929_128764	re19.peg.2839_135385	re20.peg.4917_143691	re22.peg.3555_156347	re04.peg.1665_22970	re10.peg.8830_70405	re11.peg.8173_78897	re12.peg.8714_88200	re13.peg.3438_92070	re16.peg.376_112310	re21.peg.5016_151092	rq23.peg.3096_169675	rq24.peg.2084_175422	rq25.peg.2305_182101	rq26.peg.5620_192144	rq27.peg.4660_198464	rq28.peg.213_200440	re30.peg.1607_161276	rq29.peg.1149_209869
458	group_12647	FIG024784: Integral membrane protein related to pyrimidine synthesis	30	30	1	312	25078				551	581	570	re01.peg.2363_2363	re02.peg.4239_11420	re03.peg.4078_18304	re05.peg.4478_32941	re06.peg.4072_39099	re07.peg.3507_45720	re08.peg.2144_50529	re09.peg.3680_58562	re14.peg.2883_98712	re15.peg.4284_106935	re17.peg.3792_122698	re18.peg.2911_128746	re19.peg.2822_135368	re20.peg.4900_143674	re22.peg.3538_156330	re04.peg.1648_22953	re10.peg.8371_69946	re11.peg.7974_78698	re12.peg.7950_87436	re13.peg.3420_92052	re16.peg.394_112328	re21.peg.4998_151074	rq23.peg.3078_169657	rq24.peg.2103_175441	rq25.peg.2323_182119	rq26.peg.5637_192161	rq27.peg.4677_198481	rq28.peg.236_200463	re30.peg.1589_161258	rq29.peg.1167_209887
459	group_12648	Uracil phosphoribosyltransferase / Pyrimidine operon regulatory protein PyrR	30	30	1	312	25072				545	641	636	re01.peg.2366_2366	re02.peg.4234_11415	re03.peg.4075_18301	re05.peg.4475_32938	re06.peg.4075_39102	re07.peg.3504_45717	re08.peg.2141_50526	re09.peg.3683_58565	re14.peg.2880_98709	re15.peg.4278_106929	re17.peg.3795_122701	re18.peg.2908_128743	re19.peg.2819_135365	re20.peg.4897_143671	re22.peg.3535_156327	re04.peg.1645_22950	re10.peg.8093_69668	re11.peg.7749_78473	re12.peg.8445_87931	re13.peg.3417_92049	re16.peg.397_112331	re21.peg.4995_151071	rq23.peg.3075_169654	rq24.peg.2106_175444	rq25.peg.2326_182122	rq26.peg.5640_192164	rq27.peg.4680_198484	rq28.peg.240_200467	re30.peg.1586_161255	rq29.peg.1170_209890
460	group_12649	3-dehydroquinate synthase	30	30	1	312	25064				569	1109	1090	re01.peg.2372_2372	re02.peg.4228_11409	re03.peg.4069_18295	re05.peg.4469_32932	re06.peg.4081_39108	re07.peg.3498_45711	re08.peg.2135_50520	re09.peg.3689_58571	re14.peg.2874_98703	re15.peg.4269_106920	re17.peg.3801_122707	re18.peg.2902_128737	re19.peg.2813_135359	re20.peg.4891_143665	re22.peg.3529_156321	re04.peg.1639_22944	re10.peg.8100_69675	re11.peg.7755_78479	re12.peg.8437_87923	re13.peg.3411_92043	re16.peg.403_112337	re21.peg.4989_151065	rq23.peg.3069_169648	rq24.peg.2112_175450	rq25.peg.2332_182128	rq26.peg.5646_192170	rq27.peg.4686_198490	rq28.peg.246_200473	re30.peg.1580_161249	rq29.peg.1176_209896
461	group_12652	FIG01001963: hypothetical protein	30	30	1	312	25023				689	1571	1541	re01.peg.2396_2396	re02.peg.4202_11383	re03.peg.4046_18272	re05.peg.4446_32909	re06.peg.4103_39130	re07.peg.3476_45689	re08.peg.2113_50498	re09.peg.3713_58595	re14.peg.2852_98681	re15.peg.4234_106885	re17.peg.3824_122730	re18.peg.2878_128713	re19.peg.2790_135336	re20.peg.4869_143643	re22.peg.3506_156298	re04.peg.1616_22921	re10.peg.6618_68193	re11.peg.7568_78292	re12.peg.7408_86894	re13.peg.3388_92020	re16.peg.2143_114077	re21.peg.4965_151041	rq23.peg.3046_169625	rq24.peg.2137_175475	rq25.peg.2356_182152	rq26.peg.5697_192221	rq27.peg.4709_198513	rq28.peg.271_200498	re30.peg.1558_161227	rq29.peg.1199_209919
462	group_12658	Alcohol dehydrogenase	30	30	1	312	3948				803	1274	1255	re01.peg.2489_2489	re02.peg.6292_13473	re03.peg.6067_20293	re05.peg.3776_32239	re06.peg.879_35907	re07.peg.2709_44922	re08.peg.3607_51992	re09.peg.4741_59623	re14.peg.1816_97645	re15.peg.2697_105348	re17.peg.1785_120691	re18.peg.5144_130979	re19.peg.1761_134307	re20.peg.60_138834	re22.peg.2283_155075	re04.peg.648_21953	re10.peg.6149_67724	re11.peg.5359_76083	re12.peg.5709_85195	re13.peg.315_88947	re16.peg.5610_117544	re21.peg.2202_148278	rq23.peg.1865_168444	rq24.peg.4508_177846	rq25.peg.5957_185753	rq26.peg.2450_188974	rq27.peg.68_193872	rq28.peg.1541_201767	re30.peg.6108_165777	rq29.peg.1352_210072
463	group_12662	possible transcriptional regulator MarR family	30	30	1	312	4010				236	509	463	re01.peg.2525_2525	re02.peg.4562_11743	re03.peg.6032_20258	re05.peg.3739_32202	re06.peg.914_35942	re07.peg.2674_44887	re08.peg.3642_52027	re09.peg.4776_59658	re14.peg.1781_97610	re15.peg.2652_105303	re17.peg.1820_120726	re18.peg.5179_131014	re19.peg.1726_134272	re20.peg.95_138869	re22.peg.2248_155040	re04.peg.684_21989	re10.peg.6777_68352	re11.peg.4051_74775	re12.peg.5553_85039	re13.peg.280_88912	re16.peg.5574_117508	re21.peg.2237_148313	rq23.peg.1830_168409	rq24.peg.4544_177882	rq25.peg.2650_182446	rq26.peg.2486_189010	rq27.peg.103_193907	rq28.peg.1579_201805	re30.peg.6073_165742	rq29.peg.1387_210107
464	group_12664	MCE-family protein Mce1A	30	30	1	312	4042				1220	1361	1351	re01.peg.2543_2543	re02.peg.4542_11723	re03.peg.6013_20239	re05.peg.3718_32181	re06.peg.932_35960	re07.peg.2656_44869	re08.peg.3662_52047	re09.peg.4794_59676	re14.peg.1763_97592	re15.peg.2626_105277	re17.peg.1839_120745	re18.peg.5199_131034	re19.peg.1708_134254	re20.peg.113_138887	re22.peg.2230_155022	re04.peg.702_22007	re10.peg.6753_68328	re11.peg.4076_74800	re12.peg.5531_85017	re13.peg.261_88893	re16.peg.5556_117490	re21.peg.2256_148332	rq23.peg.1811_168390	rq24.peg.4563_177901	rq25.peg.2632_182428	rq26.peg.2504_189028	rq27.peg.121_193925	rq28.peg.7372_207597	re30.peg.6055_165724	rq29.peg.1405_210125
465	group_12665	Methionine ABC transporter ATP-binding protein	30	30	1	312	4047				266	1139	1052	re01.peg.2546_2546	re02.peg.4539_11720	re03.peg.6010_20236	re05.peg.3715_32178	re06.peg.935_35963	re07.peg.2653_44866	re08.peg.3665_52050	re09.peg.4797_59679	re14.peg.1760_97589	re15.peg.2621_105272	re17.peg.1842_120748	re18.peg.5203_131038	re19.peg.1705_134251	re20.peg.116_138890	re22.peg.2227_155019	re04.peg.705_22010	re10.peg.6750_68325	re11.peg.4081_74805	re12.peg.5527_85013	re13.peg.258_88890	re16.peg.5553_117487	re21.peg.2259_148335	rq23.peg.1808_168387	rq24.peg.4566_177904	rq25.peg.2629_182425	rq26.peg.2507_189031	rq27.peg.124_193928	rq28.peg.7368_207593	re30.peg.6052_165721	rq29.peg.1408_210128
466	group_12667	Putative uncharacterized protein BCG_1787	30	30	1	312	4051				692	725	693	re01.peg.2549_2549	re02.peg.4535_11716	re03.peg.1513_15739	re05.peg.3710_32173	re06.peg.940_35968	re07.peg.2648_44861	re08.peg.3669_52054	re09.peg.4802_59684	re14.peg.1756_97585	re15.peg.2617_105268	re17.peg.1847_120753	re18.peg.5206_131041	re19.peg.1701_134247	re20.peg.120_138894	re22.peg.2223_155015	re04.peg.709_22014	re10.peg.6746_68321	re11.peg.4083_74807	re12.peg.5525_85011	re13.peg.254_88886	re16.peg.5549_117483	re21.peg.2263_148339	rq23.peg.1805_168384	rq24.peg.4570_177908	rq25.peg.2625_182421	rq26.peg.2511_189035	rq27.peg.128_193932	rq28.peg.7364_207589	re30.peg.6048_165717	rq29.peg.1412_210132
467	group_12668	LSU ribosomal protein L1p (L10Ae)	30	30	1	312	4055				407	719	695	re01.peg.2550_2550	re02.peg.4534_11715	re03.peg.1514_15740	re05.peg.3709_32172	re06.peg.941_35969	re07.peg.2647_44860	re08.peg.3670_52055	re09.peg.4803_59685	re14.peg.1755_97584	re15.peg.2615_105266	re17.peg.1848_120754	re18.peg.5207_131042	re19.peg.1700_134246	re20.peg.121_138895	re22.peg.2222_155014	re04.peg.710_22015	re10.peg.6744_68319	re11.peg.4084_74808	re12.peg.5523_85009	re13.peg.253_88885	re16.peg.5548_117482	re21.peg.2264_148340	rq23.peg.1804_168383	rq24.peg.4571_177909	rq25.peg.2624_182420	rq26.peg.2512_189036	rq27.peg.129_193933	rq28.peg.7363_207588	re30.peg.6047_165716	rq29.peg.1413_210133
468	group_12671	(3R)-hydroxyacyl-ACP dehydratase subunit HadA	30	30	1	312	4061				317	554	513	re01.peg.2555_2555	re02.peg.4529_11710	re03.peg.1520_15746	re05.peg.3704_32167	re06.peg.947_35975	re07.peg.2641_44854	re08.peg.3676_52061	re09.peg.4809_59691	re14.peg.1750_97579	re15.peg.2609_105260	re17.peg.1853_120759	re18.peg.5213_131048	re19.peg.1695_134241	re20.peg.127_138901	re22.peg.2217_155009	re04.peg.716_22021	re10.peg.6739_68314	re11.peg.4090_74814	re12.peg.5518_85004	re13.peg.248_88880	re16.peg.5542_117476	re21.peg.2269_148345	rq23.peg.1799_168378	rq24.peg.4576_177914	rq25.peg.2619_182415	rq26.peg.2517_189041	rq27.peg.134_193938	rq28.peg.7358_207583	re30.peg.6042_165711	rq29.peg.1418_210138
469	group_12675	FIG00995300: hypothetical protein	30	30	1	312	4102				311	335	331	re01.peg.2579_2579	re02.peg.4504_11685	re03.peg.1544_15770	re05.peg.3680_32143	re06.peg.971_35999	re07.peg.2617_44830	re08.peg.3700_52085	re09.peg.4833_59715	re14.peg.1726_97555	re15.peg.2576_105227	re17.peg.1877_120783	re18.peg.5238_131073	re19.peg.1671_134217	re20.peg.151_138925	re22.peg.2193_154985	re04.peg.740_22045	re10.peg.8203_69778	re11.peg.4122_74846	re12.peg.8946_88432	re13.peg.224_88856	re16.peg.5518_117452	re21.peg.2293_148369	rq23.peg.1775_168354	rq24.peg.4600_177938	rq25.peg.2595_182391	rq26.peg.2541_189065	rq27.peg.158_193962	rq28.peg.6677_206902	re30.peg.6018_165687	rq29.peg.1442_210162
470	group_12676	FIG00820339: hypothetical protein	30	30	1	312	4104				302	335	303	re01.peg.2580_2580	re02.peg.4503_11684	re03.peg.1545_15771	re05.peg.3679_32142	re06.peg.972_36000	re07.peg.2616_44829	re08.peg.3701_52086	re09.peg.4834_59716	re14.peg.1725_97554	re15.peg.2575_105226	re17.peg.1878_120784	re18.peg.5239_131074	re19.peg.1670_134216	re20.peg.152_138926	re22.peg.2192_154984	re04.peg.741_22046	re10.peg.8204_69779	re11.peg.4123_74847	re12.peg.8945_88431	re13.peg.223_88855	re16.peg.5517_117451	re21.peg.2294_148370	rq23.peg.1774_168353	rq24.peg.4601_177939	rq25.peg.2594_182390	rq26.peg.2542_189066	rq27.peg.159_193963	rq28.peg.6678_206903	re30.peg.6017_165686	rq29.peg.1443_210163
471	group_12677	Methionine ABC transporter ATP-binding protein	30	30	1	312	4109				731	1037	1008	re01.peg.2583_2583	re02.peg.4499_11680	re03.peg.1549_15775	re05.peg.3675_32138	re06.peg.976_36004	re07.peg.2612_44825	re08.peg.3705_52090	re09.peg.4838_59720	re14.peg.1721_97550	re15.peg.2571_105222	re17.peg.1882_120788	re18.peg.5244_131079	re19.peg.1666_134212	re20.peg.156_138930	re22.peg.2188_154980	re04.peg.743_22048	re10.peg.8402_69977	re11.peg.8396_79120	re12.peg.8797_88283	re13.peg.219_88851	re16.peg.5515_117449	re21.peg.2296_148372	rq23.peg.1772_168351	rq24.peg.4605_177943	rq25.peg.2590_182386	rq26.peg.2546_189070	rq27.peg.163_193967	rq28.peg.6680_206905	re30.peg.6013_165682	rq29.peg.1445_210165
472	group_12679	1 4-dihydroxy-2-naphthoate polyprenyltransferase	30	30	1	312	4115				512	869	843	re01.peg.2586_2586	re02.peg.4495_11676	re03.peg.1552_15778	re05.peg.3672_32135	re06.peg.979_36007	re07.peg.2609_44822	re08.peg.3708_52093	re09.peg.4841_59723	re14.peg.1718_97547	re15.peg.2566_105217	re17.peg.1885_120791	re18.peg.4864_130699	re19.peg.1663_134209	re20.peg.159_138933	re22.peg.2185_154977	re04.peg.746_22051	re10.peg.8406_69981	re11.peg.8316_79040	re12.peg.8634_88120	re13.peg.216_88848	re16.peg.5512_117446	re21.peg.2299_148375	rq23.peg.1769_168348	rq24.peg.4608_177946	rq25.peg.2587_182383	rq26.peg.2549_189073	rq27.peg.166_193970	rq28.peg.6683_206908	re30.peg.6010_165679	rq29.peg.1448_210168
473	group_12682	FIG00997523: hypothetical protein	30	30	1	312	4125				188	356	215	re01.peg.2593_2593	re02.peg.4486_11667	re03.peg.1560_15786	re05.peg.3664_32127	6666666.340933.peg.228_35256	re07.peg.2601_44814	re08.peg.3716_52101	re09.peg.4849_59731	re14.peg.1710_97539	re15.peg.2558_105209	re17.peg.1893_120799	re18.peg.4856_130691	re19.peg.1655_134201	re20.peg.167_138941	re22.peg.2177_154969	re04.peg.754_22059	re10.peg.8416_69991	re11.peg.8324_79048	re12.peg.8645_88131	re13.peg.208_88840	re16.peg.5504_117438	re21.peg.2307_148383	rq23.peg.1761_168340	rq24.peg.4616_177954	rq25.peg.2579_182375	rq26.peg.2557_189081	rq27.peg.174_193978	rq28.peg.6691_206916	re30.peg.6002_165671	rq29.peg.1456_210176
474	group_12689	Transcriptional regulator XRE family	30	30	1	312	4308				902	1412	1392	re01.peg.2699_2699	re02.peg.30_7211	re03.peg.1666_15892	re05.peg.3551_32014	6666666.340933.peg.121_35149	re07.peg.2491_44704	re08.peg.4370_52755	re09.peg.4959_59841	re14.peg.1601_97430	re15.peg.2418_105069	re17.peg.1999_120905	re18.peg.4747_130582	re19.peg.1546_134092	re20.peg.275_139049	re22.peg.2068_154860	re04.peg.858_22163	re10.peg.3826_65401	re11.peg.5607_76331	re12.peg.3006_82492	re13.peg.104_88736	re16.peg.5400_117334	re21.peg.1828_147904	rq23.peg.1656_168235	rq24.peg.4327_177665	rq25.peg.2473_182269	rq26.peg.2661_189185	rq27.peg.278_194082	rq28.peg.4589_204815	re30.peg.5898_165567	rq29.peg.5766_214486
475	group_12690	High-affinity branched-chain amino acid transport system permease protein LivH (TC 3.A.1.4.1)	30	30	1	312	4321				857	1517	895	re01.peg.2706_2706	re02.peg.37_7218	re03.peg.1673_15899	re05.peg.3544_32007	6666666.340933.peg.114_35142	re07.peg.2484_44697	re08.peg.4377_52762	re09.peg.4966_59848	re14.peg.1594_97423	re15.peg.2407_105058	re17.peg.2006_120912	re18.peg.4740_130575	re19.peg.1538_134084	re20.peg.282_139056	re22.peg.2061_154853	re04.peg.865_22170	re10.peg.3816_65391	re11.peg.5598_76322	re12.peg.2996_82482	re13.peg.97_88729	re16.peg.5393_117327	re21.peg.1821_147897	rq23.peg.1649_168228	rq24.peg.4334_177672	rq25.peg.2466_182262	rq26.peg.2668_189192	rq27.peg.285_194089	rq28.peg.4596_204822	re30.peg.5891_165560	rq29.peg.5773_214493
476	group_12697	FIG00999840: hypothetical protein	30	30	1	312	24881				449	497	483	re01.peg.2794_2794	re02.peg.5958_13139	re03.peg.4318_18544	re05.peg.4373_32836	re06.peg.1457_36485	re07.peg.5405_47618	re08.peg.2041_50426	re09.peg.3785_58667	re14.peg.2780_98609	re15.peg.4148_106799	re17.peg.4597_123503	re18.peg.2804_128640	re19.peg.2719_135265	re20.peg.4796_143570	re22.peg.3391_156183	re04.peg.5332_26637	re10.peg.5519_67094	re11.peg.5617_76341	re12.peg.5156_84642	re13.peg.1062_89694	re16.peg.3249_115183	re21.peg.2905_148981	rq23.peg.2977_169556	rq24.peg.2208_175546	rq25.peg.3837_183633	rq26.peg.5768_192292	rq27.peg.4829_198633	rq28.peg.346_200572	re30.peg.1487_161156	rq29.peg.4129_212849
477	group_12700	Hemoprotein HemQ essential component of heme biosynthetic pathway in Gram-positive bacteria	30	30	1	312	24844				509	710	682	re01.peg.2808_2808	re02.peg.5941_13122	re03.peg.4332_18558	re05.peg.4358_32821	re06.peg.1444_36472	re07.peg.5418_47631	re08.peg.2027_50412	re09.peg.3799_58681	re14.peg.2766_98595	re15.peg.4129_106780	re17.peg.4610_123516	re18.peg.6464_132299	re19.peg.2706_135252	re20.peg.4783_143557	re22.peg.3378_156170	re04.peg.5345_26650	re10.peg.5536_67111	re11.peg.8023_78747	re12.peg.8118_87604	re13.peg.1076_89708	re16.peg.3235_115169	re21.peg.2891_148967	rq23.peg.2964_169543	rq24.peg.2221_175559	rq25.peg.3823_183619	rq26.peg.5782_192306	rq27.peg.4842_198646	rq28.peg.361_200587	re30.peg.1474_161143	rq29.peg.4116_212836
478	group_12703	FIG00998300: hypothetical protein	30	30	1	312	24800				293	329	295	re01.peg.2831_2831	re02.peg.5912_13093	re03.peg.4354_18580	re05.peg.4334_32797	re06.peg.1421_36449	re07.peg.5440_47653	re08.peg.2005_50390	re09.peg.3823_58705	re14.peg.2743_98572	re15.peg.4089_106740	re17.peg.4634_123540	re18.peg.5811_131646	re19.peg.2683_135229	re20.peg.4762_143536	re22.peg.3356_156148	re04.peg.5367_26672	re10.peg.8791_70366	re11.peg.8385_79109	re12.peg.8721_88207	re13.peg.1097_89729	re16.peg.3209_115143	re21.peg.2867_148943	rq23.peg.2940_169519	rq24.peg.2242_175580	rq25.peg.3801_183597	rq26.peg.5803_192327	rq27.peg.4864_198668	rq28.peg.389_200615	re30.peg.1453_161122	rq29.peg.4093_212813
479	group_12709	FIG00995320: hypothetical protein	30	30	1	312	24743				380	407	404	re01.peg.2866_2866	re02.peg.6801_13982	re03.peg.4389_18615	re05.peg.6337_34800	re06.peg.1386_36414	re07.peg.5475_47688	re08.peg.1971_50356	re09.peg.3859_58741	re14.peg.2709_98538	re15.peg.4042_106693	re17.peg.4668_123574	re18.peg.5777_131612	re19.peg.2648_135194	re20.peg.4728_143502	re22.peg.3321_156113	re04.peg.5401_26706	re10.peg.8721_70296	re11.peg.4325_75049	re12.peg.8659_88145	re13.peg.1130_89762	re16.peg.3176_115110	re21.peg.2394_148470	rq23.peg.2905_169484	rq24.peg.2276_175614	rq25.peg.3766_183562	rq26.peg.6316_192840	rq27.peg.4898_198702	rq28.peg.426_200652	re30.peg.1420_161089	rq29.peg.4059_212779
480	group_12710	FIG022780: hypothetical protein	30	30	1	312	24732				674	698	690	re01.peg.2873_2873	re02.peg.6812_13993	re03.peg.4399_18625	re05.peg.6327_34790	re06.peg.1376_36404	re07.peg.5485_47698	re08.peg.1961_50346	re09.peg.3869_58751	re14.peg.2699_98528	re15.peg.4030_106681	re17.peg.4675_123581	re18.peg.5767_131602	re19.peg.2638_135184	re20.peg.4718_143492	re22.peg.3311_156103	re04.peg.5408_26713	re10.peg.8712_70287	re11.peg.4316_75040	re12.peg.8651_88137	re13.peg.1137_89769	re16.peg.3169_115103	re21.peg.2401_148477	rq23.peg.2898_169477	rq24.peg.2283_175621	rq25.peg.3759_183555	rq26.peg.6323_192847	rq27.peg.4905_198709	rq28.peg.433_200659	re30.peg.1413_161082	rq29.peg.4052_212772
481	group_12711	Butyryl-CoA dehydrogenase	30	30	1	312	24713				1142	1256	1193	re01.peg.2884_2884	re02.peg.5165_12346	re03.peg.5763_19989	re05.peg.5271_33734	re06.peg.1713_36741	re07.peg.5931_48144	re08.peg.1951_50336	re09.peg.3879_58761	re14.peg.2689_98518	re15.peg.4017_106668	re17.peg.2038_120944	re18.peg.4255_130090	re19.peg.2628_135174	re20.peg.4708_143482	re22.peg.3301_156093	re04.peg.1280_22585	re10.peg.8310_69885	re11.peg.4303_75027	re12.peg.8299_87785	re13.peg.5139_93771	re16.peg.3965_115899	re21.peg.2411_148487	rq23.peg.2888_169467	rq24.peg.2293_175631	rq25.peg.3749_183545	rq26.peg.6333_192857	rq27.peg.4915_198719	rq28.peg.3691_203917	re30.peg.1403_161072	rq29.peg.5598_214318
482	group_12713	tRNA-i(6)A37 methylthiotransferase	30	30	1	312	24664				848	1583	1478	re01.peg.2902_2902	re02.peg.5183_12364	re03.peg.5747_19973	re05.peg.5254_33717	re06.peg.1729_36757	re07.peg.2095_44308	re08.peg.1935_50320	re09.peg.3895_58777	re14.peg.2673_98502	re15.peg.3992_106643	re17.peg.2055_120961	re18.peg.4238_130073	re19.peg.2612_135158	re20.peg.4692_143466	re22.peg.3285_156077	re04.peg.1296_22601	re10.peg.1712_63287	re11.peg.7067_77791	re12.peg.3631_83117	re13.peg.5124_93756	re16.peg.4039_115973	re21.peg.2427_148503	rq23.peg.2872_169451	rq24.peg.2310_175648	rq25.peg.3733_183529	rq26.peg.6350_192874	rq27.peg.4932_198736	rq28.peg.3671_203897	re30.peg.1386_161055	rq29.peg.5582_214302
483	group_12718	ATPase component BioM of energizing module of biotin ECF transporter	30	30	1	312	24639				449	680	664	re01.peg.2918_2918	re02.peg.5202_12383	re03.peg.5732_19958	re05.peg.5238_33701	re06.peg.1745_36773	re07.peg.2079_44292	re08.peg.1919_50304	re09.peg.3911_58793	re14.peg.2657_98486	re15.peg.3970_106621	re17.peg.2069_120975	re18.peg.4221_130056	re19.peg.2596_135142	re20.peg.4676_143450	re22.peg.3269_156061	re04.peg.1310_22615	re10.peg.1695_63270	re11.peg.7050_77774	re12.peg.3653_83139	re13.peg.5110_93742	re16.peg.4053_115987	re21.peg.2441_148517	rq23.peg.2858_169437	rq24.peg.2325_175663	rq25.peg.3719_183515	rq26.peg.6364_192888	rq27.peg.4946_198750	rq28.peg.3654_203880	re30.peg.1372_161041	rq29.peg.5568_214288
484	group_12724	FIG01378529: Probable response regulator	30	30	1	312	24556				302	422	418	re01.peg.2935_2935	re02.peg.5220_12401	re03.peg.5715_19941	re05.peg.5220_33683	re06.peg.1762_36790	re07.peg.2062_44275	re08.peg.1902_50287	re09.peg.3928_58810	re14.peg.2640_98469	re15.peg.3947_106598	re17.peg.2086_120992	re18.peg.4203_130038	re19.peg.2579_135125	re20.peg.4659_143433	re22.peg.3251_156043	re04.peg.1328_22633	re10.peg.1668_63243	re11.peg.2307_73031	re12.peg.3677_83163	re13.peg.5093_93725	re16.peg.4070_116004	re21.peg.2458_148534	rq23.peg.2841_169420	rq24.peg.2342_175680	rq25.peg.3702_183498	rq26.peg.6971_193495	rq27.peg.4963_198767	rq28.peg.3634_203860	re30.peg.1355_161024	rq29.peg.5551_214271
485	group_12729	Multimeric flavodoxin WrbA	30	30	1	312	24478				152	452	440	re01.peg.2963_2963	re02.peg.5259_12440	re03.peg.5687_19913	re05.peg.5191_33654	re06.peg.1790_36818	re07.peg.2034_44247	re08.peg.5283_53668	re09.peg.3956_58838	re14.peg.2609_98438	re15.peg.3898_106549	re17.peg.2113_121019	re18.peg.4172_130007	re19.peg.2550_135096	re20.peg.4631_143405	re22.peg.3224_156016	re04.peg.1356_22661	re10.peg.1618_63193	re11.peg.2263_72987	re12.peg.3150_82636	re13.peg.5067_93699	re16.peg.4096_116030	re21.peg.2486_148562	rq23.peg.2814_169393	rq24.peg.2370_175708	rq25.peg.3674_183470	rq26.peg.909_187433	rq27.peg.4990_198794	rq28.peg.3594_203820	re30.peg.1327_160996	rq29.peg.5525_214245
486	group_12731	4'-phosphopantetheinyl transferase EntD	30	30	1	312	24331				311	659	641	re01.peg.3025_3025	re02.peg.5328_12509	re03.peg.5622_19848	re05.peg.5126_33589	re06.peg.1848_36876	re07.peg.1973_44186	re08.peg.5344_53729	re09.peg.4017_58899	re14.peg.2542_98371	re15.peg.3803_106454	re17.peg.2175_121081	re18.peg.4080_129915	re19.peg.2490_135036	re20.peg.4541_143315	re22.peg.3158_155950	re04.peg.1419_22724	re10.peg.1531_63106	re11.peg.2191_72915	re12.peg.3051_82537	re13.peg.5004_93636	re16.peg.4153_116087	re21.peg.2548_148624	rq23.peg.2752_169331	rq24.peg.2433_175771	rq25.peg.3614_183410	rq26.peg.966_187490	rq27.peg.5052_198856	rq28.peg.3520_203746	re30.peg.1270_160939	rq29.peg.5462_214182
487	group_12733	FIG00547443: hypothetical protein	30	30	1	312	24330				338	923	847	re01.peg.3026_3026	re02.peg.5329_12510	re03.peg.5621_19847	re05.peg.5125_33588	re06.peg.1849_36877	re07.peg.1972_44185	re08.peg.5345_53730	re09.peg.4018_58900	re14.peg.2541_98370	re15.peg.3802_106453	re17.peg.2176_121082	re18.peg.4079_129914	re19.peg.2489_135035	re20.peg.4540_143314	re22.peg.3157_155949	re04.peg.1420_22725	re10.peg.1530_63105	re11.peg.2190_72914	re12.peg.3050_82536	re13.peg.5003_93635	re16.peg.4154_116088	re21.peg.2549_148625	rq23.peg.2751_169330	rq24.peg.2434_175772	rq25.peg.3613_183409	rq26.peg.967_187491	rq27.peg.5053_198857	rq28.peg.3519_203745	re30.peg.1269_160938	rq29.peg.5461_214181
488	group_12738	hypothetical protein	30	30	1	312	24287				539	779	771	re01.peg.3044_3044	re02.peg.2600_9781	re03.peg.5601_19827	re05.peg.2439_30902	re06.peg.6619_41645	re07.peg.1952_44165	re08.peg.5363_53748	re09.peg.4037_58919	re14.peg.2522_98351	re15.peg.3775_106426	re17.peg.2196_121102	re18.peg.3031_128866	re19.peg.2471_135017	re20.peg.4522_143296	re22.peg.3139_155931	re04.peg.1440_22745	re10.peg.1905_63480	re11.peg.7352_78076	re12.peg.6716_86202	re13.peg.4984_93616	re16.peg.4173_116107	re21.peg.3058_149134	rq23.peg.2732_169311	rq24.peg.2454_175792	rq25.peg.3593_183389	rq26.peg.987_187511	rq27.peg.5073_198877	rq28.peg.6980_207205	re30.peg.1249_160918	rq29.peg.5441_214161
489	group_12739	Inosine-5'-monophosphate dehydrogenase	30	30	1	312	24280				428	476	432	re01.peg.3051_3051	re02.peg.2592_9773	re03.peg.5594_19820	re05.peg.2432_30895	re06.peg.6612_41638	re07.peg.1945_44158	re08.peg.5197_53582	re09.peg.4044_58926	re14.peg.2515_98344	re15.peg.3758_106409	re17.peg.2203_121109	re18.peg.3039_128874	re19.peg.2464_135010	re20.peg.4515_143289	re22.peg.3132_155924	re04.peg.1447_22752	re10.peg.1913_63488	re11.peg.7344_78068	re12.peg.6725_86211	re13.peg.4977_93609	re16.peg.4180_116114	re21.peg.3051_149127	rq23.peg.2725_169304	rq24.peg.2461_175799	rq25.peg.3586_183382	rq26.peg.994_187518	rq27.peg.5080_198884	rq28.peg.6988_207213	re30.peg.1242_160911	rq29.peg.5434_214154
490	group_12746	Citrate lyase beta chain	30	30	1	312	24142				197	830	800	re01.peg.3115_3115	re02.peg.2516_9697	re03.peg.5528_19754	re05.peg.2368_30831	re06.peg.6546_41572	re07.peg.1881_44094	re08.peg.5263_53648	re09.peg.4108_58990	re14.peg.2451_98280	re15.peg.3671_106322	re17.peg.2264_121170	re18.peg.3106_128941	re19.peg.2400_134946	re20.peg.4455_143229	re22.peg.3067_155859	re04.peg.1518_22823	re10.peg.1998_63573	re11.peg.3555_74279	re12.peg.2457_81943	re13.peg.4907_93539	re16.peg.4250_116184	re21.peg.2990_149066	rq23.peg.2663_169242	rq24.peg.2521_175859	rq25.peg.3525_183321	rq26.peg.1055_187579	rq27.peg.5142_198946	rq28.peg.5700_205925	re30.peg.1181_160850	rq29.peg.5373_214093
491	group_12751	Tyrosine recombinase XerC	30	30	1	312	24127				926	1061	934	re01.peg.3124_3124	re02.peg.2504_9685	re03.peg.5518_19744	re05.peg.2359_30822	re06.peg.6536_41562	re07.peg.1871_44084	re08.peg.5272_53657	re09.peg.4117_58999	re14.peg.2442_98271	re15.peg.3661_106312	re17.peg.2274_121180	re18.peg.3116_128951	re19.peg.2391_134937	re20.peg.4446_143220	re22.peg.3057_155849	re04.peg.1528_22833	re10.peg.2011_63586	re11.peg.3568_74292	re12.peg.2442_81928	re13.peg.4897_93529	re16.peg.4260_116194	re21.peg.2980_149056	rq23.peg.2653_169232	rq24.peg.2531_175869	rq25.peg.3515_183311	rq26.peg.1065_187589	rq27.peg.5152_198956	rq28.peg.5711_205936	re30.peg.1171_160840	rq29.peg.5363_214083
492	group_12752	possible transcriptional regulator	30	30	1	312	17401				635	656	635	re01.peg.3152_3152	re02.peg.1082_8263	re03.peg.4844_19070	re05.peg.3042_31505	re06.peg.6807_41833	re07.peg.5650_47863	re08.peg.5394_53779	re09.peg.34_54916	re14.peg.609_96438	re15.peg.889_103540	re17.peg.524_119430	re18.peg.4473_130308	re19.peg.558_133104	re20.peg.2902_141676	re22.peg.1022_153814	re04.peg.538_21843	re10.peg.5072_66647	re11.peg.5235_75959	re12.peg.5449_84935	re13.peg.2070_90702	re16.peg.5915_117849	re21.peg.1441_147517	rq23.peg.664_167243	rq24.peg.73_173411	rq25.peg.3409_183205	rq26.peg.3353_189877	rq27.peg.1305_195109	rq28.peg.3810_204036	re30.peg.2785_162454	rq29.peg.687_209407
493	group_12753	5-aminopentanamidase	30	30	1	312	17399				839	845	844	re01.peg.3153_3153	re02.peg.1081_8262	re03.peg.4843_19069	re05.peg.3041_31504	re06.peg.6808_41834	re07.peg.5649_47862	re08.peg.5393_53778	re09.peg.33_54915	re14.peg.610_96439	re15.peg.890_103541	re17.peg.523_119429	re18.peg.4474_130309	re19.peg.559_133105	re20.peg.2903_141677	re22.peg.1023_153815	re04.peg.537_21842	re10.peg.5073_66648	re11.peg.5234_75958	re12.peg.5450_84936	re13.peg.2069_90701	re16.peg.5914_117848	re21.peg.1442_147518	rq23.peg.665_167244	rq24.peg.74_173412	rq25.peg.3408_183204	rq26.peg.3352_189876	rq27.peg.1304_195108	rq28.peg.3809_204035	re30.peg.2786_162455	rq29.peg.686_209406
494	group_12754	possible transcriptional regulator TetR family	30	30	1	312	17382				398	641	599	re01.peg.3163_3163	re02.peg.1071_8252	re03.peg.4833_19059	re05.peg.3032_31495	re06.peg.6818_41844	re07.peg.5639_47852	re08.peg.5383_53768	re09.peg.23_54905	re14.peg.620_96449	re15.peg.906_103557	re17.peg.513_119419	re18.peg.4484_130319	re19.peg.569_133115	re20.peg.2913_141687	re22.peg.1033_153825	re04.peg.527_21832	re10.peg.5087_66662	re11.peg.5220_75944	re12.peg.7362_86848	re13.peg.2059_90691	re16.peg.5903_117837	re21.peg.1452_147528	rq23.peg.675_167254	rq24.peg.85_173423	rq25.peg.3398_183194	rq26.peg.3342_189866	rq27.peg.1293_195097	rq28.peg.3797_204023	re30.peg.2797_162466	rq29.peg.675_209395
495	group_12758	putative ATP/GTP-binding protein protein	30	30	1	312	17314				857	1109	1096	re01.peg.3175_3175	re02.peg.1059_8240	re03.peg.4821_19047	re05.peg.3019_31482	re06.peg.6860_41886	re07.peg.5627_47840	re08.peg.5372_53757	re09.peg.12_54894	re14.peg.632_96461	re15.peg.922_103573	re17.peg.501_119407	re18.peg.4525_130360	re19.peg.579_133125	re20.peg.2925_141699	re22.peg.1045_153837	re04.peg.515_21820	re10.peg.5105_66680	re11.peg.5203_75927	re12.peg.7335_86821	re13.peg.2046_90678	re16.peg.5892_117826	re21.peg.1463_147539	rq23.peg.687_167266	rq24.peg.126_173464	rq25.peg.3386_183182	rq26.peg.3330_189854	rq27.peg.1251_195055	rq28.peg.3779_204005	re30.peg.2809_162478	rq29.peg.664_209384
496	group_12760	FIG00999031: hypothetical protein	30	30	1	312	17312				848	881	853	re01.peg.3176_3176	re02.peg.1058_8239	re03.peg.4820_19046	re05.peg.3018_31481	re06.peg.6861_41887	re07.peg.5626_47839	re08.peg.5371_53756	re09.peg.11_54893	re14.peg.633_96462	re15.peg.923_103574	re17.peg.500_119406	re18.peg.4526_130361	re19.peg.580_133126	re20.peg.2926_141700	re22.peg.1046_153838	re04.peg.514_21819	re10.peg.5106_66681	re11.peg.5202_75926	re12.peg.7334_86820	re13.peg.2045_90677	re16.peg.5891_117825	re21.peg.1464_147540	rq23.peg.688_167267	rq24.peg.127_173465	rq25.peg.3385_183181	rq26.peg.3329_189853	rq27.peg.1250_195054	rq28.peg.3778_204004	re30.peg.2810_162479	rq29.peg.663_209383
497	group_12761	FIG00994292: hypothetical protein	30	30	1	312	17295				344	539	446	re01.peg.3180_3180	re02.peg.1051_8232	re03.peg.4816_19042	re05.peg.3012_31475	re06.peg.6865_41891	re07.peg.5622_47835	re08.peg.5367_53752	re09.peg.7_54889	re14.peg.637_96466	re15.peg.929_103580	re17.peg.496_119402	re18.peg.4531_130366	re19.peg.584_133130	re20.peg.2930_141704	re22.peg.1050_153842	re04.peg.510_21815	re10.peg.6935_68510	re11.peg.282_71006	re12.peg.5887_85373	re13.peg.2041_90673	re16.peg.5887_117821	re21.peg.1468_147544	rq23.peg.692_167271	rq24.peg.131_173469	rq25.peg.3381_183177	rq26.peg.3325_189849	rq27.peg.1246_195050	rq28.peg.3773_203999	re30.peg.2814_162483	rq29.peg.659_209379
498	group_1277	Kynurenine formamidase bacterial	30	30	1	312	29417				443	731	686	re01.peg.5657_5656	re02.peg.2960_10141	re03.peg.2639_16865	re05.peg.411_28874	re06.peg.659_35687	re07.peg.474_42687	re08.peg.305_48690	re09.peg.1231_56113	re14.peg.5398_101227	re15.peg.7818_110469	re17.peg.3038_121944	re18.peg.186_126022	re19.peg.5315_137861	re20.peg.1708_140482	re22.peg.6079_158871	re04.peg.5252_26557	re10.peg.1866_63441	re11.peg.2662_73386	re12.peg.3409_82895	re13.peg.1322_89954	re16.peg.701_112635	re21.peg.3493_149569	rq23.peg.5675_172254	rq24.peg.844_174182	rq25.peg.1213_181009	rq26.peg.4681_191205	rq27.peg.2559_196363	rq28.peg.2269_202495	re30.peg.4190_163859	rq29.peg.2818_211538
499	group_12774	Predicted cobalt transporter CbtA	30	30	1	312	16713				752	776	775	re01.peg.3263_3263	re02.peg.983_8164	re03.peg.6282_20508	re05.peg.2939_31402	re06.peg.3306_38333	re07.peg.4604_46817	re08.peg.4791_53176	re09.peg.5834_60716	re14.peg.706_96535	re15.peg.1095_103746	re17.peg.424_119330	re18.peg.1388_127224	re19.peg.660_133206	re20.peg.3018_141792	re22.peg.1116_153908	re04.peg.446_21751	re10.peg.4411_65986	re11.peg.390_71114	re12.peg.1835_81321	re13.peg.1955_90587	re16.peg.5266_117200	re21.peg.5595_151671	rq23.peg.756_167335	rq24.peg.191_173529	rq25.peg.3320_183116	rq26.peg.5031_191555	rq27.peg.1177_194981	rq28.peg.4966_205192	re30.peg.4998_164667	rq29.peg.595_209315
500	group_12786	hypothetical protein	30	30	1	312	16419				338	692	504	re01.peg.3316_3316	re02.peg.945_8126	re03.peg.6246_20472	re05.peg.2903_31366	re06.peg.3342_38369	re07.peg.4661_46874	re08.peg.4755_53140	re09.peg.5798_60680	re14.peg.742_96571	re15.peg.1170_103821	re17.peg.388_119294	re18.peg.1426_127262	re19.peg.696_133242	re20.peg.3054_141828	re22.peg.1151_153943	re04.peg.389_21694	re10.peg.6192_67767	re11.peg.461_71185	re12.peg.356_79842	re13.peg.1918_90550	re16.peg.5209_117143	re21.peg.5631_151707	rq23.peg.793_167372	rq24.peg.228_173566	rq25.peg.3282_183078	rq26.peg.5069_191593	rq27.peg.1140_194944	rq28.peg.5069_205295	re30.peg.5035_164704	rq29.peg.4807_213527
501	group_12789	PhnB protein%3B putative DNA binding 3-demethylubiquinone-9 3-methyltransferase domain protein	30	30	1	312	16382				227	410	397	re01.peg.3335_3335	re02.peg.924_8105	re03.peg.6351_20577	re05.peg.2881_31344	re06.peg.3362_38389	re07.peg.4681_46894	re08.peg.4735_53120	re09.peg.5779_60661	re14.peg.762_96591	re15.peg.1322_103973	re17.peg.367_119273	re18.peg.1447_127283	re19.peg.716_133262	re20.peg.3073_141847	re22.peg.1171_153963	re04.peg.369_21674	re10.peg.6224_67799	re11.peg.486_71210	re12.peg.385_79871	re13.peg.1898_90530	re16.peg.2607_114541	re21.peg.5651_151727	rq23.peg.813_167392	rq24.peg.248_173586	rq25.peg.3262_183058	rq26.peg.5089_191613	rq27.peg.1119_194923	rq28.peg.1010_201236	re30.peg.5054_164723	rq29.peg.4826_213546
502	group_12792	3-oxoacyl-[acyl-carrier protein] reductase	30	30	1	312	16375				656	848	841	re01.peg.3337_3337	re02.peg.922_8103	re03.peg.6353_20579	re05.peg.2879_31342	re06.peg.3364_38391	re07.peg.4683_46896	re08.peg.4733_53118	re09.peg.5777_60659	re14.peg.764_96593	re15.peg.1324_103975	re17.peg.365_119271	re18.peg.1449_127285	re19.peg.718_133264	re20.peg.3075_141849	re22.peg.1173_153965	re04.peg.367_21672	re10.peg.6228_67803	re11.peg.488_71212	re12.peg.389_79875	re13.peg.1896_90528	re16.peg.2609_114543	re21.peg.5653_151729	rq23.peg.815_167394	rq24.peg.250_173588	rq25.peg.3260_183056	rq26.peg.5091_191615	rq27.peg.1117_194921	rq28.peg.1008_201234	re30.peg.5056_164725	rq29.peg.4828_213548
503	group_12794	Rubredoxin	30	30	1	312	16305				191	206	198	re01.peg.3367_3367	re02.peg.881_8062	re03.peg.6386_20612	re05.peg.2844_31307	re06.peg.3397_38424	re07.peg.4724_46937	re08.peg.1843_50228	re09.peg.5744_60626	re14.peg.796_96625	re15.peg.1366_104017	re17.peg.333_119239	re18.peg.1492_127328	re19.peg.749_133295	re20.peg.3116_141890	re22.peg.1204_153996	re04.peg.336_21641	re10.peg.1099_62674	re11.peg.525_71249	re12.peg.429_79915	re13.peg.1864_90496	re16.peg.2639_114573	re21.peg.5683_151759	rq23.peg.846_167425	rq24.peg.280_173618	rq25.peg.3229_183025	rq26.peg.5121_191645	rq27.peg.1087_194891	rq28.peg.976_201202	re30.peg.5086_164755	rq29.peg.4858_213578
504	group_12795	possible transcriptional regulator TetR family	30	30	1	312	16301				389	656	619	re01.peg.3369_3369	re02.peg.879_8060	re03.peg.6389_20615	re05.peg.2842_31305	re06.peg.3399_38426	re07.peg.4726_46939	re08.peg.1841_50226	re09.peg.5742_60624	re14.peg.798_96627	re15.peg.1368_104019	re17.peg.331_119237	re18.peg.1494_127330	re19.peg.751_133297	re20.peg.3118_141892	re22.peg.1206_153998	re04.peg.334_21639	re10.peg.1097_62672	re11.peg.527_71251	re12.peg.432_79918	re13.peg.1862_90494	re16.peg.2641_114575	re21.peg.5685_151761	rq23.peg.848_167427	rq24.peg.282_173620	rq25.peg.3227_183023	rq26.peg.5124_191648	rq27.peg.1085_194889	rq28.peg.974_201200	re30.peg.5089_164758	rq29.peg.4860_213580
505	group_12797	conserved hypothetical protein	30	30	1	312	16152				290	503	495	re01.peg.3404_3404	re02.peg.835_8016	re03.peg.6429_20655	re05.peg.2806_31269	re06.peg.3441_38468	re07.peg.4768_46981	re08.peg.1761_50146	re09.peg.5700_60582	re14.peg.841_96670	re15.peg.1421_104072	re17.peg.289_119195	re18.peg.1539_127375	re19.peg.794_133340	re20.peg.3161_141935	re22.peg.1333_154125	re04.peg.293_21598	re10.peg.1042_62617	re11.peg.2876_73600	re12.peg.499_79985	re13.peg.1820_90452	re16.peg.2683_114617	re21.peg.5726_151802	rq23.peg.890_167469	rq24.peg.322_173660	rq25.peg.3188_182984	rq26.peg.5165_191689	rq27.peg.1039_194843	rq28.peg.927_201153	re30.peg.5130_164799	rq29.peg.4902_213622
506	group_12799	Pirin	30	30	1	312	16132				290	788	771	re01.peg.3410_3410	re02.peg.830_8011	re03.peg.6435_20661	re05.peg.2800_31263	re06.peg.3447_38474	re07.peg.4774_46987	re08.peg.1755_50140	re09.peg.5694_60576	re14.peg.847_96676	re15.peg.1432_104083	re17.peg.283_119189	re18.peg.1547_127383	re19.peg.800_133346	re20.peg.3167_141941	re22.peg.1339_154131	re04.peg.286_21591	re10.peg.1033_62608	re11.peg.2868_73592	re12.peg.508_79994	re13.peg.1814_90446	re16.peg.2689_114623	re21.peg.5732_151808	rq23.peg.896_167475	rq24.peg.5173_178511	rq25.peg.3182_182978	rq26.peg.5171_191695	rq27.peg.1033_194837	rq28.peg.919_201145	re30.peg.5136_164805	rq29.peg.4908_213628
507	group_1280	1 4-alpha-glucan (glycogen) branching enzyme GH-13-type	30	50	1.67	312	19737				362	2948	1743	re01.peg.6011_6010 re01.peg.6010_6009	re02.peg.6459_13640 re02.peg.6460_13641 re02.peg.6461_13642	re03.peg.409_14635	re05.peg.4751_33214 re05.peg.4750_33213	re06.peg.5525_40552	re07.peg.5749_47962 re07.peg.5748_47961	re08.peg.5608_53993	re09.peg.2793_57675	re14.peg.3747_99576	re15.peg.5555_108206 re15.peg.5556_108207 re15.peg.5557_108208 re15.peg.5553_108204	re17.peg.6220_125126 re17.peg.6219_125125	re18.peg.3916_129751 re18.peg.3917_129752	re19.peg.3694_136240	re20.peg.5846_144620	re22.peg.4468_157260	re04.peg.4982_26287 re04.peg.4983_26288	re10.peg.8756_70331 re10.peg.8754_70329 re10.peg.8755_70330	re11.peg.7126_77850 re11.peg.7125_77849	re12.peg.8279_87765 re12.peg.8280_87766	re13.peg.3164_91796	re16.peg.657_112591 re16.peg.658_112592	re21.peg.5440_151516 re21.peg.5439_151515	rq23.peg.3970_170549	rq24.peg.344_173682	rq25.peg.5272_185068	rq26.peg.7060_193584 rq26.peg.7059_193583	rq27.peg.4314_198118	rq28.peg.6969_207194 rq28.peg.6970_207195 rq28.peg.6971_207196	re30.peg.2534_162203	rq29.peg.4284_213004
508	group_12803	COGs COG0840	30	30	1	312	16096				164	353	224	re01.peg.3431_3431	re02.peg.809_7990	re03.peg.6457_20683	re05.peg.2777_31240	re06.peg.3468_38495	re07.peg.4795_47008	re08.peg.1734_50119	re09.peg.5673_60555	re14.peg.869_96698	re15.peg.1462_104113	re17.peg.260_119166	re18.peg.1568_127404	re19.peg.821_133367	re20.peg.3189_141963	re22.peg.1362_154154	re04.peg.265_21570	re10.peg.1006_62581	re11.peg.2838_73562	re12.peg.534_80020	re13.peg.1793_90425	re16.peg.2710_114644	re21.peg.5753_151829	rq23.peg.917_167496	rq24.peg.5194_178532	rq25.peg.3161_182957	rq26.peg.6475_192999	rq27.peg.1012_194816	rq28.peg.895_201121	re30.peg.5157_164826	rq29.peg.4929_213649
509	group_12804	FIG01001703: hypothetical protein	30	30	1	312	16089				860	950	906	re01.peg.3435_3435	re02.peg.804_7985	re03.peg.6462_20688	re05.peg.2774_31237	re06.peg.3474_38501	re07.peg.4801_47014	re08.peg.1729_50114	re09.peg.5668_60550	re14.peg.874_96703	re15.peg.1468_104119	re17.peg.255_119161	re18.peg.1575_127411	re19.peg.826_133372	re20.peg.3194_141968	re22.peg.1365_154157	re04.peg.260_21565	re10.peg.1001_62576	re11.peg.2833_73557	re12.peg.539_80025	re13.peg.1789_90421	re16.peg.2715_114649	re21.peg.5757_151833	rq23.peg.922_167501	rq24.peg.5199_178537	rq25.peg.3157_182953	rq26.peg.6479_193003	rq27.peg.1008_194812	rq28.peg.888_201114	re30.peg.5161_164830	rq29.peg.4933_213653
510	group_12805	MCE-family protein Mce1F	30	30	1	312	16087				1220	1295	1222	re01.peg.3437_3437	re02.peg.802_7983	re03.peg.6464_20690	re05.peg.2772_31235	re06.peg.3476_38503	re07.peg.4803_47016	re08.peg.1727_50112	re09.peg.5666_60548	re14.peg.876_96705	re15.peg.1470_104121	re17.peg.253_119159	re18.peg.1577_127413	re19.peg.828_133374	re20.peg.3196_141970	re22.peg.1367_154159	re04.peg.258_21563	re10.peg.999_62574	re11.peg.2831_73555	re12.peg.541_80027	re13.peg.1787_90419	re16.peg.2717_114651	re21.peg.5759_151835	rq23.peg.924_167503	rq24.peg.5201_178539	rq25.peg.3155_182951	rq26.peg.6481_193005	rq27.peg.1006_194810	rq28.peg.886_201112	re30.peg.5163_164832	rq29.peg.4935_213655
511	group_12806	Conserved hypothetical integral membrane protein YrbE1B	30	30	1	312	16080				803	857	852	re01.peg.3443_3443	re02.peg.796_7977	re03.peg.6470_20696	re05.peg.2766_31229	re06.peg.3482_38509	re07.peg.4809_47022	re08.peg.1721_50106	re09.peg.5660_60542	re14.peg.882_96711	re15.peg.1478_104129	re17.peg.247_119153	re18.peg.1583_127419	re19.peg.834_133380	re20.peg.3202_141976	re22.peg.1373_154165	re04.peg.252_21557	re10.peg.991_62566	re11.peg.2825_73549	re12.peg.548_80034	re13.peg.1781_90413	re16.peg.2723_114657	re21.peg.5765_151841	rq23.peg.930_167509	rq24.peg.5207_178545	rq25.peg.3149_182945	rq26.peg.6487_193011	rq27.peg.1000_194804	rq28.peg.880_201106	re30.peg.5169_164838	rq29.peg.4941_213661
512	group_12811	FIG00997967: hypothetical protein	30	30	1	312	26541				776	824	793	re01.peg.3472_3472	re02.peg.5412_12593	re03.peg.2135_16361	re05.peg.1573_30036	re06.peg.2547_37574	re07.peg.3082_45295	re08.peg.5771_54156	re09.peg.2327_57209	re14.peg.4230_100059	re15.peg.6241_108892	re17.peg.3536_122442	re18.peg.1334_127170	re19.peg.4175_136721	re20.peg.577_139351	re22.peg.4952_157744	re04.peg.3289_24594	re10.peg.5243_66818	re11.peg.4166_74890	re12.peg.6304_85790	re13.peg.6406_95038	re16.peg.2341_114275	re21.peg.6360_152436	rq23.peg.4515_171094	rq24.peg.3662_177000	rq25.peg.159_179955	rq26.peg.2070_188594	rq27.peg.5750_199554	rq28.peg.1823_202049	re30.peg.3110_162779	rq29.peg.1736_210456
513	group_12812	FIG00994388: hypothetical protein	30	30	1	312	26581				650	722	683	re01.peg.3493_3493	re02.peg.5437_12618	re03.peg.2114_16340	re05.peg.1552_30015	re06.peg.2568_37595	re07.peg.3103_45316	re08.peg.5750_54135	re09.peg.2306_57188	re14.peg.4251_100080	re15.peg.6274_108925	re17.peg.3557_122463	re18.peg.1312_127148	re19.peg.4196_136742	re20.peg.598_139372	re22.peg.4973_157765	re04.peg.3267_24572	re10.peg.5212_66787	re11.peg.4137_74861	re12.peg.6273_85759	re13.peg.6428_95060	re16.peg.2363_114297	re21.peg.6338_152414	rq23.peg.4537_171116	rq24.peg.3683_177021	rq25.peg.181_179977	rq26.peg.2049_188573	rq27.peg.5729_199533	rq28.peg.1850_202076	re30.peg.3131_162800	rq29.peg.1757_210477
514	group_12814	DUF1794	30	30	1	312	26586				488	488	488	re01.peg.3496_3496	re02.peg.5440_12621	re03.peg.2111_16337	re05.peg.1549_30012	re06.peg.2571_37598	re07.peg.3106_45319	re08.peg.5747_54132	re09.peg.2303_57185	re14.peg.4254_100083	re15.peg.6277_108928	re17.peg.3560_122466	re18.peg.1309_127145	re19.peg.4199_136745	re20.peg.601_139375	re22.peg.4976_157768	re04.peg.3264_24569	re10.peg.5208_66783	re11.peg.4134_74858	re12.peg.6270_85756	re13.peg.6431_95063	re16.peg.2366_114300	re21.peg.6335_152411	rq23.peg.4540_171119	rq24.peg.3686_177024	rq25.peg.184_179980	rq26.peg.2046_188570	rq27.peg.5726_199530	rq28.peg.1852_202078	re30.peg.3134_162803	rq29.peg.1760_210480
515	group_12815	FIG00998618: hypothetical protein	30	30	1	312	26593				956	1001	983	re01.peg.3502_3502	re02.peg.5445_12626	re03.peg.2105_16331	re05.peg.1543_30006	re06.peg.2577_37604	re07.peg.3112_45325	re08.peg.5741_54126	re09.peg.2297_57179	re14.peg.4260_100089	re15.peg.6283_108934	re17.peg.3566_122472	re18.peg.1303_127139	re19.peg.4205_136751	re20.peg.607_139381	re22.peg.4982_157774	re04.peg.3258_24563	re10.peg.5200_66775	re11.peg.4126_74850	re12.peg.6264_85750	re13.peg.6437_95069	re16.peg.2372_114306	re21.peg.6329_152405	rq23.peg.4546_171125	rq24.peg.3692_177030	rq25.peg.190_179986	rq26.peg.2040_188564	rq27.peg.5720_199524	rq28.peg.1858_202084	re30.peg.3140_162809	rq29.peg.1766_210486
516	group_12821	4-aminobutyraldehyde dehydrogenase	30	30	1	312	26647				1346	1430	1426	re01.peg.3530_3530	re02.peg.5476_12657	re03.peg.2068_16294	re05.peg.1514_29977	re06.peg.2606_37633	re07.peg.3140_45353	re08.peg.1353_49738	re09.peg.2269_57151	re14.peg.4288_100117	re15.peg.6318_108969	re17.peg.3595_122501	re18.peg.1275_127111	re19.peg.4235_136781	re20.peg.635_139409	re22.peg.5010_157802	re04.peg.3229_24534	re10.peg.7649_69224	re11.peg.7256_77980	re12.peg.6999_86485	re13.peg.6549_95181	re16.peg.2400_114334	re21.peg.6517_152593	rq23.peg.4577_171156	rq24.peg.1907_175245	rq25.peg.222_180018	rq26.peg.2011_188535	rq27.peg.3658_197462	rq28.peg.1887_202113	re30.peg.3168_162837	rq29.peg.949_209669
517	group_12823	Universal stress protein family	30	30	1	312	26649				857	899	897	re01.peg.3531_3531	re02.peg.5477_12658	re03.peg.2067_16293	re05.peg.1513_29976	re06.peg.2607_37634	re07.peg.3141_45354	re08.peg.1352_49737	re09.peg.2268_57150	re14.peg.4289_100118	re15.peg.6319_108970	re17.peg.3596_122502	re18.peg.1274_127110	re19.peg.4236_136782	re20.peg.636_139410	re22.peg.5011_157803	re04.peg.3228_24533	re10.peg.7650_69225	re11.peg.7255_77979	re12.peg.7000_86486	re13.peg.6550_95182	re16.peg.2401_114335	re21.peg.6516_152592	rq23.peg.4578_171157	rq24.peg.1906_175244	rq25.peg.223_180019	rq26.peg.2010_188534	rq27.peg.3657_197461	rq28.peg.1888_202114	re30.peg.3169_162838	rq29.peg.950_209670
518	group_12828	Chorismate mutase I	30	30	1	312	26693				281	326	322	re01.peg.3553_3553	re02.peg.6593_13774	re03.peg.2044_16270	re05.peg.1490_29953	re06.peg.2629_37656	re07.peg.3164_45377	re08.peg.1330_49715	re09.peg.2245_57127	re14.peg.4312_100141	re15.peg.6349_109000	re17.peg.592_119498	re18.peg.1250_127086	re19.peg.4259_136805	re20.peg.658_139432	re22.peg.5033_157825	re04.peg.3207_24512	re10.peg.4476_66051	re11.peg.8008_78732	re12.peg.2721_82207	re13.peg.6572_95204	re16.peg.2424_114358	re21.peg.6494_152570	rq23.peg.4600_171179	rq24.peg.1885_175223	rq25.peg.244_180040	rq26.peg.1989_188513	rq27.peg.3636_197440	rq28.peg.1916_202142	re30.peg.3190_162859	rq29.peg.972_209692
519	group_12850	hypothetical protein	30	30	1	312	26988				458	509	491	re01.peg.3753_3753	re02.peg.3811_10992	re03.peg.1907_16133	re05.peg.1341_29804	re06.peg.2765_37792	re07.peg.3298_45511	re08.peg.1211_49596	re09.peg.2109_56991	re14.peg.4450_100279	re15.peg.6539_109190	re17.peg.1593_120499	re18.peg.1115_126951	re19.peg.4401_136947	re20.peg.790_139564	re22.peg.5174_157966	re04.peg.3048_24353	re10.peg.4808_66383	re11.peg.3246_73970	re12.peg.1313_80799	re13.peg.4345_92977	re16.peg.4654_116588	re21.peg.81_146157	rq23.peg.4734_171313	rq24.peg.1750_175088	rq25.peg.358_180154	rq26.peg.1854_188378	rq27.peg.3504_197308	rq28.peg.2297_202523	re30.peg.3325_162994	rq29.peg.4415_213135
520	group_12851	Transcriptional regulator TetR family	30	30	1	312	27018				161	575	561	re01.peg.3764_3764	re02.peg.3797_10978	re03.peg.1895_16121	re05.peg.1329_29792	re06.peg.2777_37804	re07.peg.3310_45523	re08.peg.1200_49585	re09.peg.2097_56979	re14.peg.4462_100291	re15.peg.6552_109203	re17.peg.1581_120487	re18.peg.1103_126939	re19.peg.4413_136959	re20.peg.802_139576	re22.peg.5185_157977	re04.peg.3036_24341	re10.peg.4792_66367	re11.peg.3260_73984	re12.peg.1329_80815	re13.peg.4357_92989	re16.peg.4666_116600	re21.peg.93_146169	rq23.peg.4746_171325	rq24.peg.1738_175076	rq25.peg.370_180166	rq26.peg.1842_188366	rq27.peg.3492_197296	rq28.peg.2310_202536	re30.peg.3337_163006	rq29.peg.4426_213146
521	group_12856	Glycerol kinase	30	30	1	312	27067				1253	1508	1492	re01.peg.3790_3790	re02.peg.3772_10953	re03.peg.1870_16096	re05.peg.1307_29770	re06.peg.2799_37826	re07.peg.3332_45545	re08.peg.1177_49562	re09.peg.2075_56957	re14.peg.4484_100313	re15.peg.6585_109236	re17.peg.1559_120465	re18.peg.1079_126915	re19.peg.4435_136981	re20.peg.824_139598	re22.peg.5208_158000	re04.peg.3012_24317	re10.peg.4761_66336	re11.peg.5785_76509	re12.peg.1360_80846	re13.peg.4382_93014	re16.peg.4689_116623	re21.peg.116_146192	rq23.peg.4770_171349	rq24.peg.1713_175051	rq25.peg.394_180190	rq26.peg.1818_188342	rq27.peg.3468_197272	rq28.peg.2334_202560	re30.peg.3361_163030	rq29.peg.4451_213171
522	group_12858	hypothetical protein	30	30	1	312	15452				173	215	202	re01.peg.3806_3806	re02.peg.463_7644	re03.peg.6765_20991	re05.peg.2455_30918	re06.peg.7005_42031	re07.peg.5083_47296	re08.peg.1418_49803	re09.peg.5366_60248	re14.peg.1186_97015	re15.peg.1901_104552	re17.peg.5892_124798	re18.peg.3481_129316	re19.peg.1136_133682	re20.peg.3514_142288	re22.peg.1677_154469	re04.peg.5736_27041	re10.peg.3584_65159	re11.peg.3100_73824	re12.peg.4118_83604	re13.peg.1001_89633	re16.peg.6331_118265	re21.peg.6083_152159	rq23.peg.1241_167820	rq24.peg.3706_177044	rq25.peg.2846_182642	rq26.peg.2141_188665	rq27.peg.692_194496	rq28.peg.495_200721	re30.peg.5478_165147	rq29.peg.5261_213981
523	group_12861	hypothetical protein	30	30	1	312	15574				236	470	438	re01.peg.3855_3855	re02.peg.516_7697	re03.peg.6715_20941	re05.peg.2506_30969	re06.peg.6955_41981	re07.peg.5024_47237	re08.peg.1468_49853	re09.peg.5413_60295	re14.peg.1137_96966	re15.peg.1841_104492	re17.peg.5839_124745	re18.peg.3430_129265	re19.peg.1086_133632	re20.peg.3462_142236	re22.peg.1628_154420	re04.peg.5670_26975	re10.peg.3484_65059	re11.peg.3157_73881	re12.peg.5773_85259	re13.peg.939_89571	re16.peg.6400_118334	re21.peg.6020_152096	rq23.peg.1184_167763	rq24.peg.3760_177098	rq25.peg.2901_182697	rq26.peg.2197_188721	rq27.peg.748_194552	rq28.peg.580_200806	re30.peg.5421_165090	rq29.peg.5193_213913
524	group_12862	hypothetical protein	30	30	1	312	15582				194	368	337	re01.peg.3860_3860	re02.peg.522_7703	re03.peg.6710_20936	re05.peg.2511_30974	re06.peg.6948_41974	re07.peg.5019_47232	re08.peg.1474_49859	re09.peg.5419_60301	re14.peg.1132_96961	re15.peg.1836_104487	re17.peg.3_118909	re18.peg.3425_129260	re19.peg.1080_133626	re20.peg.3457_142231	re22.peg.1623_154415	re04.peg.6_21311	re10.peg.3477_65052	re11.peg.3163_73887	re12.peg.5764_85250	re13.peg.1535_90167	re16.peg.6411_118345	re21.peg.6014_152090	rq23.peg.1174_167753	rq24.peg.3765_177103	rq25.peg.2906_182702	rq26.peg.2202_188726	rq27.peg.753_194557	rq28.peg.586_200812	re30.peg.5416_165085	rq29.peg.5187_213907
525	group_12863	possible transcriptional regulator	30	30	1	312	15600				491	563	560	re01.peg.3870_3870	re02.peg.531_7712	re03.peg.6701_20927	re05.peg.2519_30982	re06.peg.6939_41965	re07.peg.5012_47225	re08.peg.1482_49867	re09.peg.5427_60309	re14.peg.1123_96952	re15.peg.1822_104473	re17.peg.13_118919	re18.peg.3416_129251	re19.peg.1071_133617	re20.peg.3449_142223	re22.peg.1616_154408	re04.peg.15_21320	re10.peg.3463_65038	re11.peg.3177_73901	re12.peg.5750_85236	re13.peg.1543_90175	re16.peg.6419_118353	re21.peg.6006_152082	rq23.peg.1167_167746	rq24.peg.3772_177110	rq25.peg.2913_182709	rq26.peg.2210_188734	rq27.peg.760_194564	rq28.peg.595_200821	re30.peg.5409_165078	rq29.peg.5179_213899
526	group_12864	putative hydroxylase	30	30	1	312	15623				773	872	776	re01.peg.3879_3879	re02.peg.539_7720	re03.peg.6694_20920	re05.peg.2526_30989	re06.peg.6931_41957	re07.peg.5004_47217	re08.peg.1491_49876	re09.peg.5435_60317	re14.peg.1116_96945	re15.peg.1812_104463	re17.peg.22_118928	re18.peg.3409_129244	re19.peg.1064_133610	re20.peg.3441_142215	re22.peg.1607_154399	re04.peg.22_21327	re10.peg.3456_65031	re11.peg.3184_73908	re12.peg.5742_85228	re13.peg.1550_90182	re16.peg.6426_118360	re21.peg.5999_152075	rq23.peg.1160_167739	rq24.peg.3779_177117	rq25.peg.2920_182716	rq26.peg.2217_188741	rq27.peg.768_194572	rq28.peg.602_200828	re30.peg.5402_165071	rq29.peg.5172_213892
527	group_12868	FIG00821474: hypothetical protein	30	30	1	312	15656				434	2012	1906	re01.peg.3892_3892	re02.peg.554_7735	re03.peg.6682_20908	re05.peg.2540_31003	re06.peg.6918_41944	re07.peg.4991_47204	re08.peg.1503_49888	re09.peg.5447_60329	re14.peg.1104_96933	re15.peg.1792_104443	re17.peg.35_118941	re18.peg.3395_129230	re19.peg.1052_133598	re20.peg.3429_142203	re22.peg.1595_154387	re04.peg.36_21341	re10.peg.8272_69847	re11.peg.6409_77133	re12.peg.7962_87448	re13.peg.1563_90195	re16.peg.6439_118373	re21.peg.5986_152062	rq23.peg.1147_167726	rq24.peg.3792_177130	rq25.peg.2932_182728	rq26.peg.2230_188754	rq27.peg.781_194585	rq28.peg.617_200843	re30.peg.5389_165058	rq29.peg.5159_213879
528	group_12869	COG1476: Predicted transcriptional regulators	30	30	1	312	15661				218	245	239	re01.peg.3897_3897	re02.peg.556_7737	re03.peg.6680_20906	re05.peg.2542_31005	re06.peg.6916_41942	re07.peg.4989_47202	re08.peg.1505_49890	re09.peg.5449_60331	re14.peg.1102_96931	re15.peg.1790_104441	re17.peg.37_118943	re18.peg.3393_129228	re19.peg.1050_133596	re20.peg.3427_142201	re22.peg.1593_154385	re04.peg.38_21343	re10.peg.8270_69845	re11.peg.6407_77131	re12.peg.7960_87446	re13.peg.1565_90197	re16.peg.6441_118375	re21.peg.5984_152060	rq23.peg.1145_167724	rq24.peg.3797_177135	rq25.peg.2934_182730	rq26.peg.2235_188759	rq27.peg.786_194590	rq28.peg.619_200845	re30.peg.5384_165053	rq29.peg.5157_213877
529	group_12871	Beta-hexosaminidase	30	30	1	312	15674				1049	1211	1175	re01.peg.3905_3905	re02.peg.564_7745	re03.peg.6672_20898	re05.peg.2551_31014	re06.peg.6908_41934	re07.peg.4981_47194	re08.peg.1513_49898	re09.peg.5457_60339	re14.peg.1094_96923	re15.peg.1780_104431	re17.peg.45_118951	re18.peg.3383_129218	re19.peg.1042_133588	re20.peg.3419_142193	re22.peg.1585_154377	re04.peg.46_21351	re10.peg.8612_70187	re11.peg.6398_77122	re12.peg.8231_87717	re13.peg.1573_90205	re16.peg.6449_118383	re21.peg.5976_152052	rq23.peg.1137_167716	rq24.peg.3805_177143	rq25.peg.2942_182738	rq26.peg.2243_188767	rq27.peg.794_194598	rq28.peg.629_200855	re30.peg.5376_165045	rq29.peg.5149_213869
530	group_12873	putative membrane transport protein	30	30	1	312	15722				500	959	937	re01.peg.3927_3927	re02.peg.589_7770	re03.peg.6653_20879	re05.peg.2574_31037	re06.peg.4696_39723	re07.peg.4958_47171	re08.peg.1531_49916	re09.peg.5479_60361	re14.peg.1070_96899	re15.peg.1744_104395	re17.peg.63_118969	re18.peg.3359_129194	re19.peg.1019_133565	re20.peg.3395_142169	re22.peg.1562_154354	re04.peg.70_21375	re10.peg.2493_64068	re11.peg.1368_72092	re12.peg.7983_87469	re13.peg.1596_90228	re16.peg.6472_118406	re21.peg.5953_152029	rq23.peg.1114_167693	rq24.peg.3828_177166	rq25.peg.2964_182760	rq26.peg.2265_188789	rq27.peg.816_194620	rq28.peg.656_200882	re30.peg.5354_165023	rq29.peg.5126_213846
531	group_12875	FIG00820733: hypothetical protein Rv0207c	30	30	1	312	15742				620	815	708	re01.peg.3936_3936	re02.peg.599_7780	re03.peg.6644_20870	re05.peg.2584_31047	re06.peg.4687_39714	re07.peg.4949_47162	re08.peg.1540_49925	re09.peg.5488_60370	re14.peg.1061_96890	re15.peg.1729_104380	re17.peg.72_118978	re18.peg.3349_129184	re19.peg.1010_133556	re20.peg.3386_142160	re22.peg.1553_154345	re04.peg.80_21385	re10.peg.2478_64053	re11.peg.1355_72079	re12.peg.2034_81520	re13.peg.1606_90238	re16.peg.6483_118417	re21.peg.5942_152018	rq23.peg.1104_167683	rq24.peg.3838_177176	rq25.peg.2975_182771	rq26.peg.2276_188800	rq27.peg.826_194630	rq28.peg.667_200893	re30.peg.5344_165013	rq29.peg.5116_213836
532	group_12876	hypothetical protein	30	30	1	312	15798				284	350	295	re01.peg.3967_3967	re02.peg.636_7817	re03.peg.6616_20842	re05.peg.2617_31080	re06.peg.4654_39681	re07.peg.4920_47133	re08.peg.1574_49959	re09.peg.5516_60398	re14.peg.1028_96857	re15.peg.1689_104340	re17.peg.100_119006	re18.peg.3314_129149	re19.peg.981_133527	re20.peg.3351_142125	re22.peg.1520_154312	re04.peg.108_21413	re10.peg.2434_64009	re11.peg.1315_72039	re12.peg.1987_81473	re13.peg.1635_90267	re16.peg.6515_118449	re21.peg.5913_151989	rq23.peg.1076_167655	rq24.peg.3868_177206	rq25.peg.3004_182800	rq26.peg.2306_188830	rq27.peg.855_194659	rq28.peg.700_200926	re30.peg.5315_164984	rq29.peg.5085_213805
533	group_12877	Phosphoribosylformylglycinamidine synthase glutamine amidotransferase subunit	30	30	1	312	15804				470	701	667	re01.peg.3972_3972	re02.peg.645_7826	re03.peg.6609_20835	re05.peg.2624_31087	re06.peg.4647_39674	re07.peg.4914_47127	re08.peg.1581_49966	re09.peg.5523_60405	re14.peg.1021_96850	re15.peg.1684_104335	re17.peg.107_119013	re18.peg.3307_129142	re19.peg.974_133520	re20.peg.3344_142118	re22.peg.1513_154305	re04.peg.114_21419	re10.peg.2426_64001	re11.peg.1308_72032	re12.peg.1979_81465	re13.peg.1641_90273	re16.peg.6521_118455	re21.peg.5907_151983	rq23.peg.1070_167649	rq24.peg.3874_177212	rq25.peg.3010_182806	rq26.peg.2312_188836	rq27.peg.861_194665	rq28.peg.705_200931	re30.peg.5309_164978	rq29.peg.5079_213799
534	group_12878	Phosphoribosylformylglycinamidine synthase PurS subunit	30	30	1	312	15805				203	716	269	re01.peg.3973_3973	re02.peg.646_7827	re03.peg.6608_20834	re05.peg.2625_31088	re06.peg.4646_39673	re07.peg.4913_47126	re08.peg.1582_49967	re09.peg.5524_60406	re14.peg.1020_96849	re15.peg.1682_104333	re17.peg.108_119014	re18.peg.3306_129141	re19.peg.973_133519	re20.peg.3343_142117	re22.peg.1512_154304	re04.peg.115_21420	re10.peg.2425_64000	re11.peg.1307_72031	re12.peg.1978_81464	re13.peg.1642_90274	re16.peg.6522_118456	re21.peg.5906_151982	rq23.peg.1069_167648	rq24.peg.3875_177213	rq25.peg.3011_182807	rq26.peg.2313_188837	rq27.peg.862_194666	rq28.peg.706_200932	re30.peg.5308_164977	rq29.peg.5078_213798
535	group_12879	FIG00820963: Predicted deacetylase	30	30	1	312	15814				704	818	729	re01.peg.3976_3976	re02.peg.649_7830	re03.peg.6605_20831	re05.peg.2628_31091	re06.peg.4643_39670	re07.peg.4910_47123	re08.peg.1585_49970	re09.peg.5527_60409	re14.peg.1017_96846	re15.peg.1678_104329	re17.peg.111_119017	re18.peg.3303_129138	re19.peg.970_133516	re20.peg.3340_142114	re22.peg.1509_154301	re04.peg.118_21423	re10.peg.2422_63997	re11.peg.1304_72028	re12.peg.1972_81458	re13.peg.1644_90276	re16.peg.6525_118459	re21.peg.5903_151979	rq23.peg.1066_167645	rq24.peg.5341_178679	rq25.peg.3014_182810	rq26.peg.2316_188840	rq27.peg.865_194669	rq28.peg.709_200935	re30.peg.5305_164974	rq29.peg.5076_213796
536	group_12880	Glutathione peroxidase family protein	30	30	1	312	15815				497	542	501	re01.peg.3977_3977	re02.peg.650_7831	re03.peg.6604_20830	re05.peg.2629_31092	re06.peg.4642_39669	re07.peg.4909_47122	re08.peg.1586_49971	re09.peg.5528_60410	re14.peg.1016_96845	re15.peg.1677_104328	re17.peg.112_119018	re18.peg.3302_129137	re19.peg.969_133515	re20.peg.3339_142113	re22.peg.1508_154300	re04.peg.119_21424	re10.peg.2421_63996	re11.peg.1303_72027	re12.peg.1971_81457	re13.peg.1645_90277	re16.peg.6526_118460	re21.peg.5902_151978	rq23.peg.1065_167644	rq24.peg.5340_178678	rq25.peg.3015_182811	rq26.peg.2317_188841	rq27.peg.866_194670	rq28.peg.710_200936	re30.peg.5304_164973	rq29.peg.5075_213795
537	group_12882	Phosphoribosylamine--glycine ligase	30	30	1	312	15871				932	1256	1243	re01.peg.4009_4009	re02.peg.684_7865	re03.peg.6573_20799	re05.peg.2660_31123	re06.peg.4611_39638	re07.peg.4878_47091	re08.peg.1617_50002	re09.peg.5558_60440	re14.peg.986_96815	re15.peg.1628_104279	re17.peg.143_119049	re18.peg.3271_129106	re19.peg.939_133485	re20.peg.3308_142082	re22.peg.1477_154269	re04.peg.149_21454	re10.peg.2372_63947	re11.peg.1261_71985	re12.peg.1925_81411	re13.peg.1676_90308	re16.peg.6560_118494	re21.peg.5869_151945	rq23.peg.1034_167613	rq24.peg.5309_178647	rq25.peg.3046_182842	rq26.peg.2348_188872	rq27.peg.897_194701	rq28.peg.750_200976	re30.peg.5273_164942	rq29.peg.5045_213765
538	group_12884	HIT family protein	30	30	1	312	15890				377	428	417	re01.peg.4018_4018	re02.peg.695_7876	re03.peg.6562_20788	re05.peg.2670_31133	re06.peg.4600_39627	re07.peg.4867_47080	re08.peg.1628_50013	re09.peg.5567_60449	re14.peg.975_96804	re15.peg.1612_104263	re17.peg.154_119060	re18.peg.3259_129094	re19.peg.928_133474	re20.peg.3297_142071	re22.peg.1466_154258	re04.peg.158_21463	re10.peg.7339_68914	re11.peg.1245_71969	re12.peg.7561_87047	re13.peg.1686_90318	re16.peg.2818_114752	re21.peg.5859_151935	rq23.peg.1025_167604	rq24.peg.5300_178638	rq25.peg.3055_182851	rq26.peg.2357_188881	rq27.peg.906_194710	rq28.peg.761_200987	re30.peg.5264_164933	rq29.peg.5036_213756
539	group_12885	D-aminopeptidase dipeptide-binding protein DppA	30	30	1	312	15911				686	845	837	re01.peg.4027_4027	re02.peg.704_7885	re03.peg.6553_20779	re05.peg.2680_31143	re06.peg.4591_39618	re07.peg.4858_47071	re08.peg.1637_50022	re09.peg.5576_60458	re14.peg.966_96795	re15.peg.1603_104254	re17.peg.163_119069	re18.peg.1670_127506	re19.peg.918_133464	re20.peg.3287_142061	re22.peg.1457_154249	re04.peg.167_21472	re10.peg.7327_68902	re11.peg.1233_71957	re12.peg.7546_87032	re13.peg.1696_90328	re16.peg.2809_114743	re21.peg.5850_151926	rq23.peg.1016_167595	rq24.peg.5291_178629	rq25.peg.3064_182860	rq26.peg.2366_188890	rq27.peg.915_194719	rq28.peg.773_200999	re30.peg.5255_164924	rq29.peg.5027_213747
540	group_12887	peptide monooxygenase	30	30	1	312	15939				872	1346	1311	re01.peg.4040_4040	re02.peg.719_7900	re03.peg.6540_20766	re05.peg.2693_31156	re06.peg.4578_39605	re07.peg.4845_47058	re08.peg.1650_50035	re09.peg.5589_60471	re14.peg.953_96782	re15.peg.1585_104236	re17.peg.176_119082	re18.peg.1657_127493	re19.peg.905_133451	re20.peg.3274_142048	re22.peg.1444_154236	re04.peg.180_21485	re10.peg.7309_68884	re11.peg.1215_71939	re12.peg.5917_85403	re13.peg.1709_90341	re16.peg.2796_114730	re21.peg.5837_151913	rq23.peg.1003_167582	rq24.peg.5278_178616	rq25.peg.3077_182873	rq26.peg.2379_188903	rq27.peg.928_194732	rq28.peg.788_201014	re30.peg.5243_164912	rq29.peg.5013_213733
541	group_12890	Hydroxymethylpyrimidine ABC transporter ATPase component	30	30	1	312	17836				806	833	807	re01.peg.4119_4119	re02.peg.5877_13058	re03.peg.5849_20075	re05.peg.5061_33524	re06.peg.3073_38100	re07.peg.5587_47800	re08.peg.3441_51826	re09.peg.2683_57565	re14.peg.3858_99687	re15.peg.5709_108360	re17.peg.4522_123428	re18.peg.5410_131245	re19.peg.3808_136354	re20.peg.5957_144731	re22.peg.4590_157382	re04.peg.3919_25224	re10.peg.4066_65641	re11.peg.7097_77821	re12.peg.6837_86323	re13.peg.3070_91702	re16.peg.1637_113571	re21.peg.1611_147687	rq23.peg.4084_170663	rq24.peg.5445_178783	rq25.peg.5835_185631	rq26.peg.3840_190364	rq27.peg.6129_199933	rq28.peg.4368_204594	re30.peg.2646_162315	rq29.peg.36_208756
542	group_12891	Hydroxymethylpyrimidine ABC transporter transmembrane component	30	30	1	312	17837				713	803	792	re01.peg.4120_4120	re02.peg.5876_13057	re03.peg.5850_20076	re05.peg.5060_33523	re06.peg.3074_38101	re07.peg.5586_47799	re08.peg.3442_51827	re09.peg.2684_57566	re14.peg.3857_99686	re15.peg.5708_108359	re17.peg.4523_123429	re18.peg.5411_131246	re19.peg.3807_136353	re20.peg.5956_144730	re22.peg.4589_157381	re04.peg.3918_25223	re10.peg.4067_65642	re11.peg.7098_77822	re12.peg.6838_86324	re13.peg.3071_91703	re16.peg.1636_113570	re21.peg.1612_147688	rq23.peg.4083_170662	rq24.peg.5444_178782	rq25.peg.5834_185630	rq26.peg.3841_190365	rq27.peg.6128_199932	rq28.peg.4369_204595	re30.peg.2645_162314	rq29.peg.37_208757
543	group_12894	3-hydroxyisobutyryl-CoA hydrolase	30	30	1	312	17979				926	1058	1050	re01.peg.4180_4180	re02.peg.5823_13004	re03.peg.5900_20126	re05.peg.5013_33476	re06.peg.3120_38147	re07.peg.5540_47753	re08.peg.3488_51873	re09.peg.2730_57612	re14.peg.3811_99640	re15.peg.5645_108296	re17.peg.5380_124286	re18.peg.5751_131586	re19.peg.3757_136303	re20.peg.5909_144683	re22.peg.4531_157323	re04.peg.3862_25167	re10.peg.4133_65708	re11.peg.3915_74639	re12.peg.4670_84156	re13.peg.2866_91498	re16.peg.260_112194	re21.peg.1660_147736	rq23.peg.4034_170613	rq24.peg.5396_178734	rq25.peg.5785_185581	rq26.peg.5447_191971	rq27.peg.6099_199903	rq28.peg.4423_204649	re30.peg.2598_162267	rq29.peg.83_208803
544	group_12895	Diaminopimelate decarboxylase	30	30	1	312	18029				959	1505	1393	re01.peg.4213_4213	re02.peg.5790_12971	re03.peg.5930_20156	re05.peg.4982_33445	re06.peg.3150_38177	re07.peg.5510_47723	re08.peg.3522_51907	re09.peg.2760_57642	re14.peg.3781_99610	re15.peg.5603_108254	re17.peg.5410_124316	re18.peg.5720_131555	re19.peg.3727_136273	re20.peg.5879_144653	re22.peg.4501_157293	re04.peg.3830_25135	re10.peg.8810_70385	re11.peg.3954_74678	re12.peg.4713_84199	re13.peg.2835_91467	re16.peg.290_112224	re21.peg.1690_147766	rq23.peg.4004_170583	rq24.peg.5366_178704	rq25.peg.5754_185550	rq26.peg.5417_191941	rq27.peg.6068_199872	rq28.peg.4461_204687	re30.peg.2568_162237	rq29.peg.113_208833
545	group_12896	Homoserine kinase	30	30	1	312	18032				743	989	932	re01.peg.4216_4216	re02.peg.5784_12965	re03.peg.5933_20159	re05.peg.4979_33442	re06.peg.3153_38180	re07.peg.5507_47720	re08.peg.3525_51910	re09.peg.2763_57645	re14.peg.3778_99607	re15.peg.5598_108249	re17.peg.5413_124319	re18.peg.5717_131552	re19.peg.3724_136270	re20.peg.5876_144650	re22.peg.4498_157290	re04.peg.3827_25132	re10.peg.8805_70380	re11.peg.3959_74683	re12.peg.4719_84205	re13.peg.2832_91464	re16.peg.293_112227	re21.peg.1694_147770	rq23.peg.4001_170580	rq24.peg.5363_178701	rq25.peg.5751_185547	rq26.peg.5414_191938	rq27.peg.6065_199869	rq28.peg.4465_204691	re30.peg.2565_162234	rq29.peg.116_208836
546	group_12897	ATP synthase protein I	30	30	1	312	18044				383	479	415	re01.peg.4224_4224	re02.peg.5774_12955	re03.peg.5941_20167	re05.peg.4969_33432	re06.peg.3161_38188	re07.peg.5499_47712	re08.peg.3533_51918	re09.peg.2771_57653	re14.peg.3770_99599	re15.peg.5587_108238	re17.peg.5421_124327	re18.peg.5707_131542	re19.peg.3716_136262	re20.peg.5868_144642	re22.peg.4490_157282	re04.peg.3819_25124	re10.peg.8022_69597	re11.peg.7671_78395	re12.peg.7809_87295	re13.peg.2824_91456	re16.peg.301_112235	re21.peg.1702_147778	rq23.peg.3993_170572	rq24.peg.5355_178693	rq25.peg.5743_185539	rq26.peg.5406_191930	rq27.peg.6057_199861	rq28.peg.4476_204702	re30.peg.2557_162226	rq29.peg.124_208844
547	group_12898	ATP synthase F0 sector subunit a	30	30	1	312	18045				686	938	816	re01.peg.4225_4225	re02.peg.5773_12954	re03.peg.5942_20168	re05.peg.4968_33431	re06.peg.3162_38189	re07.peg.5498_47711	re08.peg.3534_51919	re09.peg.2772_57654	re14.peg.3769_99598	re15.peg.5586_108237	re17.peg.5422_124328	re18.peg.5706_131541	re19.peg.3715_136261	re20.peg.5867_144641	re22.peg.4489_157281	re04.peg.3818_25123	re10.peg.8021_69596	re11.peg.7670_78394	re12.peg.7810_87296	re13.peg.2823_91455	re16.peg.302_112236	re21.peg.1703_147779	rq23.peg.3992_170571	rq24.peg.5354_178692	rq25.peg.5742_185538	rq26.peg.5405_191929	rq27.peg.6056_199860	rq28.peg.4477_204703	re30.peg.2556_162225	rq29.peg.125_208845
548	group_12899	ATP synthase F0 sector subunit b	30	30	1	312	18047				539	560	555	re01.peg.4227_4227	re02.peg.5771_12952	re03.peg.5944_20170	re05.peg.4966_33429	re06.peg.3164_38191	re07.peg.5496_47709	re08.peg.3536_51921	re09.peg.2774_57656	re14.peg.3767_99596	re15.peg.5584_108235	re17.peg.5424_124330	re18.peg.5704_131539	re19.peg.3713_136259	re20.peg.5865_144639	re22.peg.4487_157279	re04.peg.3816_25121	re10.peg.8019_69594	re11.peg.7668_78392	re12.peg.7812_87298	re13.peg.2821_91453	re16.peg.304_112238	re21.peg.1705_147781	rq23.peg.3990_170569	rq24.peg.5352_178690	rq25.peg.5740_185536	rq26.peg.5403_191927	rq27.peg.6054_199858	rq28.peg.4479_204705	re30.peg.2554_162223	rq29.peg.127_208847
549	group_12901	ATP:Cob(I)alamin adenosyltransferase	30	30	1	312	18067				233	623	562	re01.peg.4234_4234	re02.peg.5762_12943	re03.peg.5951_20177	re05.peg.4959_33422	re06.peg.3171_38198	re07.peg.5489_47702	re08.peg.3543_51928	re09.peg.2781_57663	re14.peg.3760_99589	re15.peg.5574_108225	re17.peg.5431_124337	re18.peg.5697_131532	re19.peg.3706_136252	re20.peg.5858_144632	re22.peg.4480_157272	re04.peg.3809_25114	re10.peg.8011_69586	re11.peg.7660_78384	re12.peg.7822_87308	re13.peg.2814_91446	re16.peg.311_112245	re21.peg.1712_147788	rq23.peg.3983_170562	rq24.peg.5345_178683	rq25.peg.5733_185529	rq26.peg.5396_191920	rq27.peg.6047_199851	rq28.peg.4488_204714	re30.peg.2547_162216	rq29.peg.134_208854
550	group_12913	Putative stomatin/prohibitin-family membrane protease subunit aq_911	30	30	1	312	30442				671	893	815	re01.peg.4296_4296	re02.peg.4813_11994	re03.peg.5262_19488	re05.peg.6244_34707	re06.peg.2071_37099	re07.peg.60_42273	re08.peg.4667_53052	re09.peg.777_55659	re14.peg.5856_101685	re15.peg.8486_111137	re17.peg.6312_125218	re18.peg.6117_131952	re19.peg.5765_138311	re20.peg.2133_140907	re22.peg.6485_159277	re04.peg.5506_26811	re10.peg.6540_68115	re11.peg.3741_74465	re12.peg.5473_84959	re13.peg.5651_94283	re16.peg.1728_113662	re21.peg.6196_152272	rq23.peg.6190_172769	rq24.peg.3938_177276	rq25.peg.4533_184329	rq26.peg.348_186872	rq27.peg.2086_195890	rq28.peg.2815_203041	re30.peg.4794_164463	rq29.peg.5899_214619
551	group_12914	putative two-component system response regulator	30	30	1	312	30402				299	299	299	re01.peg.4310_4310	re02.peg.4827_12008	re03.peg.86_14312	re05.peg.4_28467	re06.peg.2047_37075	re07.peg.74_42287	re08.peg.4691_53076	re09.peg.792_55674	re14.peg.5842_101671	re15.peg.8465_111116	re17.peg.5115_124021	re18.peg.3488_129323	re19.peg.5742_138288	re20.peg.2119_140893	re22.peg.6470_159262	re04.peg.5481_26786	re10.peg.3317_64892	re11.peg.4_70728	re12.peg.1507_80993	re13.peg.6387_95019	re16.peg.1743_113677	re21.peg.1558_147634	rq23.peg.6176_172755	rq24.peg.3953_177291	rq25.peg.4548_184344	rq26.peg.364_186888	rq27.peg.2101_195905	rq28.peg.2835_203061	re30.peg.4778_164447	rq29.peg.5915_214635
552	group_12917	LSU ribosomal protein L9p	30	30	1	312	30391				401	563	456	re01.peg.4318_4318	re02.peg.4835_12016	re03.peg.94_14320	re05.peg.12_28475	re06.peg.2039_37067	re07.peg.82_42295	re08.peg.4699_53084	re09.peg.800_55682	re14.peg.5834_101663	re15.peg.8455_111106	re17.peg.5123_124029	re18.peg.3497_129332	re19.peg.5734_138280	re20.peg.2111_140885	re22.peg.6462_159254	re04.peg.5473_26778	re10.peg.3327_64902	re11.peg.14_70738	re12.peg.1496_80982	re13.peg.6379_95011	re16.peg.1751_113685	re21.peg.1550_147626	rq23.peg.6168_172747	rq24.peg.3961_177299	rq25.peg.4556_184352	rq26.peg.372_186896	rq27.peg.2111_195915	rq28.peg.2846_203072	re30.peg.4769_164438	rq29.peg.5923_214643
553	group_12925	hypothetical protein	30	30	1	312	30139				236	236	236	re01.peg.4417_4417	re02.peg.4915_12096	re03.peg.173_14399	re05.peg.101_28564	re06.peg.1278_36306	re07.peg.173_42386	re08.peg.6262_54647	re09.peg.929_55811	re14.peg.5699_101528	re15.peg.8305_110956	re17.peg.5547_124453	re18.peg.3576_129411	re19.peg.5623_138169	re20.peg.2011_140785	re22.peg.6381_159173	re04.peg.2157_23462	re10.peg.2229_63804	re11.peg.160_70884	re12.peg.30_79516	re13.peg.6263_94895	re16.peg.1851_113785	re21.peg.3168_149244	rq23.peg.6070_172649	rq24.peg.4136_177474	rq25.peg.4650_184446	rq26.peg.23_186547	rq27.peg.2219_196023	rq28.peg.4128_204354	re30.peg.4638_164307	rq29.peg.6053_214773
554	group_12929	hypothetical protein	30	30	1	312	30104				236	236	236	re01.peg.4429_4429	re02.peg.4926_12107	re03.peg.186_14412	re05.peg.112_28575	re06.peg.1267_36295	re07.peg.184_42397	re08.peg.4_48389	re09.peg.940_55822	re14.peg.5687_101516	re15.peg.8291_110942	re17.peg.5535_124441	re18.peg.3588_129423	re19.peg.5612_138158	re20.peg.2000_140774	re22.peg.6370_159162	re04.peg.2169_23474	re10.peg.2246_63821	re11.peg.174_70898	re12.peg.47_79533	re13.peg.6251_94883	re16.peg.1863_113797	re21.peg.3182_149258	rq23.peg.6058_172637	rq24.peg.527_173865	rq25.peg.4663_184459	rq26.peg.35_186559	rq27.peg.2236_196040	rq28.peg.4114_204340	re30.peg.4626_164295	rq29.peg.6065_214785
555	group_12931	hypothetical protein	30	30	1	312	9072				305	371	327	re01.peg.4478_4478	re02.peg.429_7610	re03.peg.2788_17014	re05.peg.5572_34035	re06.peg.2191_37219	re07.peg.2122_44335	re08.peg.1387_49772	re09.peg.5336_60218	re14.peg.1218_97047	re15.peg.1943_104594	re17.peg.2738_121644	re18.peg.4697_130532	re19.peg.1166_133712	re20.peg.3856_142630	re22.peg.1708_154500	re04.peg.5576_26881	re10.peg.1292_62867	re11.peg.827_71551	re12.peg.2080_81566	re13.peg.553_89185	re16.peg.6295_118229	re21.peg.1743_147819	rq23.peg.1271_167850	rq24.peg.374_173712	rq25.peg.5707_185503	rq26.peg.6919_193443	rq27.peg.659_194463	rq28.peg.6756_206981	re30.peg.5507_165176	rq29.peg.248_208968
556	group_12932	hypothetical protein	30	30	1	312	8801				131	284	278	re01.peg.4576_4576	re02.peg.401_7582	re03.peg.3677_17903	re05.peg.5533_33996	re06.peg.2255_37283	re07.peg.2159_44372	re08.peg.3745_52130	re09.peg.5298_60180	re14.peg.1265_97094	re15.peg.2000_104651	re17.peg.2782_121688	re18.peg.4672_130507	re19.peg.1203_133749	re20.peg.3823_142597	re22.peg.1734_154526	re04.peg.4079_25384	re10.peg.1233_62808	re11.peg.878_71602	re12.peg.2136_81622	re13.peg.596_89228	re16.peg.6250_118184	re21.peg.3918_149994	rq23.peg.1315_167894	rq24.peg.408_173746	rq25.peg.5644_185440	rq26.peg.6977_193501	rq27.peg.624_194428	rq28.peg.7614_207839	re30.peg.5540_165209	rq29.peg.293_209013
557	group_12934	RNA polymerase sigma factor SigB	30	30	1	312	8765				701	818	796	re01.peg.4596_4596	re02.peg.379_7560	re03.peg.3657_17883	re05.peg.5513_33976	re06.peg.2275_37303	re07.peg.2179_44392	re08.peg.3765_52150	re09.peg.5278_60160	re14.peg.1285_97114	re15.peg.2027_104678	re17.peg.2802_121708	re18.peg.4652_130487	re19.peg.1223_133769	re20.peg.3803_142577	re22.peg.1754_154546	re04.peg.4059_25364	re10.peg.1212_62787	re11.peg.899_71623	re12.peg.2161_81647	re13.peg.616_89248	re16.peg.6229_118163	re21.peg.3898_149974	rq23.peg.1336_167915	rq24.peg.428_173766	rq25.peg.5624_185420	rq26.peg.6997_193521	rq27.peg.604_194408	rq28.peg.6844_207069	re30.peg.5560_165229	rq29.peg.313_209033
558	group_12935	Sporulation regulatory protein WhiD	30	30	1	312	8761				125	317	272	re01.peg.4599_4599	re02.peg.376_7557	re03.peg.3654_17880	re05.peg.5510_33973	re06.peg.2278_37306	re07.peg.2182_44395	re08.peg.3768_52153	re09.peg.5275_60157	re14.peg.1288_97117	re15.peg.2030_104681	re17.peg.2805_121711	re18.peg.4649_130484	re19.peg.1226_133772	re20.peg.3800_142574	re22.peg.1757_154549	re04.peg.4056_25361	re10.peg.1208_62783	re11.peg.902_71626	re12.peg.2165_81651	re13.peg.619_89251	re16.peg.6226_118160	re21.peg.3895_149971	rq23.peg.1339_167918	rq24.peg.431_173769	rq25.peg.5621_185417	rq26.peg.7000_193524	rq27.peg.601_194405	rq28.peg.6841_207066	re30.peg.5563_165232	rq29.peg.316_209036
559	group_12936	HspR transcriptional repressor of DnaK operon	30	30	1	312	8756				152	302	289	re01.peg.4604_4604	re02.peg.371_7552	re03.peg.3649_17875	re05.peg.5505_33968	re06.peg.2283_37311	re07.peg.2187_44400	re08.peg.3773_52158	re09.peg.5270_60152	re14.peg.1293_97122	re15.peg.2035_104686	re17.peg.2810_121716	re18.peg.4644_130479	re19.peg.1231_133777	re20.peg.3795_142569	re22.peg.1762_154554	re04.peg.4051_25356	re10.peg.1203_62778	re11.peg.907_71631	re12.peg.2170_81656	re13.peg.624_89256	re16.peg.6221_118155	re21.peg.3890_149966	rq23.peg.1344_167923	rq24.peg.436_173774	rq25.peg.5616_185412	rq26.peg.7005_193529	rq27.peg.596_194400	rq28.peg.6836_207061	re30.peg.5568_165237	rq29.peg.321_209041
560	group_12938	hypothetical protein	30	30	1	312	8733				449	590	562	re01.peg.4620_4620	re02.peg.356_7537	re03.peg.3635_17861	re05.peg.5491_33954	re06.peg.2298_37326	re07.peg.2200_44413	re08.peg.3787_52172	re09.peg.5256_60138	re14.peg.1307_97136	re15.peg.2049_104700	re17.peg.2824_121730	re18.peg.4630_130465	re19.peg.1245_133791	re20.peg.3780_142554	re22.peg.1776_154568	re04.peg.4037_25342	re10.peg.1186_62761	re11.peg.925_71649	re12.peg.3966_83452	re13.peg.638_89270	re16.peg.6206_118140	re21.peg.3876_149952	rq23.peg.1360_167939	rq24.peg.452_173790	rq25.peg.5601_185397	rq26.peg.3540_190064	rq27.peg.581_194385	rq28.peg.6821_207046	re30.peg.5583_165252	rq29.peg.337_209057
561	group_12943	Nitrilotriacetate monooxygenase component B	30	30	1	312	29127				398	569	553	re01.peg.4676_4676	re02.peg.2907_10088	re03.peg.2591_16817	re05.peg.459_28922	re06.peg.1687_36715	re07.peg.523_42736	re08.peg.354_48739	re09.peg.1280_56162	re14.peg.5360_101189	re15.peg.7755_110406	re17.peg.3873_122779	re18.peg.235_126071	re19.peg.5267_137813	re20.peg.1660_140434	re22.peg.6041_158833	re04.peg.2519_23824	re10.peg.4344_65919	re11.peg.1593_72317	re12.peg.4821_84307	re13.peg.5668_94300	re16.peg.1212_113146	re21.peg.950_147026	rq23.peg.5641_172220	rq24.peg.889_174227	rq25.peg.1179_180975	rq26.peg.1368_187892	rq27.peg.2600_196404	rq28.peg.6394_206619	re30.peg.4156_163825	rq29.peg.2165_210885
562	group_12946	Ubiquinone biosynthesis monooxygenase UbiB	30	30	1	312	29086				1304	1442	1373	re01.peg.4692_4692	re02.peg.2894_10075	re03.peg.2579_16805	re05.peg.471_28934	re06.peg.1675_36703	re07.peg.535_42748	re08.peg.366_48751	re09.peg.1293_56175	re14.peg.5348_101177	re15.peg.7732_110383	re17.peg.3888_122794	re18.peg.247_126083	re19.peg.5255_137801	re20.peg.1648_140422	re22.peg.6028_158820	re04.peg.2535_23840	re10.peg.4324_65899	re11.peg.1612_72336	re12.peg.4841_84327	re13.peg.5683_94315	re16.peg.1197_113131	re21.peg.935_147011	rq23.peg.5626_172205	rq24.peg.905_174243	rq25.peg.1164_180960	rq26.peg.1383_187907	rq27.peg.2615_196419	rq28.peg.6375_206600	re30.peg.4140_163809	rq29.peg.2150_210870
563	group_12947	Transcriptional regulator TetR family	30	30	1	312	29013				539	599	597	re01.peg.4731_4731	re02.peg.2853_10034	re03.peg.2542_16768	re05.peg.510_28973	re06.peg.1639_36667	re07.peg.574_42787	re08.peg.405_48790	re09.peg.1329_56211	re14.peg.5313_101142	re15.peg.7666_110317	re17.peg.3929_122835	re18.peg.283_126119	re19.peg.5215_137761	re20.peg.1611_140385	re22.peg.5992_158784	re04.peg.2575_23880	re10.peg.4277_65852	re11.peg.1655_72379	re12.peg.1661_81147	re13.peg.5726_94358	re16.peg.1157_113091	re21.peg.883_146959	rq23.peg.5586_172165	rq24.peg.946_174284	rq25.peg.1125_180921	rq26.peg.1423_187947	rq27.peg.2657_196461	rq28.peg.7122_207347	re30.peg.4099_163768	rq29.peg.2112_210832
564	group_12949	ABC transporter substrate-binding protein	30	30	1	312	29007				884	1022	910	re01.peg.4735_4735	re02.peg.2849_10030	re03.peg.2538_16764	re05.peg.514_28977	re06.peg.1635_36663	re07.peg.578_42791	re08.peg.409_48794	re09.peg.1333_56215	re14.peg.5309_101138	re15.peg.7662_110313	re17.peg.3933_122839	re18.peg.287_126123	re19.peg.5211_137757	re20.peg.1607_140381	re22.peg.5988_158780	re04.peg.2579_23884	re10.peg.4272_65847	re11.peg.1660_72384	re12.peg.1666_81152	re13.peg.5730_94362	re16.peg.1153_113087	re21.peg.879_146955	rq23.peg.5582_172161	rq24.peg.950_174288	rq25.peg.1121_180917	rq26.peg.1427_187951	rq27.peg.2661_196465	rq28.peg.7117_207342	re30.peg.4095_163764	rq29.peg.2108_210828
565	group_12950	Copper binding protein plastocyanin/azurin family	30	30	1	312	29002				347	347	347	re01.peg.4737_4737	re02.peg.2847_10028	re03.peg.2536_16762	re05.peg.516_28979	re06.peg.1633_36661	re07.peg.580_42793	re08.peg.411_48796	re09.peg.1335_56217	re14.peg.5307_101136	re15.peg.7659_110310	re17.peg.3935_122841	re18.peg.290_126126	re19.peg.5209_137755	re20.peg.1605_140379	re22.peg.5986_158778	re04.peg.2581_23886	re10.peg.4269_65844	re11.peg.1663_72387	re12.peg.1669_81155	re13.peg.5732_94364	re16.peg.1150_113084	re21.peg.877_146953	rq23.peg.5580_172159	rq24.peg.952_174290	rq25.peg.1119_180915	rq26.peg.1429_187953	rq27.peg.2663_196467	rq28.peg.7114_207339	re30.peg.4093_163762	rq29.peg.2106_210826
[truncated: 31,950 more rows]
